# Supplementary material for: Enhancer Hijacking Drives Oncogenic BCL11B Expression in Lineage-Ambiguous Stem Cell Leukemia
Source: Oxford University Press journal article supplement (doi:10.1158/2159-8290.cd-21-0145), 2021-06-08
Supplement: 21598290cd210145-sup-bcl11b_cancerdiscovery_supptables_revised_for_proof.xlsx [file 21598290cd210145-sup-bcl11b_cancerdiscovery_supptables_revised_for_proof.xlsx]

## Sheet: ST1.Full cohort
Sample	Disease	Subtype/group	Fusion	X-tSNE	Y-tSNE	RNAseq library	Reference	PMID	RNAseq Accession
SJBALL015143_D1	B-ALL	BCL2/MYC	REPS1-BCL2;ATP5L-FOXR1	30.301	1.50933	Stranded_total_RNA_PE100bp	Gu et al. Nature Genetics 2019	30643249	EGAS00001003266
SJBALL015051_D1	B-ALL	BCL2/MYC	IGH-BCL2;FANCL-WDPCP	31.1973	0.45904	Stranded_total_RNA_PE100bp	Gu et al. Nature Genetics 2019	30643249	EGAS00001003266
SJALL049977_D1	B-ALL	BCL2/MYC	IGH-BCL6	30.1531	2.8557	Stranded_total_RNA_PE100bp	Gu et al. Nature Genetics 2019	30643249	EGAS00001003266
SJALL054484_D1	B-ALL	BCL2/MYC	IGH-BCL2;IGH-MYC	24.6086	3.74391	Stranded_total_RNA_PE100bp	Gu et al. Nature Genetics 2019	30643249	EGAS00001003266
SJALL061708_D1	B-ALL	BCL2/MYC	BCL2-IGH	30.5602	-1.6379	Stranded_total_RNA_PE100bp	this study	this study	EGAS00001004810
SJALL040065_D1	B-ALL	BCL2/MYC	IGH-BCL2	31.6388	-6.05003	Stranded_total_RNA_PE100bp	Gu et al. Nature Genetics 2019	30643249	EGAS00001003266
SJALL049676_D1	B-ALL	BCL2/MYC	BCL2-IGH	30.3079	-0.781572	Stranded_total_RNA_PE100bp	Gu et al. Nature Genetics 2019	30643249	EGAS00001003266
SJBALL015046_D1	B-ALL	BCL2/MYC	IGH-MYC	30.5489	0.999196	Stranded_total_RNA_PE100bp	Gu et al. Nature Genetics 2019	30643249	EGAS00001003266
SJALL054549_D1	B-ALL	BCL2/MYC	ATF7IP-BCL6	32.7051	-2.15923	Stranded_total_RNA_PE100bp	this study	this study	EGAS00001004810
SJALL049978_D1	B-ALL	BCL2/MYC	BCL2-IGH;BACH2-MYC	31.8807	-0.434634	Stranded_total_RNA_PE100bp	Gu et al. Nature Genetics 2019	30643249	EGAS00001003266
SJBALL048062_D1	B-ALL	BCL2/MYC	IGH-MYC	31.0791	-3.88566	Stranded_total_RNA_PE100bp	Gu et al. Nature Genetics 2019	30643249	EGAS00001003266
SJBALL014635_D1	B-ALL	BCL2/MYC	BCL2-IGH;AKAP13-BRI3	32.0388	-1.37088	Stranded_total_RNA_PE100bp	Gu et al. Nat Comm 2016	27824051	EGAS00001001952
SJBALL046136_D1	B-ALL	BCL2/MYC	BCL2-IGH	31.8279	1.24644	Stranded_total_RNA_PE100bp	Gu et al. Nature Genetics 2019	30643249	EGAS00001003266
SJBALL022428_D1	B-ALL	BCL2/MYC	IGH-MYC	32.9105	0.117848	Stranded_total_RNA_PE100bp	Gu et al. Nature Genetics 2019	30643249	EGAS00001003266
SJBALL013910_D1	B-ALL	BCL2/MYC	CCND1-IGH;PVT1-IGH	28.7484	0.800926	Stranded_total_RNA_PE100bp	Gu et al. Nature Genetics 2019	30643249	EGAS00001003266
SJALL054460_D1	B-ALL	BCL2/MYC	IGH-BCL2;IGH-MYC	32.3918	-0.805024	Stranded_total_RNA_PE100bp	Gu et al. Nature Genetics 2019	30643249	EGAS00001003266
SJALL049667_D1	B-ALL	BCL2/MYC	BCL2-IGH	31.3833	-4.65555	Stranded_total_RNA_PE100bp	Gu et al. Nature Genetics 2019	30643249	EGAS00001003266
SJBALL021707_D1	B-ALL	BCL2/MYC	IGH-MYC	30.9799	2.77919	Unstranded_mRNA_PE100bp	Gu et al. Nat Comm 2016	27824051	EGAS00001001952
SJBALL015085_D1	B-ALL	BCL2/MYC	BCL2-IGH	33.7378	-0.815339	Stranded_total_RNA_PE100bp	Gu et al. Nature Genetics 2019	30643249	EGAS00001003266
SJALL061957_D1	B-ALL	BCL2/MYC	MYC-IGH	29.7998	0.919127	Stranded_total_RNA_PE100bp	this study	this study	EGAS00001004810
SJBALL015195_D1	B-ALL	BCL2/MYC	IGH-WHSC1	28.9149	6.17126	Stranded_total_RNA_PE100bp	Gu et al. Nature Genetics 2019	30643249	EGAS00001003266
SJBALL020340_D1	B-ALL	DUX4	IGH-DUX4	-135.48	55.4506	Unstranded_mRNA_PE100bp	Zhang et al. Nature Genetics 2016	27776115	EGAS00001001923
SJALL040053_D1	B-ALL	DUX4	DUX4-IGH	-128.375	49.8122	Stranded_total_RNA_PE100bp	Gu et al. Nature Genetics 2019	30643249	EGAS00001003266
SJALL047522_D1	B-ALL	DUX4	IGH-DUX4	-127.13	48.3397	Stranded_total_RNA_PE100bp	this study	this study	EGAS00001004810
SJERG020307_D1	B-ALL	DUX4	IGH-DUX4	-136.392	50.1905	Unstranded_mRNA_PE100bp	Gu et al. Nature Genetics 2019	30643249	EGAS00001003266
SJERG030_D	B-ALL	DUX4	IGH-DUX4	-133.725	45.1037	Unstranded_mRNA_PE100bp	Gu et al. Nature Genetics 2019	30643249	EGAS00001003266
SJALL057943_D1	B-ALL	DUX4	DUX4-IGH	-129.578	52.1337	Stranded_total_RNA_PE100bp	this study	this study	EGAS00001004810
SJBALL015175_D1	B-ALL	DUX4	NoFusion(DUX4	-127.721	55.484	Stranded_total_RNA_PE100bp	Gu et al. Nature Genetics 2019	30643249	EGAS00001003266
SJERG010_D	B-ALL	DUX4	IGH-DUX4	-134.659	50.6626	Unstranded_mRNA_PE100bp	Gu et al. Nature Genetics 2019	30643249	EGAS00001003266
SJBALL243_D	B-ALL	DUX4	DUX4-IGH	-130.898	46.3588	Stranded_total_RNA_PE100bp	Gu et al. Nature Genetics 2019	30643249	EGAS00001003266
SJALL040080_D1	B-ALL	DUX4	DUX4-ETV6	-133.542	40.9475	Stranded_total_RNA_PE100bp	Gu et al. Nature Genetics 2019	30643249	EGAS00001003266
SJALL048159_D1	B-ALL	DUX4	IGH-DUX4(IGV)	-130.568	52.0896	Stranded_total_RNA_PE100bp	this study	this study	EGAS00001004810
SJERG020308_D1	B-ALL	DUX4	IGH-DUX4	-130.918	49.5926	Unstranded_mRNA_PE100bp	Gu et al. Nature Genetics 2019	30643249	EGAS00001003266
SJALL047530_D1	B-ALL	DUX4	IGH-DUX4	-136.388	46.9168	Stranded_total_RNA_PE100bp	this study	this study	EGAS00001004810
SJBALL021516_D1	B-ALL	DUX4	IGH-DUX4	-134.543	55.1837	Unstranded_mRNA_PE100bp	Zhang et al. Nature Genetics 2016	27776115	EGAS00001001923
SJBALL020828_D1	B-ALL	DUX4	IGH-DUX4	-129.229	50.4942	Unstranded_mRNA_PE100bp	Zhang et al. Nature Genetics 2016	27776115	EGAS00001001923
SJERG019_D	B-ALL	DUX4	DUX4-IGH	-138.69	45.7486	Stranded_total_RNA_PE100bp	Gu et al. Nature Genetics 2019	30643249	EGAS00001003266
SJBALL048070_D1	B-ALL	DUX4	DUX4-IGH	-125.06	51.3084	Stranded_total_RNA_PE100bp	Gu et al. Nature Genetics 2019	30643249	EGAS00001003266
SJERG020_D	B-ALL	DUX4	DUX4-IGH	-130.625	51.1374	Unstranded_mRNA_PE100bp	Gu et al. Nature Genetics 2019	30643249	EGAS00001003266
SJALL058975_D1	B-ALL	DUX4	IGH-DUX4	-132.957	45.358	Stranded_total_RNA_PE100bp	this study	this study	EGAS00001004810
SJBALL021130_D1	B-ALL	DUX4	IGH-DUX4	-138.831	47.6701	Unstranded_mRNA_PE100bp	Zhang et al. Nature Genetics 2016	27776115	EGAS00001001923
SJERG020051_D1	B-ALL	DUX4	IGH-DUX4	-138.923	47.0131	Unstranded_mRNA_PE100bp	Gu et al. Nature Genetics 2019	30643249	EGAS00001003266
SJALL054513_D1	B-ALL	DUX4	IGH-DUX4	-130.307	53.8858	Stranded_total_RNA_PE100bp	Gu et al. Nature Genetics 2019	30643249	EGAS00001003266
SJBALL230_D	B-ALL	DUX4	IGH-DUX4	-134.235	43.5868	Stranded_total_RNA_PE100bp	Zhang et al. Nature Genetics 2016	27776115	EGAS00001001923
SJBALL015165_D1	B-ALL	DUX4	DUX4-IGH	-135.636	44.974	Stranded_total_RNA_PE100bp	Gu et al. Nature Genetics 2019	30643249	EGAS00001003266
SJERG020299_D1	B-ALL	DUX4	IGH-DUX4	-133.24	50.6562	Stranded_total_RNA_PE100bp	Gu et al. Nature Genetics 2019	30643249	EGAS00001003266
SJBALL015065_D1	B-ALL	DUX4	DUX4-IGH	-134.199	47.8445	Stranded_total_RNA_PE100bp	Gu et al. Nature Genetics 2019	30643249	EGAS00001003266
SJALL054489_D1	B-ALL	DUX4	IGH-DUX4	-131.875	54.2977	Stranded_total_RNA_PE100bp	Gu et al. Nature Genetics 2019	30643249	EGAS00001003266
SJERG011_D	B-ALL	DUX4	IGH-DUX4	-130.313	46.2993	Stranded_total_RNA_PE100bp	Gu et al. Nature Genetics 2019	30643249	EGAS00001003266
SJBALL030145_D1	B-ALL	DUX4	DUX4-IGH	-139.048	40.8834	Stranded_total_RNA_PE125bp	this study	this study	EGAS00001004810
SJALL040122_D1	B-ALL	DUX4	DUX4-IGH	-138.416	43.4075	Stranded_total_RNA_PE100bp	Gu et al. Nature Genetics 2019	30643249	EGAS00001003266
SJERG020305_D1	B-ALL	DUX4	MT.ND6-DUX4(IGV-contig)	-136.574	50.6635	Unstranded_mRNA_PE100bp	Gu et al. Nature Genetics 2019	30643249	EGAS00001003266
SJERG003_D	B-ALL	DUX4	IGH-DUX4	-129.45	47.3859	Unstranded_mRNA_PE100bp	Gu et al. Nature Genetics 2019	30643249	EGAS00001003266
SJERG020306_D1	B-ALL	DUX4	IGH-DUX4	-134.386	57.5435	Unstranded_mRNA_PE100bp	Gu et al. Nature Genetics 2019	30643249	EGAS00001003266
SJERG029_D	B-ALL	DUX4	IGH-DUX4	-136.445	41.9337	Unstranded_mRNA_PE100bp	Gu et al. Nature Genetics 2019	30643249	EGAS00001003266
SJERG008_D	B-ALL	DUX4	IGH-DUX4	-130.349	48.1268	Unstranded_mRNA_PE100bp	Gu et al. Nature Genetics 2019	30643249	EGAS00001003266
SJERG020302_D1	B-ALL	DUX4	IGH-DUX4	-139.633	44.6576	Unstranded_mRNA_PE100bp	Gu et al. Nature Genetics 2019	30643249	EGAS00001003266
SJALL047973_D1	B-ALL	DUX4	DUX4-SP3	-125.505	51.9026	Stranded_total_RNA_PE100bp	this study	this study	EGAS00001004810
SJALL049986_D1	B-ALL	DUX4	IGH-DUX4	-134.156	47.08	Stranded_total_RNA_PE100bp	Gu et al. Nature Genetics 2019	30643249	EGAS00001003266
SJALL049966_D1	B-ALL	DUX4	IGH-DUX4	-128.101	49.1399	Stranded_total_RNA_PE100bp	Gu et al. Nature Genetics 2019	30643249	EGAS00001003266
SJBALL215_D	B-ALL	DUX4	IGH-DUX4	-137.409	43.442	Unstranded_mRNA_PE100bp	Zhang et al. Nature Genetics 2016	27776115	EGAS00001001923
SJALL054756_D1	B-ALL	DUX4	DUX4-IGH	-126.772	51.4453	Stranded_total_RNA_PE100bp	this study	this study	EGAS00001004810
SJALL040120_D1	B-ALL	DUX4	DUX4-IGH	-136.522	46.2932	Stranded_total_RNA_PE100bp	Gu et al. Nature Genetics 2019	30643249	EGAS00001003266
SJBALL021489_D1	B-ALL	DUX4	DUX4-IGH	-131.708	56.6204	Unstranded_mRNA_PE100bp	Zhang et al. Nature Genetics 2016	27776115	EGAS00001001923
SJERG016_D	B-ALL	DUX4	IGH-DUX4	-138.39	41.5208	Stranded_total_RNA_PE100bp	Gu et al. Nature Genetics 2019	30643249	EGAS00001003266
SJALL049493_D1	B-ALL	DUX4	DUX4-IGH;RSF1-INTS4;PARG-BMS1	-125.75	53.5732	Stranded_total_RNA_PE100bp	this study	this study	EGAS00001004810
SJBALL227_D	B-ALL	DUX4	DUX4-IGH	-137.527	41.8644	Unstranded_mRNA_PE100bp	Zhang et al. Nature Genetics 2016	27776115	EGAS00001001923
SJBALL218_D	B-ALL	DUX4	IGH-DUX4	-132.943	43.5108	Stranded_total_RNA_PE100bp	Zhang et al. Nature Genetics 2016	27776115	EGAS00001001923
SJALL059345_D1	B-ALL	DUX4	IGH-DUX4;CRKL-LZTR1	-131.356	51.846	Stranded_total_RNA_PE100bp	this study	this study	EGAS00001004810
SJERG004_D	B-ALL	DUX4	IGH-DUX4	-136.797	41.3418	Unstranded_mRNA_PE100bp	Gu et al. Nature Genetics 2019	30643249	EGAS00001003266
SJBALL009_D	B-ALL	DUX4	DUX4-IGH	-141.565	38.1002	Unstranded_mRNA_PE75bp	this study	this study	EGAS00001004810
SJERG006_D	B-ALL	DUX4	IGH-DUX4	-141.566	38.1001	Unstranded_mRNA_PE75bp	Gu et al. Nature Genetics 2019	30643249	EGAS00001003266
SJBALL001761_D1	B-ALL	DUX4	LINC02193-DUX4	-136.65	48.2385	Stranded_total_RNA_PE100bp	Gu et al. Nature Genetics 2019	30643249	EGAS00001003266
SJALL040114_D1	B-ALL	DUX4	DUX4-IGH	-138.82	42.1545	Stranded_total_RNA_PE100bp	Gu et al. Nature Genetics 2019	30643249	EGAS00001003266
SJBALL008_D	B-ALL	DUX4	IGH-DUX4	-142.158	38.7201	Unstranded_mRNA_PE75bp	this study	this study	EGAS00001004810
SJBALL020383_D1	B-ALL	DUX4	DUX4-IGH	-134.014	54.6466	Unstranded_mRNA_PE100bp	Zhang et al. Nature Genetics 2016	27776115	EGAS00001001923
SJERG003613_D2	B-ALL	DUX4	DUX4-IGH	-135.631	43.7827	Stranded_total_RNA_PE100bp	Gu et al. Nature Genetics 2019	30643249	EGAS00001003266
SJBALL007_D	B-ALL	DUX4	DUX4-IGH	-140.308	38.3441	Unstranded_mRNA_PE75bp	this study	this study	EGAS00001004810
SJBALL021324_D1	B-ALL	DUX4	IGH-DUX4	-134.835	56.7909	Unstranded_mRNA_PE100bp	Zhang et al. Nature Genetics 2016	27776115	EGAS00001001923
SJALL040103_D1	B-ALL	DUX4	DUX4-IGH;PAX5-ZCCHC7	-132.769	48.2283	Stranded_total_RNA_PE100bp	Gu et al. Nature Genetics 2019	30643249	EGAS00001003266
SJERG024_D	B-ALL	DUX4	IGH-DUX4	-136.085	40.7976	Unstranded_mRNA_PE100bp	Gu et al. Nature Genetics 2019	30643249	EGAS00001003266
SJERG020303_D1	B-ALL	DUX4	DUX4-high(IGV-noContig)	-135.115	52.0415	Unstranded_mRNA_PE100bp	Gu et al. Nature Genetics 2019	30643249	EGAS00001003266
SJBALL042271_D1	B-ALL	DUX4	DUX4-IGH	-131.781	52.616	Stranded_total_RNA_PE100bp	Gu et al. Nature Genetics 2019	30643249	EGAS00001003266
SJCOGALL010887_D2	B-ALL	DUX4	IGH-DUX4	-137.942	44.8747	Stranded_total_RNA_PE75bp	NA	NA	phs000218
SJBALL030379_D1	B-ALL	DUX4	DUX4-IGH	-140.771	40.6925	Stranded_total_RNA_PE125bp	this study	this study	EGAS00001004810
SJERG022_D	B-ALL	DUX4	IGH-DUX4	-137.251	45.8017	Stranded_total_RNA_PE100bp	Gu et al. Nature Genetics 2019	30643249	EGAS00001003266
SJALL049970_D1	B-ALL	DUX4	IGH-DUX4;CXCR4-DDX5;B2M-DDX5;IFIT2-PMAIP1	-128.118	54.6865	Stranded_total_RNA_PE100bp	Gu et al. Nature Genetics 2019	30643249	EGAS00001003266
SJERG014_D	B-ALL	DUX4	IGH-DUX4	-131.097	47.0521	Stranded_total_RNA_PE100bp	Gu et al. Nature Genetics 2019	30643249	EGAS00001003266
SJCOGALL010220_D3	B-ALL	DUX4	DUX4-IGH	-132.836	54.9846	Stranded_total_RNA_PE75bp	NA	NA	phs000218
SJBALL020609_D1	B-ALL	DUX4	IGH-DUX4	-132.642	52.3822	Unstranded_mRNA_PE100bp	Zhang et al. Nature Genetics 2016	27776115	EGAS00001001923
SJERG018_D	B-ALL	DUX4	DUX4-IGH	-133.513	41.5052	Stranded_total_RNA_PE100bp	Gu et al. Nature Genetics 2019	30643249	EGAS00001003266
SJBALL021514_D1	B-ALL	DUX4	DUX4-IGH	-128.342	51.585	Unstranded_mRNA_PE100bp	Zhang et al. Nature Genetics 2016	27776115	EGAS00001001923
SJBALL043686_D1	B-ALL	DUX4	IGH-DUX4(IGV)	-128.468	55.9595	Stranded_total_RNA_PE100bp	Gu et al. Nature Genetics 2019	30643249	EGAS00001003266
SJALL044303_D1	B-ALL	DUX4	IGH-DUX4(IGV)	-127.782	56.3868	Stranded_total_RNA_PE100bp	this study	this study	EGAS00001004810
SJALL016833_D1	B-ALL	DUX4	MIR4437-FRG2(DUX4)	-131.369	54.6105	Stranded_total_RNA_PE100bp	this study	this study	EGAS00001004810
SJBALL030663_D1	B-ALL	DUX4	IGH-DUX4	-128.996	45.1995	Stranded_total_RNA_PE125bp	this study	this study	EGAS00001004810
SJERG009_D	B-ALL	DUX4	IGH-DUX4	-126.271	49.4542	Stranded_total_RNA_PE100bp	Gu et al. Nature Genetics 2019	30643249	EGAS00001003266
SJBALL022430_D1	B-ALL	DUX4	IGH-SMOC2-DUX4	-128.542	46.4299	Stranded_total_RNA_PE100bp	Gu et al. Nature Genetics 2019	30643249	EGAS00001003266
SJALL054523_D1	B-ALL	DUX4	DUX4-IGH;SNU13-AC078927.1	-125.951	55.4613	Stranded_total_RNA_PE100bp	this study	this study	EGAS00001004810
SJERG028_D	B-ALL	DUX4	DUX4-IGH	-135.264	39.2086	Unstranded_mRNA_PE100bp	Gu et al. Nature Genetics 2019	30643249	EGAS00001003266
SJALL016808_D1	B-ALL	DUX4	IGH-DUX4	-138.183	48.7218	Stranded_total_RNA_PE100bp	this study	this study	EGAS00001004810
SJALL050012_D1	B-ALL	DUX4	IGH-DUX4	-129.245	53.4681	Stranded_total_RNA_PE100bp	Gu et al. Nature Genetics 2019	30643249	EGAS00001003266
SJALL054462_D1	B-ALL	DUX4	ITV	-126.921	53.5607	Stranded_total_RNA_PE100bp	Gu et al. Nature Genetics 2019	30643249	EGAS00001003266
SJERG031_D	B-ALL	DUX4	DUX4-IGH	-131.98	42.9763	Unstranded_mRNA_PE100bp	Gu et al. Nature Genetics 2019	30643249	EGAS00001003266
SJBALL022429_D1	B-ALL	DUX4	DUX4-IGH	-128.247	47.0626	Stranded_total_RNA_PE100bp	Gu et al. Nature Genetics 2019	30643249	EGAS00001003266
SJALL054483_D1	B-ALL	DUX4	IGH-DUX4	-124.393	53.9651	Stranded_total_RNA_PE100bp	Gu et al. Nature Genetics 2019	30643249	EGAS00001003266
SJBALL030762_D1	B-ALL	DUX4	DUX4-IGH	-140.01	41.5309	Stranded_total_RNA_PE125bp	this study	this study	EGAS00001004810
SJERG020052_D1	B-ALL	DUX4	IGH-DUX4	-135.573	53.9406	Unstranded_mRNA_PE100bp	Gu et al. Nature Genetics 2019	30643249	EGAS00001003266
SJBALL021492_D1	B-ALL	DUX4	DUX4-IGH	-134.086	52.2774	Unstranded_mRNA_PE100bp	Zhang et al. Nature Genetics 2016	27776115	EGAS00001001923
SJBALL020595_D1	B-ALL	DUX4	IGH-DUX4	-140.851	44.8029	Unstranded_mRNA_PE100bp	Zhang et al. Nature Genetics 2016	27776115	EGAS00001001923
SJBALL001621_D1	B-ALL	DUX4	DUX4-chr1(IGV)	-137.344	46.9196	Stranded_total_RNA_PE100bp	Gu et al. Nature Genetics 2019	30643249	EGAS00001003266
SJALL040099_D1	B-ALL	DUX4	DUX4-IGH	-132.971	51.4879	Stranded_total_RNA_PE100bp	Gu et al. Nature Genetics 2019	30643249	EGAS00001003266
SJALL049996_D1	B-ALL	DUX4	IGH-DUX4	-123.877	53.2821	Stranded_total_RNA_PE100bp	Gu et al. Nature Genetics 2019	30643249	EGAS00001003266
SJERG017_D	B-ALL	DUX4	IGH-DUX4	-131.233	45.5285	Stranded_total_RNA_PE100bp	Gu et al. Nature Genetics 2019	30643249	EGAS00001003266
SJBALL030170_D1	B-ALL	DUX4	IGH-DUX4	-123.655	51.9368	Stranded_total_RNA_PE125bp	this study	this study	EGAS00001004810
SJALL050864_D1	B-ALL	DUX4	IGH-DUX4	-125.347	53.5018	Stranded_total_RNA_PE100bp	Gu et al. Nature Genetics 2019	30643249	EGAS00001003266
SJBALL021427_D1	B-ALL	DUX4	IGH-DUX4	-140.134	46.3992	Unstranded_mRNA_PE100bp	Zhang et al. Nature Genetics 2016	27776115	EGAS00001001923
SJBALL020469_D1	B-ALL	DUX4	IGH-DUX4	-129.738	56.7779	Unstranded_mRNA_PE100bp	Zhang et al. Nature Genetics 2016	27776115	EGAS00001001923
SJERG020050_D1	B-ALL	DUX4	IGH-DUX4	-131.158	53.0605	Stranded_total_RNA_PE100bp	Gu et al. Nature Genetics 2019	30643249	EGAS00001003266
SJBALL021336_D1	B-ALL	DUX4	IGH-DUX4	-133.384	53.5741	Unstranded_mRNA_PE100bp	Zhang et al. Nature Genetics 2016	27776115	EGAS00001001923
SJBALL022611_D1	B-ALL	DUX4	IGH-DUX4	-140.216	51.6376	Unstranded_mRNA_PE75bp	Gu et al. Nature Genetics 2019	30643249	EGAS00001003266
SJERG002_D	B-ALL	DUX4	DUX4-IGH	-136.821	42.7408	Unstranded_mRNA_PE100bp	Gu et al. Nature Genetics 2019	30643249	EGAS00001003266
SJETV046_D	B-ALL	ETV6-RUNX1	ETV6-RUNX1	-144.729	-50.3857	Unstranded_mRNA_PE100bp	Gu et al. Nature Genetics 2019	30643249	EGAS00001003266
SJETV084_D	B-ALL	ETV6-RUNX1	ETV6-RUNX1	-143.342	-53.5214	Unstranded_mRNA_PE100bp	Gu et al. Nature Genetics 2019	30643249	EGAS00001003266
SJBALL043828_D1	B-ALL	ETV6-RUNX1	ETV6-RUNX1;RUNX1-RPAP3	-137.887	-40.3946	Stranded_total_RNA_PE100bp	this study	this study	EGAS00001004810
SJETV047_D	B-ALL	ETV6-RUNX1	ETV6-RUNX1	-144.317	-50.4254	Unstranded_mRNA_PE100bp	Gu et al. Nature Genetics 2019	30643249	EGAS00001003266
SJETV022_D	B-ALL	ETV6-RUNX1	ETV6-RUNX1;RUNX1-ZNF396	-144.058	-52.8218	Unstranded_mRNA_PE100bp	Gu et al. Nature Genetics 2019	30643249	EGAS00001003266
SJALL040086_D1	B-ALL	ETV6-RUNX1	ETV6-RUNX1	-140.869	-45.5973	Stranded_total_RNA_PE100bp	Gu et al. Nature Genetics 2019	30643249	EGAS00001003266
SJALL040067_D1	B-ALL	ETV6-RUNX1	ETV6-RUNX1;ZBTB44-ETV6	-140.006	-46.7914	Stranded_total_RNA_PE100bp	Gu et al. Nature Genetics 2019	30643249	EGAS00001003266
SJALL040084_D1	B-ALL	ETV6-RUNX1	ETV6-RUNX1	-136.179	-41.6954	Stranded_total_RNA_PE100bp	Gu et al. Nature Genetics 2019	30643249	EGAS00001003266
SJALL047519_D1	B-ALL	ETV6-RUNX1	ETV6-RUNX1;CNN2-COX7A1	-133.601	-47.1138	Stranded_total_RNA_PE100bp	this study	this study	EGAS00001004810
SJETV043_D	B-ALL	ETV6-RUNX1	ETV6-RUNX1	-146.29	-48.6674	Unstranded_mRNA_PE100bp	Gu et al. Nature Genetics 2019	30643249	EGAS00001003266
SJALL047542_D1	B-ALL	ETV6-RUNX1	ETV6-RUNX1;RUNX1-DYM	-138.576	-44.3949	Stranded_total_RNA_PE100bp	this study	this study	EGAS00001004810
SJETV076_D	B-ALL	ETV6-RUNX1	ETV6-RUNX1	-144.625	-51.783	Unstranded_mRNA_PE100bp	Gu et al. Nature Genetics 2019	30643249	EGAS00001003266
SJALL047534_D1	B-ALL	ETV6-RUNX1	ETV6-RUNX1	-137.274	-41.3766	Stranded_total_RNA_PE100bp	this study	this study	EGAS00001004810
SJBALL030726_D1	B-ALL	ETV6-RUNX1	ETV6-RUNX1	-132.076	-50.3959	Stranded_total_RNA_PE125bp	this study	this study	EGAS00001004810
SJETV021993_D1	B-ALL	ETV6-RUNX1	ETV6-RUNX1	-141.748	-48.161	Stranded_total_RNA_PE100bp	Gu et al. Nature Genetics 2019	30643249	EGAS00001003266
SJBALL002240_D1	B-ALL	ETV6-RUNX1	ETV6-RUNX1	-134.04	-45.3475	Stranded_total_RNA_PE100bp	Gu et al. Nature Genetics 2019	30643249	EGAS00001003266
SJALL040106_D1	B-ALL	ETV6-RUNX1	ETV6-RUNX1	-136.735	-52.8443	Stranded_total_RNA_PE100bp	Gu et al. Nature Genetics 2019	30643249	EGAS00001003266
SJBALL030786_D1	B-ALL	ETV6-RUNX1	ETV6-RUNX1	-132.096	-51.6952	Stranded_total_RNA_PE125bp	this study	this study	EGAS00001004810
SJALL040135_D1	B-ALL	ETV6-RUNX1	ETV6-RUNX1	-137.378	-45.4667	Stranded_total_RNA_PE100bp	Gu et al. Nature Genetics 2019	30643249	EGAS00001003266
SJETV083_D	B-ALL	ETV6-RUNX1	ETV6-RUNX1	-142.674	-50.6621	Unstranded_mRNA_PE100bp	Gu et al. Nature Genetics 2019	30643249	EGAS00001003266
SJALL040081_D1	B-ALL	ETV6-RUNX1	ETV6-RUNX1	-136.861	-50.6862	Stranded_total_RNA_PE100bp	Gu et al. Nature Genetics 2019	30643249	EGAS00001003266
SJETV004712_D2	B-ALL	ETV6-RUNX1	ETV6-RUNX1	-139.594	-45.2358	Stranded_total_RNA_PE100bp	Gu et al. Nature Genetics 2019	30643249	EGAS00001003266
SJBALL021187_D2	B-ALL	ETV6-RUNX1	ETV6-RUNX1	-142.992	-44.8617	Stranded_total_RNA_PE75bp	NA	NA	phs000218
SJALL015980_D1	B-ALL	ETV6-RUNX1	ETV6-RUNX1	-138.625	-42.1023	Stranded_total_RNA_PE100bp	Gu et al. Nature Genetics 2019	30643249	EGAS00001003266
SJBALL020663_D1	B-ALL	ETV6-RUNX1	ETV6-RUNX1	-137.639	-39.0479	Unstranded_mRNA_PE100bp	Gu et al. Nat Comm 2016	27824051	EGAS00001001952
SJALL040118_D1	B-ALL	ETV6-RUNX1	ETV6-RUNX1	-140.182	-50.1439	Stranded_total_RNA_PE100bp	Gu et al. Nature Genetics 2019	30643249	EGAS00001003266
SJETV022049_D1	B-ALL	ETV6-RUNX1	ETV6-RUNX1;PCNX-UBR1	-135.43	-53.8013	Stranded_total_RNA_PE100bp	Gu et al. Nature Genetics 2019	30643249	EGAS00001003266
SJALL040128_D1	B-ALL	ETV6-RUNX1	ETV6-RUNX1	-136.521	-49.4252	Stranded_total_RNA_PE100bp	Gu et al. Nature Genetics 2019	30643249	EGAS00001003266
SJBALL020690_D1	B-ALL	ETV6-RUNX1	ETV6-RUNX1	-130.744	-47.1325	Unstranded_mRNA_PE100bp	Gu et al. Nat Comm 2016	27824051	EGAS00001001952
SJALL040090_D1	B-ALL	ETV6-RUNX1	ETV6-RUNX1	-137.234	-53.4528	Stranded_total_RNA_PE100bp	Gu et al. Nature Genetics 2019	30643249	EGAS00001003266
SJETV004717_D2	B-ALL	ETV6-RUNX1	ETV6-RUNX1	-138.534	-42.9399	Stranded_total_RNA_PE100bp	Gu et al. Nature Genetics 2019	30643249	EGAS00001003266
SJETV021977_D1	B-ALL	ETV6-RUNX1	ETV6-RUNX1	-140.77	-46.5321	Stranded_total_RNA_PE100bp	Gu et al. Nature Genetics 2019	30643249	EGAS00001003266
SJBALL030541_D1	B-ALL	ETV6-RUNX1	ETV6-RUNX1	-140.893	-40.8221	Stranded_total_RNA_PE125bp	this study	this study	EGAS00001004810
SJETV020_D	B-ALL	ETV6-RUNX1	ETV6-RUNX1;IP6K1-ULK4	-137.25	-51.4697	Stranded_total_RNA_PE100bp	Gu et al. Nature Genetics 2019	30643249	EGAS00001003266
SJETV032_D	B-ALL	ETV6-RUNX1	ETV6-RUNX1;RUNX1-LINC01252	-142.755	-55.3085	Unstranded_mRNA_PE100bp	Gu et al. Nature Genetics 2019	30643249	EGAS00001003266
SJETV021948_D1	B-ALL	ETV6-RUNX1	RUNX1-ETV6;PAX5-ZCCHC7	-129.327	-51.9465	Stranded_total_RNA_PE100bp	Gu et al. Nature Genetics 2019	30643249	EGAS00001003266
SJALL040104_D1	B-ALL	ETV6-RUNX1	ETV6-RUNX1	-133.344	-49.7732	Stranded_total_RNA_PE100bp	Gu et al. Nature Genetics 2019	30643249	EGAS00001003266
SJALL040082_D1	B-ALL	ETV6-RUNX1	ETV6-RUNX1	-139.516	-47.296	Stranded_total_RNA_PE100bp	Gu et al. Nature Genetics 2019	30643249	EGAS00001003266
SJBALL030588_D1	B-ALL	ETV6-RUNX1	ETV6-RUNX1	-131.676	-52.5497	Stranded_total_RNA_PE125bp	this study	this study	EGAS00001004810
SJALL016676_D1	B-ALL	ETV6-RUNX1	ETV6-RUNX1;RUNX1-SS18	-134.013	-45.7276	Stranded_total_RNA_PE100bp	Gu et al. Nature Genetics 2019	30643249	EGAS00001003266
SJETV078_D	B-ALL	ETV6-RUNX1	ETV6-RUNX1	-144.933	-54.3835	Unstranded_mRNA_PE100bp	Gu et al. Nature Genetics 2019	30643249	EGAS00001003266
SJALL040077_D1	B-ALL	ETV6-RUNX1	ETV6-RUNX1	-137.696	-42.3582	Stranded_total_RNA_PE100bp	Gu et al. Nature Genetics 2019	30643249	EGAS00001003266
SJALL015983_D1	B-ALL	ETV6-RUNX1	ETV6-RUNX1	-135.195	-42.5734	Stranded_total_RNA_PE100bp	Gu et al. Nature Genetics 2019	30643249	EGAS00001003266
SJETV021945_D1	B-ALL	ETV6-RUNX1	ETV6-RUNX1	-144.099	-42.789	Stranded_total_RNA_PE100bp	Gu et al. Nature Genetics 2019	30643249	EGAS00001003266
SJALL057915_D1	B-ALL	ETV6-RUNX1	ETV6-RUNX1	-134.097	-39.2037	Stranded_total_RNA_PE100bp	this study	this study	EGAS00001004810
SJALL047529_D1	B-ALL	ETV6-RUNX1	ETV6-RUNX1	-138.177	-47.1543	Stranded_total_RNA_PE100bp	this study	this study	EGAS00001004810
SJALL040117_D1	B-ALL	ETV6-RUNX1	ETV6-RUNX1	-135.19	-52.6124	Stranded_total_RNA_PE100bp	Gu et al. Nature Genetics 2019	30643249	EGAS00001003266
SJBALL020583_D1	B-ALL	ETV6-RUNX1	ETV6-RUNX1	-128.433	-41.803	Unstranded_mRNA_PE100bp	Gu et al. Nat Comm 2016	27824051	EGAS00001001952
SJETV035_D	B-ALL	ETV6-RUNX1	ETV6-RUNX1	-137.097	-43.8781	Stranded_total_RNA_PE100bp	Gu et al. Nature Genetics 2019	30643249	EGAS00001003266
SJBALL020604_D1	B-ALL	ETV6-RUNX1	ETV6-RUNX1	-129.111	-41.8258	Unstranded_mRNA_PE100bp	Gu et al. Nat Comm 2016	27824051	EGAS00001001952
SJETV022019_D1	B-ALL	ETV6-RUNX1	ETV6-RUNX1	-137.784	-47.9406	Stranded_total_RNA_PE100bp	Gu et al. Nature Genetics 2019	30643249	EGAS00001003266
SJALL047515_D1	B-ALL	ETV6-RUNX1	ETV6-RUNX1	-135.017	-53.4824	Stranded_total_RNA_PE100bp	this study	this study	EGAS00001004810
SJCOGALL010885_D2	B-ALL	ETV6-RUNX1	ETV6-RUNX1	-130.938	-40.6993	Stranded_total_RNA_PE75bp	NA	NA	phs000218
SJBALL020619_D1	B-ALL	ETV6-RUNX1	ETV6-RUNX1	-127.569	-42.0174	Unstranded_mRNA_PE100bp	Gu et al. Nat Comm 2016	27824051	EGAS00001001952
SJETV041_D	B-ALL	ETV6-RUNX1	ETV6-RUNX1;RUNX1-TYMS	-142.243	-57.3125	Unstranded_mRNA_PE100bp	Gu et al. Nature Genetics 2019	30643249	EGAS00001003266
SJBALL020676_D1	B-ALL	ETV6-RUNX1	ETV6-RUNX1	-130.271	-43.1222	Unstranded_mRNA_PE100bp	Gu et al. Nature Genetics 2019	30643249	EGAS00001003266
SJBALL043817_D1	B-ALL	ETV6-RUNX1	ETV6-RUNX1	-134.153	-38.0303	Stranded_total_RNA_PE100bp	this study	this study	EGAS00001004810
SJETV015_D	B-ALL	ETV6-RUNX1	ETV6-RUNX1	-137.563	-49.5629	Stranded_total_RNA_PE100bp	Gu et al. Nature Genetics 2019	30643249	EGAS00001003266
SJETV096_D	B-ALL	ETV6-RUNX1	ETV6-RUNX1	-144.989	-48.3674	Unstranded_mRNA_PE100bp	Gu et al. Nature Genetics 2019	30643249	EGAS00001003266
SJALL047538_D1	B-ALL	ETV6-RUNX1	ETV6-RUNX1	-135.26	-37.8168	Stranded_total_RNA_PE100bp	this study	this study	EGAS00001004810
SJALL040068_D1	B-ALL	ETV6-RUNX1	ETV6-RUNX1	-134.533	-50.2367	Stranded_total_RNA_PE100bp	Gu et al. Nature Genetics 2019	30643249	EGAS00001003266
SJETV021953_D1	B-ALL	ETV6-RUNX1	ETV6-RUNX1	-139.869	-45.9507	Stranded_total_RNA_PE100bp	Gu et al. Nature Genetics 2019	30643249	EGAS00001003266
SJETV095_D	B-ALL	ETV6-RUNX1	ETV6-RUNX1	-144.508	-53.3039	Unstranded_mRNA_PE100bp	Gu et al. Nature Genetics 2019	30643249	EGAS00001003266
SJETV021967_D1	B-ALL	ETV6-RUNX1	ETV6-RUNX1	-137.953	-50.2625	Stranded_total_RNA_PE100bp	Gu et al. Nature Genetics 2019	30643249	EGAS00001003266
SJETV085_D	B-ALL	ETV6-RUNX1	ETV6-RUNX1;CD63-ETV6;RUNX1-ITGA7	-142.878	-56.5481	Unstranded_mRNA_PE100bp	Gu et al. Nature Genetics 2019	30643249	EGAS00001003266
SJALL014950_D1	B-ALL	ETV6-RUNX1	ETV6-RUNX1	-135.895	-42.7425	Stranded_total_RNA_PE100bp	Gu et al. Nature Genetics 2019	30643249	EGAS00001003266
SJALL047533_D1	B-ALL	ETV6-RUNX1	ETV6-RUNX1	-135.956	-47.3177	Stranded_total_RNA_PE100bp	this study	this study	EGAS00001004810
SJALL057912_D1	B-ALL	ETV6-RUNX1	ETV6-RUNX1;RUNX1-PPID	-134.64	-38.7904	Stranded_total_RNA_PE100bp	this study	this study	EGAS00001004810
SJETV010_D	B-ALL	ETV6-RUNX1	ETV6-RUNX1	-145.052	-47.0494	Unstranded_mRNA_PE100bp	Gu et al. Nature Genetics 2019	30643249	EGAS00001003266
SJETV001_D	B-ALL	ETV6-RUNX1	ETV6-RUNX1;MYO18B-KIAA1671	-138.117	-51.7859	Stranded_total_RNA_PE100bp	Gu et al. Nature Genetics 2019	30643249	EGAS00001003266
SJETV048_R	B-ALL	ETV6-RUNX1	ETV6-RUNX1;P2RY8-CRLF2;RUNX1-APOLD1;RUNX1-DDX47	-142.613	-51.4156	Unstranded_mRNA_PE100bp	Waanders et al. Blood Cancer Disc 2020	32793890	EGAS00001003975
SJBALL020687_D1	B-ALL	ETV6-RUNX1	ETV6-RUNX1	-129.569	-40.1256	Unstranded_mRNA_PE100bp	Gu et al. Nat Comm 2016	27824051	EGAS00001001952
SJETV018_D	B-ALL	ETV6-RUNX1	ETV6-RUNX1	-138.068	-49.4974	Stranded_total_RNA_PE100bp	Gu et al. Nature Genetics 2019	30643249	EGAS00001003266
SJETV021980_D1	B-ALL	ETV6-RUNX1	ETV6-RUNX1;RUNX1-APOLD1	-139.859	-42.2118	Stranded_total_RNA_PE100bp	Gu et al. Nature Genetics 2019	30643249	EGAS00001003266
SJALL016663_D1	B-ALL	ETV6-RUNX1	ETV6-RUNX1	-134.378	-48.7102	Stranded_total_RNA_PE100bp	Gu et al. Nature Genetics 2019	30643249	EGAS00001003266
SJALL016671_D1	B-ALL	ETV6-RUNX1	ETV6-RUNX1	-134.408	-44.3541	Stranded_total_RNA_PE100bp	Gu et al. Nature Genetics 2019	30643249	EGAS00001003266
SJETV098_D	B-ALL	ETV6-RUNX1	ETV6-RUNX1	-143.962	-49.1563	Unstranded_mRNA_PE100bp	Gu et al. Nature Genetics 2019	30643249	EGAS00001003266
SJALL047526_D1	B-ALL	ETV6-RUNX1	ETV6-RUNX1	-135.297	-39.8417	Stranded_total_RNA_PE100bp	this study	this study	EGAS00001004810
SJALL040059_D1	B-ALL	ETV6-RUNX1	ETV6-RUNX1	-141.206	-49.102	Stranded_total_RNA_PE100bp	Gu et al. Nature Genetics 2019	30643249	EGAS00001003266
SJETV059_D	B-ALL	ETV6-RUNX1	ETV6-RUNX1	-147.332	-51.3453	Unstranded_mRNA_PE100bp	Gu et al. Nature Genetics 2019	30643249	EGAS00001003266
SJETV022015_D1	B-ALL	ETV6-RUNX1	ETV6-RUNX1	-139.094	-52.1432	Stranded_total_RNA_PE100bp	Gu et al. Nature Genetics 2019	30643249	EGAS00001003266
SJALL057919_D1	B-ALL	ETV6-RUNX1	ETV6-RUNX1	-132.993	-39.1188	Stranded_total_RNA_PE100bp	this study	this study	EGAS00001004810
SJBALL020691_D1	B-ALL	ETV6-RUNX1	ETV6-RUNX1;FAM53B-THOC7	-129.899	-42.3153	Unstranded_mRNA_PE100bp	Gu et al. Nat Comm 2016	27824051	EGAS00001001952
SJETV022023_D1	B-ALL	ETV6-RUNX1	ETV6-RUNX1	-139.466	-43.4543	Stranded_total_RNA_PE100bp	Gu et al. Nature Genetics 2019	30643249	EGAS00001003266
SJETV021986_D1	B-ALL	ETV6-RUNX1	ETV6-RUNX1	-140.202	-51.4637	Stranded_total_RNA_PE100bp	Gu et al. Nature Genetics 2019	30643249	EGAS00001003266
SJALL047521_D1	B-ALL	ETV6-RUNX1	ETV6-RUNX1	-143.877	-41.9012	Stranded_total_RNA_PE100bp	this study	this study	EGAS00001004810
SJETV021981_D1	B-ALL	ETV6-RUNX1	ETV6-RUNX1	-141.438	-42.2215	Stranded_total_RNA_PE100bp	Gu et al. Nature Genetics 2019	30643249	EGAS00001003266
SJALL040123_D1	B-ALL	ETV6-RUNX1	ETV6-RUNX1	-133.49	-51.4593	Stranded_total_RNA_PE100bp	Gu et al. Nature Genetics 2019	30643249	EGAS00001003266
SJBALL020684_D1	B-ALL	ETV6-RUNX1	ETV6-RUNX1	-131.148	-47.2246	Unstranded_mRNA_PE100bp	Gu et al. Nat Comm 2016	27824051	EGAS00001001952
SJETV082_D	B-ALL	ETV6-RUNX1	ETV6-RUNX1;MYO18B-HORMAD2	-144.823	-46.5383	Unstranded_mRNA_PE100bp	Gu et al. Nature Genetics 2019	30643249	EGAS00001003266
SJBALL030331_D1	B-ALL	ETV6-RUNX1	ETV6-RUNX1	-139.249	-49.0553	Stranded_total_RNA_PE125bp	this study	this study	EGAS00001004810
SJETV021927_D1	B-ALL	ETV6-RUNX1	ETV6-RUNX1	-135.094	-55.2629	Stranded_total_RNA_PE100bp	Gu et al. Nature Genetics 2019	30643249	EGAS00001003266
SJALL047535_D1	B-ALL	ETV6-RUNX1	ETV6-RUNX1	-136.679	-44.3242	Stranded_total_RNA_PE100bp	this study	this study	EGAS00001004810
SJETV004_D	B-ALL	ETV6-RUNX1	ETV6-RUNX1	-141.435	-43.7198	Stranded_total_RNA_PE100bp	Gu et al. Nature Genetics 2019	30643249	EGAS00001003266
SJETV007_D	B-ALL	ETV6-RUNX1	ETV6-RUNX1	-138.351	-45.1014	Stranded_total_RNA_PE100bp	Gu et al. Nature Genetics 2019	30643249	EGAS00001003266
SJALL040057_D1	B-ALL	ETV6-RUNX1	ETV6-RUNX1	-133.759	-52.7932	Stranded_total_RNA_PE100bp	Gu et al. Nature Genetics 2019	30643249	EGAS00001003266
SJBALL031048_D1	B-ALL	ETV6-RUNX1	ETV6-RUNX1;RUNX1-SLC16A13	-140.049	-38.9261	Stranded_total_RNA_PE125bp	this study	this study	EGAS00001004810
SJETV070_D	B-ALL	ETV6-RUNX1	ETV6-RUNX1	-146.167	-50.9841	Unstranded_mRNA_PE100bp	Gu et al. Nature Genetics 2019	30643249	EGAS00001003266
SJALL048163_D1	B-ALL	ETV6-RUNX1	ETV6-RUNX1	-132.795	-39.9504	Stranded_total_RNA_PE100bp	this study	this study	EGAS00001004810
SJBALL020653_D1	B-ALL	ETV6-RUNX1	ETV6-RUNX1	-131.239	-45.6026	Unstranded_mRNA_PE100bp	Gu et al. Nat Comm 2016	27824051	EGAS00001001952
SJETV021942_D1	B-ALL	ETV6-RUNX1	ETV6-RUNX1	-140.608	-44.6433	Stranded_total_RNA_PE100bp	Gu et al. Nature Genetics 2019	30643249	EGAS00001003266
SJBALL030034_D1	B-ALL	ETV6-RUNX1	ETV6-RUNX1	-142.036	-46.3099	Stranded_total_RNA_PE125bp	this study	this study	EGAS00001004810
SJBALL043678_D1	B-ALL	HLF	TCF3-HLF	23.6315	5.4135	Stranded_total_RNA_PE100bp	Gu et al. Nature Genetics 2019	30643249	EGAS00001003266
SJBALL021170_D2	B-ALL	HLF	TCF3-HLF	40.0646	-14.074	Stranded_total_RNA_PE75bp	NA	NA	phs000218
SJBALL022482_D1	B-ALL	HLF	TCF3-HLF	41.3364	-14.251	Stranded_total_RNA_PE100bp	Gu et al. Nature Genetics 2019	30643249	EGAS00001003266
SJALL049969_D1	B-ALL	HLF	TCF3-HLF	23.6702	6.12827	Stranded_total_RNA_PE100bp	Gu et al. Nature Genetics 2019	30643249	EGAS00001003266
SJBALL030404_D1	B-ALL	HLF	TCF3-HLF	41.3224	-15.3225	Stranded_total_RNA_PE125bp	this study	this study	EGAS00001004810
SJALL049943_D1	B-ALL	HLF	TCF3-HLF;IGH-TCF3	40.1836	-15.4158	Stranded_total_RNA_PE100bp	Gu et al. Nature Genetics 2019	30643249	EGAS00001003266
SJBALL079_D	B-ALL	HLF	TCF3-HLF	41.1334	-14.7528	Stranded_total_RNA_PE100bp	Gu et al. Nature Genetics 2019	30643249	EGAS00001003266
SJBALL021188_D2	B-ALL	HLF	TCF3-HLF	39.8783	-15.9326	Stranded_total_RNA_PE75bp	NA	NA	phs000218
SJALL050004_D1	B-ALL	Hyperdiploid	NoFusion	-64.7087	-84.6227	Stranded_total_RNA_PE100bp	Gu et al. Nature Genetics 2019	30643249	EGAS00001003266
SJALL054755_D1	B-ALL	Hyperdiploid	NoFusion	-73.9942	-89.0108	Stranded_total_RNA_PE100bp	this study	this study	EGAS00001004810
SJALL055648_D1	B-ALL	Hyperdiploid	NoFusion	-62.3507	-97.3074	Stranded_total_RNA_PE100bp	this study	this study	EGAS00001004810
SJALL054515_D1	B-ALL	Hyperdiploid	NoFusion	-58.6895	-91.3776	Stranded_total_RNA_PE100bp	Gu et al. Nature Genetics 2019	30643249	EGAS00001003266
SJALL016654_D1	B-ALL	Hyperdiploid	NoFusion	-69.3628	-87.5635	Stranded_total_RNA_PE100bp	Gu et al. Nature Genetics 2019	30643249	EGAS00001003266
SJBALL020920_D1	B-ALL	Hyperdiploid	NoFusion	-63.688	-97.6866	Unstranded_mRNA_PE100bp	Gu et al. Nat Comm 2016	27824051	EGAS00001001952
SJBALL020632_D1	B-ALL	Hyperdiploid	NoFusion	-66.2219	-95.4445	Unstranded_mRNA_PE100bp	Gu et al. Nat Comm 2016	27824051	EGAS00001001952
SJALL047513_D1	B-ALL	Hyperdiploid	NoFusion	-57.623	-91.4153	Stranded_total_RNA_PE100bp	this study	this study	EGAS00001004810
SJBALL020916_D1	B-ALL	Hyperdiploid	NoFusion	-66.8629	-97.3013	Unstranded_mRNA_PE100bp	Gu et al. Nat Comm 2016	27824051	EGAS00001001952
SJHYPER011_D	B-ALL	Hyperdiploid	NoFusion	-65.8346	-85.1955	Stranded_total_RNA_PE100bp	Gu et al. Nature Genetics 2019	30643249	EGAS00001003266
SJALL050881_D1	B-ALL	Hyperdiploid	NoFusion	-64.98	-89.085	Stranded_total_RNA_PE100bp	Gu et al. Nature Genetics 2019	30643249	EGAS00001003266
SJBALL020697_D1	B-ALL	Hyperdiploid	NoFusion	-54.1306	-94.0154	Unstranded_mRNA_PE100bp	Gu et al. Nat Comm 2016	27824051	EGAS00001001952
SJBALL030349_D1	B-ALL	Hyperdiploid	NoFusion	-79.1781	-79.3481	Stranded_total_RNA_PE125bp	this study	this study	EGAS00001004810
SJALL050840_D1	B-ALL	Hyperdiploid	CREBBP-SLX4	-70.0061	-89.2692	Stranded_total_RNA_PE100bp	Gu et al. Nature Genetics 2019	30643249	EGAS00001003266
SJALL048164_D1	B-ALL	Hyperdiploid	NoFusion	-72.038	-92.0897	Stranded_total_RNA_PE100bp	this study	this study	EGAS00001004810
SJETV036_D	B-ALL	Hyperdiploid	NoFusion	-76.2126	-88.4984	Unstranded_mRNA_PE100bp	Gu et al. Nature Genetics 2019	30643249	EGAS00001003266
SJHYPER005316_D2	B-ALL	Hyperdiploid	NoFusion	-74.5841	-85.1202	Stranded_total_RNA_PE100bp	Gu et al. Nature Genetics 2019	30643249	EGAS00001003266
SJHYPER084_D	B-ALL	Hyperdiploid	NoFusion	-72.912	-87.7247	Stranded_total_RNA_PE100bp	Gu et al. Nature Genetics 2019	30643249	EGAS00001003266
SJHYPER021984_D1	B-ALL	Hyperdiploid	NoFusion	-76.7558	-86.6733	Stranded_total_RNA_PE100bp	Gu et al. Nature Genetics 2019	30643249	EGAS00001003266
SJBALL030491_D1	B-ALL	Hyperdiploid	NoFusion	-83.3209	-81.028	Stranded_total_RNA_PE125bp	this study	this study	EGAS00001004810
SJBALL013356_D1	B-ALL	Hyperdiploid	NoFusion	-63.0346	-99.2965	Unstranded_mRNA_PE100bp	Gu et al. Nat Comm 2016	27824051	EGAS00001001952
SJALL040116_D1	B-ALL	Hyperdiploid	NoFusion	-70.535	-87.3094	Stranded_total_RNA_PE100bp	Gu et al. Nature Genetics 2019	30643249	EGAS00001003266
SJHYPER005304_D2	B-ALL	Hyperdiploid	NoFusion	-77.5095	-87.0257	Stranded_total_RNA_PE100bp	Gu et al. Nature Genetics 2019	30643249	EGAS00001003266
SJBALL020871_D1	B-ALL	Hyperdiploid	NoFusion	-70.7902	-94.276	Unstranded_mRNA_PE100bp	Gu et al. Nat Comm 2016	27824051	EGAS00001001952
SJBALL020875_D1	B-ALL	Hyperdiploid	NoFusion	-68.1598	-97.474	Unstranded_mRNA_PE100bp	Gu et al. Nat Comm 2016	27824051	EGAS00001001952
SJBALL020815_D1	B-ALL	Hyperdiploid	NoFusion	-66.3794	-98.2168	Unstranded_mRNA_PE100bp	Gu et al. Nat Comm 2016	27824051	EGAS00001001952
SJALL015972_D1	B-ALL	Hyperdiploid	NoFusion	-66.9727	-87.5017	Stranded_total_RNA_PE100bp	Gu et al. Nature Genetics 2019	30643249	EGAS00001003266
SJHYPER021961_D1	B-ALL	Hyperdiploid	NoFusion	-82.236	-86.8358	Stranded_total_RNA_PE100bp	Gu et al. Nature Genetics 2019	30643249	EGAS00001003266
SJALL050876_D1	B-ALL	Hyperdiploid	NoFusion	-74.8282	-86.6419	Stranded_total_RNA_PE100bp	Gu et al. Nature Genetics 2019	30643249	EGAS00001003266
SJINF067_D	B-ALL	Hyperdiploid	NoFusion	-75.9924	-82.8463	Unstranded_mRNA_PE100bp	Gu et al. Nature Genetics 2019	30643249	EGAS00001003266
SJHYPER014_D	B-ALL	Hyperdiploid	NoFusion	-81.5363	-87.3063	Stranded_total_RNA_PE100bp	Gu et al. Nature Genetics 2019	30643249	EGAS00001003266
SJBALL020800_D1	B-ALL	Hyperdiploid	NoFusion	-64.4342	-96.9267	Unstranded_mRNA_PE100bp	Gu et al. Nat Comm 2016	27824051	EGAS00001001952
SJALL040085_D1	B-ALL	Hyperdiploid	NoFusion	-80.8663	-86.0185	Stranded_total_RNA_PE100bp	Gu et al. Nature Genetics 2019	30643249	EGAS00001003266
SJHYPER023_D	B-ALL	Hyperdiploid	NAV1-LGR6	-55.7514	-95.8253	Stranded_total_RNA_PE100bp	Gu et al. Nature Genetics 2019	30643249	EGAS00001003266
SJHYPER150_D	B-ALL	Hyperdiploid	NoFusion	-56.5799	-95.7415	Stranded_total_RNA_PE100bp	Gu et al. Nature Genetics 2019	30643249	EGAS00001003266
SJHYPER022016_D1	B-ALL	Hyperdiploid	NoFusion	-78.3127	-84.5106	Stranded_total_RNA_PE100bp	Gu et al. Nature Genetics 2019	30643249	EGAS00001003266
SJALL043829_D1	B-ALL	Hyperdiploid	NoFusion	-69.4621	-85.3637	Stranded_total_RNA_PE100bp	this study	this study	EGAS00001004810
SJBALL020015_D1	B-ALL	Hyperdiploid	NoFusion	-59.3785	-95.7671	Unstranded_mRNA_PE100bp	Roberts et al. NEJM 2014	25207766	EGAS00001000654
SJHYPER021954_D1	B-ALL	Hyperdiploid	NoFusion	-79.3476	-82.1333	Stranded_total_RNA_PE100bp	Gu et al. Nature Genetics 2019	30643249	EGAS00001003266
SJHYPER022027_D1	B-ALL	Hyperdiploid	NoFusion	-80.0712	-88.2371	Stranded_total_RNA_PE100bp	Gu et al. Nature Genetics 2019	30643249	EGAS00001003266
SJALL016675_D1	B-ALL	Hyperdiploid	NoFusion	-66.4699	-85.9978	Stranded_total_RNA_PE100bp	Gu et al. Nature Genetics 2019	30643249	EGAS00001003266
SJALL040088_D1	B-ALL	Hyperdiploid	NoFusion	-59.8088	-92.7416	Stranded_total_RNA_PE100bp	Gu et al. Nature Genetics 2019	30643249	EGAS00001003266
SJALL047531_D1	B-ALL	Hyperdiploid	NoFusion	-69.5875	-86.5135	Stranded_total_RNA_PE100bp	this study	this study	EGAS00001004810
SJHYPER137_D	B-ALL	Hyperdiploid	NoFusion	-56.5348	-93.2164	Stranded_total_RNA_PE100bp	Gu et al. Nature Genetics 2019	30643249	EGAS00001003266
SJALL040126_D1	B-ALL	Hyperdiploid	NoFusion	-72.1938	-80.6174	Stranded_total_RNA_PE100bp	Gu et al. Nature Genetics 2019	30643249	EGAS00001003266
SJHYPER141_D	B-ALL	Hyperdiploid	NoFusion	-67.6785	-85.021	Stranded_total_RNA_PE100bp	Gu et al. Nature Genetics 2019	30643249	EGAS00001003266
SJBALL020158_D1	B-ALL	Hyperdiploid	IKZF1-ISPD	-64.1435	-83.4523	Stranded_total_RNA_PE100bp	Gu et al. Nature Genetics 2019	30643249	EGAS00001003266
SJHYPER021935_D1	B-ALL	Hyperdiploid	NoFusion	-71.6998	-79.8875	Stranded_total_RNA_PE100bp	Gu et al. Nature Genetics 2019	30643249	EGAS00001003266
SJALL043827_D1	B-ALL	Hyperdiploid	NoFusion	-69.4064	-93.4172	Stranded_total_RNA_PE100bp	this study	this study	EGAS00001004810
SJHYPER019_D	B-ALL	Hyperdiploid	NoFusion	-76.5497	-91.9519	Stranded_total_RNA_PE100bp	Gu et al. Nature Genetics 2019	30643249	EGAS00001003266
SJALL040124_D1	B-ALL	Hyperdiploid	NoFusion	-79.0233	-83.3391	Stranded_total_RNA_PE100bp	Gu et al. Nature Genetics 2019	30643249	EGAS00001003266
SJALL057926_D1	B-ALL	Hyperdiploid	NoFusion	-72.2313	-85.9236	Stranded_total_RNA_PE100bp	this study	this study	EGAS00001004810
SJHYPER005320_D2	B-ALL	Hyperdiploid	NoFusion	-76.2362	-86.0003	Stranded_total_RNA_PE100bp	Gu et al. Nature Genetics 2019	30643249	EGAS00001003266
SJHYPER017_D	B-ALL	Hyperdiploid	NoFusion	-77.4928	-82.4922	Stranded_total_RNA_PE100bp	Gu et al. Nature Genetics 2019	30643249	EGAS00001003266
SJHYPER022034_D1	B-ALL	Hyperdiploid	NoFusion	-81.4667	-88.928	Stranded_total_RNA_PE100bp	Gu et al. Nature Genetics 2019	30643249	EGAS00001003266
SJHYPER117_D	B-ALL	Hyperdiploid	NoFusion	-74.4012	-83.7735	Stranded_total_RNA_PE100bp	Gu et al. Nature Genetics 2019	30643249	EGAS00001003266
SJBALL020167_D1	B-ALL	Hyperdiploid	NoFusion	-70.5412	-92.473	Stranded_total_RNA_PE100bp	Gu et al. Nature Genetics 2019	30643249	EGAS00001003266
SJALL040100_D1	B-ALL	Hyperdiploid	NoFusion	-70.4903	-90.8858	Stranded_total_RNA_PE100bp	Gu et al. Nature Genetics 2019	30643249	EGAS00001003266
SJHYPER096_D	B-ALL	Hyperdiploid	NoFusion	-76.3418	-85.4568	Stranded_total_RNA_PE100bp	Gu et al. Nature Genetics 2019	30643249	EGAS00001003266
SJHYPER111_D	B-ALL	Hyperdiploid	NoFusion	-78.8099	-87.4567	Stranded_total_RNA_PE100bp	Gu et al. Nature Genetics 2019	30643249	EGAS00001003266
SJALL015619_D1	B-ALL	Hyperdiploid	NoFusion	-62.3598	-96.6036	Stranded_total_RNA_PE100bp	Gu et al. Nature Genetics 2019	30643249	EGAS00001003266
SJBALL020634_D1	B-ALL	Hyperdiploid	NoFusion	-64.0339	-99.1052	Unstranded_mRNA_PE100bp	Gu et al. Nat Comm 2016	27824051	EGAS00001001952
SJBALL015082_D1	B-ALL	Hyperdiploid	NoFusion	-61.8796	-87.5171	Stranded_total_RNA_PE100bp	Gu et al. Nature Genetics 2019	30643249	EGAS00001003266
SJCOGALL010860_D2	B-ALL	Hyperdiploid	IGK-IL3RA(CRLF2)	-68.4249	-86.8156	Stranded_total_RNA_PE75bp	NA	NA	phs000218
SJALL047532_D1	B-ALL	Hyperdiploid	NoFusion	-78.5931	-92.6666	Stranded_total_RNA_PE100bp	this study	this study	EGAS00001004810
SJALL050855_D1	B-ALL	Hyperdiploid	RUNX1-SNX14	-72.9555	-83.9153	Stranded_total_RNA_PE100bp	Gu et al. Nature Genetics 2019	30643249	EGAS00001003266
SJHYPER021999_D1	B-ALL	Hyperdiploid	NoFusion	-76.8444	-92.5935	Stranded_total_RNA_PE100bp	Gu et al. Nature Genetics 2019	30643249	EGAS00001003266
SJHYPER057_D	B-ALL	Hyperdiploid	NoFusion	-79.7712	-86.1956	Stranded_total_RNA_PE100bp	Gu et al. Nature Genetics 2019	30643249	EGAS00001003266
SJHYPER069_D	B-ALL	Hyperdiploid	NoFusion	-78.681	-85.2504	Stranded_total_RNA_PE100bp	Gu et al. Nature Genetics 2019	30643249	EGAS00001003266
SJCOGALL010886_R2	B-ALL	Hyperdiploid	NoFusion	-71.0257	-89.0931	Stranded_total_RNA_PE75bp	NA	NA	TARGET ALL Phase 2
SJBALL020993_D1	B-ALL	Hyperdiploid	NoFusion	-54.6491	-93.6013	Unstranded_mRNA_PE100bp	Gu et al. Nat Comm 2016	27824051	EGAS00001001952
SJHYPER103_D	B-ALL	Hyperdiploid	NoFusion	-82.5301	-86.0546	Stranded_total_RNA_PE100bp	Gu et al. Nature Genetics 2019	30643249	EGAS00001003266
SJHYPER123_D	B-ALL	Hyperdiploid	NoFusion	-80.6858	-87.1171	Stranded_total_RNA_PE100bp	Gu et al. Nature Genetics 2019	30643249	EGAS00001003266
SJBALL041747_D1	B-ALL	Hyperdiploid	NoFusion	-68.6376	-100.445	Stranded_total_RNA_PE100bp	Gu et al. Nature Genetics 2019	30643249	EGAS00001003266
SJBALL020672_D1	B-ALL	Hyperdiploid	NoFusion	-65.3105	-97.7343	Unstranded_mRNA_PE100bp	Gu et al. Nature Genetics 2019	30643249	EGAS00001003266
SJBALL031073_D1	B-ALL	Hyperdiploid	NoFusion	-69.1654	-82.8907	Stranded_total_RNA_PE125bp	this study	this study	EGAS00001004810
SJHYPER116_D	B-ALL	Hyperdiploid	NoFusion	-75.3333	-85.0763	Stranded_total_RNA_PE100bp	Gu et al. Nature Genetics 2019	30643249	EGAS00001003266
SJBALL020641_D1	B-ALL	Hyperdiploid	NoFusion	-68.5586	-95.9798	Unstranded_mRNA_PE100bp	Gu et al. Nat Comm 2016	27824051	EGAS00001001952
SJHYPER102_D	B-ALL	Hyperdiploid	NoFusion	-80.0861	-93.2255	Stranded_total_RNA_PE100bp	Gu et al. Nature Genetics 2019	30643249	EGAS00001003266
SJALL040087_D1	B-ALL	Hyperdiploid	NoFusion	-79.5473	-85.0661	Stranded_total_RNA_PE100bp	Gu et al. Nature Genetics 2019	30643249	EGAS00001003266
SJBALL030040_D1	B-ALL	Hyperdiploid	NoFusion	-84.8372	-85.753	Stranded_total_RNA_PE125bp	this study	this study	EGAS00001004810
SJBALL020852_D1	B-ALL	Hyperdiploid	NoFusion	-56.624	-92.0798	Stranded_total_RNA_PE100bp	Roberts et al. NEJM 2014	25207766	EGAS00001000654
SJBALL020656_D1	B-ALL	Hyperdiploid	NoFusion	-67.9383	-99.4233	Unstranded_mRNA_PE100bp	Gu et al. Nat Comm 2016	27824051	EGAS00001001952
SJHYPER108_D	B-ALL	Hyperdiploid	PAG1-PTK2B	-73.0287	-81.3291	Stranded_total_RNA_PE100bp	Gu et al. Nature Genetics 2019	30643249	EGAS00001003266
SJBALL030618_D1	B-ALL	Hyperdiploid	NoFusion	-68.3942	-80.5989	Stranded_total_RNA_PE125bp	this study	this study	EGAS00001004810
SJBALL030103_D1	B-ALL	Hyperdiploid	NoFusion	-82.0761	-82.4151	Stranded_total_RNA_PE125bp	this study	this study	EGAS00001004810
SJBALL016269_D1	B-ALL	Hyperdiploid	NoFusion	-72.5441	-88.509	Stranded_total_RNA_PE100bp	Gu et al. Nat Comm 2016	27824051	EGAS00001001952
SJALL040136_D1	B-ALL	Hyperdiploid	NoFusion	-70.1355	-90.1014	Stranded_total_RNA_PE100bp	Gu et al. Nature Genetics 2019	30643249	EGAS00001003266
SJBALL016276_D1	B-ALL	Hyperdiploid	NoFusion	-64.0078	-101.552	Stranded_total_RNA_PE100bp	Gu et al. Nat Comm 2016	27824051	EGAS00001001952
SJBALL016263_D1	B-ALL	Hyperdiploid	NoFusion	-64.2247	-91.9934	Stranded_total_RNA_PE100bp	Gu et al. Nat Comm 2016	27824051	EGAS00001001952
SJALL040110_D1	B-ALL	Hyperdiploid	NoFusion	-78.0328	-89.9416	Stranded_total_RNA_PE100bp	Gu et al. Nature Genetics 2019	30643249	EGAS00001003266
SJHYPER095_D	B-ALL	Hyperdiploid	NoFusion	-79.4163	-88.7963	Stranded_total_RNA_PE100bp	Gu et al. Nature Genetics 2019	30643249	EGAS00001003266
SJALL016843_D1	B-ALL	Hyperdiploid	NoFusion	-57.8739	-92.7586	Stranded_total_RNA_PE100bp	this study	this study	EGAS00001004810
SJCOGALL010911_R2	B-ALL	Hyperdiploid	NoFusion	-71.5708	-87.7155	Stranded_total_RNA_PE75bp	NA	NA	TARGET ALL Phase 2
SJALL050845_D1	B-ALL	Hyperdiploid	NoFusion	-65.0773	-87.8555	Stranded_total_RNA_PE100bp	Gu et al. Nature Genetics 2019	30643249	EGAS00001003266
SJBALL021525_D2	B-ALL	Hyperdiploid	NoFusion	-71.4889	-99.765	Stranded_total_RNA_PE75bp	NA	NA	phs000218
SJHYPER052_D	B-ALL	Hyperdiploid	NoFusion	-76.6381	-84.359	Stranded_total_RNA_PE100bp	Gu et al. Nature Genetics 2019	30643249	EGAS00001003266
SJBALL021803_D1	B-ALL	Hyperdiploid	NoFusion	-68.5879	-94.9958	Unstranded_mRNA_PE100bp	Gu et al. Nat Comm 2016	27824051	EGAS00001001952
SJBALL022477_D1	B-ALL	Hyperdiploid	NoFusion	-72.4839	-81.5325	Stranded_total_RNA_PE100bp	Gu et al. Nature Genetics 2019	30643249	EGAS00001003266
SJBALL030821_D1	B-ALL	Hyperdiploid	NoFusion	-82.6935	-83.7432	Stranded_total_RNA_PE125bp	this study	this study	EGAS00001004810
SJHYPER021_D	B-ALL	Hyperdiploid	NoFusion	-54.885	-98.9476	Unstranded_mRNA_PE100bp	Roberts et al. NEJM 2014	25207766	EGAS00001000654
SJBALL030258_D1	B-ALL	Hyperdiploid	NoFusion	-84.3748	-84.1528	Stranded_total_RNA_PE125bp	this study	this study	EGAS00001004810
SJBALL020520_D2	B-ALL	Hyperdiploid	NoFusion	-70.7742	-99.0622	Stranded_total_RNA_PE75bp	NA	NA	phs000218
SJHYPER005318_D2	B-ALL	Hyperdiploid	NoFusion	-80.5387	-89.9086	Stranded_total_RNA_PE100bp	Gu et al. Nature Genetics 2019	30643249	EGAS00001003266
SJBALL020803_D1	B-ALL	Hyperdiploid	NoFusion	-64.4596	-96.1312	Unstranded_mRNA_PE100bp	Gu et al. Nat Comm 2016	27824051	EGAS00001001952
SJALL040095_D1	B-ALL	Hyperdiploid	NoFusion	-69.6113	-91.2276	Stranded_total_RNA_PE100bp	Gu et al. Nature Genetics 2019	30643249	EGAS00001003266
SJHYPER113_D	B-ALL	Hyperdiploid	NoFusion	-78.7748	-86.5816	Stranded_total_RNA_PE100bp	Gu et al. Nature Genetics 2019	30643249	EGAS00001003266
SJBALL030384_D1	B-ALL	Hyperdiploid	NoFusion	-67.0414	-81.4913	Stranded_total_RNA_PE125bp	this study	this study	EGAS00001004810
SJALL050842_D1	B-ALL	Hyperdiploid	NoFusion	-73.838	-86.1975	Stranded_total_RNA_PE100bp	Gu et al. Nature Genetics 2019	30643249	EGAS00001003266
SJBALL030832_D1	B-ALL	Hyperdiploid	NoFusion	-67.0458	-82.636	Stranded_total_RNA_PE125bp	this study	this study	EGAS00001004810
SJHYPER051_D	B-ALL	Hyperdiploid	NoFusion	-81.9636	-91.6138	Stranded_total_RNA_PE100bp	Gu et al. Nature Genetics 2019	30643249	EGAS00001003266
SJBALL020668_D1	B-ALL	Hyperdiploid	NoFusion	-66.6339	-98.7683	Unstranded_mRNA_PE100bp	Gu et al. Nature Genetics 2019	30643249	EGAS00001003266
SJALL047510_D1	B-ALL	Hyperdiploid	NoFusion	-80.3261	-84.4774	Stranded_total_RNA_PE100bp	this study	this study	EGAS00001004810
SJBALL021240_D2	B-ALL	Hyperdiploid	NoFusion	-71.7758	-94.7202	Stranded_total_RNA_PE75bp	NA	NA	phs000218
SJBALL030574_D1	B-ALL	Hyperdiploid	NoFusion	-84.8051	-85.0585	Stranded_total_RNA_PE125bp	this study	this study	EGAS00001004810
SJBALL021820_D1	B-ALL	Hyperdiploid	IL3RA(CRLF2)-IGH	-63.3371	-93.776	Unstranded_mRNA_PE100bp	Gu et al. Nat Comm 2016	27824051	EGAS00001001952
SJBALL041748_D1	B-ALL	Hyperdiploid	NoFusion	-75.5465	-90.0185	Stranded_total_RNA_PE100bp	Gu et al. Nature Genetics 2019	30643249	EGAS00001003266
SJCOGALL010879_R2	B-ALL	Hyperdiploid	NoFusion	-69.8679	-96.5422	Stranded_total_RNA_PE75bp	NA	NA	TARGET ALL Phase 2
SJALL050851_D1	B-ALL	Hyperdiploid	NoFusion	-58.7212	-92.8713	Stranded_total_RNA_PE100bp	Gu et al. Nature Genetics 2019	30643249	EGAS00001003266
SJHYPER021970_D1	B-ALL	Hyperdiploid	NoFusion	-79.0245	-92.484	Stranded_total_RNA_PE100bp	Gu et al. Nature Genetics 2019	30643249	EGAS00001003266
SJHYPER021946_D1	B-ALL	Hyperdiploid	NoFusion	-65.3796	-90	Stranded_total_RNA_PE100bp	Gu et al. Nature Genetics 2019	30643249	EGAS00001003266
SJBALL030290_D1	B-ALL	Hyperdiploid	NoFusion	-83.949	-82.7275	Stranded_total_RNA_PE125bp	this study	this study	EGAS00001004810
SJBALL020702_D1	B-ALL	Hyperdiploid	NoFusion	-67.2286	-96.3544	Unstranded_mRNA_PE100bp	Gu et al. Nature Genetics 2019	30643249	EGAS00001003266
SJHYPER146_D	B-ALL	Hyperdiploid	NoFusion	-65.7071	-93.4599	Unstranded_mRNA_PE100bp	Roberts et al. NEJM 2014	25207766	EGAS00001000654
SJHYPER012_D	B-ALL	Hyperdiploid	NoFusion	-66.8176	-88.5956	Stranded_total_RNA_PE100bp	Gu et al. Nature Genetics 2019	30643249	EGAS00001003266
SJALL040131_D1	B-ALL	Hyperdiploid	NoFusion	-71.6219	-90.8737	Stranded_total_RNA_PE100bp	Gu et al. Nature Genetics 2019	30643249	EGAS00001003266
SJBALL030282_D1	B-ALL	Hyperdiploid	NoFusion	-80.939	-81.2764	Stranded_total_RNA_PE125bp	this study	this study	EGAS00001004810
SJHYPER022045_D1	B-ALL	Hyperdiploid	NoFusion	-83.0823	-88.5949	Stranded_total_RNA_PE100bp	Gu et al. Nature Genetics 2019	30643249	EGAS00001003266
SJCOGALL010920_R2	B-ALL	Hyperdiploid	NoFusion	-72.5305	-95.0096	Stranded_total_RNA_PE75bp	NA	NA	TARGET ALL Phase 2
SJBALL020339_D2	B-ALL	Hyperdiploid	NoFusion	-71.3587	-98.9473	Stranded_total_RNA_PE75bp	NA	NA	phs000218
SJBALL030413_D1	B-ALL	Hyperdiploid	NoFusion	-62.8717	-90.1082	Stranded_total_RNA_PE125bp	this study	this study	EGAS00001004810
SJBALL020698_D1	B-ALL	Hyperdiploid	NoFusion	-63.8392	-95.7378	Unstranded_mRNA_PE100bp	Gu et al. Nat Comm 2016	27824051	EGAS00001001952
SJBALL030533_D1	B-ALL	Hyperdiploid	NoFusion	-63.9375	-89.0141	Stranded_total_RNA_PE125bp	this study	this study	EGAS00001004810
SJHYPER097_D	B-ALL	Hyperdiploid	NoFusion	-76.7974	-81.2624	Stranded_total_RNA_PE100bp	Gu et al. Nature Genetics 2019	30643249	EGAS00001003266
SJE2A056_D	B-ALL	Hyperdiploid	NoFusion	-56.612	-97.7058	Unstranded_mRNA_PE100bp	Gu et al. Nature Genetics 2019	30643249	EGAS00001003266
SJALL050828_D1	B-ALL	Hyperdiploid	NoFusion	-76.1967	-87.3574	Stranded_total_RNA_PE100bp	Gu et al. Nature Genetics 2019	30643249	EGAS00001003266
SJALL050843_D1	B-ALL	Hyperdiploid	NoFusion	-60.9522	-90.3075	Stranded_total_RNA_PE100bp	Gu et al. Nature Genetics 2019	30643249	EGAS00001003266
SJALL050846_D1	B-ALL	Hyperdiploid	NoFusion	-66.1044	-87.702	Stranded_total_RNA_PE100bp	Gu et al. Nature Genetics 2019	30643249	EGAS00001003266
SJBALL020647_D1	B-ALL	Hyperdiploid	NoFusion	-57.1934	-97.9576	Unstranded_mRNA_PE100bp	Gu et al. Nat Comm 2016	27824051	EGAS00001001952
SJBALL016255_D1	B-ALL	Hyperdiploid	NoFusion	-64.1565	-85.848	Stranded_total_RNA_PE100bp	Gu et al. Nat Comm 2016	27824051	EGAS00001001952
SJALL048154_D1	B-ALL	Hyperdiploid	NoFusion	-72.8373	-91.7488	Stranded_total_RNA_PE100bp	this study	this study	EGAS00001004810
SJHYPER120_D	B-ALL	Hyperdiploid	NoFusion	-55.1108	-98.2302	Unstranded_mRNA_PE100bp	Roberts et al. NEJM 2014	25207766	EGAS00001000654
SJBALL030143_D1	B-ALL	Hyperdiploid	NoFusion	-82.6668	-80.3216	Stranded_total_RNA_PE125bp	this study	this study	EGAS00001004810
SJALL050866_D1	B-ALL	Hyperdiploid	NoFusion	-59.0935	-88.7579	Stranded_total_RNA_PE100bp	Gu et al. Nature Genetics 2019	30643249	EGAS00001003266
SJBALL020722_D1	B-ALL	Hyperdiploid	NoFusion	-66.492	-100.815	Unstranded_mRNA_PE100bp	Gu et al. Nat Comm 2016	27824051	EGAS00001001952
SJALL040102_D1	B-ALL	Hyperdiploid	NoFusion	-69.3109	-91.6513	Stranded_total_RNA_PE100bp	Gu et al. Nature Genetics 2019	30643249	EGAS00001003266
SJBALL030351_D1	B-ALL	Hyperdiploid	NoFusion	-68.276	-82.5967	Stranded_total_RNA_PE125bp	this study	this study	EGAS00001004810
SJBALL030977_D1	B-ALL	Hyperdiploid	NoFusion	-82.1417	-82.9655	Stranded_total_RNA_PE125bp	this study	this study	EGAS00001004810
SJHYPER021928_D1	B-ALL	Hyperdiploid	NoFusion	-81.0661	-90.955	Stranded_total_RNA_PE100bp	Gu et al. Nature Genetics 2019	30643249	EGAS00001003266
SJHYPER022017_D1	B-ALL	Hyperdiploid	NoFusion	-80.6503	-89.0044	Stranded_total_RNA_PE100bp	Gu et al. Nature Genetics 2019	30643249	EGAS00001003266
SJBALL031123_D1	B-ALL	Hyperdiploid	NoFusion	-68.7029	-82.7347	Stranded_total_RNA_PE125bp	this study	this study	EGAS00001004810
SJALL043814_D1	B-ALL	Hyperdiploid	USP9X-DDX3X	-78.7838	-90.3466	Stranded_total_RNA_PE100bp	this study	this study	EGAS00001004810
SJBALL022599_D1	B-ALL	iAMP21	NoFusion	-59.0005	-72.0152	Unstranded_mRNA_PE100bp	Gu et al. Nature Genetics 2019	30643249	EGAS00001003266
SJBALL014610_D1	B-ALL	iAMP21	TMEM2-PTK2B;CBFB-PLA2G15	-75.2718	-77.2788	Stranded_total_RNA_PE100bp	Gu et al. Nat Comm 2016	27824051	EGAS00001001952
SJBALL030434_D1	B-ALL	iAMP21	MAPRE1-OGFR	-64.8828	-80.8381	Stranded_total_RNA_PE125bp	this study	this study	EGAS00001004810
SJBALL020853_D1	B-ALL	iAMP21	P2RY8-CRLF2	-59.8569	-72.6256	Unstranded_mRNA_PE100bp	Roberts et al. NEJM 2014	25207766	EGAS00001000654
SJCOGALL010918_D2	B-ALL	iAMP21	NoFusion	-60.129	-72.5673	Stranded_total_RNA_PE75bp	NA	NA	phs000218
SJBALL031036_D1	B-ALL	iAMP21	NoFusion	-81.7563	-77.4846	Stranded_total_RNA_PE125bp	this study	this study	EGAS00001004810
SJBALL022590_D1	B-ALL	iAMP21	P2RY8-CRLF2	-64.3352	-72.8265	Stranded_total_RNA_PE100bp	Gu et al. Nature Genetics 2019	30643249	EGAS00001003266
SJBALL021900_D1	B-ALL	iAMP21	NoFusion	-68.658	-73.9052	Unstranded_mRNA_PE100bp	Rusch et al. Nat Comm 2018	30262806	EGAS00001002217
SJBALL021159_D2	B-ALL	iAMP21	NoFusion	-122.108	-49.9496	Stranded_total_RNA_PE75bp	NA	NA	phs000218
SJBALL030150_D1	B-ALL	iAMP21	NoFusion	-66.6009	-71.6583	Stranded_total_RNA_PE125bp	this study	this study	EGAS00001004810
SJBALL022597_D1	B-ALL	iAMP21	PAX5-MAPT	-61.8648	-77.5378	Unstranded_mRNA_PE100bp	Gu et al. Nature Genetics 2019	30643249	EGAS00001003266
SJBALL022594_D1	B-ALL	iAMP21	NoFusion	-121.801	-50.1337	Unstranded_mRNA_PE100bp	Gu et al. Nature Genetics 2019	30643249	EGAS00001003266
SJBALL237_D	B-ALL	iAMP21	NoFusion	-75.2949	-78.2536	Unstranded_mRNA_PE100bp	Rusch et al. Nat Comm 2018	30262806	EGAS00001002217
SJBALL022589_D1	B-ALL	iAMP21	P2RY8-CRLF2	-61.6772	-72.2971	Unstranded_mRNA_PE100bp	Gu et al. Nature Genetics 2019	30643249	EGAS00001003266
SJBALL022593_D1	B-ALL	iAMP21	NoFusion	-57.3665	-72.3505	Unstranded_mRNA_PE100bp	Gu et al. Nature Genetics 2019	30643249	EGAS00001003266
SJCOGALL010877_D2	B-ALL	iAMP21	NoFusion	-65.1768	-75.732	Stranded_total_RNA_PE75bp	NA	NA	phs000218
SJBALL021358_D1	B-ALL	iAMP21	REXO1-CPNE7	-56.7775	-72.4911	Unstranded_mRNA_PE100bp	Gu et al. Nature Genetics 2019	30643249	EGAS00001003266
SJBALL021491_D1	B-ALL	iAMP21	NoFusion	-66.3592	-75.0062	Unstranded_mRNA_PE100bp	Gu et al. Nature Genetics 2019	30643249	EGAS00001003266
SJBALL022596_D1	B-ALL	iAMP21	NoFusion	-121.384	-51.5617	Unstranded_mRNA_PE100bp	Gu et al. Nature Genetics 2019	30643249	EGAS00001003266
SJBALL102_D	B-ALL	iAMP21	NoFusion	-68.175	-74.6505	Unstranded_mRNA_PE100bp	Gu et al. Nature Genetics 2019	30643249	EGAS00001003266
SJBALL014273_D1	B-ALL	iAMP21	NoFusion	-60.4317	-71.4673	Stranded_total_RNA_PE100bp	Gu et al. Nat Comm 2016	27824051	EGAS00001001952
SJBALL239_D	B-ALL	iAMP21	NoFusion	-62.2111	-71.7154	Unstranded_mRNA_PE100bp	Roberts et al. NEJM 2014	25207766	EGAS00001000654
SJBALL022587_D1	B-ALL	iAMP21	NoFusion	-63.3161	-72.7097	Stranded_total_RNA_PE100bp	Gu et al. Nature Genetics 2019	30643249	EGAS00001003266
SJBALL271_D	B-ALL	iAMP21	NoFusion	-74.7258	-77.138	Stranded_total_RNA_PE100bp	Gu et al. Nature Genetics 2019	30643249	EGAS00001003266
SJBALL021108_D1	B-ALL	iAMP21	NoFusion	-120.862	-49.8963	Unstranded_mRNA_PE100bp	Gu et al. Nature Genetics 2019	30643249	EGAS00001003266
SJBALL021393_D2	B-ALL	iAMP21	NoFusion	-87.4483	-82.668	Unstranded_mRNA_PE75bp	Gu et al. Nature Genetics 2019	30643249	EGAS00001003266
SJBALL030363_D1	B-ALL	iAMP21	NoFusion	-63.5421	-74.8576	Stranded_total_RNA_PE125bp	this study	this study	EGAS00001004810
SJBALL030334_D1	B-ALL	iAMP21	NoFusion	-86.2513	-83.9432	Stranded_total_RNA_PE125bp	this study	this study	EGAS00001004810
SJBALL041767_D1	B-ALL	iAMP21	NoFusion	-63.3926	-73.215	Stranded_total_RNA_PE100bp	Gu et al. Nature Genetics 2019	30643249	EGAS00001003266
SJBALL020570_D1	B-ALL	iAMP21	PAX5-SEC1P	-119.775	-49.904	Unstranded_mRNA_PE100bp	Gu et al. Nature Genetics 2019	30643249	EGAS00001003266
SJBALL030999_D1	B-ALL	iAMP21	NoFusion	-81.293	-76.2952	Stranded_total_RNA_PE125bp	this study	this study	EGAS00001004810
SJBALL020623_D1	B-ALL	IKZF1 N159Y	NoFusion	47.5563	-15.2983	Unstranded_mRNA_PE100bp	Gu et al. Nat Comm 2016	27824051	EGAS00001001952
SJALL054540_D1	B-ALL	IKZF1 N159Y	NoFusion	46.8132	-16.6238	Stranded_total_RNA_PE100bp	this study	this study	EGAS00001004810
SJBALL020602_D1	B-ALL	IKZF1 N159Y	NoFusion	47.4672	-15.8369	Unstranded_mRNA_PE100bp	Gu et al. Nat Comm 2016	27824051	EGAS00001001952
SJBALL044887_D1	B-ALL	IKZF1 N159Y	NoFusion	46.5192	-16.3362	Stranded_total_RNA_PE100bp	Gu et al. Nature Genetics 2019	30643249	EGAS00001003266
SJBALL020163_D1	B-ALL	IKZF1 N159Y	NoFusion	46.1464	-15.1606	Stranded_total_RNA_PE100bp	Gu et al. Nature Genetics 2019	30643249	EGAS00001003266
SJBALL014288_D1	B-ALL	IKZF1 N159Y	NoFusion	45.7601	-16.7333	Stranded_total_RNA_PE100bp	Gu et al. Nat Comm 2016	27824051	EGAS00001001952
SJBALL020655_D1	B-ALL	IKZF1 N159Y	NoFusion	46.4833	-17.6912	Unstranded_mRNA_PE100bp	Gu et al. Nat Comm 2016	27824051	EGAS00001001952
SJBALL014062_D1	B-ALL	IKZF1 N159Y	NoFusion	45.2437	-15.4668	Stranded_total_RNA_PE100bp	Gu et al. Nat Comm 2016	27824051	EGAS00001001952
SJALL050830_D1	B-ALL	IKZF1 N159Y	NoFusion	46.4873	-14.8426	Stranded_total_RNA_PE100bp	Gu et al. Nature Genetics 2019	30643249	EGAS00001003266
SJALL043819_D1	B-ALL	KMT2A	KMT2A-AFF1	-42.185	16.2564	Stranded_total_RNA_PE100bp	this study	this study	EGAS00001004810
SJBALL013863_D1	B-ALL	KMT2A	KMT2A-AFF1	-48.4379	14.6265	Stranded_total_RNA_PE100bp	Gu et al. Nature Genetics 2019	30643249	EGAS00001003266
SJINF016_D	B-ALL	KMT2A	KMT2A-MLLT1;PAX5-KANK1	-35.555	16.8383	Unstranded_mRNA_PE100bp	Gu et al. Nature Genetics 2019	30643249	EGAS00001003266
SJINF053_D	B-ALL	KMT2A	KMT2A-MLLT3	-33.4479	17.4885	Unstranded_mRNA_PE100bp	Gu et al. Nature Genetics 2019	30643249	EGAS00001003266
SJINF012_D	B-ALL	KMT2A	KMT2A-MLLT10	-33.5176	16.6268	Unstranded_mRNA_PE100bp	Gu et al. Nature Genetics 2019	30643249	EGAS00001003266
SJINF009_D	B-ALL	KMT2A	KMT2A-MLLT1	-34.6964	16.0575	Unstranded_mRNA_PE100bp	Gu et al. Nature Genetics 2019	30643249	EGAS00001003266
SJBALL042276_D1	B-ALL	KMT2A	KMT2A-AFF1	-42.9512	19.0357	Stranded_total_RNA_PE100bp	Gu et al. Nature Genetics 2019	30643249	EGAS00001003266
SJBALL030865_D1	B-ALL	KMT2A	KMT2A-MLLT1;DEXI-TASP1	24.5278	-23.1544	Stranded_total_RNA_PE125bp	this study	this study	EGAS00001004810
SJALL016678_D1	B-ALL	KMT2A	KMT2A-AFF1	-43.4022	14.5825	Stranded_total_RNA_PE100bp	Gu et al. Nature Genetics 2019	30643249	EGAS00001003266
SJBALL042293_D1	B-ALL	KMT2A	KMT2A-AFF1	-44.2914	18.1532	Stranded_total_RNA_PE100bp	Gu et al. Nature Genetics 2019	30643249	EGAS00001003266
SJBALL015041_D1	B-ALL	KMT2A	KMT2A-AFF1	-51.5929	15.1215	Stranded_total_RNA_PE100bp	Gu et al. Nature Genetics 2019	30643249	EGAS00001003266
SJMLL009_D	B-ALL	KMT2A	KMT2A-AFF1	25.7832	-12.5037	Unstranded_mRNA_PE100bp	Gu et al. Nature Genetics 2019	30643249	EGAS00001003266
SJINF065_R	B-ALL	KMT2A	KMT2A-AFF1;AFF1-BSX	-35.835	10.4341	Unstranded_mRNA_PE100bp	Waanders et al. Blood Cancer Disc 2020	32793890	EGAS00001003975
SJMLL023_D	B-ALL	KMT2A	KMT2A-MLLT1;CDK6-PHIP	-42.8234	17.983	Stranded_total_RNA_PE100bp	Gu et al. Nature Genetics 2019	30643249	EGAS00001003266
SJBALL043679_D1	B-ALL	KMT2A	KMT2A-AFF1	-44.1482	16.5082	Stranded_total_RNA_PE100bp	Gu et al. Nature Genetics 2019	30643249	EGAS00001003266
SJALL044298_D1	B-ALL	KMT2A	KMT2A-AFF1	-43.6673	16.6741	Stranded_total_RNA_PE100bp	this study	this study	EGAS00001004810
SJCOGALL010110_D1	B-ALL	KMT2A	KMT2A-EPS15	-45.6004	21.6416	Stranded_total_RNA_PE100bp	Gu et al. Nature Genetics 2019	30643249	EGAS00001003266
SJINF006_D	B-ALL	KMT2A	KMT2A-AFF1	-35.1042	15.3079	Unstranded_mRNA_PE100bp	Gu et al. Nature Genetics 2019	30643249	EGAS00001003266
SJBALL030499_D1	B-ALL	KMT2A	KMT2A-MLLT1	24.5236	-23.1624	Stranded_total_RNA_PE125bp	this study	this study	EGAS00001004810
SJBALL015079_D1	B-ALL	KMT2A	KMT2A-AFF1	-47.6779	16.3399	Stranded_total_RNA_PE100bp	Gu et al. Nature Genetics 2019	30643249	EGAS00001003266
SJINF021_D	B-ALL	KMT2A	KMT2A-MLLT3	28.7665	-11.3964	Unstranded_mRNA_PE100bp	Gu et al. Nature Genetics 2019	30643249	EGAS00001003266
SJINF002_D	B-ALL	KMT2A	KMT2A-AFF1	-36.014	15.1874	Unstranded_mRNA_PE100bp	Gu et al. Nature Genetics 2019	30643249	EGAS00001003266
SJBALL014071_D1	B-ALL	KMT2A	KMT2A-AFF1	-41.7533	9.51653	Stranded_total_RNA_PE100bp	Gu et al. Nat Comm 2016	27824051	EGAS00001001952
SJBALL048065_D1	B-ALL	KMT2A	KMT2A-AFF1	-51.4213	19.0036	Stranded_total_RNA_PE100bp	Gu et al. Nature Genetics 2019	30643249	EGAS00001003266
SJMLL016_D	B-ALL	KMT2A	KMT2A-MLLT3	27.6618	-10.6325	Unstranded_mRNA_PE100bp	Gu et al. Nature Genetics 2019	30643249	EGAS00001003266
SJMLL033_D	B-ALL	KMT2A	KMT2A-AFF1;ZCCHC7-PAX5	-41.4446	20.1054	Stranded_total_RNA_PE100bp	Gu et al. Nature Genetics 2019	30643249	EGAS00001003266
SJBALL042323_D1	B-ALL	KMT2A	KMT2A-AFF1	-45.6506	12.6464	Stranded_total_RNA_PE100bp	Gu et al. Nature Genetics 2019	30643249	EGAS00001003266
SJINF008_D	B-ALL	KMT2A	KMT2A-MLLT1	26.5222	-12.1995	Unstranded_mRNA_PE100bp	Gu et al. Nature Genetics 2019	30643249	EGAS00001003266
SJALL050002_D1	B-ALL	KMT2A	KMT2A-AFF1	-47.8218	15.6326	Stranded_total_RNA_PE100bp	Gu et al. Nature Genetics 2019	30643249	EGAS00001003266
SJINF064_D	B-ALL	KMT2A	KMT2A-AFF1	-37.484	14.3936	Unstranded_mRNA_PE100bp	Gu et al. Nature Genetics 2019	30643249	EGAS00001003266
SJALL054520_D1	B-ALL	KMT2A	KMT2A-AFF1	-50.5543	20.2793	Stranded_total_RNA_PE100bp	this study	this study	EGAS00001004810
SJINF004_D	B-ALL	KMT2A	KMT2A-MLLT10	26.9433	-10.7909	Unstranded_mRNA_PE100bp	Gu et al. Nature Genetics 2019	30643249	EGAS00001003266
SJINF019_D	B-ALL	KMT2A	KMT2A-MLLT3	-31.8628	15.8963	Unstranded_mRNA_PE100bp	Gu et al. Nature Genetics 2019	30643249	EGAS00001003266
SJBALL013867_D1	B-ALL	KMT2A	KMT2A-AFF1	-47.3838	14.52	Stranded_total_RNA_PE100bp	Gu et al. Nature Genetics 2019	30643249	EGAS00001003266
SJBALL015086_D1	B-ALL	KMT2A	KMT2A-MLLT1	-52.7358	15.5816	Stranded_total_RNA_PE100bp	Gu et al. Nature Genetics 2019	30643249	EGAS00001003266
SJBALL042287_D1	B-ALL	KMT2A	KMT2A-MLLT1	-43.9455	18.829	Stranded_total_RNA_PE100bp	Gu et al. Nature Genetics 2019	30643249	EGAS00001003266
SJINF003_D	B-ALL	KMT2A	KMT2A-AFF1	-34.1545	15.6017	Unstranded_mRNA_PE100bp	Gu et al. Nature Genetics 2019	30643249	EGAS00001003266
SJINF068_D	B-ALL	KMT2A	KMT2A-AFF1	-40.0447	10.3679	Unstranded_mRNA_PE100bp	Gu et al. Nature Genetics 2019	30643249	EGAS00001003266
SJBALL013909_D1	B-ALL	KMT2A	KMT2A-AFF1	-44.8524	17.6009	Stranded_total_RNA_PE100bp	Gu et al. Nature Genetics 2019	30643249	EGAS00001003266
SJINF059_D	B-ALL	KMT2A	KMT2A-MLLT1;ID2-IGK	-36.3695	19.2567	Unstranded_mRNA_PE100bp	Gu et al. Nature Genetics 2019	30643249	EGAS00001003266
SJINF066_D	B-ALL	KMT2A	KMT2A-USP2	-30.6958	20.9931	Unstranded_mRNA_PE100bp	Gu et al. Nature Genetics 2019	30643249	EGAS00001003266
SJBALL042255_D1	B-ALL	KMT2A	KMT2A-MLLT1	-48.5152	19.5688	Stranded_total_RNA_PE100bp	Gu et al. Nature Genetics 2019	30643249	EGAS00001003266
SJALL049976_D1	B-ALL	KMT2A	KMT2A-AFF1	-51.3789	17.8667	Stranded_total_RNA_PE100bp	Gu et al. Nature Genetics 2019	30643249	EGAS00001003266
SJMLL003_D	B-ALL	KMT2A	KMT2A-AFF1;AFF1-CCDC84	-39.0991	15.9103	Unstranded_mRNA_PE100bp	Gu et al. Nature Genetics 2019	30643249	EGAS00001003266
SJBALL013866_D1	B-ALL	KMT2A	KMT2A-AFF1	-45.3635	14.9967	Stranded_total_RNA_PE100bp	Gu et al. Nature Genetics 2019	30643249	EGAS00001003266
SJALL055898_D1	B-ALL	KMT2A	KMT2A-AFF1	-48.7961	12.7657	Stranded_total_RNA_PE100bp	this study	this study	EGAS00001004810
SJINF018_D	B-ALL	KMT2A	KMT2A-MLLT10	-30.6463	16.1226	Unstranded_mRNA_PE100bp	Gu et al. Nature Genetics 2019	30643249	EGAS00001003266
SJALL054471_D1	B-ALL	KMT2A	KMT2A-EPS15;PDCD6IP-TASP1	-49.6421	21.7763	Stranded_total_RNA_PE100bp	Gu et al. Nature Genetics 2019	30643249	EGAS00001003266
SJALL059353_D1	B-ALL	KMT2A	KMT2A-AFF1;PDCD6IP-TASP1;DEXI-TASP1	-48.9445	16.4484	Stranded_total_RNA_PE100bp	this study	this study	EGAS00001004810
SJINF010_D	B-ALL	KMT2A	KMT2A-MLLT1	-35.6108	18.838	Unstranded_mRNA_PE100bp	Gu et al. Nature Genetics 2019	30643249	EGAS00001003266
SJBALL013920_D1	B-ALL	KMT2A	KMT2A-AFF1	-46.3049	16.5329	Stranded_total_RNA_PE100bp	Gu et al. Nature Genetics 2019	30643249	EGAS00001003266
SJMLL003329_D2	B-ALL	KMT2A	KMT2A-MLLT3	29.2539	-11.7813	Stranded_total_RNA_PE100bp	Gu et al. Nature Genetics 2019	30643249	EGAS00001003266
SJINF001_D	B-ALL	KMT2A	KMT2A-AFF1	-39.009	11.1078	Unstranded_mRNA_PE100bp	Gu et al. Nature Genetics 2019	30643249	EGAS00001003266
SJALL057947_D1	B-ALL	KMT2A	KMT2A-AFF1	-51.0511	17.2674	Stranded_total_RNA_PE100bp	this study	this study	EGAS00001004810
SJINF060_D	B-ALL	KMT2A	KMT2A-MLLT1;ID2-IGK	-36.445	19.3256	Unstranded_mRNA_PE100bp	Gu et al. Nature Genetics 2019	30643249	EGAS00001003266
SJINF062_D	B-ALL	KMT2A	KMT2A-AFF1	-41.904	8.38451	Unstranded_mRNA_PE100bp	Gu et al. Nature Genetics 2019	30643249	EGAS00001003266
SJALL060399_D1	B-ALL	KMT2A	KMT2A-AFF1;TASP1-PDCD6IP;DEXI-TASP1	-44.8194	10.4063	Stranded_total_RNA_PE100bp	this study	this study	EGAS00001004810
SJBALL030572_D1	B-ALL	KMT2A	KMT2A-MLLT1	-48.5216	7.38255	Stranded_total_RNA_PE125bp	this study	this study	EGAS00001004810
SJBALL015053_D1	B-ALL	KMT2A	KMT2A-MLLT1	-45.7307	18.3393	Stranded_total_RNA_PE100bp	Gu et al. Nature Genetics 2019	30643249	EGAS00001003266
SJALL048082_D1	B-ALL	KMT2A	KMT2A-MLLT1	-46.5009	11.9389	Stranded_total_RNA_PE100bp	this study	this study	EGAS00001004810
SJINF069_D	B-ALL	KMT2A	KMT2A-AFF1	-37.8336	13.7037	Unstranded_mRNA_PE100bp	Gu et al. Nature Genetics 2019	30643249	EGAS00001003266
SJALL048695_D1	B-ALL	KMT2A	KMT2A-AFF1	-46.9737	18.7014	Stranded_total_RNA_PE100bp	Gu et al. Nature Genetics 2019	30643249	EGAS00001003266
SJMLL003304_D2	B-ALL	KMT2A	KMT2A-AFF1	-41.5554	12.4259	Stranded_total_RNA_PE100bp	Gu et al. Nature Genetics 2019	30643249	EGAS00001003266
SJBALL015068_D1	B-ALL	KMT2A	KMT2A-AFF1	-46.209	14.9045	Stranded_total_RNA_PE100bp	Gu et al. Nature Genetics 2019	30643249	EGAS00001003266
SJBALL030059_D1	B-ALL	KMT2A	KMT2A-AFF1	-47.2554	9.83233	Stranded_total_RNA_PE125bp	this study	this study	EGAS00001004810
SJINF011_D	B-ALL	KMT2A	KMT2A-AFF1;AFF1-RAD51B;RAD51B-KMT2A	-37.0988	12.5269	Unstranded_mRNA_PE100bp	Gu et al. Nature Genetics 2019	30643249	EGAS00001003266
SJBALL016265_D1	B-ALL	KMT2A	KMT2A-AFF1	-34.9501	8.76956	Stranded_total_RNA_PE100bp	Gu et al. Nat Comm 2016	27824051	EGAS00001001952
SJINF022_D	B-ALL	KMT2A	KMT2A-MLLT10	-29.4572	15.8337	Unstranded_mRNA_PE100bp	Gu et al. Nature Genetics 2019	30643249	EGAS00001003266
SJALL059535_D1	B-ALL	KMT2A	KMT2A-AFF1;PDCD6IP-TASP1;DEXI-TASP1	-49.1127	15.6142	Stranded_total_RNA_PE100bp	this study	this study	EGAS00001004810
SJALL048709_D1	B-ALL	KMT2A	KMT2A-AFF1	-51.986	17.5902	Stranded_total_RNA_PE100bp	this study	this study	EGAS00001004810
SJALL049975_D1	B-ALL	KMT2A	KMT2A-AFF1	-50.0977	17.163	Stranded_total_RNA_PE100bp	Gu et al. Nature Genetics 2019	30643249	EGAS00001003266
SJINF075_D	B-ALL	KMT2A	KMT2A-AFF1	-39.1361	12.1316	Unstranded_mRNA_PE100bp	Gu et al. Nature Genetics 2019	30643249	EGAS00001003266
SJALL047974_D1	B-ALL	KMT2A	KMT2A-MLLT1	-48.4611	18.9746	Stranded_total_RNA_PE100bp	this study	this study	EGAS00001004810
SJALL059332_D1	B-ALL	KMT2A	KMT2A-AFF1;PDCD6IP-TASP1;DEXI-TASP1	-47.5843	17.3501	Stranded_total_RNA_PE100bp	this study	this study	EGAS00001004810
SJINF013_D	B-ALL	KMT2A	KMT2A-AFF1	-40.192	12.5765	Unstranded_mRNA_PE100bp	Gu et al. Nature Genetics 2019	30643249	EGAS00001003266
SJMLL031_D	B-ALL	KMT2A	KMT2A-MLLT10	28.7856	-12.5782	Stranded_total_RNA_PE100bp	Gu et al. Nature Genetics 2019	30643249	EGAS00001003266
SJBALL030196_D1	B-ALL	KMT2A	KMT2A-MLLT3	27.567	-13.2055	Stranded_total_RNA_PE125bp	this study	this study	EGAS00001004810
SJBALL043681_D1	B-ALL	KMT2A	KMT2A-AFF1	-47.6224	12.0725	Stranded_total_RNA_PE100bp	Gu et al. Nature Genetics 2019	30643249	EGAS00001003266
SJALL044301_D1	B-ALL	KMT2A	KMT2A-AFF1	-47.2942	12.7229	Stranded_total_RNA_PE100bp	this study	this study	EGAS00001004810
SJBALL015171_D1	B-ALL	KMT2A	KMT2A-AFF1	-42.1628	11.0539	Stranded_total_RNA_PE100bp	Gu et al. Nature Genetics 2019	30643249	EGAS00001003266
SJBALL047019_D1	B-ALL	KMT2A	KMT2A-AFF1	-49.8491	13.492	Stranded_total_RNA_PE100bp	Gu et al. Nature Genetics 2019	30643249	EGAS00001003266
SJALL061715_D1	B-ALL	KMT2A	KMT2A-AFF1	-50.2771	18.0974	Stranded_total_RNA_PE100bp	this study	this study	EGAS00001004810
SJINF055_D	B-ALL	KMT2A	KMT2A-AFF1	-38.2308	10.8874	Unstranded_mRNA_PE100bp	Gu et al. Nature Genetics 2019	30643249	EGAS00001003266
SJBALL042292_D1	B-ALL	KMT2A	KMT2A-AFF1	-47.8416	14.037	Stranded_total_RNA_PE100bp	Gu et al. Nature Genetics 2019	30643249	EGAS00001003266
SJALL061702_D1	B-ALL	KMT2A	KMT2A-AFF1;PDCD6IP-TASP1	-48.5997	17.3114	Stranded_total_RNA_PE100bp	this study	this study	EGAS00001004810
SJBALL013899_D1	B-ALL	KMT2A	KMT2A-MLLT1	-45.3833	19.423	Stranded_total_RNA_PE100bp	Gu et al. Nature Genetics 2019	30643249	EGAS00001003266
SJBALL021549_D1	B-ALL	KMT2A	KMT2A-USP2	-28.6697	23.1116	Unstranded_mRNA_PE100bp	Roberts et al. NEJM 2014	25207766	EGAS00001000654
SJBALL047365_D1	B-ALL	KMT2A	KMT2A-EPS15	-46.9455	21.1614	Stranded_total_RNA_PE100bp	Gu et al. Nature Genetics 2019	30643249	EGAS00001003266
SJMLL024_D	B-ALL	KMT2A	KMT2A-MLLT3	29.4291	-13.4412	Stranded_total_RNA_PE100bp	Gu et al. Nature Genetics 2019	30643249	EGAS00001003266
SJBALL048061_D1	B-ALL	KMT2A	KMT2A-AFF1	-46.81	15.5261	Stranded_total_RNA_PE100bp	Gu et al. Nature Genetics 2019	30643249	EGAS00001003266
SJALL048506_D1	B-ALL	KMT2A	KMT2A-MLLT1	23.9768	-10.8412	Stranded_total_RNA_PE100bp	Gu et al. Nature Genetics 2019	30643249	EGAS00001003266
SJALL050001_D1	B-ALL	KMT2A	KMT2A-AFF1	-44.9463	12.979	Stranded_total_RNA_PE100bp	Gu et al. Nature Genetics 2019	30643249	EGAS00001003266
SJINF014_D	B-ALL	KMT2A	KMT2A-AFF1;MSI2-AFF1	-38.0281	15.2045	Unstranded_mRNA_PE100bp	Gu et al. Nature Genetics 2019	30643249	EGAS00001003266
SJINF015_D	B-ALL	KMT2A	KMT2A-MLLT3	27.4855	-11.4856	Unstranded_mRNA_PE100bp	Gu et al. Nature Genetics 2019	30643249	EGAS00001003266
SJMLL004_D	B-ALL	KMT2A	KMT2A-AFF1	-41.5333	12.1738	Stranded_total_RNA_PE100bp	this study	this study	EGAS00001004810
SJINF020_D	B-ALL	KMT2A	KMT2A-AFF1	-40.2202	10.8161	Unstranded_mRNA_PE100bp	Gu et al. Nature Genetics 2019	30643249	EGAS00001003266
SJALL016652_D1	B-ALL	KMT2A	KMT2A-AFF1	-43.802	20.6607	Stranded_total_RNA_PE100bp	Gu et al. Nature Genetics 2019	30643249	EGAS00001003266
SJALL046376_D1	B-ALL	KMT2A	KMT2A-AFF1	-44.426	11.8716	Stranded_total_RNA_PE100bp	this study	this study	EGAS00001004810
SJMLL005_D	B-ALL	KMT2A	KMT2A-AFF1	-38.5463	14.8934	Unstranded_mRNA_PE100bp	Gu et al. Nature Genetics 2019	30643249	EGAS00001003266
SJBALL043666_D1	B-ALL	KMT2A	KMT2A-AFF1;AFF1-IGH	-49.6257	14.4973	Stranded_total_RNA_PE100bp	Gu et al. Nature Genetics 2019	30643249	EGAS00001003266
SJALL044294_D1	B-ALL	KMT2A	KMT2A-AFF1;AFF1-IGH	-50.1786	14.8145	Stranded_total_RNA_PE100bp	this study	this study	EGAS00001004810
SJBALL043670_D1	B-ALL	KMT2A	KMT2A-AFF1	-46.2753	13.8159	Stranded_total_RNA_PE100bp	Gu et al. Nature Genetics 2019	30643249	EGAS00001003266
SJALL050000_D1	B-ALL	LowHypo	NoFusion	2.44328	-19.2717	Stranded_total_RNA_PE100bp	Gu et al. Nature Genetics 2019	30643249	EGAS00001003266
SJBALL048072_D1	B-ALL	LowHypo	NoFusion	11.7781	-17.6592	Stranded_total_RNA_PE100bp	Gu et al. Nature Genetics 2019	30643249	EGAS00001003266
SJBALL042306_D1	B-ALL	LowHypo	NoFusion	9.5899	-17.3937	Stranded_total_RNA_PE100bp	Gu et al. Nature Genetics 2019	30643249	EGAS00001003266
SJALL047518_D1	B-ALL	LowHypo	NoFusion	16.1117	-21.1839	Stranded_total_RNA_PE100bp	this study	this study	EGAS00001004810
SJBALL048075_D1	B-ALL	LowHypo	NoFusion	-3.03167	-19.7505	Stranded_total_RNA_PE100bp	Gu et al. Nature Genetics 2019	30643249	EGAS00001003266
SJALL054510_D1	B-ALL	LowHypo	NoFusion	13.1188	-18.5666	Stranded_total_RNA_PE100bp	Gu et al. Nature Genetics 2019	30643249	EGAS00001003266
SJALL048698_D1	B-ALL	LowHypo	NoFusion	3.25529	-18.7835	Stranded_total_RNA_PE100bp	Gu et al. Nature Genetics 2019	30643249	EGAS00001003266
SJBALL015055_D1	B-ALL	LowHypo	NRIP1-MIR99AHG	-0.410784	-18.0044	Stranded_total_RNA_PE100bp	Gu et al. Nature Genetics 2019	30643249	EGAS00001003266
SJHYPO074_D	B-ALL	LowHypo	NoFusion	14.3826	-21.123	Stranded_total_RNA_PE100bp	Gu et al. Nature Genetics 2019	30643249	EGAS00001003266
SJALL055636_D1	B-ALL	LowHypo	MATR3-UBE2D2	13.3318	-16.8867	Stranded_total_RNA_PE100bp	this study	this study	EGAS00001004810
SJBALL030983_D1	B-ALL	LowHypo	NoFusion	12.9194	-26.014	Stranded_total_RNA_PE125bp	this study	this study	EGAS00001004810
SJBALL014391_D1	B-ALL	LowHypo	NoFusion	-0.183195	-20.3921	Stranded_total_RNA_PE100bp	Gu et al. Nat Comm 2016	27824051	EGAS00001001952
SJBALL020622_D1	B-ALL	LowHypo	NoFusion	17.1991	-20.2668	Unstranded_mRNA_PE100bp	Gu et al. Nat Comm 2016	27824051	EGAS00001001952
SJALL054546_D1	B-ALL	LowHypo	NoFusion	11.1632	-19.1124	Stranded_total_RNA_PE100bp	this study	this study	EGAS00001004810
SJALL049681_D1	B-ALL	LowHypo	NoFusion	-3.27386	-19.1204	Stranded_total_RNA_PE100bp	Gu et al. Nature Genetics 2019	30643249	EGAS00001003266
SJBALL015138_D1	B-ALL	LowHypo	NoFusion	1.23888	-18.6709	Stranded_total_RNA_PE100bp	Gu et al. Nature Genetics 2019	30643249	EGAS00001003266
SJBALL048079_D1	B-ALL	LowHypo	NoFusion	2.36957	-21.4998	Stranded_total_RNA_PE100bp	Gu et al. Nature Genetics 2019	30643249	EGAS00001003266
SJALL054514_D1	B-ALL	LowHypo	NoFusion	9.85253	-20.8621	Stranded_total_RNA_PE100bp	Gu et al. Nature Genetics 2019	30643249	EGAS00001003266
SJBALL014140_D1	B-ALL	LowHypo	NoFusion	4.65528	-19.4466	Stranded_total_RNA_PE100bp	Gu et al. Nat Comm 2016	27824051	EGAS00001001952
SJBALL013865_D1	B-ALL	LowHypo	NoFusion	-6.08056	-21.5913	Stranded_total_RNA_PE100bp	Gu et al. Nature Genetics 2019	30643249	EGAS00001003266
SJBALL015183_D1	B-ALL	LowHypo	NoFusion	12.8957	-19.6139	Stranded_total_RNA_PE100bp	Gu et al. Nature Genetics 2019	30643249	EGAS00001003266
SJALL054491_D1	B-ALL	LowHypo	NoFusion	11.4953	-20.8584	Stranded_total_RNA_PE100bp	Gu et al. Nature Genetics 2019	30643249	EGAS00001003266
SJALL049936_D1	B-ALL	LowHypo	NoFusion	2.30204	-12.7994	Stranded_total_RNA_PE100bp	Gu et al. Nature Genetics 2019	30643249	EGAS00001003266
SJBALL048064_D1	B-ALL	LowHypo	NoFusion	11.9293	-22.8148	Stranded_total_RNA_PE100bp	Gu et al. Nature Genetics 2019	30643249	EGAS00001003266
SJALL054547_D1	B-ALL	LowHypo	NoFusion	11.823	-18.4829	Stranded_total_RNA_PE100bp	this study	this study	EGAS00001004810
SJALL049489_D1	B-ALL	LowHypo	NoFusion	14.1725	-19.2722	Stranded_total_RNA_PE100bp	this study	this study	EGAS00001004810
SJHYPO077_D	B-ALL	LowHypo	NoFusion	15.5925	-24.5955	Stranded_total_RNA_PE100bp	Gu et al. Nature Genetics 2019	30643249	EGAS00001003266
SJBALL044898_D1	B-ALL	LowHypo	NoFusion	-5.03463	-21.2958	Stranded_total_RNA_PE100bp	Gu et al. Nature Genetics 2019	30643249	EGAS00001003266
SJHYPO126_D	B-ALL	LowHypo	ETV6-HBB	15.8133	-22.4252	Stranded_total_RNA_PE100bp	Gu et al. Nature Genetics 2019	30643249	EGAS00001003266
SJBALL047032_D1	B-ALL	LowHypo	NoFusion	-3.18677	-18.1698	Stranded_total_RNA_PE100bp	Gu et al. Nature Genetics 2019	30643249	EGAS00001003266
SJALL055642_D1	B-ALL	LowHypo	KMT2E-PPP2R2A	13.5822	-17.5088	Stranded_total_RNA_PE100bp	this study	this study	EGAS00001004810
SJALL050016_D1	B-ALL	LowHypo	NoFusion	-4.6377	-22.0761	Stranded_total_RNA_PE100bp	Gu et al. Nature Genetics 2019	30643249	EGAS00001003266
SJALL047544_D1	B-ALL	LowHypo	NoFusion	13.268	-20.7799	Stranded_total_RNA_PE100bp	this study	this study	EGAS00001004810
SJBALL047361_D1	B-ALL	LowHypo	NoFusion	4.36527	-23.559	Stranded_total_RNA_PE100bp	Gu et al. Nature Genetics 2019	30643249	EGAS00001003266
SJALL059541_D1	B-ALL	LowHypo	NoFusion	14.0008	-25.8684	Stranded_total_RNA_PE100bp	this study	this study	EGAS00001004810
SJALL057941_D1	B-ALL	LowHypo	NoFusion	15.498	-19.6683	Stranded_total_RNA_PE100bp	this study	this study	EGAS00001004810
SJALL049672_D1	B-ALL	LowHypo	NoFusion	2.29847	-18.826	Stranded_total_RNA_PE100bp	Gu et al. Nature Genetics 2019	30643249	EGAS00001003266
SJALL049968_D1	B-ALL	LowHypo	NoFusion	-1.63238	-22.0867	Stranded_total_RNA_PE100bp	Gu et al. Nature Genetics 2019	30643249	EGAS00001003266
SJBALL015167_D1	B-ALL	LowHypo	NoFusion	-2.08569	-18.626	Stranded_total_RNA_PE100bp	Gu et al. Nature Genetics 2019	30643249	EGAS00001003266
SJBALL021778_D1	B-ALL	LowHypo	NoFusion	-5.75035	-17.7527	Unstranded_mRNA_PE100bp	Gu et al. Nat Comm 2016	27824051	EGAS00001001952
SJHYPER003_D	B-ALL	LowHypo	ZFAND3-DGKH	-0.118118	-21.5574	Unstranded_mRNA_PE100bp	Roberts et al. NEJM 2014	25207766	EGAS00001000654
SJALL059340_D1	B-ALL	LowHypo	IGLV4-69-PPM1F;PI4KA-USP18	-3.98008	-23.2894	Stranded_total_RNA_PE100bp	this study	this study	EGAS00001004810
SJHYPO125_D	B-ALL	LowHypo	NoFusion	17.4123	-22.2726	Stranded_total_RNA_PE100bp	Gu et al. Nature Genetics 2019	30643249	EGAS00001003266
SJALL047978_D1	B-ALL	LowHypo	NoFusion	2.8268	-20.9745	Stranded_total_RNA_PE100bp	this study	this study	EGAS00001004810
SJALL054534_D1	B-ALL	LowHypo	NoFusion	4.97424	-12.3841	Stranded_total_RNA_PE100bp	this study	this study	EGAS00001004810
SJALL049964_D1	B-ALL	LowHypo	NoFusion	13.5742	-20.4258	Stranded_total_RNA_PE100bp	Gu et al. Nature Genetics 2019	30643249	EGAS00001003266
SJBALL015122_D1	B-ALL	LowHypo	NoFusion	2.79627	-12.1822	Stranded_total_RNA_PE100bp	Gu et al. Nature Genetics 2019	30643249	EGAS00001003266
SJHYPO120_D	B-ALL	LowHypo	NoFusion	-0.615944	-20.5577	Stranded_total_RNA_PE100bp	this study	this study	EGAS00001004810
SJBALL047369_D1	B-ALL	LowHypo	NoFusion	-4.1788	-20.1608	Stranded_total_RNA_PE100bp	Gu et al. Nature Genetics 2019	30643249	EGAS00001003266
SJALL050009_D1	B-ALL	LowHypo	CREBBP-UTRN	9.28545	-15.2509	Stranded_total_RNA_PE100bp	Gu et al. Nature Genetics 2019	30643249	EGAS00001003266
SJBALL013329_D1	B-ALL	LowHypo	NoFusion	8.65547	-18.8425	Unstranded_mRNA_PE100bp	Gu et al. Nat Comm 2016	27824051	EGAS00001001952
SJALL059524_D1	B-ALL	LowHypo	ARID1B-ZDHHC14	17.5572	-23.4638	Stranded_total_RNA_PE100bp	this study	this study	EGAS00001004810
SJBALL015059_D1	B-ALL	LowHypo	NoFusion	0.413069	-16.4635	Stranded_total_RNA_PE100bp	Gu et al. Nature Genetics 2019	30643249	EGAS00001003266
SJALL048685_D1	B-ALL	LowHypo	NoFusion	10.2588	-16.2829	Stranded_total_RNA_PE100bp	Gu et al. Nature Genetics 2019	30643249	EGAS00001003266
SJHYPER022044_D1	B-ALL	LowHypo	NoFusion	16.4333	-23.4057	Stranded_total_RNA_PE100bp	Gu et al. Nature Genetics 2019	30643249	EGAS00001003266
SJBALL047362_D1	B-ALL	LowHypo	NoFusion	10.9346	-14.0857	Stranded_total_RNA_PE100bp	Gu et al. Nature Genetics 2019	30643249	EGAS00001003266
SJBALL042273_D1	B-ALL	LowHypo	NoFusion	-6.62271	-22.1721	Stranded_total_RNA_PE100bp	Gu et al. Nature Genetics 2019	30643249	EGAS00001003266
SJALL048697_D1	B-ALL	LowHypo	NoFusion	6.11433	-21.1981	Stranded_total_RNA_PE100bp	Gu et al. Nature Genetics 2019	30643249	EGAS00001003266
SJBALL048076_D1	B-ALL	LowHypo	NoFusion	-2.83666	-20.7598	Stranded_total_RNA_PE100bp	Gu et al. Nature Genetics 2019	30643249	EGAS00001003266
SJBALL030482_D1	B-ALL	LowHypo	NoFusion	12.5087	-25.4485	Stranded_total_RNA_PE125bp	this study	this study	EGAS00001004810
SJBALL016289_D1	B-ALL	LowHypo	NoFusion	13.1791	-23.4685	Stranded_total_RNA_PE100bp	Gu et al. Nat Comm 2016	27824051	EGAS00001001952
SJALL054509_D1	B-ALL	LowHypo	NoFusion	15.2574	-17.7758	Stranded_total_RNA_PE100bp	Gu et al. Nature Genetics 2019	30643249	EGAS00001003266
SJALL048682_D1	B-ALL	LowHypo	NoFusion	-4.70588	-20.0239	Stranded_total_RNA_PE100bp	Gu et al. Nature Genetics 2019	30643249	EGAS00001003266
SJBALL042257_D1	B-ALL	LowHypo	NoFusion	15.2504	-25.6659	Stranded_total_RNA_PE100bp	Gu et al. Nature Genetics 2019	30643249	EGAS00001003266
SJALL060145_D1	B-ALL	LowHypo	FOXN3-LRP2	-3.40228	-21.7455	Stranded_total_RNA_PE100bp	this study	this study	EGAS00001004810
SJBALL021769_D1	B-ALL	LowHypo	NoFusion	-2.04864	-16.1144	Unstranded_mRNA_PE100bp	Gu et al. Nat Comm 2016	27824051	EGAS00001001952
SJBALL014224_D1	B-ALL	LowHypo	NoFusion	16.0838	-15.9438	Stranded_total_RNA_PE100bp	Gu et al. Nat Comm 2016	27824051	EGAS00001001952
SJALL054482_D1	B-ALL	LowHypo	NoFusion	9.99917	-13.9941	Stranded_total_RNA_PE100bp	Gu et al. Nature Genetics 2019	30643249	EGAS00001003266
SJALL048694_D1	B-ALL	LowHypo	ERBB4-IKZF2	11.0576	-16.0918	Stranded_total_RNA_PE100bp	Gu et al. Nature Genetics 2019	30643249	EGAS00001003266
SJBALL016251_D1	B-ALL	LowHypo	NoFusion	11.2982	-15.0911	Stranded_total_RNA_PE100bp	Gu et al. Nat Comm 2016	27824051	EGAS00001001952
SJALL054552_D1	B-ALL	LowHypo	NoFusion	-4.22788	-20.8159	Stranded_total_RNA_PE100bp	this study	this study	EGAS00001004810
SJALL055892_D1	B-ALL	LowHypo	NoFusion	0.51654	-17.1009	Stranded_total_RNA_PE100bp	this study	this study	EGAS00001004810
SJALL059545_D1	B-ALL	LowHypo	NoFusion	9.9265	-19.0956	Stranded_total_RNA_PE100bp	this study	this study	EGAS00001004810
SJALL054477_D1	B-ALL	LowHypo	NoFusion	7.30646	-21.1011	Stranded_total_RNA_PE100bp	Gu et al. Nature Genetics 2019	30643249	EGAS00001003266
SJALL048675_D1	B-ALL	LowHypo	ERBB4-IKZF2	14.8058	-26.5964	Stranded_total_RNA_PE100bp	Gu et al. Nature Genetics 2019	30643249	EGAS00001003266
SJBALL042310_D1	B-ALL	LowHypo	NoFusion	14.5498	-27.1841	Stranded_total_RNA_PE100bp	Gu et al. Nature Genetics 2019	30643249	EGAS00001003266
SJBALL042299_D1	B-ALL	LowHypo	NFATC1-CTDP1	-4.95838	-23.5262	Stranded_total_RNA_PE100bp	Gu et al. Nature Genetics 2019	30643249	EGAS00001003266
SJBALL043660_D1	B-ALL	LowHypo	PAN3-FLT1	-7.07304	-20.1983	Stranded_total_RNA_PE100bp	Gu et al. Nature Genetics 2019	30643249	EGAS00001003266
SJALL049962_D1	B-ALL	LowHypo	NoFusion	13.5263	-21.6979	Stranded_total_RNA_PE100bp	Gu et al. Nature Genetics 2019	30643249	EGAS00001003266
SJBALL042301_D1	B-ALL	LowHypo	NoFusion	7.63809	-16.4757	Stranded_total_RNA_PE100bp	Gu et al. Nature Genetics 2019	30643249	EGAS00001003266
SJBALL044264_D1	B-ALL	LowHypo	NoFusion	10.2371	-15.1945	Stranded_total_RNA_PE100bp	Gu et al. Nature Genetics 2019	30643249	EGAS00001003266
SJBALL043674_D1	B-ALL	LowHypo	NoFusion	3.35073	-24.6539	Stranded_total_RNA_PE100bp	Gu et al. Nature Genetics 2019	30643249	EGAS00001003266
SJALL059547_D1	B-ALL	LowHypo	NoFusion	5.03887	-12.348	Stranded_total_RNA_PE100bp	this study	this study	EGAS00001004810
SJALL054511_D1	B-ALL	LowHypo	NoFusion	2.35477	-12.1673	Stranded_total_RNA_PE100bp	Gu et al. Nature Genetics 2019	30643249	EGAS00001003266
SJBALL021563_D1	B-ALL	LowHypo	NoFusion	14.3809	-23.1247	Stranded_total_RNA_PE100bp	Gu et al. Nature Genetics 2019	30643249	EGAS00001003266
SJALL055621_D1	B-ALL	LowHypo	NoFusion	-6.08263	-18.956	Stranded_total_RNA_PE100bp	this study	this study	EGAS00001004810
SJBALL046124_D1	B-ALL	LowHypo	USP9X-DDX3X	9.68368	-18.0089	Stranded_total_RNA_PE100bp	Gu et al. Nature Genetics 2019	30643249	EGAS00001003266
SJALL055654_D1	B-ALL	LowHypo	NoFusion	13.7291	-24.7902	Stranded_total_RNA_PE100bp	this study	this study	EGAS00001004810
SJBALL014035_D1	B-ALL	LowHypo	STAG2-ATRX	7.32451	-15.2894	Stranded_total_RNA_PE100bp	Gu et al. Nat Comm 2016	27824051	EGAS00001001952
SJALL049958_D1	B-ALL	LowHypo	NoFusion	-0.897031	-14.2523	Stranded_total_RNA_PE100bp	Gu et al. Nature Genetics 2019	30643249	EGAS00001003266
SJBALL013925_D1	B-ALL	LowHypo	NoFusion	-6.06694	-20.028	Stranded_total_RNA_PE100bp	Gu et al. Nature Genetics 2019	30643249	EGAS00001003266
SJALL060683_D1	B-ALL	LowHypo	MKNK2-PTMA	9.03379	-20.1143	Stranded_total_RNA_PE100bp	this study	this study	EGAS00001004810
SJBALL042313_D1	B-ALL	LowHypo	NoFusion	-1.85888	-17.0842	Stranded_total_RNA_PE100bp	Gu et al. Nature Genetics 2019	30643249	EGAS00001003266
SJBALL046117_D1	B-ALL	LowHypo	EPOR-IGH	4.46241	-23.8142	Stranded_total_RNA_PE100bp	Gu et al. Nature Genetics 2019	30643249	EGAS00001003266
SJBALL047018_D1	B-ALL	LowHypo	NoFusion	5.84871	-23.5343	Stranded_total_RNA_PE100bp	Gu et al. Nature Genetics 2019	30643249	EGAS00001003266
SJBALL013894_D1	B-ALL	LowHypo	NoFusion	-6.6981	-19.2888	Stranded_total_RNA_PE100bp	Gu et al. Nature Genetics 2019	30643249	EGAS00001003266
SJBALL020166_D1	B-ALL	MEF2D	MEF2D-HNRNPUL1	59.1884	-47.4582	Stranded_total_RNA_PE100bp	Gu et al. Nature Genetics 2019	30643249	EGAS00001003266
SJBALL021005_D1	B-ALL	MEF2D	MEF2D-BCL9	61.8586	-50.2327	Unstranded_mRNA_PE100bp	Gu et al. Nat Comm 2016	27824051	EGAS00001001952
SJBALL020141_D1	B-ALL	MEF2D	MEF2D-DAZAP1;KMT2A-MATR3	57.0123	-52.4993	Unstranded_mRNA_PE100bp	Gu et al. Nat Comm 2016	27824051	EGAS00001001952
SJBALL016275_D1	B-ALL	MEF2D	MEF2D-BCL9	58.7242	-45.4478	Stranded_total_RNA_PE100bp	Gu et al. Nat Comm 2016	27824051	EGAS00001001952
SJALL048705_D1	B-ALL	MEF2D	MEF2D-HNRNPUL1;MTAP-TYRP1	57.7195	-44.6342	Stranded_total_RNA_PE100bp	this study	this study	EGAS00001004810
SJBALL042270_D1	B-ALL	MEF2D	MEF2D-BCL9	58.9813	-48.5861	Stranded_total_RNA_PE100bp	Gu et al. Nature Genetics 2019	30643249	EGAS00001003266
SJCOGALL010859_D2	B-ALL	MEF2D	MEF2D-HNRNPUL1	56.976	-50.4443	Stranded_total_RNA_PE75bp	NA	NA	phs000218
SJBALL020142_D1	B-ALL	MEF2D	MEF2D-DAZAP1;KMT2A-MATR3	56.9715	-52.5086	Unstranded_mRNA_PE100bp	Gu et al. Nature Genetics 2019	30643249	EGAS00001003266
SJBALL030603_D1	B-ALL	MEF2D	MEF2D-BCL9	59.0654	-50.6955	Stranded_total_RNA_PE125bp	this study	this study	EGAS00001004810
SJALL016660_D1	B-ALL	MEF2D	MEF2D-BCL9;CEP350-NVL	60.2614	-47.3611	Stranded_total_RNA_PE100bp	Gu et al. Nature Genetics 2019	30643249	EGAS00001003266
SJALL050014_D1	B-ALL	MEF2D	MEF2D-BCL9	56.1422	-46.2969	Stranded_total_RNA_PE100bp	Gu et al. Nature Genetics 2019	30643249	EGAS00001003266
SJBALL006_D	B-ALL	MEF2D	MEF2D-BCL9	58.2414	-48.0897	Stranded_total_RNA_PE100bp	Gu et al. Nature Genetics 2019	30643249	EGAS00001003266
SJALL047543_D1	B-ALL	MEF2D	MEF2D-BCL9	62.5963	-48.173	Stranded_total_RNA_PE100bp	this study	this study	EGAS00001004810
SJBALL211_D	B-ALL	MEF2D	MEF2D-BCL9	56.5006	-49.1739	Stranded_total_RNA_PE100bp	Gu et al. Nature Genetics 2019	30643249	EGAS00001003266
SJBALL020964_D1	B-ALL	MEF2D	MEF2D-HNRNPUL1	60.9039	-51.2576	Unstranded_mRNA_PE100bp	Gu et al. Nat Comm 2016	27824051	EGAS00001001952
SJALL014953_D1	B-ALL	MEF2D	MEF2D-HNRNPM	59.673	-46.0413	Stranded_total_RNA_PE100bp	Gu et al. Nature Genetics 2019	30643249	EGAS00001003266
SJBALL016252_D1	B-ALL	MEF2D	MEF2D-BCL9;STAG1-MSL2	61.8809	-43.7996	Stranded_total_RNA_PE100bp	Gu et al. Nat Comm 2016	27824051	EGAS00001001952
SJBALL020703_D1	B-ALL	MEF2D	MEF2D-BCL9	57.2154	-47.9113	Unstranded_mRNA_PE100bp	Gu et al. Nat Comm 2016	27824051	EGAS00001001952
SJALL049993_D1	B-ALL	MEF2D	MEF2D-BCL9	61.6005	-48.9226	Stranded_total_RNA_PE100bp	Gu et al. Nature Genetics 2019	30643249	EGAS00001003266
SJBALL020987_D1	B-ALL	MEF2D	MEF2D-BCL9	57.6231	-49.0032	Unstranded_mRNA_PE100bp	Gu et al. Nat Comm 2016	27824051	EGAS00001001952
SJBALL030268_D1	B-ALL	MEF2D	MEF2D-BCL9	63.0125	-49.3423	Stranded_total_RNA_PE125bp	this study	this study	EGAS00001004810
SJBALL020711_D1	B-ALL	MEF2D	MEF2D-BCL9	55.0148	-47.1453	Unstranded_mRNA_PE100bp	Gu et al. Nat Comm 2016	27824051	EGAS00001001952
SJALL054481_D1	B-ALL	MEF2D	MEF2D-BCL9	56.1313	-46.214	Stranded_total_RNA_PE100bp	this study	this study	EGAS00001004810
SJBALL016291_D1	B-ALL	MEF2D	MEF2D-BCL9	60.5103	-45.4635	Stranded_total_RNA_PE100bp	Gu et al. Nat Comm 2016	27824051	EGAS00001001952
SJALL054563_D1	B-ALL	MEF2D	MEF2D-BCL9	57.7459	-45.6242	Stranded_total_RNA_PE100bp	this study	this study	EGAS00001004810
SJBALL013388_D1	B-ALL	MEF2D	MEF2D-BCL9	59.3207	-46.9159	Stranded_total_RNA_PE100bp	Gu et al. Nat Comm 2016	27824051	EGAS00001001952
SJBALL020667_D1	B-ALL	MEF2D	MEF2D-BCL9	55.1281	-49.246	Unstranded_mRNA_PE100bp	Gu et al. Nat Comm 2016	27824051	EGAS00001001952
SJBALL104_D	B-ALL	MEF2D	MEF2D-HNRNPUL1	60.5529	-48.8941	Stranded_total_RNA_PE100bp	Gu et al. Nature Genetics 2019	30643249	EGAS00001003266
SJBALL013874_D1	B-ALL	MEF2D	MEF2D-SS18	61.5709	-46.4135	Stranded_total_RNA_PE100bp	Gu et al. Nature Genetics 2019	30643249	EGAS00001003266
SJALL049981_D1	B-ALL	MEF2D	MEF2D-BCL9;DOCK10-BARD1	62.4379	-43.3625	Stranded_total_RNA_PE100bp	Gu et al. Nature Genetics 2019	30643249	EGAS00001003266
SJALL054537_D1	B-ALL	MEF2D	MEF2D-BCL9	58.6458	-41.7657	Stranded_total_RNA_PE100bp	this study	this study	EGAS00001004810
SJALL016669_D1	B-ALL	MEF2D	MEF2D-BCL9	61.3932	-48.0401	Stranded_total_RNA_PE100bp	Gu et al. Nature Genetics 2019	30643249	EGAS00001003266
SJBALL020967_D1	B-ALL	MEF2D	MEF2D-BCL9	54.8945	-48.2622	Unstranded_mRNA_PE100bp	Gu et al. Nat Comm 2016	27824051	EGAS00001001952
SJALL055894_D1	B-ALL	MEF2D	MEF2D-BCL9	58.3349	-44.2947	Stranded_total_RNA_PE100bp	this study	this study	EGAS00001004810
SJBALL016306_D1	B-ALL	MEF2D	MEF2D-BCL9	59.0087	-42.7897	Stranded_total_RNA_PE100bp	Gu et al. Nat Comm 2016	27824051	EGAS00001001952
SJBALL020917_D1	B-ALL	MEF2D	MEF2D-HNRNPUL1	59.8857	-52.3332	Unstranded_mRNA_PE100bp	Gu et al. Nat Comm 2016	27824051	EGAS00001001952
SJCOGALL010884_D2	B-ALL	MEF2D	MEF2D-BCL9	53.8206	-46.7179	Stranded_total_RNA_PE75bp	NA	NA	phs000218
SJBALL020906_D1	B-ALL	MEF2D	MEF2D-BCL9	62.1157	-51.4316	Unstranded_mRNA_PE100bp	Gu et al. Nat Comm 2016	27824051	EGAS00001001952
SJBALL004097_D2	B-ALL	MEF2D	MEF2D-HNRNPUL1	58.2855	-50.1752	Stranded_total_RNA_PE100bp	Gu et al. Nature Genetics 2019	30643249	EGAS00001003266
SJCOGALL010235_D3	B-ALL	MEF2D	MEF2D-BCL9	55.8973	-47.622	Stranded_total_RNA_PE75bp	NA	NA	phs000218
SJBALL016286_D1	B-ALL	MEF2D	MEF2D-SS18	60.7006	-50.4003	Stranded_total_RNA_PE100bp	Gu et al. Nat Comm 2016	27824051	EGAS00001001952
SJBALL081_D	B-ALL	MEF2D	MEF2D-BCL9	54.8843	-45.1855	Stranded_total_RNA_PE100bp	Gu et al. Nature Genetics 2019	30643249	EGAS00001003266
SJALL060678_D1	B-ALL	MEF2D	MEF2D-HNRNPUL1	59.0656	-49.3575	Stranded_total_RNA_PE100bp	this study	this study	EGAS00001004810
SJALL015958_D1	B-ALL	MEF2D	MEF2D-BCL9;SEC22B-BCL9	59.904	-44.5438	Stranded_total_RNA_PE100bp	Gu et al. Nature Genetics 2019	30643249	EGAS00001003266
SJINF074_D	B-ALL	NUTM1	ACIN1-NUTM1	33.6588	-8.7689	Unstranded_mRNA_PE100bp	Gu et al. Nature Genetics 2019	30643249	EGAS00001003266
SJINF049_D	B-ALL	NUTM1	BRD9-NUTM1	25.6039	8.00481	Unstranded_mRNA_PE100bp	Gu et al. Nature Genetics 2019	30643249	EGAS00001003266
SJBALL205_D	B-ALL	NUTM1	CUX1-NUTM1	33.9827	-13.0072	Stranded_total_RNA_PE100bp	Gu et al. Nature Genetics 2019	30643249	EGAS00001003266
SJBALL016239_D1	B-ALL	NUTM1	CUX1-NUTM1	34.6752	-13.0894	Stranded_total_RNA_PE100bp	Gu et al. Nat Comm 2016	27824051	EGAS00001001952
SJALL047525_D1	B-ALL	NUTM1	ACIN1-NUTM1	33.9931	-11.2153	Stranded_total_RNA_PE100bp	this study	this study	EGAS00001004810
SJALL050848_D1	B-ALL	NUTM1	CUX1-NUTM1	34.5331	-12.9028	Stranded_total_RNA_PE100bp	Gu et al. Nature Genetics 2019	30643249	EGAS00001003266
SJBALL020608_D1	B-ALL	NUTM1	ACIN1-NUTM1	26.76	10.4696	Unstranded_mRNA_PE100bp	Gu et al. Nat Comm 2016	27824051	EGAS00001001952
SJBALL020694_D1	B-ALL	NUTM1	ZNF618-NUTM1	27.8193	8.99886	Unstranded_mRNA_PE100bp	Gu et al. Nat Comm 2016	27824051	EGAS00001001952
SJALL047516_D1	B-ALL	NUTM1	ZNF618-NUTM1	32.6292	-10.2226	Stranded_total_RNA_PE100bp	this study	this study	EGAS00001004810
SJBALL082_D	B-ALL	NUTM1	ACIN1-NUTM1	33.1008	-10.4372	Stranded_total_RNA_PE100bp	Gu et al. Nature Genetics 2019	30643249	EGAS00001003266
SJALL050013_D1	B-ALL	PAX5 P80R	NoFusion	15.5463	-92.2086	Stranded_total_RNA_PE100bp	Gu et al. Nature Genetics 2019	30643249	EGAS00001003266
SJBALL015_D	B-ALL	PAX5 P80R	NoFusion	17.1591	-89.0905	Stranded_total_RNA_PE100bp	Roberts et al. NEJM 2014	25207766	EGAS00001000654
SJBALL042286_D1	B-ALL	PAX5 P80R	NoFusion	14.847	-89.2818	Stranded_total_RNA_PE100bp	Gu et al. Nature Genetics 2019	30643249	EGAS00001003266
SJBALL015072_D1	B-ALL	PAX5 P80R	P2RY8-CRLF2	15.585	-87.5446	Stranded_total_RNA_PE100bp	Gu et al. Nature Genetics 2019	30643249	EGAS00001003266
PATAAH	B-ALL	PAX5 P80R	NoFusion	18.4681	-88.3012	Stranded_total_RNA_PE75bp	NA	NA	phs000218
SJBALL021104_D1	B-ALL	PAX5 P80R	NoFusion	21.0042	-87.9302	Unstranded_mRNA_PE100bp	Gu et al. Nat Comm 2016	27824051	EGAS00001001952
SJALL049116_D1	B-ALL	PAX5 P80R	NoFusion	14.5987	-90.4886	Stranded_total_RNA_PE100bp	this study	this study	EGAS00001004810
SJBALL014464_D1	B-ALL	PAX5 P80R	NoFusion	18.2821	-89.6228	Stranded_total_RNA_PE100bp	Gu et al. Nat Comm 2016	27824051	EGAS00001001952
SJALL061717_D1	B-ALL	PAX5 P80R	NoFusion	12.5118	-88.055	Stranded_total_RNA_PE100bp	this study	this study	EGAS00001004810
SJBALL048066_D1	B-ALL	PAX5 P80R	NoFusion	13.488	-89.786	Stranded_total_RNA_PE100bp	Gu et al. Nature Genetics 2019	30643249	EGAS00001003266
SJHYPO112_D	B-ALL	PAX5 P80R	NoFusion	18.9113	-92.4552	Stranded_total_RNA_PE100bp	Gu et al. Nature Genetics 2019	30643249	EGAS00001003266
SJHYPO103_D	B-ALL	PAX5 P80R	NoFusion	21.433	-91.6408	Unstranded_mRNA_PE75bp	Gu et al. Nature Genetics 2019	30643249	EGAS00001003266
SJBALL192_D	B-ALL	PAX5 P80R	NoFusion	18.7894	-90.9665	Stranded_total_RNA_PE100bp	Gu et al. Nature Genetics 2019	30643249	EGAS00001003266
SJBALL015056_D1	B-ALL	PAX5 P80R	NoFusion	16.0571	-89.2332	Stranded_total_RNA_PE100bp	Gu et al. Nat Comm 2016	27824051	EGAS00001001952
SJBALL021082_D1	B-ALL	PAX5 P80R	NoFusion	18.1849	-94.3393	Unstranded_mRNA_PE100bp	Gu et al. Nature Genetics 2019	30643249	EGAS00001003266
SJBALL016250_D1	B-ALL	PAX5 P80R	NoFusion	17.8625	-88.1413	Stranded_total_RNA_PE100bp	Gu et al. Nat Comm 2016	27824051	EGAS00001001952
SJBALL016272_D1	B-ALL	PAX5 P80R	NoFusion	18.0107	-86.3775	Stranded_total_RNA_PE100bp	Gu et al. Nat Comm 2016	27824051	EGAS00001001952
SJBALL022600_D1	B-ALL	PAX5 P80R	NoFusion	13.7695	-93.7495	Stranded_total_RNA_PE100bp	Gu et al. Nature Genetics 2019	30643249	EGAS00001003266
SJBALL015118_D1	B-ALL	PAX5 P80R	NoFusion	15.2283	-93.0652	Stranded_total_RNA_PE100bp	Gu et al. Nature Genetics 2019	30643249	EGAS00001003266
SJBALL015144_D1	B-ALL	PAX5 P80R	NoFusion	15.9612	-93.3714	Stranded_total_RNA_PE100bp	Gu et al. Nature Genetics 2019	30643249	EGAS00001003266
PATCJJ	B-ALL	PAX5 P80R	NoFusion	19.5787	-92.607	Stranded_total_RNA_PE75bp	NA	NA	phs000218
SJBALL020789_D1	B-ALL	PAX5 P80R	CRLF2-IGH	20.4582	-88.2486	Unstranded_mRNA_PE100bp	Roberts et al. NEJM 2014	25207766	EGAS00001000654
SJALL054506_D1	B-ALL	PAX5 P80R	NoFusion	17.6625	-92.4195	Stranded_total_RNA_PE100bp	Gu et al. Nature Genetics 2019	30643249	EGAS00001003266
SJALL040076_D1	B-ALL	PAX5 P80R	NoFusion	15.9636	-90.7576	Stranded_total_RNA_PE100bp	Gu et al. Nature Genetics 2019	30643249	EGAS00001003266
SJBALL020651_D1	B-ALL	PAX5 P80R	NoFusion	15.657	-95.1744	Unstranded_mRNA_PE100bp	Gu et al. Nat Comm 2016	27824051	EGAS00001001952
SJBALL020098_D1	B-ALL	PAX5 P80R	NoFusion	11.4042	-87.8733	Unstranded_mRNA_PE100bp	Gu et al. Nat Comm 2016	27824051	EGAS00001001952
SJHYPO102_D	B-ALL	PAX5 P80R	NoFusion	18.6042	-93.5767	Unstranded_mRNA_PE100bp	Gu et al. Nature Genetics 2019	30643249	EGAS00001003266
SJBALL020807_D1	B-ALL	PAX5 P80R	NoFusion	17.2784	-93.505	Unstranded_mRNA_PE100bp	Roberts et al. NEJM 2014	25207766	EGAS00001000654
SJALL054555_D1	B-ALL	PAX5 P80R	NoFusion	12.7171	-88.4374	Stranded_total_RNA_PE100bp	this study	this study	EGAS00001004810
SJBALL046123_D1	B-ALL	PAX5 P80R	NoFusion	14.4287	-92.0037	Stranded_total_RNA_PE100bp	Gu et al. Nature Genetics 2019	30643249	EGAS00001003266
SJALL058976_D1	B-ALL	PAX5 P80R	NoFusion	19.7938	-90.5354	Stranded_total_RNA_PE100bp	this study	this study	EGAS00001004810
SJALL054528_D1	B-ALL	PAX5 P80R	NoFusion	13.2205	-94.193	Stranded_total_RNA_PE100bp	this study	this study	EGAS00001004810
SJBALL043656_D1	B-ALL	PAX5 P80R	NoFusion	17.5756	-92.4151	Stranded_total_RNA_PE100bp	Gu et al. Nature Genetics 2019	30643249	EGAS00001003266
SJBALL021772_D1	B-ALL	PAX5 P80R	NoFusion	19.4518	-89.0452	Unstranded_mRNA_PE100bp	Roberts et al. NEJM 2014	25207766	EGAS00001000654
SJBALL020666_D1	B-ALL	PAX5 P80R	NoFusion	15.9378	-94.8183	Unstranded_mRNA_PE100bp	Gu et al. Nat Comm 2016	27824051	EGAS00001001952
SJBALL014044_D1	B-ALL	PAX5 P80R	NoFusion	17.5068	-87.2607	Stranded_total_RNA_PE100bp	Gu et al. Nat Comm 2016	27824051	EGAS00001001952
SJBALL015137_D1	B-ALL	PAX5 P80R	NoFusion	14.3803	-88.3804	Stranded_total_RNA_PE100bp	Gu et al. Nature Genetics 2019	30643249	EGAS00001003266
SJALL049973_D1	B-ALL	PAX5 P80R	NoFusion	16.7326	-95.7045	Stranded_total_RNA_PE100bp	Gu et al. Nature Genetics 2019	30643249	EGAS00001003266
SJBALL021043_D1	B-ALL	PAX5 P80R	NoFusion	12.2893	-92.2589	Unstranded_mRNA_PE100bp	Gu et al. Nat Comm 2016	27824051	EGAS00001001952
SJBALL013378_D1	B-ALL	PAX5 P80R	NAT10-LDLRAD3	19.3307	-87.4628	Unstranded_mRNA_PE100bp	Gu et al. Nat Comm 2016	27824051	EGAS00001001952
SJALL049939_D1	B-ALL	PAX5 P80R	NoFusion	13.2559	-90.7987	Stranded_total_RNA_PE100bp	Gu et al. Nature Genetics 2019	30643249	EGAS00001003266
SJALL054485_D1	B-ALL	PAX5 P80R	NoFusion	16.6326	-88.0332	Stranded_total_RNA_PE100bp	Gu et al. Nature Genetics 2019	30643249	EGAS00001003266
SJBALL030532_D1	B-ALL	PAX5 P80R	P2RY8-CRLF2	16.009	-86.1724	Stranded_total_RNA_PE125bp	this study	this study	EGAS00001004810
SJBALL047022_D1	B-ALL	PAX5 P80R	NoFusion	10.0098	-90.2778	Stranded_total_RNA_PE100bp	Gu et al. Nature Genetics 2019	30643249	EGAS00001003266
SJALL059536_D1	B-ALL	PAX5 P80R	NoFusion	9.66068	-88.8803	Stranded_total_RNA_PE100bp	this study	this study	EGAS00001004810
SJBALL014011_D1	B-ALL	PAX5 P80R	NoFusion	17.0903	-90.334	Stranded_total_RNA_PE100bp	Gu et al. Nat Comm 2016	27824051	EGAS00001001952
SJBALL042304_D1	B-ALL	PAX5 P80R	NoFusion	10.8567	-91.3998	Stranded_total_RNA_PE100bp	Gu et al. Nature Genetics 2019	30643249	EGAS00001003266
SJBALL020739_D1	B-ALL	PAX5 P80R	NoFusion	11.441	-92.913	Unstranded_mRNA_PE100bp	Gu et al. Nat Comm 2016	27824051	EGAS00001001952
SJALL060687_D1	B-ALL	PAX5 P80R	NoFusion	11.1381	-91.113	Stranded_total_RNA_PE100bp	this study	this study	EGAS00001004810
SJBALL013351_D1	B-ALL	PAX5alt	DBX1-PAX5	13.7297	-59.5666	Unstranded_mRNA_PE100bp	Gu et al. Nat Comm 2016	27824051	EGAS00001001952
SJALL054542_D1	B-ALL	PAX5alt	NoFusion	-0.548011	-60.9569	Stranded_total_RNA_PE100bp	this study	this study	EGAS00001004810
SJALL055639_D1	B-ALL	PAX5alt	NoFusion	8.90828	-57.1602	Stranded_total_RNA_PE100bp	this study	this study	EGAS00001004810
SJALL044312_D1	B-ALL	PAX5alt	NoFusion	9.96388	-79.5851	Stranded_total_RNA_PE100bp	this study	this study	EGAS00001004810
SJBALL044890_D1	B-ALL	PAX5alt	NoFusion	9.77702	-79.5544	Stranded_total_RNA_PE100bp	Gu et al. Nature Genetics 2019	30643249	EGAS00001003266
SJBALL020870_D1	B-ALL	PAX5alt	NoFusion	10.7263	-54.0436	Unstranded_mRNA_PE100bp	Gu et al. Nat Comm 2016	27824051	EGAS00001001952
SJALL040064_D1	B-ALL	PAX5alt	PAX5-CBFA2T3;NLRC5-PSMA4	6.54362	-68.1686	Stranded_total_RNA_PE100bp	Gu et al. Nature Genetics 2019	30643249	EGAS00001003266
SJBALL015128_D1	B-ALL	PAX5alt	NoFusion	10.6784	-57.265	Stranded_total_RNA_PE100bp	Gu et al. Nature Genetics 2019	30643249	EGAS00001003266
SJALL015618_D1	B-ALL	PAX5alt	P2RY8-CRLF2;PLAA-DNAH12	11.2678	-63.1863	Stranded_total_RNA_PE100bp	Gu et al. Nature Genetics 2019	30643249	EGAS00001003266
SJHYPO145_D	B-ALL	PAX5alt	P2RY8-CRLF2;PAX5-ZNF521	9.26327	-67.0106	Stranded_total_RNA_PE100bp	Gu et al. Nature Genetics 2019	30643249	EGAS00001003266
SJBALL224_D	B-ALL	PAX5alt	NoFusion	5.29167	-59.4438	Unstranded_mRNA_PE100bp	Topka et al. PLoS Genetics 2015	26102509	EGAS00001000447
SJBALL020122_D1	B-ALL	PAX5alt	NoFusion	9.58836	-54.9109	Unstranded_mRNA_PE100bp	Gu et al. Nat Comm 2016	27824051	EGAS00001001952
SJBALL210_D	B-ALL	PAX5alt	PAX5-CBFA2T2;MAPRE1-KDM4C;MYDGF-DNM2	6.78898	-59.4261	Stranded_total_RNA_PE100bp	Gu et al. Nature Genetics 2019	30643249	EGAS00001003266
SJBALL198_D	B-ALL	PAX5alt	BMP2K-LEF1	5.02218	-59.7223	Unstranded_mRNA_PE100bp	Topka et al. PLoS Genetics 2015	26102509	EGAS00001000447
SJBALL020689_D1	B-ALL	PAX5alt	PAX5-AUTS2;P2RY8-CRLF2	14.1843	-59.707	Unstranded_mRNA_PE100bp	Gu et al. Nat Comm 2016	27824051	EGAS00001001952
SJBALL016259_D1	B-ALL	PAX5alt	NoFusion	10.6164	-63.9636	Stranded_total_RNA_PE100bp	Gu et al. Nat Comm 2016	27824051	EGAS00001001952
SJBALL020706_D1	B-ALL	PAX5alt	PAX5-NCOA5;P2RY8-CRLF2	2.43628	-62.2162	Unstranded_mRNA_PE100bp	Gu et al. Nat Comm 2016	27824051	EGAS00001001952
SJBALL014435_D1	B-ALL	PAX5alt	NoFusion	8.69724	-60.8229	Stranded_total_RNA_PE100bp	Gu et al. Nat Comm 2016	27824051	EGAS00001001952
SJALL054493_D1	B-ALL	PAX5alt	NoFusion	16.2522	-56.8147	Stranded_total_RNA_PE100bp	Gu et al. Nature Genetics 2019	30643249	EGAS00001003266
SJBALL022478_D1	B-ALL	PAX5alt	KMT2A-TNS3;IKZF1-KMT2A;TNS3-IKZF1	5.48987	-62.3886	Stranded_total_RNA_PE100bp	Gu et al. Nature Genetics 2019	30643249	EGAS00001003266
SJALL040109_D1	B-ALL	PAX5alt	NoFusion	5.92378	-72.1707	Stranded_total_RNA_PE100bp	Gu et al. Nature Genetics 2019	30643249	EGAS00001003266
SJBALL021947_D1	B-ALL	PAX5alt	NoFusion	7.37457	-63.9996	Stranded_total_RNA_PE100bp	Gu et al. Nature Genetics 2019	30643249	EGAS00001003266
SJBALL021147_D1	B-ALL	PAX5alt	MBNL1-MEIS2	10.4097	-54.6964	Unstranded_mRNA_PE100bp	Gu et al. Nat Comm 2016	27824051	EGAS00001001952
SJBALL020810_D1	B-ALL	PAX5alt	NoFusion	14.5094	-57.9592	Unstranded_mRNA_PE100bp	Gu et al. Nat Comm 2016	27824051	EGAS00001001952
SJBALL021283_D2	B-ALL	PAX5alt	POLB-LRRC6;PAX5-ITD	14.7005	-66.3747	Stranded_total_RNA_PE75bp	NA	NA	phs000218
SJBALL043811_D1	B-ALL	PAX5alt	PAX5-ALDH18A1	3.84613	-56.0616	Stranded_total_RNA_PE100bp	this study	this study	EGAS00001004810
SJBALL021735_D1	B-ALL	PAX5alt	NoFusion	16.0193	-80.2418	Unstranded_mRNA_PE100bp	Gu et al. Nat Comm 2016	27824051	EGAS00001001952
SJALL057950_D1	B-ALL	PAX5alt	NoFusion	10.2161	-57.7372	Stranded_total_RNA_PE100bp	this study	this study	EGAS00001004810
SJBALL063_D	B-ALL	PAX5alt	NoFusion	7.08439	-61.7008	Stranded_total_RNA_PE100bp	Gu et al. Nature Genetics 2019	30643249	EGAS00001003266
SJBALL090_D	B-ALL	PAX5alt	NoFusion	7.97358	-56.5273	Stranded_total_RNA_PE100bp	Gu et al. Nature Genetics 2019	30643249	EGAS00001003266
SJBALL013355_D1	B-ALL	PAX5alt	PAX5-FBRSL1	1.67144	-60.8988	Unstranded_mRNA_PE100bp	Gu et al. Nat Comm 2016	27824051	EGAS00001001952
SJBALL014162_D1	B-ALL	PAX5alt	IGH-EPOR;PAX5-ZCCHC7	-1.43687	-60.7581	Stranded_total_RNA_PE100bp	Gu et al. Nat Comm 2016	27824051	EGAS00001001952
SJBALL020699_D1	B-ALL	PAX5alt	DENND1A-ZCCHC7	10.413	-52.5208	Unstranded_mRNA_PE100bp	Gu et al. Nat Comm 2016	27824051	EGAS00001001952
SJALL047520_D1	B-ALL	PAX5alt	PAX5-CBFA2T3	3.26332	-55.9304	Stranded_total_RNA_PE100bp	this study	this study	EGAS00001004810
SJBALL042288_D1	B-ALL	PAX5alt	NoFusion	13.8771	-78.5322	Stranded_total_RNA_PE100bp	Gu et al. Nature Genetics 2019	30643249	EGAS00001003266
SJBALL021263_D2	B-ALL	PAX5alt	P2RY8-CRLF2	3.66149	-67.6652	Stranded_total_RNA_PE75bp	NA	NA	phs000218
SJALL048088_D1	B-ALL	PAX5alt	NoFusion	0.230784	-63.2779	Stranded_total_RNA_PE100bp	this study	this study	EGAS00001004810
SJBALL041786_D1	B-ALL	PAX5alt	NoFusion	19.2049	-52.9436	Stranded_total_RNA_PE100bp	Gu et al. Nature Genetics 2019	30643249	EGAS00001003266
SJBALL015147_D1	B-ALL	PAX5alt	P2RY8-CRLF2	-0.974045	-61.4548	Stranded_total_RNA_PE100bp	Gu et al. Nature Genetics 2019	30643249	EGAS00001003266
SJALL055629_D1	B-ALL	PAX5alt	NoFusion	15.4098	-61.1085	Stranded_total_RNA_PE100bp	this study	this study	EGAS00001004810
SJBALL021944_D1	B-ALL	PAX5alt	PAX5-ZNF521	8.44112	-67.9875	Stranded_total_RNA_PE100bp	Gu et al. Nature Genetics 2019	30643249	EGAS00001003266
SJBALL020986_D1	B-ALL	PAX5alt	NoFusion	10.9562	-58.8598	Stranded_total_RNA_PE100bp	Gu et al. Nature Genetics 2019	30643249	EGAS00001003266
SJBALL002229_D3	B-ALL	PAX5alt	NoFusion	11.3659	-58.5755	Stranded_total_RNA_PE100bp	this study	this study	EGAS00001004810
SJHYPO021982_D1	B-ALL	PAX5alt	NoFusion	8.00616	-65.7996	Stranded_total_RNA_PE100bp	Gu et al. Nature Genetics 2019	30643249	EGAS00001003266
SJBALL021327_D1	B-ALL	PAX5alt	PAX5-ELN	2.02455	-66.4509	Unstranded_mRNA_PE100bp	Roberts et al. NEJM 2014	25207766	EGAS00001000654
SJALL054503_D1	B-ALL	PAX5alt	NoFusion	16.1328	-53.6054	Stranded_total_RNA_PE100bp	Gu et al. Nature Genetics 2019	30643249	EGAS00001003266
SJALL054457_D1	B-ALL	PAX5alt	NoFusion	6.87899	-61.8689	Stranded_total_RNA_PE100bp	Gu et al. Nature Genetics 2019	30643249	EGAS00001003266
SJBALL030346_D1	B-ALL	PAX5alt	PAX5-DACH1	18.5367	-66.7702	Stranded_total_RNA_PE125bp	this study	this study	EGAS00001004810
SJALL057924_D1	B-ALL	PAX5alt	NoFusion	17.8977	-53.9031	Stranded_total_RNA_PE100bp	this study	this study	EGAS00001004810
SJBALL020682_D1	B-ALL	PAX5alt	PAX5-AUTS2	13.5876	-66.1335	Unstranded_mRNA_PE100bp	Gu et al. Nat Comm 2016	27824051	EGAS00001001952
SJALL054480_D1	B-ALL	PAX5alt	NoFusion	14.3623	-78.7409	Stranded_total_RNA_PE100bp	Gu et al. Nature Genetics 2019	30643249	EGAS00001003266
SJALL040113_D1	B-ALL	PAX5alt	NoFusion	7.50813	-61.0691	Stranded_total_RNA_PE100bp	Gu et al. Nature Genetics 2019	30643249	EGAS00001003266
SJBALL196_D	B-ALL	PAX5alt	NoFusion	7.45001	-55.936	Stranded_total_RNA_PE100bp	Gu et al. Nature Genetics 2019	30643249	EGAS00001003266
SJHYPO109_D	B-ALL	PAX5alt	PAX5-ZNF521;P2RY8-CRLF2	4.43889	-64.306	Unstranded_mRNA_PE100bp	Roberts et al. NEJM 2014	25207766	EGAS00001000654
SJBALL094_D	B-ALL	PAX5alt	NoFusion	4.81326	-70.6901	Stranded_total_RNA_PE100bp	Gu et al. Nature Genetics 2019	30643249	EGAS00001003266
SJBALL020872_D1	B-ALL	PAX5alt	NoFusion	13.5424	-70.1262	Unstranded_mRNA_PE100bp	Gu et al. Nat Comm 2016	27824051	EGAS00001001952
SJBALL021255_D2	B-ALL	PAX5alt	NoFusion	11.8729	-54.0059	Stranded_total_RNA_PE75bp	NA	NA	phs000218
SJBALL016301_D1	B-ALL	PAX5alt	PAX5-DACH1	3.63161	-63.6685	Stranded_total_RNA_PE100bp	Gu et al. Nat Comm 2016	27824051	EGAS00001001952
SJBALL014370_D1	B-ALL	PAX5alt	PAX5-FOXP1	4.57615	-60.8899	Stranded_total_RNA_PE100bp	Gu et al. Nat Comm 2016	27824051	EGAS00001001952
SJBALL022020_D1	B-ALL	PAX5alt	PAX5-AUTS2	5.12333	-68.7316	Stranded_total_RNA_PE100bp	Gu et al. Nature Genetics 2019	30643249	EGAS00001003266
SJBALL030294_D1	B-ALL	PAX5alt	NoFusion	11.4655	-75.8501	Stranded_total_RNA_PE125bp	this study	this study	EGAS00001004810
SJBALL016271_D1	B-ALL	PAX5alt	NoFusion	11.7399	-60.4736	Stranded_total_RNA_PE100bp	Gu et al. Nat Comm 2016	27824051	EGAS00001001952
SJBALL030742_D1	B-ALL	PAX5alt	NoFusion	17.8275	-68.8678	Stranded_total_RNA_PE125bp	this study	this study	EGAS00001004810
SJBALL116_D	B-ALL	PAX5alt	NoFusion	2.89181	-72.7418	Stranded_total_RNA_PE100bp	Gu et al. Nature Genetics 2019	30643249	EGAS00001003266
SJALL040072_D1	B-ALL	PAX5alt	NoFusion	7.23344	-58.4564	Stranded_total_RNA_PE100bp	Gu et al. Nature Genetics 2019	30643249	EGAS00001003266
SJALL049988_D1	B-ALL	PAX5alt	NoFusion	8.94054	-79.6506	Stranded_total_RNA_PE100bp	Gu et al. Nature Genetics 2019	30643249	EGAS00001003266
SJHYPO021991_D1	B-ALL	PAX5alt	PAX5-ZCCHC7	6.10046	-70.4468	Stranded_total_RNA_PE100bp	Gu et al. Nature Genetics 2019	30643249	EGAS00001003266
SJALL040107_D1	B-ALL	PAX5alt	NoFusion	11.7598	-79.243	Stranded_total_RNA_PE100bp	Gu et al. Nature Genetics 2019	30643249	EGAS00001003266
SJALL061710_D1	B-ALL	PAX5alt	ID4-IGH	12.2294	-56.3107	Stranded_total_RNA_PE100bp	this study	this study	EGAS00001004810
SJBALL020643_D1	B-ALL	PAX5alt	NoFusion	15.2075	-80.5267	Unstranded_mRNA_PE100bp	Gu et al. Nat Comm 2016	27824051	EGAS00001001952
SJBALL020673_D1	B-ALL	PAX5alt	NoFusion	16.173	-59.4928	Unstranded_mRNA_PE100bp	Gu et al. Nat Comm 2016	27824051	EGAS00001001952
SJHYPO108_D	B-ALL	PAX5alt	NoFusion	3.97953	-65.998	Unstranded_mRNA_PE100bp	Gu et al. Nature Genetics 2019	30643249	EGAS00001003266
SJBALL020101_D1	B-ALL	PAX5alt	NoFusion	14.2039	-80.4107	Unstranded_mRNA_PE100bp	Gu et al. Nat Comm 2016	27824051	EGAS00001001952
SJBALL030853_D1	B-ALL	PAX5alt	NoFusion	17.8579	-67.629	Stranded_total_RNA_PE125bp	this study	this study	EGAS00001004810
SJBALL022604_D1	B-ALL	PAX5alt	NoFusion	18.6738	-61.2733	Unstranded_mRNA_PE100bp	Gu et al. Nature Genetics 2019	30643249	EGAS00001003266
SJALL043813_D1	B-ALL	PAX5alt	ARID1B-RBKS;TOX-FUT10	14.703	-64.074	Stranded_total_RNA_PE100bp	this study	this study	EGAS00001004810
SJALL054468_D1	B-ALL	PAX5alt	NoFusion	13.1181	-79.0217	Stranded_total_RNA_PE100bp	Gu et al. Nature Genetics 2019	30643249	EGAS00001003266
SJALL061955_D1	B-ALL	PAX5alt	PAX5-NR2E1;TANC1-BCL11A;LEF1-KLHL8	-1.33549	-62.4559	Stranded_total_RNA_PE100bp	this study	this study	EGAS00001004810
SJBALL021941_D1	B-ALL	PAX5alt	PAX5-CBFA2T3	8.99792	-69.684	Stranded_total_RNA_PE100bp	Gu et al. Nature Genetics 2019	30643249	EGAS00001003266
SJBALL231_D	B-ALL	PAX5alt	PAX5-ESRRA;P2RY8-CRLF2	4.34805	-64.8074	Unstranded_mRNA_PE100bp	Roberts et al. NEJM 2014	25207766	EGAS00001000654
SJBALL020839_D1	B-ALL	PAX5alt	PAX5-AUTS2	13.0303	-67.3084	Unstranded_mRNA_PE100bp	Gu et al. Nat Comm 2016	27824051	EGAS00001001952
SJALL049974_D1	B-ALL	PAX5alt	NoFusion	9.63364	-65.4973	Stranded_total_RNA_PE100bp	Gu et al. Nature Genetics 2019	30643249	EGAS00001003266
SJALL040054_D1	B-ALL	PAX5alt	PAX5-FOXP1	9.22746	-62.8019	Stranded_total_RNA_PE100bp	Gu et al. Nature Genetics 2019	30643249	EGAS00001003266
SJBALL030144_D1	B-ALL	PAX5alt	NoFusion	8.41376	-71.9174	Stranded_total_RNA_PE125bp	this study	this study	EGAS00001004810
SJBALL015104_D1	B-ALL	PAX5alt	NoFusion	11.5237	-80.3726	Stranded_total_RNA_PE100bp	Gu et al. Nature Genetics 2019	30643249	EGAS00001003266
SJBALL032_R	B-ALL	PAX5alt	NoFusion	2.4096	-65.0048	Stranded_total_RNA_PE100bp	Waanders et al. Blood Cancer Disc 2020	32793890	EGAS00001003975
SJHYPO113_D	B-ALL	PAX5alt	NoFusion	4.19397	-70.4207	Unstranded_mRNA_PE100bp	Gu et al. Nature Genetics 2019	30643249	EGAS00001003266
SJBALL013344_D1	B-ALL	PAX5alt	PAX5-NOL4L	2.73629	-66.7264	Unstranded_mRNA_PE100bp	Gu et al. Nat Comm 2016	27824051	EGAS00001001952
SJHYPO022024_D1	B-ALL	PAX5alt	PAX5-ZNF521;ZNF521-RNLS	9.67098	-67.684	Stranded_total_RNA_PE100bp	Gu et al. Nature Genetics 2019	30643249	EGAS00001003266
SJBALL020590_D1	B-ALL	PAX5alt	PAX5-TAF3	20.6872	-59.3282	Unstranded_mRNA_PE100bp	Gu et al. Nat Comm 2016	27824051	EGAS00001001952
SJBALL020901_D1	B-ALL	PAX5alt	PAX5-DMRTA2	11.5422	-65.9677	Unstranded_mRNA_PE100bp	Gu et al. Nat Comm 2016	27824051	EGAS00001001952
SJBALL030378_D1	B-ALL	PAX5alt	IGH-CRLF2	16.9159	-67.6514	Stranded_total_RNA_PE125bp	this study	this study	EGAS00001004810
SJBALL020836_D1	B-ALL	PAX5alt	NoFusion	12.33	-78.3556	Unstranded_mRNA_PE100bp	Roberts et al. NEJM 2014	25207766	EGAS00001000654
SJALL054465_D1	B-ALL	PAX5alt	NoFusion	8.31384	-57.9081	Stranded_total_RNA_PE100bp	Gu et al. Nature Genetics 2019	30643249	EGAS00001003266
SJBALL020766_D1	B-ALL	PAX5alt	PAX5-DACH1	12.2107	-65.3146	Unstranded_mRNA_PE100bp	Gu et al. Nature Genetics 2019	30643249	EGAS00001003266
SJCOGALL010234_D3	B-ALL	PAX5alt	NoFusion	4.16176	-62.7365	Stranded_total_RNA_PE75bp	NA	NA	phs000218
SJBALL047033_D1	B-ALL	PAX5alt	NoFusion	-9.85483	-56.7969	Stranded_total_RNA_PE100bp	Gu et al. Nature Genetics 2019	30643249	EGAS00001003266
SJALL059540_D1	B-ALL	PAX5alt	PAX5-FOXP1	18.0532	-63.3295	Stranded_total_RNA_PE100bp	this study	this study	EGAS00001004810
SJBALL020629_D1	B-ALL	PAX5alt	NoFusion	2.90595	-71.2493	Unstranded_mRNA_PE100bp	Gu et al. Nat Comm 2016	27824051	EGAS00001001952
SJBALL117_D	B-ALL	PAX5alt	NoFusion	16.2345	-63.5896	Stranded_total_RNA_PE100bp	Gu et al. Nature Genetics 2019	30643249	EGAS00001003266
SJALL049980_D1	B-ALL	PAX5alt	NoFusion	13.8782	-69.0575	Stranded_total_RNA_PE100bp	Gu et al. Nature Genetics 2019	30643249	EGAS00001003266
SJBALL047027_D1	B-ALL	PAX5alt	NoFusion	11.0547	-81.1408	Stranded_total_RNA_PE100bp	Gu et al. Nature Genetics 2019	30643249	EGAS00001003266
SJALL059335_D1	B-ALL	PAX5alt	NoFusion	17.8933	-59.9797	Stranded_total_RNA_PE100bp	this study	this study	EGAS00001004810
SJBALL015149_D1	B-ALL	PAX5alt	NoFusion	18.1647	-53.9691	Stranded_total_RNA_PE100bp	Gu et al. Nature Genetics 2019	30643249	EGAS00001003266
SJBALL042320_D1	B-ALL	PAX5alt	NoFusion	11.1191	-55.4104	Stranded_total_RNA_PE100bp	Gu et al. Nature Genetics 2019	30643249	EGAS00001003266
SJBALL021955_D1	B-ALL	PAX5alt	NoFusion	9.13629	-69.9789	Stranded_total_RNA_PE100bp	Gu et al. Nature Genetics 2019	30643249	EGAS00001003266
SJBALL016246_D1	B-ALL	PAX5alt	NoFusion	14.8386	-64.4756	Stranded_total_RNA_PE100bp	Gu et al. Nat Comm 2016	27824051	EGAS00001001952
SJBALL020900_D1	B-ALL	PAX5alt	NoFusion	19.1865	-57.3905	Unstranded_mRNA_PE100bp	Gu et al. Nat Comm 2016	27824051	EGAS00001001952
SJALL048684_D1	B-ALL	PAX5alt	PAX5-GREB1L	15.3602	-61.776	Stranded_total_RNA_PE100bp	Gu et al. Nature Genetics 2019	30643249	EGAS00001003266
SJBALL020888_D1	B-ALL	PAX5alt	NoFusion	11.1625	-61.4055	Unstranded_mRNA_PE100bp	Gu et al. Nat Comm 2016	27824051	EGAS00001001952
SJBALL042314_D1	B-ALL	PAX5alt	NoFusion	14.0948	-76.612	Stranded_total_RNA_PE100bp	Gu et al. Nature Genetics 2019	30643249	EGAS00001003266
SJALL040083_D1	B-ALL	PAX5alt	P2RY8-CRLF2	9.79423	-61.684	Stranded_total_RNA_PE100bp	Gu et al. Nature Genetics 2019	30643249	EGAS00001003266
SJCOGALL010221_D3	B-ALL	PAX5alt	PAX5-CBFA2T3	14.8391	-67.7599	Stranded_total_RNA_PE75bp	NA	NA	phs000218
SJBALL016262_D1	B-ALL	PAX5alt	TMPRSS9-PAX5	3.36996	-59.3806	Stranded_total_RNA_PE100bp	Gu et al. Nat Comm 2016	27824051	EGAS00001001952
SJBALL030700_D1	B-ALL	PAX5alt	NoFusion	10.6132	-70.7278	Stranded_total_RNA_PE125bp	this study	this study	EGAS00001004810
SJBALL020805_D1	B-ALL	PAX5alt	PAX5-RHOXF2B	11.9977	-66.7196	Unstranded_mRNA_PE100bp	Gu et al. Nat Comm 2016	27824051	EGAS00001001952
SJBALL020777_D1	B-ALL	PAX5alt	PAX5-NOL4L	2.26215	-72.153	Unstranded_mRNA_PE100bp	Gu et al. Nat Comm 2016	27824051	EGAS00001001952
SJBALL042289_D1	B-ALL	PAX5alt	NoFusion	13.5258	-55.8336	Stranded_total_RNA_PE100bp	Gu et al. Nature Genetics 2019	30643249	EGAS00001003266
SJALL015945_D1	B-ALL	PAX5alt	NoFusion	12.883	-77.3663	Stranded_total_RNA_PE100bp	Gu et al. Nature Genetics 2019	30643249	EGAS00001003266
SJBALL013332_D1	B-ALL	PAX5alt	NoFusion	17.7557	-60.972	Unstranded_mRNA_PE100bp	Gu et al. Nat Comm 2016	27824051	EGAS00001001952
SJALL050007_D1	B-ALL	PAX5alt	NoFusion	14.4779	-76.0337	Stranded_total_RNA_PE100bp	Gu et al. Nature Genetics 2019	30643249	EGAS00001003266
SJALL049987_D1	B-ALL	PAX5alt	PAX5-ZNF318	8.51287	-64.1256	Stranded_total_RNA_PE100bp	Gu et al. Nature Genetics 2019	30643249	EGAS00001003266
SJBALL020725_D1	B-ALL	PAX5alt	PAX5-FKBP15;UBAC2-SLC31A1	13.0291	-63.3345	Unstranded_mRNA_PE100bp	Gu et al. Nat Comm 2016	27824051	EGAS00001001952
SJBALL030894_D1	B-ALL	PAX5alt	PAX5-KLF3	16.8774	-65.1257	Stranded_total_RNA_PE125bp	this study	this study	EGAS00001004810
SJALL060682_D1	B-ALL	PAX5alt	NoFusion	12.3951	-55.84	Stranded_total_RNA_PE100bp	this study	this study	EGAS00001004810
SJBALL030463_D1	B-ALL	PAX5alt	SARNP-DDX23;CDK5RAP2-TJP2	10.8431	-70.1484	Stranded_total_RNA_PE125bp	this study	this study	EGAS00001004810
SJBALL030095_D1	B-ALL	PAX5alt	PAX5-NOL4L	6.24406	-69.3471	Stranded_total_RNA_PE125bp	this study	this study	EGAS00001004810
SJBALL042285_D1	B-ALL	PAX5alt	NoFusion	16.1646	-76.988	Stranded_total_RNA_PE100bp	Gu et al. Nature Genetics 2019	30643249	EGAS00001003266
SJBALL015170_D1	B-ALL	PAX5alt	NoFusion	15.3854	-78.763	Stranded_total_RNA_PE100bp	Gu et al. Nature Genetics 2019	30643249	EGAS00001003266
SJBALL020721_D1	B-ALL	PAX5alt	NoFusion	20.8261	-59.665	Unstranded_mRNA_PE100bp	Gu et al. Nat Comm 2016	27824051	EGAS00001001952
SJALL015939_D1	B-ALL	PAX5alt	PAX5-CBFA2T3	18.645	-64.4783	Stranded_total_RNA_PE100bp	Gu et al. Nature Genetics 2019	30643249	EGAS00001003266
SJBALL043655_D1	B-ALL	PAX5alt	NoFusion	16.3086	-76.552	Stranded_total_RNA_PE100bp	Gu et al. Nature Genetics 2019	30643249	EGAS00001003266
SJBALL020880_D2	B-ALL	PAX5alt	NoFusion	6.2647	-65.4682	Stranded_total_RNA_PE75bp	NA	NA	phs000218
SJBALL020626_D1	B-ALL	PAX5alt	NoFusion	13.038	-61.8438	Unstranded_mRNA_PE100bp	Gu et al. Nat Comm 2016	27824051	EGAS00001001952
SJALL014887_D1	B-ALL	PAX5alt	NoFusion	12.8791	-63.9885	Stranded_total_RNA_PE75bp	NA	NA	phs000218
SJBALL030807_D1	B-ALL	PAX5alt	PAX5-FOXP1	15.5436	-65.7797	Stranded_total_RNA_PE125bp	this study	this study	EGAS00001004810
SJHYPO107_D	B-ALL	PAX5alt	PAX5-FBRSL1	6.33433	-63.726	Unstranded_mRNA_PE100bp	Gu et al. Nature Genetics 2019	30643249	EGAS00001003266
SJBALL020846_D1	B-ALL	PAX5alt	NoFusion	18.4276	-56.6668	Unstranded_mRNA_PE100bp	Gu et al. Nat Comm 2016	27824051	EGAS00001001952
SJBALL020599_D1	B-ALL	PAX5alt	PAX5-MBNL1;PPM1G-DCTN3	19.8742	-57.6185	Unstranded_mRNA_PE100bp	Gu et al. Nat Comm 2016	27824051	EGAS00001001952
SJBALL021486_D1	B-ALL	PAX5alt	MYH9-IL2RB	1.3575	-71.0757	Unstranded_mRNA_PE100bp	Roberts et al. NEJM 2014	25207766	EGAS00001000654
PARZYX	B-ALL	PAX5alt	PAX5-ETV6	26.1686	-64.2095	Stranded_total_RNA_PE75bp	NA	NA	phs000218
SJALL040091_D1	B-ALL	PAX5alt	PAX5-ETV6	21.3225	-62.8805	Stranded_total_RNA_PE100bp	Gu et al. Nature Genetics 2019	30643249	EGAS00001003266
SJBALL020729_D1	B-ALL	PAX5alt	PAX5-ETV6	23.1044	-61.4911	Unstranded_mRNA_PE100bp	Gu et al. Nat Comm 2016	27824051	EGAS00001001952
SJBALL015187_D1	B-ALL	PAX5alt	PAX5-ETV6	20.5431	-64.3002	Stranded_total_RNA_PE100bp	Gu et al. Nature Genetics 2019	30643249	EGAS00001003266
SJBALL201_D	B-ALL	PAX5alt	PAX5-ETV6	25.8912	-65.8966	Stranded_total_RNA_PE100bp	Gu et al. Nature Genetics 2019	30643249	EGAS00001003266
SJBALL030295_D1	B-ALL	PAX5alt	PAX5-ETV6	26.7556	-66.5979	Stranded_total_RNA_PE125bp	this study	this study	EGAS00001004810
PARJLA	B-ALL	PAX5alt	PAX5-ETV6	26.4014	-63.5531	Stranded_total_RNA_PE75bp	NA	NA	phs000218
SJBALL189_D	B-ALL	PAX5alt	PAX5-ETV6	26.1453	-65.5775	Stranded_total_RNA_PE100bp	Gu et al. Nature Genetics 2019	30643249	EGAS00001003266
SJALL014951_D1	B-ALL	PAX5alt	PAX5-ETV6;ATF7IP-RERG	21.0744	-63.4536	Stranded_total_RNA_PE100bp	Gu et al. Nature Genetics 2019	30643249	EGAS00001003266
SJBALL015160_D1	B-ALL	PAX5alt	PAX5-ETV6	24.3535	-65.1097	Stranded_total_RNA_PE100bp	Gu et al. Nature Genetics 2019	30643249	EGAS00001003266
SJBALL020764_D1	B-ALL	PAX5alt	PAX5-ETV6	24.4883	-63.2195	Unstranded_mRNA_PE100bp	Gu et al. Nat Comm 2016	27824051	EGAS00001001952
PASTSR	B-ALL	PAX5alt	PAX5-ETV6	25.5848	-62.7683	Stranded_total_RNA_PE75bp	NA	NA	phs000218
SJBALL015063_D1	B-ALL	PAX5alt	PAX5-ETV6	22.5268	-64.7548	Stranded_total_RNA_PE100bp	Gu et al. Nature Genetics 2019	30643249	EGAS00001003266
SJBALL022603_D1	B-ALL	PAX5alt	PAX5-ETV6	24.9387	-64.5834	Unstranded_mRNA_PE100bp	Gu et al. Nature Genetics 2019	30643249	EGAS00001003266
SJBALL021072_D1	B-ALL	PAX5alt	PAX5-ETV6	23.724	-63.3729	Unstranded_mRNA_PE100bp	Gu et al. Nature Genetics 2019	30643249	EGAS00001003266
SJALL055638_D1	B-ALL	PAX5alt	PAX5-ETV6;ITPR2-CASC1	24.7373	-66.4399	Stranded_total_RNA_PE100bp	this study	this study	EGAS00001004810
SJALL049965_D1	B-ALL	PAX5alt	PAX5-ETV6	21.8779	-65.9656	Stranded_total_RNA_PE100bp	Gu et al. Nature Genetics 2019	30643249	EGAS00001003266
PASDYM	B-ALL	PAX5alt	PAX5-ETV6	25.5869	-62.3056	Stranded_total_RNA_PE75bp	NA	NA	phs000218
SJBALL022607_D1	B-ALL	PAX5alt	PAX5-ETV6	23.8249	-61.4156	Unstranded_mRNA_PE100bp	Gu et al. Nature Genetics 2019	30643249	EGAS00001003266
SJBALL022605_D1	B-ALL	PAX5alt	PAX5-ETV6	24.3653	-62.0084	Unstranded_mRNA_PE100bp	Gu et al. Nature Genetics 2019	30643249	EGAS00001003266
SJALL059334_D1	B-ALL	Ph	BCR-ABL1;PAX5-PTPRD	-22.6473	-60.1362	Stranded_total_RNA_PE100bp	this study	this study	EGAS00001004810
SJALL057911_D1	B-ALL	Ph	BCR-ABL1	-22.2699	-59.3507	Stranded_total_RNA_PE100bp	this study	this study	EGAS00001004810
SJBALL013876_D1	B-ALL	Ph	BCR-ABL1	-45.224	-35.5765	Stranded_total_RNA_PE100bp	Gu et al. Nature Genetics 2019	30643249	EGAS00001003266
SJBALL020486_D2	B-ALL	Ph	BCR-ABL1	-21.2428	-56.9735	Stranded_total_RNA_PE75bp	NA	NA	phs000218
SJALL054556_D1	B-ALL	Ph	BCR-ABL1	-20.0659	-65.4098	Stranded_total_RNA_PE100bp	this study	this study	EGAS00001004810
SJBALL014115_D1	B-ALL	Ph	BCR-ABL1	-46.7216	-42.543	Stranded_total_RNA_PE100bp	Gu et al. Nat Comm 2016	27824051	EGAS00001001952
SJALL048708_D1	B-ALL	Ph	BCR-ABL1	-43.2025	-38.7813	Stranded_total_RNA_PE100bp	this study	this study	EGAS00001004810
SJBALL020863_D1	B-ALL	Ph	BCR-ABL1	-26.4041	-56.9847	Stranded_total_RNA_PE100bp	Gu et al. Nature Genetics 2019	30643249	EGAS00001003266
SJPHALL006_D	B-ALL	Ph	BCR-ABL1	-24.0352	-54.4437	Unstranded_mRNA_PE100bp	Gu et al. Nature Genetics 2019	30643249	EGAS00001003266
SJBALL020483_D2	B-ALL	Ph	BCR-ABL1	-46.3802	-36.6716	Stranded_total_RNA_PE75bp	NA	NA	phs000218
SJALL060392_D2	B-ALL	Ph	BCR-ABL1	-42.1704	-37.8167	Stranded_total_RNA_PE100bp	this study	this study	EGAS00001004810
SJBALL015158_D1	B-ALL	Ph	BCR-ABL1	-22.072	-73.5785	Stranded_total_RNA_PE100bp	Gu et al. Nature Genetics 2019	30643249	EGAS00001003266
SJALL061700_D1	B-ALL	Ph	BCR-ABL1	-23.4296	-61.9088	Stranded_total_RNA_PE100bp	this study	this study	EGAS00001004810
SJPHALL012_D	B-ALL	Ph	BCR-ABL1	-22.9621	-54.9263	Unstranded_mRNA_PE100bp	Topka et al. PLoS Genetics 2015	26102509	EGAS00001000447
SJALL047514_D1	B-ALL	Ph	BCR-ABL1	-44.9006	-40.3756	Stranded_total_RNA_PE100bp	this study	this study	EGAS00001004810
SJPHALL020036_D1	B-ALL	Ph	BCR-ABL1	-19.2891	-53.7923	Unstranded_mRNA_PE100bp	Topka et al. PLoS Genetics 2015	26102509	EGAS00001000447
SJALL048502_D1	B-ALL	Ph	BCR-ABL1	-20.9853	-68.9542	Stranded_total_RNA_PE100bp	Gu et al. Nature Genetics 2019	30643249	EGAS00001003266
SJPHALL020047_D1	B-ALL	Ph	BCR-ABL1	-46.3511	-39.5442	Unstranded_mRNA_PE100bp	Topka et al. PLoS Genetics 2015	26102509	EGAS00001000447
SJPHALL020046_D1	B-ALL	Ph	BCR-ABL1	-46.0824	-39.1026	Unstranded_mRNA_PE100bp	Topka et al. PLoS Genetics 2015	26102509	EGAS00001000447
SJHYPO121_D	B-ALL	Ph	BCR-ABL1	-22.5695	-72.194	Stranded_total_RNA_PE100bp	Gu et al. Nature Genetics 2019	30643249	EGAS00001003266
SJALL049684_D1	B-ALL	Ph	BCR-ABL1	-45.0071	-36.9634	Stranded_total_RNA_PE100bp	Gu et al. Nature Genetics 2019	30643249	EGAS00001003266
SJPHALL020033_D1	B-ALL	Ph	BCR-ABL1	-25.267	-56.4008	Unstranded_mRNA_PE100bp	Topka et al. PLoS Genetics 2015	26102509	EGAS00001000447
SJALL047975_D1	B-ALL	Ph	BCR-ABL1	-41.1546	-40.4387	Stranded_total_RNA_PE100bp	this study	this study	EGAS00001004810
SJBALL043683_D1	B-ALL	Ph	BCR-ABL1;TM7SF3-CUX2	-46.9022	-53.671	Stranded_total_RNA_PE100bp	Gu et al. Nature Genetics 2019	30643249	EGAS00001003266
SJBALL043680_D1	B-ALL	Ph	BCR-ABL1	-22.2967	-66.4722	Stranded_total_RNA_PE100bp	Gu et al. Nature Genetics 2019	30643249	EGAS00001003266
SJALL044299_D1	B-ALL	Ph	BCR-ABL1	-22.0026	-66.9292	Stranded_total_RNA_PE100bp	this study	this study	EGAS00001004810
SJBALL044897_D1	B-ALL	Ph	BCR-ABL1	-23.9858	-63.5447	Stranded_total_RNA_PE100bp	Gu et al. Nature Genetics 2019	30643249	EGAS00001003266
SJALL040074_D1	B-ALL	Ph	BCR-ABL1	-20.6835	-66.95	Stranded_total_RNA_PE100bp	Gu et al. Nature Genetics 2019	30643249	EGAS00001003266
SJALL060410_D2	B-ALL	Ph	BCR-ABL1	-45.8727	-35.7609	Stranded_total_RNA_PE100bp	this study	this study	EGAS00001004810
SJALL061948_D1	B-ALL	Ph	BCR-ABL1	-44.417	-37.2981	Stranded_total_RNA_PE100bp	this study	this study	EGAS00001004810
SJPHALL009_D	B-ALL	Ph	BCR-ABL1	-24.8462	-53.232	Unstranded_mRNA_PE100bp	Gu et al. Nature Genetics 2019	30643249	EGAS00001003266
SJBALL020337_D2	B-ALL	Ph	BCR-ABL1	-25.1735	-57.4032	Stranded_total_RNA_PE75bp	NA	NA	phs000218
SJPHALL013_D	B-ALL	Ph	BCR-ABL1	-24.2636	-55.2096	Unstranded_mRNA_PE100bp	Topka et al. PLoS Genetics 2015	26102509	EGAS00001000447
SJALL061959_D1	B-ALL	Ph	BCR-ABL1	-36.1145	-43.2855	Stranded_total_RNA_PE100bp	this study	this study	EGAS00001004810
SJPHALL010_D	B-ALL	Ph	BCR-ABL1	-48.1984	-34.5315	Unstranded_mRNA_PE100bp	Topka et al. PLoS Genetics 2015	26102509	EGAS00001000447
SJBALL013868_D1	B-ALL	Ph	BCR-ABL1	-44.4873	-38.4456	Stranded_total_RNA_PE100bp	Gu et al. Nature Genetics 2019	30643249	EGAS00001003266
SJALL060398_D1	B-ALL	Ph	BCR-ABL1	-20.4797	-63.5155	Stranded_total_RNA_PE100bp	this study	this study	EGAS00001004810
SJALL048677_D1	B-ALL	Ph	BCR-ABL1;BCAP31-SHE	-25.5922	-61.1093	Stranded_total_RNA_PE100bp	Gu et al. Nature Genetics 2019	30643249	EGAS00001003266
SJALL048505_D1	B-ALL	Ph	BCR-ABL1	-25.0671	-69.4033	Stranded_total_RNA_PE100bp	Gu et al. Nature Genetics 2019	30643249	EGAS00001003266
SJALL047972_D1	B-ALL	Ph	BCR-ABL1	-40.7957	-35.5571	Stranded_total_RNA_PE100bp	this study	this study	EGAS00001004810
SJALL016662_D1	B-ALL	Ph	BCR-ABL1	-25.2654	-59.2562	Stranded_total_RNA_PE100bp	Gu et al. Nature Genetics 2019	30643249	EGAS00001003266
SJPHALL027_D	B-ALL	Ph	BCR-ABL1	-25.3584	-54.968	Stranded_total_RNA_PE100bp	Gu et al. Nature Genetics 2019	30643249	EGAS00001003266
SJPHALL020044_D1	B-ALL	Ph	BCR-ABL1;TBC1D13-SLC2A11	-46.7983	-33.7539	Unstranded_mRNA_PE100bp	Topka et al. PLoS Genetics 2015	26102509	EGAS00001000447
SJBALL048068_D1	B-ALL	Ph	BCR-ABL1	-20.3063	-69.1383	Stranded_total_RNA_PE100bp	Gu et al. Nature Genetics 2019	30643249	EGAS00001003266
SJBALL046138_D1	B-ALL	Ph	BCR-ABL1;NEK6-DCK	-31.0048	-59.6816	Stranded_total_RNA_PE100bp	Gu et al. Nature Genetics 2019	30643249	EGAS00001003266
SJPHALL029_D	B-ALL	Ph	BCR-ABL1	-24.0026	-55.7632	Unstranded_mRNA_PE100bp	Topka et al. PLoS Genetics 2015	26102509	EGAS00001000447
SJALL058977_D1	B-ALL	Ph	BCR-ABL1	-24.0608	-69.5433	Stranded_total_RNA_PE100bp	this study	this study	EGAS00001004810
SJALL048507_D1	B-ALL	Ph	BCR-ABL1;IKZF1-DDC	-21.6098	-64.0417	Stranded_total_RNA_PE100bp	Gu et al. Nature Genetics 2019	30643249	EGAS00001003266
SJBALL043675_D1	B-ALL	Ph	BCR-ABL1	-24.0352	-72.9312	Stranded_total_RNA_PE100bp	Gu et al. Nature Genetics 2019	30643249	EGAS00001003266
SJALL044297_D1	B-ALL	Ph	BCR-ABL1	-23.5798	-72.7108	Stranded_total_RNA_PE100bp	this study	this study	EGAS00001004810
SJALL044292_D1	B-ALL	Ph	BCR-ABL1	-44.8814	-32.6465	Stranded_total_RNA_PE100bp	this study	this study	EGAS00001004810
SJBALL030344_D1	B-ALL	Ph	BCR-ABL1	-19.178	-72.4634	Stranded_total_RNA_PE125bp	this study	this study	EGAS00001004810
SJPHALL007_D	B-ALL	Ph	BCR-ABL1	-49.0647	-34.3336	Unstranded_mRNA_PE100bp	Gu et al. Nature Genetics 2019	30643249	EGAS00001003266
SJALL048501_D1	B-ALL	Ph	BCR-ABL1	-25.2382	-70.8034	Stranded_total_RNA_PE100bp	Gu et al. Nature Genetics 2019	30643249	EGAS00001003266
SJBALL016270_D1	B-ALL	Ph	BCR-ABL1	-21.5572	-61.5744	Stranded_total_RNA_PE100bp	Gu et al. Nat Comm 2016	27824051	EGAS00001001952
SJBALL047363_D1	B-ALL	Ph	BCR-ABL1	-50.2987	-36.0071	Stranded_total_RNA_PE100bp	Gu et al. Nature Genetics 2019	30643249	EGAS00001003266
SJBALL013873_D1	B-ALL	Ph	BCR-ABL1;EP400-NAV3	-22.4384	-74.5274	Stranded_total_RNA_PE100bp	Gu et al. Nature Genetics 2019	30643249	EGAS00001003266
SJALL059339_D1	B-ALL	Ph	BCR-ABL1	-40.8664	-38.9414	Stranded_total_RNA_PE100bp	this study	this study	EGAS00001004810
SJALL049680_D1	B-ALL	Ph	BCR-ABL1	-44.4011	-34.8594	Stranded_total_RNA_PE100bp	Gu et al. Nature Genetics 2019	30643249	EGAS00001003266
SJALL059325_D1	B-ALL	Ph	BCR-ABL1	-35.1011	-59.8872	Stranded_total_RNA_PE100bp	this study	this study	EGAS00001004810
SJALL061950_D1	B-ALL	Ph	BCR-ABL1	-24.2596	-68.1579	Stranded_total_RNA_PE100bp	this study	this study	EGAS00001004810
SJALL054525_D1	B-ALL	Ph	BCR-ABL1	-43.8964	-31.7501	Stranded_total_RNA_PE100bp	this study	this study	EGAS00001004810
SJBALL043684_D1	B-ALL	Ph	BCR-ABL1	-12.3662	-60.0595	Stranded_total_RNA_PE100bp	Gu et al. Nature Genetics 2019	30643249	EGAS00001003266
SJALL044304_D1	B-ALL	Ph	BCR-ABL1	-12.9141	-60.1901	Stranded_total_RNA_PE100bp	this study	this study	EGAS00001004810
SJALL049941_D1	B-ALL	Ph	BCR-ABL1	-24.9603	-74.689	Stranded_total_RNA_PE100bp	this study	this study	EGAS00001004810
SJPHALL015_D	B-ALL	Ph	BCR-ABL1	-22.6774	-52.8606	Unstranded_mRNA_PE100bp	Topka et al. PLoS Genetics 2015	26102509	EGAS00001000447
SJALL061956_D1	B-ALL	Ph	BCR-ABL1	-40.6706	-34.8086	Stranded_total_RNA_PE100bp	this study	this study	EGAS00001004810
SJALL047971_D1	B-ALL	Ph	BCR-ABL1	-41.3635	-36.0294	Stranded_total_RNA_PE100bp	this study	this study	EGAS00001004810
SJALL049485_D1	B-ALL	Ph	BCR-ABL1	-44.0003	-39.6746	Stranded_total_RNA_PE100bp	this study	this study	EGAS00001004810
SJALL048693_D1	B-ALL	Ph	BCR-ABL1	-21.4334	-63.0946	Stranded_total_RNA_PE100bp	Gu et al. Nature Genetics 2019	30643249	EGAS00001003266
SJBALL021107_D1	B-ALL	Ph	BCR-ABL1;AP2B1-SLFN11	-28.3117	-68.5552	Stranded_total_RNA_PE100bp	Gu et al. Nature Genetics 2019	30643249	EGAS00001003266
SJALL059326_D1	B-ALL	Ph	BCR-ABL1	-25.1765	-65.1299	Stranded_total_RNA_PE100bp	this study	this study	EGAS00001004810
SJALL049940_D1	B-ALL	Ph	BCR-ABL1	-16.6791	-60.6208	Stranded_total_RNA_PE100bp	Gu et al. Nature Genetics 2019	30643249	EGAS00001003266
SJBALL030414_D1	B-ALL	Ph	BCR-ABL1	-28.4724	-58.6275	Stranded_total_RNA_PE125bp	this study	this study	EGAS00001004810
SJALL054459_D1	B-ALL	Ph	BCR-ABL1	-21.56	-72.8253	Stranded_total_RNA_PE100bp	Gu et al. Nature Genetics 2019	30643249	EGAS00001003266
SJBALL020637_D1	B-ALL	Ph	BCR-ABL1	-25.805	-70.9744	Stranded_total_RNA_PE100bp	Gu et al. Nature Genetics 2019	30643249	EGAS00001003266
SJALL048084_D1	B-ALL	Ph	BCR-ABL1	-27.0283	-55.8997	Stranded_total_RNA_PE100bp	this study	this study	EGAS00001004810
SJBALL013914_D1	B-ALL	Ph	BCR-ABL1	-21.6543	-75.4444	Stranded_total_RNA_PE100bp	Gu et al. Nature Genetics 2019	30643249	EGAS00001003266
SJPHALL021_D	B-ALL	Ph	BCR-ABL1	-47.8501	-33.7417	Unstranded_mRNA_PE100bp	Topka et al. PLoS Genetics 2015	26102509	EGAS00001000447
SJALL048514_D1	B-ALL	Ph	BCR-ABL1	-18.096	-60.5759	Stranded_total_RNA_PE100bp	Gu et al. Nature Genetics 2019	30643249	EGAS00001003266
SJALL055625_D1	B-ALL	Ph	BCR-ABL1	-44.2448	-33.8077	Stranded_total_RNA_PE100bp	this study	this study	EGAS00001004810
SJALL054466_D1	B-ALL	Ph	BCR-ABL1	-24.5358	-61.5429	Stranded_total_RNA_PE100bp	Gu et al. Nature Genetics 2019	30643249	EGAS00001003266
SJBALL030108_D1	B-ALL	Ph	BCR-ABL1	-19.7734	-72.3309	Stranded_total_RNA_PE125bp	this study	this study	EGAS00001004810
SJALL055647_D1	B-ALL	Ph	BCR-ABL1;NARS2-NDUFC2	-20.6069	-72.7533	Stranded_total_RNA_PE100bp	this study	this study	EGAS00001004810
SJBALL014187_D1	B-ALL	Ph	BCR-ABL1	-46.6591	-32.5509	Stranded_total_RNA_PE100bp	Gu et al. Nat Comm 2016	27824051	EGAS00001001952
SJALL059343_D1	B-ALL	Ph	BCR-ABL1	-22.7267	-76.2571	Stranded_total_RNA_PE100bp	this study	this study	EGAS00001004810
SJPHALL020_D	B-ALL	Ph	BCR-ABL1	-47.9641	-32.6912	Unstranded_mRNA_PE100bp	Topka et al. PLoS Genetics 2015	26102509	EGAS00001000447
SJALL061951_D1	B-ALL	Ph	BCR-ABL1;AVL9-PRR15	-43.5561	-35.2791	Stranded_total_RNA_PE100bp	this study	this study	EGAS00001004810
SJBALL020669_D1	B-ALL	Ph	BCR-ABL1	-27.0814	-59.5526	Stranded_total_RNA_PE100bp	Gu et al. Nature Genetics 2019	30643249	EGAS00001003266
SJALL048158_D1	B-ALL	Ph	BCR-ABL1	-21.3362	-65.5276	Stranded_total_RNA_PE100bp	this study	this study	EGAS00001004810
SJALL060697_D1	B-ALL	Ph	BCR-ABL1	-40.6075	-37.5875	Stranded_total_RNA_PE100bp	this study	this study	EGAS00001004810
SJBALL044889_D1	B-ALL	Ph	BCR-ABL1	-43.9282	-36.2535	Stranded_total_RNA_PE100bp	Gu et al. Nature Genetics 2019	30643249	EGAS00001003266
SJALL050544_D1	B-ALL	Ph	BCR-ABL1;IGH-MYC	-23.6606	-64.6337	Stranded_total_RNA_PE100bp	this study	this study	EGAS00001004810
SJALL054544_D1	B-ALL	Ph	BCR-ABL1;ZNF106-AC012651.1	-18.1609	-59.3189	Stranded_total_RNA_PE100bp	this study	this study	EGAS00001004810
SJALL059331_D1	B-ALL	Ph	BCR-ABL1	-20.4583	-60.5661	Stranded_total_RNA_PE100bp	this study	this study	EGAS00001004810
SJALL055897_D1	B-ALL	Ph	BCR-ABL1	-30.8167	-63.0007	Stranded_total_RNA_PE100bp	this study	this study	EGAS00001004810
SJBALL048078_D1	B-ALL	Ph	BCR-ABL1	-23.752	-74.2347	Stranded_total_RNA_PE100bp	Gu et al. Nature Genetics 2019	30643249	EGAS00001003266
SJALL054560_D1	B-ALL	Ph	BCR-ABL1	-24.4844	-76.9974	Stranded_total_RNA_PE100bp	this study	this study	EGAS00001004810
SJALL060151_D1	B-ALL	Ph	BCR-ABL1	-42.5967	-41.8202	Stranded_total_RNA_PE100bp	this study	this study	EGAS00001004810
SJALL059349_D1	B-ALL	Ph	BCR-ABL1	-42.634	-40.6439	Stranded_total_RNA_PE100bp	this study	this study	EGAS00001004810
SJALL054553_D1	B-ALL	Ph	BCR-ABL1	-23.5325	-75.7838	Stranded_total_RNA_PE100bp	this study	this study	EGAS00001004810
SJBALL013922_D1	B-ALL	Ph	BCR-ABL1	-21.4199	-74.5455	Stranded_total_RNA_PE100bp	Gu et al. Nature Genetics 2019	30643249	EGAS00001003266
SJALL060146_D1	B-ALL	Ph	BCR-ABL1	-38.6976	-38.1792	Stranded_total_RNA_PE100bp	this study	this study	EGAS00001004810
SJALL055653_D1	B-ALL	Ph	BCR-ABL1;IKZF1-IGK	-24.0524	-76.5903	Stranded_total_RNA_PE100bp	this study	this study	EGAS00001004810
SJBALL046128_D1	B-ALL	Ph	BCR-ABL1	-45.2892	-70.3206	Stranded_total_RNA_PE100bp	this study	this study	EGAS00001004810
SJALL048503_D1	B-ALL	Ph	BCR-ABL1	-47.7909	-41.3957	Stranded_total_RNA_PE100bp	Gu et al. Nature Genetics 2019	30643249	EGAS00001003266
SJPHALL020037_D1	B-ALL	Ph	BCR-ABL1	-17.8863	-62.8951	Unstranded_mRNA_PE100bp	Topka et al. PLoS Genetics 2015	26102509	EGAS00001000447
SJBALL013977_D1	B-ALL	Ph	BCR-ABL1	-50.8203	-35.855	Stranded_total_RNA_PE100bp	Gu et al. Nat Comm 2016	27824051	EGAS00001001952
SJALL059514_D1	B-ALL	Ph	BCR-ABL1	-22.8444	-53.4918	Stranded_total_RNA_PE100bp	this study	this study	EGAS00001004810
SJBALL047030_D1	B-ALL	Ph	BCR-ABL1	-16.1316	-57.3816	Stranded_total_RNA_PE100bp	Gu et al. Nature Genetics 2019	30643249	EGAS00001003266
SJALL054539_D1	B-ALL	Ph	BCR-ABL1;C8ORF76-DERL1	-18.6407	-70.1465	Stranded_total_RNA_PE100bp	this study	this study	EGAS00001004810
SJALL061696_D1	B-ALL	Ph	BCR-ABL1	-43.3469	-40.0728	Stranded_total_RNA_PE100bp	this study	this study	EGAS00001004810
SJALL061704_D1	B-ALL	Ph	BCR-ABL1	-18.1826	-69.9606	Stranded_total_RNA_PE100bp	this study	this study	EGAS00001004810
SJBALL021737_D1	B-ALL	Ph	BCR-ABL1	-41.6891	-43.3516	Unstranded_mRNA_PE100bp	Gu et al. Nature Genetics 2019	30643249	EGAS00001003266
SJBALL022259_D1	B-ALL	Ph	BCR-ABL1	-12.4432	-58.3088	Stranded_total_RNA_PE100bp	Gu et al. Nature Genetics 2019	30643249	EGAS00001003266
SJALL054532_D1	B-ALL	Ph	BCR-ABL1	-38.618	-39.8622	Stranded_total_RNA_PE100bp	this study	this study	EGAS00001004810
SJALL044310_D1	B-ALL	Ph	BCR-ABL1;IGH-CRLF2	-34.6659	-39.9778	Stranded_total_RNA_PE100bp	this study	this study	EGAS00001004810
SJBALL043640_D1	B-ALL	Ph	BCR-ABL1	-27.2817	-57.3345	Stranded_total_RNA_PE100bp	Gu et al. Nature Genetics 2019	30643249	EGAS00001003266
SJALL060400_D1	B-ALL	Ph	BCR-ABL1	-18.3319	-59.8533	Stranded_total_RNA_PE100bp	this study	this study	EGAS00001004810
SJBALL013871_D1	B-ALL	Ph	BCR-ABL1	-21.0152	-59.404	Stranded_total_RNA_PE100bp	Gu et al. Nat Comm 2016	27824051	EGAS00001001952
SJALL059544_D1	B-ALL	Ph	BCR-ABL1	-42.418	-33.1252	Stranded_total_RNA_PE100bp	this study	this study	EGAS00001004810
SJBALL014221_D1	B-ALL	Ph	BCR-ABL1	-46.1543	-32.864	Stranded_total_RNA_PE100bp	Gu et al. Nat Comm 2016	27824051	EGAS00001001952
SJALL049673_D1	B-ALL	Ph	BCR-ABL1	-29.8497	-61.6743	Stranded_total_RNA_PE100bp	Gu et al. Nature Genetics 2019	30643249	EGAS00001003266
SJBALL013840_D1	B-ALL	Ph	BCR-ABL1;TRA2B-RAB7A	-48.0713	-37.9437	Stranded_total_RNA_PE100bp	Gu et al. Nature Genetics 2019	30643249	EGAS00001003266
SJALL047967_D1	B-ALL	Ph	BCR-ABL1	-34.2169	-39.6658	Stranded_total_RNA_PE100bp	this study	this study	EGAS00001004810
SJPHALL003_D	B-ALL	Ph	BCR-ABL1;MYB-AHI1;AHI1-OCA2	-26.3043	-64.9058	Unstranded_mRNA_PE100bp	Gu et al. Nature Genetics 2019	30643249	EGAS00001003266
SJBALL020468_D1	B-ALL	Ph	BCR-ABL1	-25.1925	-71.9493	Stranded_total_RNA_PE100bp	Gu et al. Nature Genetics 2019	30643249	EGAS00001003266
SJALL054561_D1	B-ALL	Ph	BCR-ABL1	-30.6737	-62.0217	Stranded_total_RNA_PE100bp	this study	this study	EGAS00001004810
SJBALL030889_D1	B-ALL	Ph	BCR-ABL1	-43.8845	-41.7874	Stranded_total_RNA_PE125bp	this study	this study	EGAS00001004810
SJALL054530_D1	B-ALL	Ph	BCR-ABL1	-27.3126	-60.821	Stranded_total_RNA_PE100bp	this study	this study	EGAS00001004810
SJALL054533_D1	B-ALL	Ph	BCR-ABL1	-16.224	-57.468	Stranded_total_RNA_PE100bp	this study	this study	EGAS00001004810
SJBALL013877_D1	B-ALL	Ph	BCR-ABL1;PTPN1-TRA	-21.5544	-58.3114	Stranded_total_RNA_PE100bp	Gu et al. Nature Genetics 2019	30643249	EGAS00001003266
SJBALL044895_D1	B-ALL	Ph	BCR-ABL1	-22.1929	-70.5967	Stranded_total_RNA_PE100bp	Gu et al. Nature Genetics 2019	30643249	EGAS00001003266
SJBALL030734_D1	B-ALL	Ph	BCR-ABL1	-24.0142	-58.8375	Stranded_total_RNA_PE125bp	this study	this study	EGAS00001004810
SJALL015944_D1	B-ALL	Ph	BCR-ABL1	-25.957	-59.1754	Stranded_total_RNA_PE100bp	Gu et al. Nature Genetics 2019	30643249	EGAS00001003266
SJALL054550_D1	B-ALL	Ph	BCR-ABL1	-33.4304	-63.9696	Stranded_total_RNA_PE100bp	this study	this study	EGAS00001004810
SJPHALL020038_D1	B-ALL	Ph	BCR-ABL1	-19.0522	-57.0373	Unstranded_mRNA_PE100bp	Topka et al. PLoS Genetics 2015	26102509	EGAS00001000447
SJALL061270_R1	B-ALL	Ph	BCR-ABL1	-17.0129	-64.7263	Stranded_total_RNA_PE100bp	this study	this study	EGAS00001004810
SJALL060688_D1	B-ALL	Ph	BCR-ABL1	-43.013	-34.037	Stranded_total_RNA_PE100bp	this study	this study	EGAS00001004810
SJBALL013836_D1	B-ALL	Ph	BCR-ABL1	-18.3863	-63.3284	Stranded_total_RNA_PE100bp	Gu et al. Nature Genetics 2019	30643249	EGAS00001003266
SJBALL016645_D2	B-ALL	Ph	BCR-ABL1	-20.4983	-54.6869	Stranded_total_RNA_PE100bp	Gu et al. Nature Genetics 2019	30643249	EGAS00001003266
SJBALL013832_D1	B-ALL	Ph	BCR-ABL1	-43.3782	-36.8528	Stranded_total_RNA_PE100bp	Gu et al. Nature Genetics 2019	30643249	EGAS00001003266
SJBALL021015_D1	B-ALL	Ph	BCR-ABL1	-25.6339	-59.7137	Stranded_total_RNA_PE100bp	Gu et al. Nature Genetics 2019	30643249	EGAS00001003266
SJBALL013850_D1	B-ALL	Ph	BCR-ABL1	-42.3718	-39.0145	Stranded_total_RNA_PE100bp	Gu et al. Nature Genetics 2019	30643249	EGAS00001003266
SJBALL022070_D1	B-ALL	Ph	BCR-ABL1	-19.992	-57.1567	Stranded_total_RNA_PE100bp	Gu et al. Nature Genetics 2019	30643249	EGAS00001003266
SJALL040055_D1	B-ALL	TCF3-PBX1	TCF3-PBX1	91.4547	-50.9952	Stranded_total_RNA_PE100bp	Gu et al. Nature Genetics 2019	30643249	EGAS00001003266
SJALL018303_D4	B-ALL	TCF3-PBX1	TCF3-PBX1	94.1829	-52.6729	Stranded_total_RNA_PE100bp	this study	this study	EGAS00001004810
SJE2A038_D	B-ALL	TCF3-PBX1	TCF3-PBX1	87.9907	-53.9755	Unstranded_mRNA_PE100bp	Gu et al. Nature Genetics 2019	30643249	EGAS00001003266
SJBALL020175_D1	B-ALL	TCF3-PBX1	TCF3-PBX1	88.0698	-46.2704	Stranded_total_RNA_PE100bp	Gu et al. Nature Genetics 2019	30643249	EGAS00001003266
SJALL054497_D1	B-ALL	TCF3-PBX1	TCF3-PBX1	91.8311	-46.7273	Stranded_total_RNA_PE100bp	Gu et al. Nature Genetics 2019	30643249	EGAS00001003266
SJBALL020848_D1	B-ALL	TCF3-PBX1	TCF3-PBX1	86.3005	-44.1081	Unstranded_mRNA_PE100bp	Gu et al. Nat Comm 2016	27824051	EGAS00001001952
SJALL048153_D1	B-ALL	TCF3-PBX1	TCF3-PBX1	89.4675	-48.7522	Stranded_total_RNA_PE100bp	this study	this study	EGAS00001004810
SJBALL020645_D1	B-ALL	TCF3-PBX1	TCF3-PBX1	85.8399	-42.3288	Unstranded_mRNA_PE100bp	Gu et al. Nat Comm 2016	27824051	EGAS00001001952
SJBALL043825_D1	B-ALL	TCF3-PBX1	TCF3-PBX1	89.0638	-46.9699	Stranded_total_RNA_PE100bp	this study	this study	EGAS00001004810
SJALL059327_D1	B-ALL	TCF3-PBX1	TCF3-PBX1	87.1517	-48.1365	Stranded_total_RNA_PE100bp	this study	this study	EGAS00001004810
SJBALL000013_D1	B-ALL	TCF3-PBX1	TCF3-PBX1	87.4288	-54.6252	Unstranded_mRNA_PE100bp	Gu et al. Nature Genetics 2019	30643249	EGAS00001003266
SJBALL016278_D1	B-ALL	TCF3-PBX1	TCF3-PBX1	88.2424	-48.3935	Stranded_total_RNA_PE100bp	Gu et al. Nat Comm 2016	27824051	EGAS00001001952
SJE2A006_D	B-ALL	TCF3-PBX1	TCF3-PBX1	92.2416	-51.5412	Stranded_total_RNA_PE100bp	Gu et al. Nature Genetics 2019	30643249	EGAS00001003266
SJE2A007_D	B-ALL	TCF3-PBX1	TCF3-PBX1	90.59	-53.8511	Stranded_total_RNA_PE100bp	this study	this study	EGAS00001004810
SJALL040070_D1	B-ALL	TCF3-PBX1	TCF3-PBX1	92.6175	-48.3162	Stranded_total_RNA_PE100bp	Gu et al. Nature Genetics 2019	30643249	EGAS00001003266
SJE2A043_D	B-ALL	TCF3-PBX1	TCF3-PBX1	88.892	-54.4524	Unstranded_mRNA_PE100bp	Gu et al. Nature Genetics 2019	30643249	EGAS00001003266
SJBALL015148_D1	B-ALL	TCF3-PBX1	TCF3-PBX1	92.9126	-46.1254	Stranded_total_RNA_PE100bp	Gu et al. Nature Genetics 2019	30643249	EGAS00001003266
SJE2A008_D	B-ALL	TCF3-PBX1	TCF3-PBX1	93.0362	-53.5148	Stranded_total_RNA_PE100bp	Gu et al. Nature Genetics 2019	30643249	EGAS00001003266
SJE2A003805_D2	B-ALL	TCF3-PBX1	TCF3-PBX1	93.5152	-51.4897	Stranded_total_RNA_PE100bp	Gu et al. Nature Genetics 2019	30643249	EGAS00001003266
SJE2A018_D	B-ALL	TCF3-PBX1	TCF3-PBX1	88.279	-54.8809	Unstranded_mRNA_PE100bp	Gu et al. Nature Genetics 2019	30643249	EGAS00001003266
SJBALL020650_D1	B-ALL	TCF3-PBX1	TCF3-PBX1	86.3056	-42.9235	Unstranded_mRNA_PE100bp	Gu et al. Nat Comm 2016	27824051	EGAS00001001952
SJE2A001_D	B-ALL	TCF3-PBX1	TCF3-PBX1	91.4207	-54.4923	Stranded_total_RNA_PE100bp	this study	this study	EGAS00001004810
SJE2A067_D	B-ALL	TCF3-PBX1	TCF3-PBX1	88.6941	-52.2356	Stranded_total_RNA_PE100bp	Gu et al. Nature Genetics 2019	30643249	EGAS00001003266
SJBALL021242_D2	B-ALL	TCF3-PBX1	TCF3-PBX1	90.3649	-42.1891	Stranded_total_RNA_PE75bp	NA	NA	phs000218
SJE2A024_D	B-ALL	TCF3-PBX1	TCF3-PBX1	89.7185	-52.7491	Stranded_total_RNA_PE100bp	Gu et al. Nature Genetics 2019	30643249	EGAS00001003266
SJALL059348_D1	B-ALL	TCF3-PBX1	TCF3-PBX1	95.6425	-49.8857	Stranded_total_RNA_PE100bp	this study	this study	EGAS00001004810
SJE2A040_D	B-ALL	TCF3-PBX1	TCF3-PBX1;RNGTT-EYS	88.4447	-56.468	Unstranded_mRNA_PE100bp	Gu et al. Nature Genetics 2019	30643249	EGAS00001003266
SJE2A037_D	B-ALL	TCF3-PBX1	TCF3-PBX1	89.1254	-55.3882	Unstranded_mRNA_PE100bp	Gu et al. Nature Genetics 2019	30643249	EGAS00001003266
SJCOGALL010883_D2	B-ALL	TCF3-PBX1	TCF3-PBX1	84.3045	-42.8188	Stranded_total_RNA_PE75bp	NA	NA	phs000218
SJALL054475_D1	B-ALL	TCF3-PBX1	TCF3-PBX1	91.5623	-48.9842	Stranded_total_RNA_PE100bp	Gu et al. Nature Genetics 2019	30643249	EGAS00001003266
SJE2A059_D	B-ALL	TCF3-PBX1	TCF3-PBX1	90.5424	-55.609	Unstranded_mRNA_PE100bp	Gu et al. Nature Genetics 2019	30643249	EGAS00001003266
SJBALL020336_D2	B-ALL	TCF3-PBX1	TCF3-PBX1	90.3927	-39.8474	Stranded_total_RNA_PE75bp	NA	NA	phs000218
SJALL049984_D1	B-ALL	TCF3-PBX1	TCF3-PBX1	90.6239	-47.3377	Stranded_total_RNA_PE100bp	Gu et al. Nature Genetics 2019	30643249	EGAS00001003266
SJETV003804_D2	B-ALL	TCF3-PBX1	TCF3-PBX1	92.8979	-55.0408	Stranded_total_RNA_PE100bp	Gu et al. Nature Genetics 2019	30643249	EGAS00001003266
SJALL054467_D1	B-ALL	TCF3-PBX1	TCF3-PBX1	88.5312	-47.3726	Stranded_total_RNA_PE100bp	Gu et al. Nature Genetics 2019	30643249	EGAS00001003266
SJBALL015121_D1	B-ALL	TCF3-PBX1	TCF3-PBX1	81.0349	-48.0733	Stranded_total_RNA_PE100bp	Gu et al. Nature Genetics 2019	30643249	EGAS00001003266
SJE2A060_D	B-ALL	TCF3-PBX1	TCF3-PBX1	81.9402	-45.0588	Unstranded_mRNA_PE100bp	Gu et al. Nature Genetics 2019	30643249	EGAS00001003266
SJALL048681_D1	B-ALL	TCF3-PBX1	TCF3-PBX1	91.7333	-45.7941	Stranded_total_RNA_PE100bp	Gu et al. Nature Genetics 2019	30643249	EGAS00001003266
SJBALL016285_D1	B-ALL	TCF3-PBX1	TCF3-PBX1	86.3953	-46.1598	Stranded_total_RNA_PE100bp	Gu et al. Nat Comm 2016	27824051	EGAS00001001952
SJCOGALL010233_D3	B-ALL	TCF3-PBX1	TCF3-PBX1	85.6162	-40.2206	Stranded_total_RNA_PE75bp	NA	NA	phs000218
SJALL060148_D1	B-ALL	TCF3-PBX1	TCF3-PBX1	89.3283	-49.4729	Stranded_total_RNA_PE100bp	this study	this study	EGAS00001004810
SJE2A003801_D2	B-ALL	TCF3-PBX1	TCF3-PBX1;PAX5-ETV6	89.6271	-51.2354	Stranded_total_RNA_PE100bp	Gu et al. Nature Genetics 2019	30643249	EGAS00001003266
SJBALL021258_D2	B-ALL	TCF3-PBX1	TCF3-PBX1	88.8417	-41.1901	Stranded_total_RNA_PE75bp	NA	NA	phs000218
SJE2A063_D	B-ALL	TCF3-PBX1	TCF3-PBX1	92.0728	-53.6573	Stranded_total_RNA_PE100bp	Gu et al. Nature Genetics 2019	30643249	EGAS00001003266
SJBALL021189_D2	B-ALL	TCF3-PBX1	TCF3-PBX1	86.181	-53.3137	Stranded_total_RNA_PE75bp	NA	NA	phs000218
SJALL049994_D1	B-ALL	TCF3-PBX1	TCF3-PBX1	83.162	-48.9972	Stranded_total_RNA_PE100bp	Gu et al. Nature Genetics 2019	30643249	EGAS00001003266
SJALL054498_D1	B-ALL	TCF3-PBX1	TCF3-PBX1	84.0695	-47.9209	Stranded_total_RNA_PE100bp	Gu et al. Nature Genetics 2019	30643249	EGAS00001003266
SJBALL020603_D1	B-ALL	TCF3-PBX1	TCF3-PBX1	91.9666	-42.4701	Unstranded_mRNA_PE100bp	Gu et al. Nat Comm 2016	27824051	EGAS00001001952
SJE2A003_D	B-ALL	TCF3-PBX1	TCF3-PBX1	87.6217	-50.276	Stranded_total_RNA_PE100bp	Gu et al. Nature Genetics 2019	30643249	EGAS00001003266
SJE2A019_D	B-ALL	TCF3-PBX1	TCF3-PBX1	91.0879	-51.9099	Stranded_total_RNA_PE100bp	Gu et al. Nature Genetics 2019	30643249	EGAS00001003266
SJBALL020696_D1	B-ALL	TCF3-PBX1	TCF3-PBX1	84.1311	-44.3214	Unstranded_mRNA_PE100bp	Gu et al. Nat Comm 2016	27824051	EGAS00001001952
SJBALL015181_D1	B-ALL	TCF3-PBX1	TCF3-PBX1	81.5378	-47.6963	Stranded_total_RNA_PE100bp	Gu et al. Nature Genetics 2019	30643249	EGAS00001003266
SJALL054558_D1	B-ALL	TCF3-PBX1	TCF3-PBX1	92.0676	-45.0817	Stranded_total_RNA_PE100bp	this study	this study	EGAS00001004810
SJALL057954_D1	B-ALL	TCF3-PBX1	TCF3-PBX1	92.7603	-52.1216	Stranded_total_RNA_PE100bp	this study	this study	EGAS00001004810
SJE2A002_D	B-ALL	TCF3-PBX1	TCF3-PBX1	90.6216	-53.0053	Stranded_total_RNA_PE100bp	Gu et al. Nature Genetics 2019	30643249	EGAS00001003266
SJE2A066_D	B-ALL	TCF3-PBX1	TCF3-PBX1	91.3834	-53.2961	Stranded_total_RNA_PE100bp	Gu et al. Nature Genetics 2019	30643249	EGAS00001003266
SJALL047969_D1	B-ALL	TCF3-PBX1	TCF3-PBX1	82.216	-48.3874	Stranded_total_RNA_PE100bp	this study	this study	EGAS00001004810
SJALL016664_D1	B-ALL	TCF3-PBX1	TCF3-PBX1	90.566	-44.4421	Stranded_total_RNA_PE100bp	Gu et al. Nature Genetics 2019	30643249	EGAS00001003266
SJCOGALL010905_D2	B-ALL	TCF3-PBX1	TCF3-PBX1	83.055	-44.7802	Stranded_total_RNA_PE75bp	NA	NA	phs000218
SJBALL016274_D1	B-ALL	TCF3-PBX1	TCF3-PBX1	93.7768	-48.4921	Stranded_total_RNA_PE100bp	Gu et al. Nat Comm 2016	27824051	EGAS00001001952
SJBALL021256_D2	B-ALL	TCF3-PBX1	TCF3-PBX1	86.3015	-41.7702	Stranded_total_RNA_PE75bp	NA	NA	phs000218
SJBALL030893_D1	B-ALL	TCF3-PBX1	TCF3-PBX1	91.105	-40.5275	Stranded_total_RNA_PE125bp	this study	this study	EGAS00001004810
SJALL050011_D1	B-ALL	TCF3-PBX1	TCF3-PBX1	84.9099	-48.4344	Stranded_total_RNA_PE100bp	Gu et al. Nature Genetics 2019	30643249	EGAS00001003266
SJALL040066_D1	B-ALL	TCF3-PBX1	TCF3-PBX1	89.087	-44.7122	Stranded_total_RNA_PE100bp	Gu et al. Nature Genetics 2019	30643249	EGAS00001003266
SJE2A065_D	B-ALL	TCF3-PBX1	TCF3-PBX1	88.1617	-45.3128	Stranded_total_RNA_PE100bp	Gu et al. Nature Genetics 2019	30643249	EGAS00001003266
SJBALL015052_D1	B-ALL	TCF3-PBX1	TCF3-PBX1	90.6315	-45.9848	Stranded_total_RNA_PE100bp	Gu et al. Nature Genetics 2019	30643249	EGAS00001003266
SJCOGALL010239_R1	B-ALL	TCF3-PBX1	TCF3-PBX1	82.7045	-42.826	Stranded_total_RNA_PE75bp	NA	NA	TARGET ALL Phase 2
SJCOGALL010238_D3	B-ALL	TCF3-PBX1	TCF3-PBX1	83.4438	-44.7038	Stranded_total_RNA_PE75bp	NA	NA	phs000218
SJBALL016294_D1	B-ALL	TCF3-PBX1	TCF3-PBX1	92.6966	-50.4645	Stranded_total_RNA_PE100bp	Gu et al. Nat Comm 2016	27824051	EGAS00001001952
SJE2A062_D	B-ALL	TCF3-PBX1	TCF3-PBX1	88.1471	-50.3159	Stranded_total_RNA_PE100bp	Gu et al. Nature Genetics 2019	30643249	EGAS00001003266
SJBALL042308_D1	B-ALL	TCF3-PBX1	TCF3-PBX1	94.965	-44.4929	Stranded_total_RNA_PE100bp	Gu et al. Nature Genetics 2019	30643249	EGAS00001003266
SJALL016809_D1	B-ALL	TCF3-PBX1	TCF3-PBX1	91.5732	-43.9961	Stranded_total_RNA_PE100bp	this study	this study	EGAS00001004810
SJALL015973_D1	B-ALL	TCF3-PBX1	TCF3-PBX1	93.3617	-46.8478	Stranded_total_RNA_PE100bp	Gu et al. Nature Genetics 2019	30643249	EGAS00001003266
SJBALL030928_D1	B-ALL	TCF3-PBX1	TCF3-PBX1	93.6648	-42.458	Stranded_total_RNA_PE125bp	this study	this study	EGAS00001004810
SJE2A023_D	B-ALL	TCF3-PBX1	TCF3-PBX1;PAX5-LINC01400	85.77	-52.0757	Stranded_total_RNA_PE100bp	Gu et al. Nature Genetics 2019	30643249	EGAS00001003266
SJBALL044886_D1	B-ALL	TCF3-PBX1	TCF3-PBX1	89.7843	-43.3146	Stranded_total_RNA_PE100bp	Gu et al. Nature Genetics 2019	30643249	EGAS00001003266
SJE2A025_D	B-ALL	TCF3-PBX1	TCF3-PBX1	87.7007	-52.0787	Stranded_total_RNA_PE100bp	Gu et al. Nature Genetics 2019	30643249	EGAS00001003266
SJBALL021223_D2	B-ALL	TCF3-PBX1	TCF3-PBX1	83.4429	-41.0664	Stranded_total_RNA_PE75bp	NA	NA	phs000218
SJE2A032_D	B-ALL	TCF3-PBX1	TCF3-PBX1	93.1618	-44.0148	Stranded_total_RNA_PE100bp	Gu et al. Nature Genetics 2019	30643249	EGAS00001003266
SJE2A030_D	B-ALL	TCF3-PBX1	TCF3-PBX1	86.494	-50.3103	Stranded_total_RNA_PE100bp	Gu et al. Nature Genetics 2019	30643249	EGAS00001003266
SJBALL020822_D1	B-ALL	TCF3-PBX1	TCF3-PBX1	87.4016	-42.2592	Unstranded_mRNA_PE100bp	Gu et al. Nat Comm 2016	27824051	EGAS00001001952
SJE2A009_D	B-ALL	TCF3-PBX1	TCF3-PBX1	84.7301	-49.4276	Stranded_total_RNA_PE100bp	Gu et al. Nature Genetics 2019	30643249	EGAS00001003266
SJE2A035_D	B-ALL	TCF3-PBX1	TCF3-PBX1	88.7161	-43.838	Stranded_total_RNA_PE100bp	Gu et al. Nature Genetics 2019	30643249	EGAS00001003266
SJCOGALL010231_D3	B-ALL	TCF3-PBX1	TCF3-PBX1	84.8516	-41.5441	Stranded_total_RNA_PE75bp	NA	NA	phs000218
SJALL050839_D1	B-ALL	TCF3-PBX1	TCF3-PBX1	82.8817	-40.6772	Stranded_total_RNA_PE100bp	this study	this study	EGAS00001004810
SJALL014952_D1	B-ALL	TCF3-PBX1	TCF3-PBX1	89.8945	-45.5272	Stranded_total_RNA_PE100bp	Gu et al. Nature Genetics 2019	30643249	EGAS00001003266
SJBALL021260_D2	B-ALL	TCF3-PBX1	TCF3-PBX1;SPI1-TRAC;XIST-TBL1XR1	89.0109	-41.4506	Stranded_total_RNA_PE75bp	NA	NA	phs000218
SJALL054508_D1	B-ALL	ZEB2/CEBPE	IGH-CEBPE	24.292	-2.87961	Stranded_total_RNA_PE100bp	Gu et al. Nature Genetics 2019	30643249	EGAS00001003266
SJBALL020113_D1	B-ALL	ZEB2/CEBPE	CEBPB-AS1-IGH(ZEB2	24.7584	-1.05191	Unstranded_mRNA_PE100bp	Gu et al. Nat Comm 2016	27824051	EGAS00001001952
SJBALL020837_D1	B-ALL	ZEB2/CEBPE	NoFusion(ZEB2	23.1391	-0.885905	Unstranded_mRNA_PE100bp	Gu et al. Nat Comm 2016	27824051	EGAS00001001952
SJBALL093_D	B-ALL	ZEB2/CEBPE	CEBPE-IGH	22.3104	-4.14546	Stranded_total_RNA_PE100bp	Gu et al. Nature Genetics 2019	30643249	EGAS00001003266
SJALL061712_D1	B-ALL	ZEB2/CEBPE	CEBPE-IGH	21.3611	-2.21305	Stranded_total_RNA_PE100bp	this study	this study	EGAS00001004810
SJALL049995_D1	B-ALL	ZEB2/CEBPE	NoFusion(ZEB2.H1038R)	25.0246	-2.09875	Stranded_total_RNA_PE100bp	Gu et al. Nature Genetics 2019	30643249	EGAS00001003266
SJBALL020173_D1	B-ALL	ZEB2/CEBPE	NoFusion	23.4745	-3.6694	Stranded_total_RNA_PE100bp	Gu et al. Nature Genetics 2019	30643249	EGAS00001003266
SJBALL030466_D1	B-ALL	ZEB2/CEBPE	PAX5-ZCCHC7;CEBPE-IGH	-2.41952	-71.2869	Stranded_total_RNA_PE125bp	this study	this study	EGAS00001004810
SJALL061953_D1	B-ALL	ZEB2/CEBPE	NoFusion	23.9687	-2.39218	Stranded_total_RNA_PE100bp	this study	this study	EGAS00001004810
SJBALL020973_D1	B-ALL	ZEB2/CEBPE	NoFusion	23.1063	-2.3242	Stranded_total_RNA_PE100bp	Gu et al. Nature Genetics 2019	30643249	EGAS00001003266
SJALL050548_D1	B-ALL	ZEB2/CEBPE	CEBPE-IGH	21.7899	-2.53751	Stranded_total_RNA_PE100bp	this study	this study	EGAS00001004810
SJALL049678_D1	B-ALL	ZEB2/CEBPE	IGH-CEBPE	22.5658	-1.72894	Stranded_total_RNA_PE100bp	Gu et al. Nature Genetics 2019	30643249	EGAS00001003266
SJALL054476_D1	B-ALL	Y	NoFusion	46.3835	-4.23672	Stranded_total_RNA_PE100bp	Gu et al. Nature Genetics 2019	30643249	EGAS00001003266
SJBALL020889_D1	B-ALL	Y	NoFusion	47.1296	-3.10343	Unstranded_mRNA_PE100bp	Gu et al. Nature Genetics 2019	30643249	EGAS00001003266
SJALL060150_D1	B-ALL	Y	PAX5-ZCCHC7	45.6457	-2.79987	Stranded_total_RNA_PE100bp	this study	this study	EGAS00001004810
SJALL054518_D1	B-ALL	Y	NoFusion	45.0962	-2.69576	Stranded_total_RNA_PE100bp	this study	this study	EGAS00001004810
SJBALL020169_D1	B-ALL	Y	NoFusion	46.6352	-3.65228	Stranded_total_RNA_PE100bp	Gu et al. Nature Genetics 2019	30643249	EGAS00001003266
SJBALL020165_D1	B-ALL	Y	NoFusion	45.6757	-3.6643	Stranded_total_RNA_PE100bp	Gu et al. Nature Genetics 2019	30643249	EGAS00001003266
SJBALL016287_D1	B-ALL	Y	NoFusion	46.0245	-2.36222	Stranded_total_RNA_PE100bp	Gu et al. Nat Comm 2016	27824051	EGAS00001001952
SJBALL014363_D1	B-ALL	ZNF384	EP300-ZNF384	-75.4456	72.3609	Stranded_total_RNA_PE100bp	Gu et al. Nat Comm 2016	27824051	EGAS00001001952
SJBALL020409_D2	B-ALL	ZNF384	TCF3-ZNF384	-72.947	71.5673	Stranded_total_RNA_PE75bp	NA	NA	phs000218
SJALL040058_D1	B-ALL	ZNF384	TAF15-ZNF384	-77.4307	71.5679	Stranded_total_RNA_PE100bp	Gu et al. Nature Genetics 2019	30643249	EGAS00001003266
SJBALL015150_D1	B-ALL	ZNF384	EP300-ZNF384	-76.1576	75.5422	Stranded_total_RNA_PE100bp	Gu et al. Nature Genetics 2019	30643249	EGAS00001003266
SJBALL046121_D1	B-ALL	ZNF384	EP300-ZNF384;PUM1-MEGF6	-75.4174	73.6098	Stranded_total_RNA_PE100bp	Gu et al. Nature Genetics 2019	30643249	EGAS00001003266
SJBALL021517_D1	B-ALL	ZNF384	TCF3-ZNF384	-68.9816	74.1551	Unstranded_mRNA_PE100bp	Roberts et al. NEJM 2014	25207766	EGAS00001000654
SJBALL020710_D1	B-ALL	ZNF384	EP300-ZNF384	-69.4326	78.4065	Unstranded_mRNA_PE100bp	Gu et al. Nat Comm 2016	27824051	EGAS00001001952
SJBALL021992_D1	B-ALL	ZNF384	CLTC-ZNF384;ZNF384-DDX42	-78.4468	72.6593	Stranded_total_RNA_PE100bp	Gu et al. Nature Genetics 2019	30643249	EGAS00001003266
SJALL044302_D1	B-ALL	ZNF384	TAF15-ZNF384	-72.3878	73.8107	Stranded_total_RNA_PE100bp	this study	this study	EGAS00001004810
SJBALL182_D	B-ALL	ZNF384	TAF15-ZNF384	-76.1474	71.1047	Stranded_total_RNA_PE100bp	Gu et al. Nature Genetics 2019	30643249	EGAS00001003266
SJALL015986_D1	B-ALL	ZNF384	ARID1B-ZNF384	-76.7799	75.3381	Stranded_total_RNA_PE100bp	Gu et al. Nature Genetics 2019	30643249	EGAS00001003266
SJBALL021554_D2	B-ALL	ZNF384	TAF15-ZNF384	-74.0605	79.7196	Stranded_total_RNA_PE75bp	NA	NA	phs000218
SJALL049961_D1	B-ALL	ZNF384	EP300-ZNF384;PICALM-MLLT10	-77.788	76.2522	Stranded_total_RNA_PE100bp	Gu et al. Nature Genetics 2019	30643249	EGAS00001003266
SJBALL015140_D1	B-ALL	ZNF384	TAF15-ZNF384	-72.3206	73.0743	Stranded_total_RNA_PE100bp	Gu et al. Nature Genetics 2019	30643249	EGAS00001003266
SJBALL021995_D1	B-ALL	ZNF384	EWSR1-ZNF384	-77.002	72.4629	Stranded_total_RNA_PE100bp	Gu et al. Nature Genetics 2019	30643249	EGAS00001003266
SJBALL021973_D1	B-ALL	ZNF384	EP300-ZNF384	-77.3295	73.9593	Stranded_total_RNA_PE100bp	Gu et al. Nature Genetics 2019	30643249	EGAS00001003266
SJBALL020476_D2	B-ALL	ZNF384	TCF3-ZNF384	-74.0272	74.4138	Stranded_total_RNA_PE75bp	NA	NA	phs000218
SJBALL015173_D1	B-ALL	ZNF384	EP300-ZNF384	-74.966	74.6033	Stranded_total_RNA_PE100bp	Gu et al. Nature Genetics 2019	30643249	EGAS00001003266
SJBALL021816_D1	B-ALL	ZNF384	ARID1B-ZNF384	-74.663	78.8966	Unstranded_mRNA_PE100bp	Gu et al. Nat Comm 2016	27824051	EGAS00001001952
SJBALL015134_D1	B-ALL	ZNF384	EP300-ZNF384	-71.6151	75.098	Stranded_total_RNA_PE100bp	Gu et al. Nature Genetics 2019	30643249	EGAS00001003266
SJBALL022002_D1	B-ALL	ZNF384	CREBBP-ZNF384	-77.6703	72.886	Stranded_total_RNA_PE100bp	Gu et al. Nature Genetics 2019	30643249	EGAS00001003266
SJALL061701_D1	B-ALL	ZNF384	TCF3-ZNF384	-70.8349	74.8706	Stranded_total_RNA_PE100bp	this study	this study	EGAS00001004810
SJALL060694_D1	B-ALL	ZNF384	EP300-ZNF384	-75.7921	74.4042	Stranded_total_RNA_PE100bp	this study	this study	EGAS00001004810
SJBALL020490_D2	B-ALL	ZNF384	TAF15-ZNF384	-73.9826	71.8833	Stranded_total_RNA_PE75bp	NA	NA	phs000218
SJALL047968_D1	B-ALL	ZNF384	ZNF384-GAS2L1	-71.2481	73.8467	Stranded_total_RNA_PE100bp	this study	this study	EGAS00001004810
SJALL050008_D1	B-ALL	ZNF384	TCF3-ZNF384	-69.6877	75.7543	Stranded_total_RNA_PE100bp	Gu et al. Nature Genetics 2019	30643249	EGAS00001003266
SJBALL020460_D2	B-ALL	ZNF384	EP300-ZNF384	-75.0464	79.9806	Stranded_total_RNA_PE75bp	NA	NA	phs000218
SJBALL021131_D1	B-ALL	ZNF384	EP300-ZNF384	-74.6374	77.3106	Unstranded_mRNA_PE100bp	Gu et al. Nat Comm 2016	27824051	EGAS00001001952
SJBALL021968_D1	B-ALL	ZNF384	EP300-ZNF384	-78.2972	73.8207	Stranded_total_RNA_PE100bp	Gu et al. Nature Genetics 2019	30643249	EGAS00001003266
SJBALL020732_D1	B-ALL	ZNF384	EP300-ZNF384	-69.5318	80.4928	Unstranded_mRNA_PE100bp	Gu et al. Nat Comm 2016	27824051	EGAS00001001952
SJALL049963_D1	B-ALL	ZNF384	EP300-ZNF384	-76.9007	77.5207	Stranded_total_RNA_PE100bp	Gu et al. Nature Genetics 2019	30643249	EGAS00001003266
SJALL040092_D1	B-ALL	ZNF384	EP300-ZNF384	-78.5436	78.5861	Stranded_total_RNA_PE100bp	Gu et al. Nature Genetics 2019	30643249	EGAS00001003266
SJBALL087_D	B-ALL	ZNF384	TCF3-ZNF384	-75.0371	70.6058	Stranded_total_RNA_PE100bp	Gu et al. Nature Genetics 2019	30643249	EGAS00001003266
SJCOGALL010225_D3	B-ALL	ZNF384	EP300-ZNF384	-72.4296	80.8407	Stranded_total_RNA_PE75bp	NA	NA	phs000218
SJBALL020513_D2	B-ALL	ZNF384	TCF3-ZNF384	-68.6953	75.81	Stranded_total_RNA_PE75bp	NA	NA	phs000218
SJBALL030971_D1	B-ALL	ZNF384	TCF3-ZNF384	-73.6	76.5285	Stranded_total_RNA_PE125bp	this study	this study	EGAS00001004810
SJBALL020492_D2	B-ALL	ZNF384	EP300-ZNF384	-73.168	80.0584	Stranded_total_RNA_PE75bp	NA	NA	phs000218
SJALL049957_D1	B-ALL	ZNF384	TCF3-ZNF384	-71.8978	78.3479	Stranded_total_RNA_PE100bp	Gu et al. Nature Genetics 2019	30643249	EGAS00001003266
SJALL015955_D1	B-ALL	ZNF384	EP300-ZNF384	-76.1865	81.8621	Stranded_total_RNA_PE100bp	Gu et al. Nature Genetics 2019	30643249	EGAS00001003266
SJBALL031_R	B-ALL	ZNF384	TCF3-ZNF384	-69.4739	70.3091	Unstranded_mRNA_PE100bp	Waanders et al. Blood Cancer Disc 2020	32793890	EGAS00001003975
SJBALL020606_D1	B-ALL	ZNF384	EP300-ZNF384	-74.3169	81.905	Unstranded_mRNA_PE100bp	Gu et al. Nat Comm 2016	27824051	EGAS00001001952
SJBALL042315_D1	B-ALL	ZNF384	EP300-ZNF384	-70.833	78.0579	Stranded_total_RNA_PE100bp	Gu et al. Nature Genetics 2019	30643249	EGAS00001003266
SJBALL020160_D1	B-ALL	ZNF384	TCF3-ZNF384	-71.6541	77.5282	Stranded_total_RNA_PE100bp	Gu et al. Nature Genetics 2019	30643249	EGAS00001003266
SJBALL015088_D1	B-ALL	ZNF384	EP300-ZNF384;ATRX-COX7B	-78.0013	79.2468	Stranded_total_RNA_PE100bp	Gu et al. Nature Genetics 2019	30643249	EGAS00001003266
SJBALL020587_D1	B-ALL	ZNF384	EP300-ZNF384	-72.3801	82.4266	Unstranded_mRNA_PE100bp	Gu et al. Nat Comm 2016	27824051	EGAS00001001952
SJBALL015174_D1	B-ALL	ZNF384	EP300-ZNF384	-72.5253	79.0054	Stranded_total_RNA_PE100bp	Gu et al. Nature Genetics 2019	30643249	EGAS00001003266
SJALL054527_D1	B-ALL	ZNF384	EP300-ZNF384	-77.2716	81.0035	Stranded_total_RNA_PE100bp	this study	this study	EGAS00001004810
SJALL060140_D1	B-ALL	ZNF384	EP300-ZNF384	-71.1438	79.0466	Stranded_total_RNA_PE100bp	this study	this study	EGAS00001004810
SJBALL020801_D1	B-ALL	ZNF384	TCF3-ZNF384	-71.1798	81.3621	Unstranded_mRNA_PE100bp	Gu et al. Nature Genetics 2019	30643249	EGAS00001003266
SJBALL020869_D1	B-ALL	ZNF384	EP300-ZNF384	-76.7102	80.1585	Unstranded_mRNA_PE100bp	Gu et al. Nature Genetics 2019	30643249	EGAS00001003266
SJBALL020140_D1	B-ALL	ZNF384	EP300-ZNF384	-70.1748	81.3909	Unstranded_mRNA_PE100bp	Gu et al. Nat Comm 2016	27824051	EGAS00001001952
SJALL061958_D1	B-ALL	ZNF384	EP300-ZNF384;WDR74-EEF1A1	-72.0535	75.4297	Stranded_total_RNA_PE100bp	this study	this study	EGAS00001004810
SJALL015961_D1	B-ALL	ZNF384	EWSR1-ZNF384	-75.6257	82.4372	Stranded_total_RNA_PE100bp	Gu et al. Nature Genetics 2019	30643249	EGAS00001003266
SJHYPO146_D	B-ALL	Near haploid	NoFusion	-71.1625	-76.8789	Stranded_total_RNA_PE100bp	Gu et al. Nature Genetics 2019	30643249	EGAS00001003266
SJBALL021644_D1	B-ALL	Near haploid	NoFusion	-61.5497	-84.7487	Stranded_total_RNA_PE100bp	Roberts et al. NEJM 2014	25207766	EGAS00001000654
SJBALL041753_D1	B-ALL	Near haploid	NoFusion	16.1206	8.80294	Stranded_total_RNA_PE100bp	Gu et al. Nature Genetics 2019	30643249	EGAS00001003266
SJBALL041798_D1	B-ALL	Near haploid	NoFusion	-67.4148	-90.4203	Stranded_total_RNA_PE100bp	Gu et al. Nature Genetics 2019	30643249	EGAS00001003266
SJHYPO018_D	B-ALL	Near haploid	NoFusion	-55.8187	-72.2797	Unstranded_mRNA_PE100bp	Roberts et al. NEJM 2014	25207766	EGAS00001000654
SJHYPO072_D	B-ALL	Near haploid	NoFusion	-67.8166	-91.8976	Stranded_total_RNA_PE100bp	Gu et al. Nature Genetics 2019	30643249	EGAS00001003266
SJHYPO123_E	B-ALL	Near haploid	NoFusion	-54.0038	-97.197	Unstranded_mRNA_PE100bp	Roberts et al. NEJM 2014	25207766	EGAS00001000654
SJALL054496_D1	B-ALL	Near haploid	NoFusion	4.7405	-8.65822	Stranded_total_RNA_PE100bp	Gu et al. Nature Genetics 2019	30643249	EGAS00001003266
SJBALL020674_D1	B-ALL	Near haploid	NoFusion	-62.435	-93.5546	Unstranded_mRNA_PE100bp	Gu et al. Nat Comm 2016	27824051	EGAS00001001952
SJBALL021573_D1	B-ALL	Near haploid	NoFusion	21.5363	12.6031	Unstranded_mRNA_PE100bp	Gu et al. Nat Comm 2016	27824051	EGAS00001001952
SJALL015971_D1	B-ALL	Near haploid	NoFusion	-46.3887	-70.7639	Stranded_total_RNA_PE100bp	Gu et al. Nature Genetics 2019	30643249	EGAS00001003266
SJALL016655_D1	B-ALL	Near haploid	NoFusion	-46.3915	-70.7393	Stranded_total_RNA_PE100bp	Gu et al. Nature Genetics 2019	30643249	EGAS00001003266
SJALL048696_D1	B-ALL	Near haploid	NoFusion	1.82639	-9.70007	Stranded_total_RNA_PE100bp	Gu et al. Nature Genetics 2019	30643249	EGAS00001003266
SJBALL046122_D1	B-ALL	Near haploid	NoFusion	-57.4457	-87.8083	Stranded_total_RNA_PE100bp	Gu et al. Nature Genetics 2019	30643249	EGAS00001003266
SJHYPO122_D	B-ALL	Near haploid	NoFusion	-75.1298	-80.4965	Stranded_total_RNA_PE100bp	Gu et al. Nature Genetics 2019	30643249	EGAS00001003266
SJHYPO124_D	B-ALL	Near haploid	NoFusion	-77.7579	-88.2282	Stranded_total_RNA_PE100bp	Gu et al. Nature Genetics 2019	30643249	EGAS00001003266
SJHYPO143_D	B-ALL	Near haploid	NoFusion	-59.8246	-87.836	Stranded_total_RNA_PE100bp	Gu et al. Nature Genetics 2019	30643249	EGAS00001003266
SJBALL016226_D1	B-ALL	Near haploid	NoFusion	-19.1402	-66.3721	Stranded_total_RNA_PE100bp	Gu et al. Nat Comm 2016	27824051	EGAS00001001952
SJBALL016248_D1	B-ALL	Near haploid	NoFusion	-128.334	-44.7424	Stranded_total_RNA_PE100bp	Gu et al. Nat Comm 2016	27824051	EGAS00001001952
SJBALL016284_D1	B-ALL	Near haploid	NoFusion	-60.0718	-86.7765	Stranded_total_RNA_PE100bp	Gu et al. Nat Comm 2016	27824051	EGAS00001001952
SJHYPO020_D	B-ALL	Near haploid	NoFusion	-58.6103	-95.8559	Unstranded_mRNA_PE100bp	Roberts et al. NEJM 2014	25207766	EGAS00001000654
SJALL050831_D1	B-ALL	Near haploid	NoFusion	-64.0419	-87.653	Stranded_total_RNA_PE100bp	Gu et al. Nature Genetics 2019	30643249	EGAS00001003266
SJALL050865_D1	B-ALL	Near haploid	YWHAE-ABR	-59.4375	-88.472	Stranded_total_RNA_PE100bp	Gu et al. Nature Genetics 2019	30643249	EGAS00001003266
SJBALL016260_D1	B-ALL	Near haploid	NoFusion	20.3682	14.1079	Stranded_total_RNA_PE100bp	Gu et al. Nat Comm 2016	27824051	EGAS00001001952
SJBALL041757_D1	B-ALL	Near haploid	NoFusion	-61.8869	-88.4995	Stranded_total_RNA_PE100bp	Gu et al. Nature Genetics 2019	30643249	EGAS00001003266
SJBALL014876_D1	B-ALL	Near haploid	NoFusion	-131.886	-55.8453	Stranded_total_RNA_PE100bp	Gu et al. Nature Genetics 2019	30643249	EGAS00001003266
SJBALL020607_D1	B-ALL	CRLF2(non-Ph-like)	P2RY8-CRLF2	2.4636	-68.6024	Unstranded_mRNA_PE100bp	Gu et al. Nat Comm 2016	27824051	EGAS00001001952
SJALL015942_D1	B-ALL	CRLF2(non-Ph-like)	IGH-CRLF2	-11.3526	-57.2902	Stranded_total_RNA_PE100bp	Gu et al. Nature Genetics 2019	30643249	EGAS00001003266
SJBALL015192_D1	B-ALL	CRLF2(non-Ph-like)	IGH-CRLF2;EED-TMEM126B	-45.0459	-57.8543	Stranded_total_RNA_PE100bp	Gu et al. Nature Genetics 2019	30643249	EGAS00001003266
SJBALL020972_D1	B-ALL	CRLF2(non-Ph-like)	P2RY8-CRLF2	-54.9338	-79.3942	Stranded_total_RNA_PE100bp	Gu et al. Nature Genetics 2019	30643249	EGAS00001003266
SJALL040069_D1	B-ALL	CRLF2(non-Ph-like)	P2RY8-CRLF2	-3.55142	-60.4877	Stranded_total_RNA_PE100bp	Gu et al. Nature Genetics 2019	30643249	EGAS00001003266
SJALL040115_D1	B-ALL	CRLF2(non-Ph-like)	P2RY8-CRLF2	-77.1603	-94.4995	Stranded_total_RNA_PE100bp	Gu et al. Nature Genetics 2019	30643249	EGAS00001003266
SJBALL022485_D1	B-ALL	ETV6-RUNX1-like	NoFusion	-131.928	-42.9919	Unstranded_mRNA_PE100bp	Gu et al. Nature Genetics 2019	30643249	EGAS00001003266
SJHYPO106_D	B-ALL	ETV6-RUNX1-like	ETV6-AMPH	-142.279	-54.1149	Unstranded_mRNA_PE100bp	Gu et al. Nature Genetics 2019	30643249	EGAS00001003266
SJBALL011754_D1	B-ALL	ETV6-RUNX1-like	IKZF1-ZPBP;CD40-XPO5	-138.178	-57.4965	Unstranded_mRNA_PE100bp	Gu et al. Nature Genetics 2019	30643249	EGAS00001003266
SJBALL020675_D1	B-ALL	ETV6-RUNX1-like	STIM2-IKZF1	-123.973	-47.2388	Unstranded_mRNA_PE100bp	Gu et al. Nat Comm 2016	27824051	EGAS00001001952
SJBALL020693_D1	B-ALL	ETV6-RUNX1-like	NoFusion	-123.677	-46.086	Unstranded_mRNA_PE100bp	Gu et al. Nature Genetics 2019	30643249	EGAS00001003266
SJBALL020892_D1	B-ALL	ETV6-RUNX1-like	NoFusion	-123.291	-43.4346	Unstranded_mRNA_PE100bp	Gu et al. Nat Comm 2016	27824051	EGAS00001001952
SJBALL020898_D1	B-ALL	ETV6-RUNX1-like	ETV6-TMTC1	-124.163	-44.4413	Unstranded_mRNA_PE100bp	Gu et al. Nat Comm 2016	27824051	EGAS00001001952
SJALL015975_D1	B-ALL	ETV6-RUNX1-like	IKZF1-ETV6	-129.173	-49.9653	Stranded_total_RNA_PE100bp	Gu et al. Nature Genetics 2019	30643249	EGAS00001003266
SJBALL002241_D1	B-ALL	ETV6-RUNX1-like	TCF3-FLI1	-126.939	-46.0679	Stranded_total_RNA_PE100bp	Gu et al. Nature Genetics 2019	30643249	EGAS00001003266
SJBALL004207_D2	B-ALL	ETV6-RUNX1-like	ETV6-SLC30A7;USP6NL-PEX5	-135.333	-51.0527	Stranded_total_RNA_PE100bp	Gu et al. Nature Genetics 2019	30643249	EGAS00001003266
SJBALL092_D	B-ALL	ETV6-RUNX1-like	TCF3-FLI1	-140.257	-53.0224	Stranded_total_RNA_PE100bp	Gu et al. Nature Genetics 2019	30643249	EGAS00001003266
SJBALL110_D	B-ALL	ETV6-RUNX1-like	FUS-ERG	-126.253	-46.1826	Stranded_total_RNA_PE100bp	Gu et al. Nature Genetics 2019	30643249	EGAS00001003266
SJBALL202_D	B-ALL	ETV6-RUNX1-like	ERC1-ETV6	-138.802	-54.9857	Stranded_total_RNA_PE100bp	Gu et al. Nature Genetics 2019	30643249	EGAS00001003266
SJHYPO115_D	B-ALL	ETV6-RUNX1-like	IKZF1-CLNK	-125.458	-47.014	Stranded_total_RNA_PE100bp	Gu et al. Nature Genetics 2019	30643249	EGAS00001003266
SJBALL036_D	B-ALL	ETV6-RUNX1-like	ETV6-SRRM1	-141.232	-55.8088	Unstranded_mRNA_PE100bp	Gu et al. Nature Genetics 2019	30643249	EGAS00001003266
SJBALL013345_D1	B-ALL	ETV6-RUNX1-like	ETV6-EBF1;IKZF1-RNFT2	-124.081	-48.4776	Unstranded_mRNA_PE100bp	Gu et al. Nat Comm 2016	27824051	EGAS00001001952
SJBALL013385_D1	B-ALL	ETV6-RUNX1-like	CASC15-ETV6	-127.749	-51.3073	Stranded_total_RNA_PE100bp	Gu et al. Nat Comm 2016	27824051	EGAS00001001952
SJBALL016230_D1	B-ALL	ETV6-RUNX1-like	ETV6-QSOX1	-125.442	-44.9801	Stranded_total_RNA_PE100bp	Gu et al. Nat Comm 2016	27824051	EGAS00001001952
SJBALL016242_D1	B-ALL	ETV6-RUNX1-like	ETV6-ELMO1	-132.763	-41.6747	Stranded_total_RNA_PE100bp	Gu et al. Nat Comm 2016	27824051	EGAS00001001952
SJBALL016243_D1	B-ALL	ETV6-RUNX1-like	SENP7-ETV6	-125.785	-47.9288	Stranded_total_RNA_PE100bp	Gu et al. Nat Comm 2016	27824051	EGAS00001001952
SJBALL016279_D1	B-ALL	ETV6-RUNX1-like	NoFusion	-128.063	-49.382	Stranded_total_RNA_PE100bp	Gu et al. Nat Comm 2016	27824051	EGAS00001001952
SJBALL020995_D1	B-ALL	ETV6-RUNX1-like	TCF3-FLI1;PHRF1-DEAF1	-127.352	-54.5662	Unstranded_mRNA_PE100bp	Gu et al. Nat Comm 2016	27824051	EGAS00001001952
SJBALL021197_D2	B-ALL	ETV6-RUNX1-like	ETV6-LHFPL3-AS2	-127.195	-44.5511	Stranded_total_RNA_PE75bp	NA	NA	phs000218
SJBALL021235_D2	B-ALL	ETV6-RUNX1-like	NoFusion	-123.42	-43.6644	Stranded_total_RNA_PE75bp	NA	NA	phs000218
SJCOGALL010919_D3	B-ALL	ETV6-RUNX1-like	ETV6-FAM136A;IKZF1-RNU6-19P	-139.833	-56.3706	Stranded_total_RNA_PE75bp	NA	NA	phs000218
SJBALL247_D	B-ALL	ETV6-RUNX1-like	ETV6-CD163;YWHAG-IKZF1	-140.785	-53.7377	Unstranded_mRNA_PE100bp	Roberts et al. NEJM 2014	25207766	EGAS00001000654
SJALL050863_D1	B-ALL	ETV6-RUNX1-like	ETV6-IKZF1;ETV6-STYK1	-125.293	-48.6511	Stranded_total_RNA_PE100bp	Gu et al. Nature Genetics 2019	30643249	EGAS00001003266
SJBALL044262_D1	B-ALL	ETV6-RUNX1-like	P2RY8-CRLF2	-126.397	-50.0957	Stranded_total_RNA_PE100bp	Gu et al. Nature Genetics 2019	30643249	EGAS00001003266
SJALL040111_D1	B-ALL	ETV6-RUNX1-like	ETV6-ELMO1	-128.345	-45.8818	Stranded_total_RNA_PE100bp	Gu et al. Nature Genetics 2019	30643249	EGAS00001003266
SJALL040137_D1	B-ALL	ETV6-RUNX1-like	IGH-CRLF2	-138.061	-55.3593	Stranded_total_RNA_PE100bp	Gu et al. Nature Genetics 2019	30643249	EGAS00001003266
SJBALL021960_D1	B-ALL	ETV6-RUNX1-like	NoFusion	-138.723	-53.6848	Stranded_total_RNA_PE100bp	Gu et al. Nature Genetics 2019	30643249	EGAS00001003266
SJBALL022035_D1	B-ALL	ETV6-RUNX1-like	NoFusion	-129.427	-51.0724	Stranded_total_RNA_PE100bp	Gu et al. Nature Genetics 2019	30643249	EGAS00001003266
SJBALL014619_D1	B-ALL	Low hyperdiploid	NoFusion	-62.6502	-85.2065	Stranded_total_RNA_PE100bp	Gu et al. Nat Comm 2016	27824051	EGAS00001001952
SJBALL022606_D1	B-ALL	Low hyperdiploid	NoFusion	-64.6617	-94.8624	Unstranded_mRNA_PE100bp	Gu et al. Nature Genetics 2019	30643249	EGAS00001003266
SJALL049999_D1	B-ALL	Low hyperdiploid	NoFusion	-55.1487	-83.4115	Stranded_total_RNA_PE100bp	Gu et al. Nature Genetics 2019	30643249	EGAS00001003266
SJBALL020592_D1	B-ALL	Low hyperdiploid	NoFusion	-62.3224	-94.8373	Unstranded_mRNA_PE100bp	Gu et al. Nature Genetics 2019	30643249	EGAS00001003266
SJALL015970_D1	B-ALL	Low hyperdiploid	NoFusion	-53.8551	-79.8045	Stranded_total_RNA_PE100bp	Gu et al. Nature Genetics 2019	30643249	EGAS00001003266
SJBALL190_D	B-ALL	Low hyperdiploid	NoFusion	-77.8716	-81.3398	Stranded_total_RNA_PE100bp	Gu et al. Nature Genetics 2019	30643249	EGAS00001003266
SJDOWN010_D	B-ALL	Low hyperdiploid	CEBPA-IGH	-54.1425	-79.7329	Stranded_total_RNA_PE100bp	Gu et al. Nature Genetics 2019	30643249	EGAS00001003266
SJBALL016237_D1	B-ALL	Low hyperdiploid	NoFusion	20.0411	13.9643	Stranded_total_RNA_PE100bp	Gu et al. Nat Comm 2016	27824051	EGAS00001001952
SJBALL020106_D1	B-ALL	Low hyperdiploid	B4GALT5-FER1L4	-55.9914	-83.3983	Unstranded_mRNA_PE100bp	Gu et al. Nat Comm 2016	27824051	EGAS00001001952
SJBALL016307_D1	B-ALL	Low hyperdiploid	NoFusion	-55.022	-90.7919	Stranded_total_RNA_PE100bp	Gu et al. Nat Comm 2016	27824051	EGAS00001001952
SJBALL021924_D1	B-ALL	Low hyperdiploid	NoFusion	-84.678	-89.466	Stranded_total_RNA_PE100bp	Gu et al. Nature Genetics 2019	30643249	EGAS00001003266
SJBALL014027_D1	B-ALL	Ph-like	RCSD1-ABL2	-35.8096	-45.1102	Stranded_total_RNA_PE100bp	Gu et al. Nat Comm 2016	27824051	EGAS00001001952
SJBALL014164_D1	B-ALL	Ph-like	SMARCA4-TYK2	-9.39127	-62.9371	Stranded_total_RNA_PE100bp	Gu et al. Nat Comm 2016	27824051	EGAS00001001952
SJBALL014204_D1	B-ALL	Ph-like	HMBOX1-JAK2	-32.5506	-39.2601	Stranded_total_RNA_PE100bp	Gu et al. Nat Comm 2016	27824051	EGAS00001001952
SJBALL014265_D1	B-ALL	Ph-like	SNX29-JAK2	-38.7849	-59.2993	Stranded_total_RNA_PE100bp	Gu et al. Nat Comm 2016	27824051	EGAS00001001952
SJBALL014388_D1	B-ALL	Ph-like	ATF7IP-JAK2	-34.0035	-53.1497	Stranded_total_RNA_PE100bp	Gu et al. Nat Comm 2016	27824051	EGAS00001001952
SJBALL014403_D1	B-ALL	Ph-like	ATF7IP-JAK2	-35.4297	-52.742	Stranded_total_RNA_PE100bp	Gu et al. Nat Comm 2016	27824051	EGAS00001001952
SJBALL014593_D1	B-ALL	Ph-like	EBF1-PDGFRB	-36.4713	-48.9396	Stranded_total_RNA_PE100bp	Gu et al. Nat Comm 2016	27824051	EGAS00001001952
SJBALL014596_D1	B-ALL	Ph-like	EBF1-PDGFRB	-32.3737	-44.5681	Stranded_total_RNA_PE100bp	Gu et al. Nat Comm 2016	27824051	EGAS00001001952
SJBALL014627_D1	B-ALL	Ph-like	PAX5-JAK2;PAX5-ZCCHC7	-41.7551	-57.0204	Stranded_total_RNA_PE100bp	Gu et al. Nat Comm 2016	27824051	EGAS00001001952
SJBALL014648_D1	B-ALL	Ph-like	PAX5-JAK2;IKZF1-SLC25A27	-34.2652	-53.3313	Stranded_total_RNA_PE100bp	Gu et al. Nat Comm 2016	27824051	EGAS00001001952
SJBALL015066_D1	B-ALL	Ph-like	NoFusion	-35.428	-56.1412	Stranded_total_RNA_PE100bp	Gu et al. Nat Comm 2016	27824051	EGAS00001001952
SJBALL015089_D1	B-ALL	Ph-like	ZNF430-TYK2	-33.08	-42.6685	Stranded_total_RNA_PE100bp	Gu et al. Nat Comm 2016	27824051	EGAS00001001952
SJBALL015091_D1	B-ALL	Ph-like	FIP1L1-PDGFRA	-47.741	-41.3665	Stranded_total_RNA_PE100bp	Gu et al. Nat Comm 2016	27824051	EGAS00001001952
SJBALL015092_D1	B-ALL	Ph-like	NoFusion	-36.3427	-55.0948	Stranded_total_RNA_PE100bp	Gu et al. Nat Comm 2016	27824051	EGAS00001001952
SJBALL015093_D1	B-ALL	Ph-like	SSBP2-JAK2;PAX5-ZCCHC7	-31.6668	-58.9388	Stranded_total_RNA_PE100bp	Gu et al. Nat Comm 2016	27824051	EGAS00001001952
SJBALL015099_D1	B-ALL	Ph-like	SFPQ-ABL1;XBP1-FOXJ2	-44.0132	-46.859	Stranded_total_RNA_PE100bp	Gu et al. Nat Comm 2016	27824051	EGAS00001001952
SJBALL015103_D1	B-ALL	Ph-like	EPOR-IGH	-32.2064	-42.4935	Stranded_total_RNA_PE100bp	Gu et al. Nat Comm 2016	27824051	EGAS00001001952
SJBALL015115_D1	B-ALL	Ph-like	IGH-EPOR	-32.0681	-41.2486	Stranded_total_RNA_PE100bp	Gu et al. Nat Comm 2016	27824051	EGAS00001001952
SJBALL015117_D1	B-ALL	Ph-like	MEF2D-CSF1R	-39.2543	-46.3215	Stranded_total_RNA_PE100bp	Gu et al. Nat Comm 2016	27824051	EGAS00001001952
SJBALL015152_D1	B-ALL	Ph-like	SSBP2-JAK2	-24.0089	-71.1947	Stranded_total_RNA_PE100bp	Gu et al. Nature Genetics 2019	30643249	EGAS00001003266
SJBALL015176_D1	B-ALL	Ph-like	EPOR-IGH	-39.3933	-61.1284	Stranded_total_RNA_PE100bp	Gu et al. Nat Comm 2016	27824051	EGAS00001001952
SJBALL015190_D1	B-ALL	Ph-like	PAX5-JAK2;PAX5-ZCCHC7	-37.3514	-48.5126	Stranded_total_RNA_PE100bp	Gu et al. Nat Comm 2016	27824051	EGAS00001001952
SJBALL042202_D1	B-ALL	Ph-like	EPOR-IGH	-33.6393	-63.3737	Stranded_total_RNA_PE100bp	Gu et al. Nat Comm 2016	27824051	EGAS00001001952
SJBALL042211_D1	B-ALL	Ph-like	ETV6-ABL1	-24.7811	-62.8682	Stranded_total_RNA_PE100bp	Gu et al. Nat Comm 2016	27824051	EGAS00001001952
SJBALL002384_D1	B-ALL	Ph-like	EBF1-PDGFRB;PAX5-ZCCHC7	-36.3516	-69.6072	Unstranded_mRNA_PE75bp	Gu et al. Nature Genetics 2019	30643249	EGAS00001003266
SJBALL021367_D2	B-ALL	Ph-like	BCR-JAK2	-36.3855	-70.1176	Unstranded_mRNA_PE75bp	Gu et al. Nature Genetics 2019	30643249	EGAS00001003266
SJBALL021800_D1	B-ALL	Ph-like	ETV6-JAK2	-32.3842	-49.5562	Unstranded_mRNA_PE100bp	Roberts et al. NEJM 2014	25207766	EGAS00001000654
SJBALL021807_D1	B-ALL	Ph-like	NoFusion	-41.643	-61.7861	Unstranded_mRNA_PE100bp	Roberts et al. NEJM 2014	25207766	EGAS00001000654
SJBALL041742_D1	B-ALL	Ph-like	NoFusion	-32.8868	-60.7678	Stranded_total_RNA_PE100bp	Gu et al. Nature Genetics 2019	30643249	EGAS00001003266
SJBALL041759_D1	B-ALL	Ph-like	NoFusion	-36.7061	-54.2276	Stranded_total_RNA_PE100bp	Gu et al. Nature Genetics 2019	30643249	EGAS00001003266
SJBALL041762_D1	B-ALL	Ph-like	PAX5-ZCCHC7	-37.9984	-56.4604	Stranded_total_RNA_PE100bp	Gu et al. Nature Genetics 2019	30643249	EGAS00001003266
SJCOGALL010900_D2	B-ALL	Ph-like	NoFusion	-37.316	-59.2745	Stranded_total_RNA_PE75bp	NA	NA	phs000218
SJALL049960_D1	B-ALL	Ph-like	IGH-CRLF2;USP9X-DDX3X	-26.3539	-63.3177	Stranded_total_RNA_PE100bp	Gu et al. Nature Genetics 2019	30643249	EGAS00001003266
SJALL049971_D1	B-ALL	Ph-like	P2RY8-CRLF2	-44.1973	-54.5306	Stranded_total_RNA_PE100bp	Gu et al. Nature Genetics 2019	30643249	EGAS00001003266
SJALL049991_D1	B-ALL	Ph-like	P2RY8-CRLF2	-32.4572	-56.3138	Stranded_total_RNA_PE100bp	Gu et al. Nature Genetics 2019	30643249	EGAS00001003266
SJALL050003_D1	B-ALL	Ph-like	IGH-CRLF2;ZCCHC7-EXOSC3	-42.7841	-55.9358	Stranded_total_RNA_PE100bp	Gu et al. Nature Genetics 2019	30643249	EGAS00001003266
SJALL050015_D1	B-ALL	Ph-like	PCM1-JAK2	-43.9391	-62.6643	Stranded_total_RNA_PE100bp	Gu et al. Nature Genetics 2019	30643249	EGAS00001003266
SJALL050019_D1	B-ALL	Ph-like	PAX5-JAK2	-43.02	-57.6898	Stranded_total_RNA_PE100bp	Gu et al. Nature Genetics 2019	30643249	EGAS00001003266
SJALL054469_D1	B-ALL	Ph-like	IGH-CRLF2	-45.1861	-56.3652	Stranded_total_RNA_PE100bp	Gu et al. Nature Genetics 2019	30643249	EGAS00001003266
SJALL015978_D1	B-ALL	Ph-like	IGH-CRLF2	-39.4491	-53.7426	Stranded_total_RNA_PE100bp	Gu et al. Nature Genetics 2019	30643249	EGAS00001003266
SJALL048673_D1	B-ALL	Ph-like	IGH-CRLF2	-29.2087	-52.2837	Stranded_total_RNA_PE100bp	Gu et al. Nature Genetics 2019	30643249	EGAS00001003266
SJALL048689_D1	B-ALL	Ph-like	IGH-CRLF2	-38.4671	-65.5683	Stranded_total_RNA_PE100bp	Gu et al. Nature Genetics 2019	30643249	EGAS00001003266
SJBALL004068_D2	B-ALL	Ph-like	EBF1-PDGFRB	-30.6525	-56.186	Stranded_total_RNA_PE100bp	Gu et al. Nature Genetics 2019	30643249	EGAS00001003266
SJBALL004114_D2	B-ALL	Ph-like	CRLF2-IGH(P2RY8-IGH)	-37.8382	-57.053	Stranded_total_RNA_PE100bp	Gu et al. Nature Genetics 2019	30643249	EGAS00001003266
SJBALL012_D	B-ALL	Ph-like	EBF1-PDGFRB	-30.4146	-55.1315	Stranded_total_RNA_PE100bp	Gu et al. Nature Genetics 2019	30643249	EGAS00001003266
SJBALL013851_D1	B-ALL	Ph-like	IGH-CRLF2;SMARCC1-PRSS50;CNTRL-DENND1A	-39.2208	-57.0441	Stranded_total_RNA_PE100bp	Gu et al. Nature Genetics 2019	30643249	EGAS00001003266
SJBALL013916_D1	B-ALL	Ph-like	IGH-CRLF2	-42.9238	-63.5336	Stranded_total_RNA_PE100bp	Gu et al. Nature Genetics 2019	30643249	EGAS00001003266
SJBALL015070_D1	B-ALL	Ph-like	IGH-CRLF2	-36.8355	-57.2511	Stranded_total_RNA_PE100bp	Gu et al. Nature Genetics 2019	30643249	EGAS00001003266
SJBALL015087_D1	B-ALL	Ph-like	P2RY8-CRLF2	-33.3145	-43.1151	Stranded_total_RNA_PE100bp	Gu et al. Nature Genetics 2019	30643249	EGAS00001003266
SJBALL015184_D1	B-ALL	Ph-like	IGH-CRLF2;USP9X-DDX3X	-40.3537	-59.3763	Stranded_total_RNA_PE100bp	Gu et al. Nature Genetics 2019	30643249	EGAS00001003266
SJBALL020157_D1	B-ALL	Ph-like	NoFusion	-39.6579	-54.8101	Stranded_total_RNA_PE100bp	Gu et al. Nature Genetics 2019	30643249	EGAS00001003266
SJBALL020159_D1	B-ALL	Ph-like	P2RY8-CRLF2	-33.9069	-61.9678	Stranded_total_RNA_PE100bp	Gu et al. Nature Genetics 2019	30643249	EGAS00001003266
SJBALL020161_D1	B-ALL	Ph-like	IGH-CRLF2	-32.0477	-62.5582	Stranded_total_RNA_PE100bp	Gu et al. Nature Genetics 2019	30643249	EGAS00001003266
SJBALL020174_D1	B-ALL	Ph-like	IGH-CRLF2	-42.0574	-56.2584	Stranded_total_RNA_PE100bp	Gu et al. Nature Genetics 2019	30643249	EGAS00001003266
SJBALL021275_D1	B-ALL	Ph-like	EPOR-IGH	-40.183	-56.2425	Stranded_total_RNA_PE100bp	Gu et al. Nature Genetics 2019	30643249	EGAS00001003266
SJBALL042275_D1	B-ALL	Ph-like	SNX29-PDGFRB	-28.8295	-67.7376	Stranded_total_RNA_PE100bp	Gu et al. Nature Genetics 2019	30643249	EGAS00001003266
SJBALL043671_D1	B-ALL	Ph-like	EPOR-IGH	-37.2259	-47.1867	Stranded_total_RNA_PE100bp	Gu et al. Nature Genetics 2019	30643249	EGAS00001003266
SJBALL043673_D1	B-ALL	Ph-like	IGH-CRLF2;PAX5-ZCCHC7	-33.6441	-57.8942	Stranded_total_RNA_PE100bp	Gu et al. Nature Genetics 2019	30643249	EGAS00001003266
SJBALL043688_D1	B-ALL	Ph-like	IGH-EPOR	-38.3917	-54.9237	Stranded_total_RNA_PE100bp	Gu et al. Nature Genetics 2019	30643249	EGAS00001003266
SJBALL044896_D1	B-ALL	Ph-like	NoFusion	-11.277	-62.8457	Stranded_total_RNA_PE100bp	Gu et al. Nature Genetics 2019	30643249	EGAS00001003266
SJBALL046120_D1	B-ALL	Ph-like	IGH-CRLF2	-35.6249	-59.7965	Stranded_total_RNA_PE100bp	Gu et al. Nature Genetics 2019	30643249	EGAS00001003266
SJBALL047026_D1	B-ALL	Ph-like	IGH-CRLF2	-40.3994	-58.8994	Stranded_total_RNA_PE100bp	Gu et al. Nature Genetics 2019	30643249	EGAS00001003266
SJBALL047364_D1	B-ALL	Ph-like	IGH-CRLF2	-38.809	-65.1755	Stranded_total_RNA_PE100bp	Gu et al. Nature Genetics 2019	30643249	EGAS00001003266
SJBALL048069_D1	B-ALL	Ph-like	IGH-CRLF2	-43.1142	-53.9682	Stranded_total_RNA_PE100bp	Gu et al. Nature Genetics 2019	30643249	EGAS00001003266
SJBALL013334_D1	B-ALL	Ph-like	SSBP2-JAK2	-37.3352	-60.6019	Unstranded_mRNA_PE100bp	Gu et al. Nat Comm 2016	27824051	EGAS00001001952
SJBALL013339_D1	B-ALL	Ph-like	GATAD2A-LYN	-31.7718	-51.1052	Unstranded_mRNA_PE100bp	Gu et al. Nat Comm 2016	27824051	EGAS00001001952
SJBALL013350_D1	B-ALL	Ph-like	IGH-EPOR;PAX5-GRM3	-40.1522	-44.7233	Unstranded_mRNA_PE100bp	Gu et al. Nat Comm 2016	27824051	EGAS00001001952
SJBALL013352_D1	B-ALL	Ph-like	LSM14A-ABL1	-33.2696	-45.4777	Unstranded_mRNA_PE100bp	Gu et al. Nat Comm 2016	27824051	EGAS00001001952
SJBALL013354_D1	B-ALL	Ph-like	EPOR-IGH	-42.5069	-58.287	Unstranded_mRNA_PE100bp	Gu et al. Nat Comm 2016	27824051	EGAS00001001952
SJBALL013358_D1	B-ALL	Ph-like	IGH-EPOR	-38.4112	-50.2148	Unstranded_mRNA_PE100bp	Gu et al. Nat Comm 2016	27824051	EGAS00001001952
SJBALL013367_D1	B-ALL	Ph-like	NoFusion	1.66514	-8.4981	Unstranded_mRNA_PE100bp	Gu et al. Nat Comm 2016	27824051	EGAS00001001952
SJBALL013368_D1	B-ALL	Ph-like	SSBP2-CSF1R	-32.762	-50.5713	Unstranded_mRNA_PE100bp	Gu et al. Nat Comm 2016	27824051	EGAS00001001952
SJBALL013375_D1	B-ALL	Ph-like	NoFusion	-43.0649	-46.0755	Unstranded_mRNA_PE100bp	Gu et al. Nat Comm 2016	27824051	EGAS00001001952
SJBALL013384_D1	B-ALL	Ph-like	EPOR-IGH	-41.6846	-52.6984	Unstranded_mRNA_PE100bp	Gu et al. Nat Comm 2016	27824051	EGAS00001001952
SJBALL013386_D1	B-ALL	Ph-like	ZNF274-JAK2	-41.096	-49.2237	Unstranded_mRNA_PE100bp	Gu et al. Nat Comm 2016	27824051	EGAS00001001952
SJBALL016258_D1	B-ALL	Ph-like	BCR-JAK2	-33.7493	-41.3201	Stranded_total_RNA_PE100bp	Gu et al. Nat Comm 2016	27824051	EGAS00001001952
SJCOGALL010866_D2	B-ALL	Ph-like	IGH-CRLF2	-27.8037	-50.4389	Stranded_total_RNA_PE75bp	NA	NA	phs000218
SJCOGALL010876_D3	B-ALL	Ph-like	NoFusion	-40.9926	-54.9595	Stranded_total_RNA_PE75bp	Gu et al. Nat Comm 2016	27824051	EGAS00001001952
SJBALL020084_D1	B-ALL	Ph-like	IGK-EPOR	-43.1996	-44.6949	Unstranded_mRNA_PE100bp	Roberts et al. NEJM 2014	25207766	EGAS00001000654
SJBALL020145_D1	B-ALL	Ph-like	IGH-CRLF2	-42.5214	-60.3779	Unstranded_mRNA_PE100bp	Roberts et al. NEJM 2014	25207766	EGAS00001000654
SJBALL020579_D1	B-ALL	Ph-like	ZEB2-PDGFRB	-33.4405	-49.8669	Unstranded_mRNA_PE100bp	Roberts et al. NEJM 2014	25207766	EGAS00001000654
SJBALL020589_D1	B-ALL	Ph-like	ATF7IP-JAK2;PAX5-ZCCHC7	-35.1648	-45.1872	Unstranded_mRNA_PE100bp	Roberts et al. NEJM 2014	25207766	EGAS00001000654
SJBALL020625_D1	B-ALL	Ph-like	ZC3HAV1-ABL2;KDM6A-XIST	-39.8557	-48.2158	Unstranded_mRNA_PE100bp	Roberts et al. NEJM 2014	25207766	EGAS00001000654
SJBALL020649_D1	B-ALL	Ph-like	EPOR-IGH	-42.6648	-49.0507	Unstranded_mRNA_PE100bp	Roberts et al. NEJM 2014	25207766	EGAS00001000654
SJBALL020681_D1	B-ALL	Ph-like	TERF2-JAK2	-41.1838	-62.8161	Unstranded_mRNA_PE100bp	Roberts et al. NEJM 2014	25207766	EGAS00001000654
SJBALL020824_D1	B-ALL	Ph-like	EPOR-IGH	-41.3468	-45.9266	Unstranded_mRNA_PE100bp	Roberts et al. NEJM 2014	25207766	EGAS00001000654
SJBALL020882_D1	B-ALL	Ph-like	NUP214-ABL1	-37.8098	-42.8418	Unstranded_mRNA_PE100bp	Roberts et al. NEJM 2014	25207766	EGAS00001000654
SJBALL020936_D1	B-ALL	Ph-like	PAX5-JAK2	-41.715	-51.6352	Unstranded_mRNA_PE100bp	Roberts et al. NEJM 2014	25207766	EGAS00001000654
SJBALL021053_D1	B-ALL	Ph-like	IGH-CRLF2	-28.8746	-72.3347	Unstranded_mRNA_PE100bp	Roberts et al. NEJM 2014	25207766	EGAS00001000654
SJBALL021100_D1	B-ALL	Ph-like	IGH-CRLF2	-41.1159	-54.5482	Unstranded_mRNA_PE100bp	Roberts et al. NEJM 2014	25207766	EGAS00001000654
SJBALL021118_D1	B-ALL	Ph-like	IGH-CRLF2	-29.5585	-72.5023	Unstranded_mRNA_PE100bp	Roberts et al. NEJM 2014	25207766	EGAS00001000654
SJBALL021329_D1	B-ALL	Ph-like	PAX5-JAK2	-41.0038	-47.428	Unstranded_mRNA_PE100bp	Roberts et al. NEJM 2014	25207766	EGAS00001000654
SJBALL021728_D1	B-ALL	Ph-like	ETV6-ABL1	-23.2296	-56.3351	Unstranded_mRNA_PE100bp	Roberts et al. NEJM 2014	25207766	EGAS00001000654
SJBALL021780_D1	B-ALL	Ph-like	BCR-JAK2	-26.6573	-68.0166	Unstranded_mRNA_PE100bp	Roberts et al. NEJM 2014	25207766	EGAS00001000654
SJBALL021814_D1	B-ALL	Ph-like	TPR-JAK2	-31.6867	-50.1405	Unstranded_mRNA_PE100bp	Roberts et al. NEJM 2014	25207766	EGAS00001000654
SJBALL021866_D1	B-ALL	Ph-like	PPFIBP1-JAK2	-41.632	-61.815	Unstranded_mRNA_PE100bp	Roberts et al. NEJM 2014	25207766	EGAS00001000654
SJBALL022245_D1	B-ALL	Ph-like	ZC3HAV1-ABL2	-40.1869	-47.3889	Unstranded_mRNA_PE100bp	Roberts et al. NEJM 2014	25207766	EGAS00001000654
SJBALL022489_D1	B-ALL	Ph-like	RCSD1-ABL2	-42.0948	-47.5824	Unstranded_mRNA_PE100bp	Roberts et al. NEJM 2014	25207766	EGAS00001000654
SJBALL204_D	B-ALL	Ph-like	SSBP2-CSF1R	-35.827	-48.979	Unstranded_mRNA_PE100bp	Roberts et al. NEJM 2014	25207766	EGAS00001000654
SJBALL255_D	B-ALL	Ph-like	PAN3-ZCCHC7	-18.1579	-66.9057	Unstranded_mRNA_PE100bp	Roberts et al. NEJM 2014	25207766	EGAS00001000654
SJBALL262_D	B-ALL	Ph-like	RCSD1-ABL2	-40.481	-46.0965	Unstranded_mRNA_PE100bp	Roberts et al. NEJM 2014	25207766	EGAS00001000654
SJBALL265_D	B-ALL	Ph-like	PAX5-JAK2	-30.5404	-67.8195	Unstranded_mRNA_PE100bp	Roberts et al. NEJM 2014	25207766	EGAS00001000654
SJBALL266_D	B-ALL	Ph-like	ETV6-ABL1	-19.9103	-53.9677	Unstranded_mRNA_PE100bp	Roberts et al. NEJM 2014	25207766	EGAS00001000654
SJBALL268_D	B-ALL	Ph-like	ZEB2-PDGFRB;PAX5-BZW1	-27.5936	-70.4467	Unstranded_mRNA_PE100bp	Roberts et al. NEJM 2014	25207766	EGAS00001000654
SJDOWN013_D	B-ALL	Ph-like	P2RY8-CRLF2	-58.8617	-67.9818	Unstranded_mRNA_PE100bp	Roberts et al. NEJM 2014	25207766	EGAS00001000654
SJBALL043637_D1	B-ALL	Ph-like	EBF1-PDGFRB	-32.2543	-53.3789	Stranded_total_RNA_PE100bp	Gu et al. Nature Genetics 2019	30643249	EGAS00001003266
SJBALL043641_D1	B-ALL	Ph-like	NoFusion	-62.9873	-69.2284	Stranded_total_RNA_PE100bp	Gu et al. Nature Genetics 2019	30643249	EGAS00001003266
SJBALL043642_D1	B-ALL	Ph-like	EBF1-PDGFRB	-29.4489	-54.713	Stranded_total_RNA_PE100bp	Gu et al. Nature Genetics 2019	30643249	EGAS00001003266
SJBALL044266_D1	B-ALL	Ph-like	IGH-CRLF2	-12.0732	-61.437	Stranded_total_RNA_PE100bp	Gu et al. Nature Genetics 2019	30643249	EGAS00001003266
SJBALL044267_D1	B-ALL	Ph-like	EPOR-IGH	-36.8755	-61.1435	Stranded_total_RNA_PE100bp	Gu et al. Nature Genetics 2019	30643249	EGAS00001003266
SJBALL044268_D1	B-ALL	Ph-like	EPOR-IGH;USP9X-DDX3X	-36.5832	-56.0194	Stranded_total_RNA_PE100bp	Gu et al. Nature Genetics 2019	30643249	EGAS00001003266
SJBALL044274_D1	B-ALL	Ph-like	EPOR-IGH	-35.2767	-56.6775	Stranded_total_RNA_PE100bp	Gu et al. Nature Genetics 2019	30643249	EGAS00001003266
SJBALL042284_D1	B-ALL	B-other	NoFusion	11.9506	-12.8612	Stranded_total_RNA_PE100bp	Gu et al. Nature Genetics 2019	30643249	EGAS00001003266
SJBALL021061_D1	B-ALL	B-other	NoFusion	24.6412	13.844	Unstranded_mRNA_PE100bp	Gu et al. Nat Comm 2016	27824051	EGAS00001001952
SJBALL022051_D1	B-ALL	B-other	NoFusion	45.4148	-6.69472	Stranded_total_RNA_PE100bp	Gu et al. Nature Genetics 2019	30643249	EGAS00001003266
SJBALL020831_D1	B-ALL	B-other	XPO1-TNRC18	41.5705	-10.4939	Unstranded_mRNA_PE100bp	Gu et al. Nat Comm 2016	27824051	EGAS00001001952
SJBALL015081_D1	B-ALL	B-other	NoFusion	-76.5615	-76.4115	Stranded_total_RNA_PE100bp	Gu et al. Nat Comm 2016	27824051	EGAS00001001952
SJBALL014149_D1	B-ALL	B-other	NoFusion	13.8939	21.7968	Stranded_total_RNA_PE100bp	Gu et al. Nat Comm 2016	27824051	EGAS00001001952
SJBALL014603_D1	B-ALL	B-other	NoFusion	9.05061	-12.4916	Stranded_total_RNA_PE100bp	Gu et al. Nat Comm 2016	27824051	EGAS00001001952
SJBALL014653_D1	B-ALL	B-other	ZMYM2-FLT3	11.5639	3.47556	Stranded_total_RNA_PE100bp	Gu et al. Nat Comm 2016	27824051	EGAS00001001952
SJBALL015154_D1	B-ALL	B-other	ZEB2-IGH	4.76779	-26.43	Stranded_total_RNA_PE100bp	Gu et al. Nat Comm 2016	27824051	EGAS00001001952
SJBALL015194_D1	B-ALL	B-other	CPED1-SND1	31.9297	3.75817	Stranded_total_RNA_PE100bp	Gu et al. Nature Genetics 2019	30643249	EGAS00001003266
SJALL054495_D1	B-ALL	B-other	PAX5-CBFA2T3	11.7398	3.86011	Stranded_total_RNA_PE100bp	Gu et al. Nature Genetics 2019	30643249	EGAS00001003266
SJALL054502_D1	B-ALL	B-other	NoFusion	21.9065	15.6485	Stranded_total_RNA_PE100bp	Gu et al. Nature Genetics 2019	30643249	EGAS00001003266
SJBALL020584_D1	B-ALL	B-other	NoFusion	38.405	-17.492	Unstranded_mRNA_PE100bp	Gu et al. Nat Comm 2016	27824051	EGAS00001001952
SJBALL020795_D1	B-ALL	B-other	NoFusion	13.0132	-51.8893	Unstranded_mRNA_PE100bp	Gu et al. Nat Comm 2016	27824051	EGAS00001001952
SJBALL020885_D1	B-ALL	B-other	NoFusion	24.8398	7.83191	Unstranded_mRNA_PE100bp	Gu et al. Nat Comm 2016	27824051	EGAS00001001952
SJALL015963_D1	B-ALL	B-other	NoFusion	-9.3668	-4.90971	Stranded_total_RNA_PE100bp	Gu et al. Nature Genetics 2019	30643249	EGAS00001003266
SJBALL015123_D1	B-ALL	B-other	NoFusion	10.1048	-21.9631	Stranded_total_RNA_PE100bp	Gu et al. Nature Genetics 2019	30643249	EGAS00001003266
SJBALL015193_D1	B-ALL	B-other	NoFusion	-45.7367	-56.445	Stranded_total_RNA_PE100bp	Gu et al. Nature Genetics 2019	30643249	EGAS00001003266
SJBALL042265_D1	B-ALL	B-other	NoFusion	17.8341	-16.8922	Stranded_total_RNA_PE100bp	Gu et al. Nature Genetics 2019	30643249	EGAS00001003266
SJBALL042266_D1	B-ALL	B-other	NoFusion	-0.113736	-73.0424	Stranded_total_RNA_PE100bp	Gu et al. Nature Genetics 2019	30643249	EGAS00001003266
SJBALL043677_D1	B-ALL	B-other	NoFusion	16.9269	-16.0815	Stranded_total_RNA_PE100bp	Gu et al. Nature Genetics 2019	30643249	EGAS00001003266
SJBALL044883_D1	B-ALL	B-other	NoFusion	27.6564	7.42959	Stranded_total_RNA_PE100bp	Gu et al. Nature Genetics 2019	30643249	EGAS00001003266
SJBALL044894_D1	B-ALL	B-other	NoFusion	5.91866	-10.9086	Stranded_total_RNA_PE100bp	Gu et al. Nature Genetics 2019	30643249	EGAS00001003266
SJBALL194_D	B-ALL	B-other	NoFusion	-78.1621	-94.7867	Stranded_total_RNA_PE100bp	Gu et al. Nature Genetics 2019	30643249	EGAS00001003266
SJBALL013328_D1	B-ALL	B-other	NoFusion	18.5372	17.5825	Unstranded_mRNA_PE100bp	Gu et al. Nat Comm 2016	27824051	EGAS00001001952
SJBALL013357_D1	B-ALL	B-other	NoFusion	20.4064	16.4342	Stranded_total_RNA_PE100bp	Gu et al. Nat Comm 2016	27824051	EGAS00001001952
SJBALL016219_D1	B-ALL	B-other	NoFusion	21.2536	14.5468	Stranded_total_RNA_PE100bp	Gu et al. Nat Comm 2016	27824051	EGAS00001001952
SJBALL016233_D1	B-ALL	B-other	NoFusion	24.2935	14.8898	Stranded_total_RNA_PE100bp	Gu et al. Nat Comm 2016	27824051	EGAS00001001952
SJBALL016266_D1	B-ALL	B-other	NoFusion	21.1741	15.5156	Stranded_total_RNA_PE100bp	Gu et al. Nat Comm 2016	27824051	EGAS00001001952
SJBALL016296_D1	B-ALL	B-other	NoFusion	22.967	15.3846	Stranded_total_RNA_PE100bp	Gu et al. Nat Comm 2016	27824051	EGAS00001001952
SJBALL021012_D1	B-ALL	B-other	NoFusion	41.4842	-11.0236	Unstranded_mRNA_PE100bp	Gu et al. Nat Comm 2016	27824051	EGAS00001001952
SJCOGALL011124_D2	B-ALL	B-other	NoFusion	-11.5039	-63.5621	Stranded_total_RNA_PE75bp	NA	NA	phs000218
SJBALL011_D	B-ALL	B-other	NoFusion	-9.36279	-4.89956	Unstranded_mRNA_PE100bp	Roberts et al. NEJM 2014	25207766	EGAS00001000654
SJALL050870_D1	B-ALL	B-other	NoFusion	2.26591	-56.258	Stranded_total_RNA_PE100bp	Gu et al. Nature Genetics 2019	30643249	EGAS00001003266
SJBALL043650_D1	B-ALL	B-other	NoFusion	-38.5811	-53.0648	Stranded_total_RNA_PE100bp	Gu et al. Nature Genetics 2019	30643249	EGAS00001003266
SJMLL001_D	T-ALL	NA	KMT2A-MLLT3;DEXI-TASP1	24.0625	67.5317	Stranded_total_RNA_PE100bp	this study	this study	EGAS00001004810
SJMLL014_D	T-ALL	NA	KMT2A-MLLT3;DEXI-TASP1	3.15026	40.0423	Stranded_total_RNA_PE100bp	this study	this study	EGAS00001004810
SJMLL030007_D1	T-ALL	NA	DEXI-TASP1(KMT2A fusion missing)	5.20729	41.0667	Stranded_total_RNA_PE100bp	this study	this study	EGAS00001004810
SJMLL002_D	T-ALL	NA	KMT2A-MLLT1;DEXI-TASP1	74.7929	56.4837	Stranded_total_RNA_PE100bp	this study	this study	EGAS00001004810
SJTALL077_D	T-ALL	notETP	NoFusion(STIL-TAL1 from CPML sample)	98.8216	45.3216	Stranded_total_RNA_PE100bp	this study	this study	EGAS00001004810
SJTALL030_D	T-ALL	notETP	NoFusion	84.5158	69.5793	Stranded_total_RNA_PE100bp	this study	this study	EGAS00001004810
SJMLL019_D	T-ALL	NA	KMT2A-MLLT3;DEXI-TASP1	-5.32418	28.7756	Stranded_total_RNA_PE100bp	this study	this study	EGAS00001004810
SJTALL030551_D1	T-ALL	NA	STIL-TAL1	83.4598	38.6593	Stranded_total_RNA_PE125bp	this study	this study	EGAS00001004810
SJTALL030064_D1	T-ALL	NA	STIL-TAL1	92.2825	45.9186	Stranded_total_RNA_PE125bp	this study	this study	EGAS00001004810
SJTALL030071_D1	T-ALL	NA	NoFusion	64.1048	82.2309	Stranded_total_RNA_PE125bp	this study	this study	EGAS00001004810
SJTALL030125_D1	T-ALL	NA	NoFusion	72.0133	69.6199	Stranded_total_RNA_PE125bp	this study	this study	EGAS00001004810
SJTALL030124_D1	T-ALL	NA	NoFusion	79.9395	42.9341	Stranded_total_RNA_PE125bp	this study	this study	EGAS00001004810
SJTALL030134_D1	T-ALL	NA	LMO2-TRA	80.6904	43.2936	Stranded_total_RNA_PE125bp	this study	this study	EGAS00001004810
SJTALL030175_D1	T-ALL	NA	SYNRG-TTBK2	59.6159	79.4791	Stranded_total_RNA_PE125bp	this study	this study	EGAS00001004810
SJTALL030189_D1	T-ALL	NA	PDCD6IP-TASP1;DEXI-TASP1	74.3359	48.8466	Stranded_total_RNA_PE125bp	this study	this study	EGAS00001004810
SJTALL030212_D1	T-ALL	NA	KMT2A-MLLT10;DEXI-TASP1;PDCD6IP-TASP1	71.9336	50.0188	Stranded_total_RNA_PE125bp	this study	this study	EGAS00001004810
SJTALL030213_D1	T-ALL	NA	NoFusion	100.746	50.3582	Stranded_total_RNA_PE125bp	this study	this study	EGAS00001004810
SJTALL030263_D1	T-ALL	NA	TCF7-SPI1;WRN-TEX15	69.4943	5.16079	Stranded_total_RNA_PE125bp	this study	this study	EGAS00001004810
SJTALL030249_D1	T-ALL	NA	SFPQ-ZFP36L2	18.8467	25.0807	Stranded_total_RNA_PE125bp	this study	this study	EGAS00001004810
SJTALL030338_D1	T-ALL	NA	KMT2A-AFDN;PDCD6IP-TASP1	75.0468	49.0239	Stranded_total_RNA_PE125bp	this study	this study	EGAS00001004810
SJTALL030373_D1	T-ALL	NA	STIL-TAL1	80.5677	40.0215	Stranded_total_RNA_PE125bp	NA	NA	NA
SJTALL030376_D1	T-ALL	ETP	NoFusion	22.9729	17.6796	Stranded_total_RNA_PE125bp	this study	this study	EGAS00001004810
SJTALL030390_D1	T-ALL	NA	KMT2A-AFDN;TASP1-PDCD6IP;DEXI-TASP1	73.2864	49.524	Stranded_total_RNA_PE125bp	this study	this study	EGAS00001004810
SJTALL030442_D1	T-ALL	NA	NoFusion	95.467	60.7578	Stranded_total_RNA_PE125bp	this study	this study	EGAS00001004810
SJTALL030493_D1	T-ALL	NA	NoFusion	59.8618	78.4531	Stranded_total_RNA_PE125bp	this study	this study	EGAS00001004810
SJTALL030494_D1	T-ALL	NA	NoFusion	77.0067	39.6913	Stranded_total_RNA_PE125bp	this study	this study	EGAS00001004810
SJTALL030522_D1	T-ALL	NA	NoFusion	77.3186	40.3174	Stranded_total_RNA_PE125bp	this study	this study	EGAS00001004810
SJTALL030527_D1	T-ALL	NA	NoFusion	80.1282	68.9118	Stranded_total_RNA_PE125bp	this study	this study	EGAS00001004810
SJTALL030598_D1	T-ALL	NA	NoFusion	26.1906	15.2916	Stranded_total_RNA_PE125bp	this study	this study	EGAS00001004810
SJTALL030640_D1	T-ALL	NA	NoFusion	108.775	33.9336	Stranded_total_RNA_PE125bp	this study	this study	EGAS00001004810
SJTALL030684_D1	T-ALL	NA	NoFusion	87.2913	66.977	Stranded_total_RNA_PE125bp	this study	this study	EGAS00001004810
SJTALL030761_D1	T-ALL	NA	NUP214-ABL1;AP1B1-TTC28	69.1922	80.6342	Stranded_total_RNA_PE125bp	this study	this study	EGAS00001004810
SJTALL030880_D1	T-ALL	NA	PICALM-MLLT10	61.2921	63.1307	Stranded_total_RNA_PE125bp	this study	this study	EGAS00001004810
SJTALL030907_D1	T-ALL	NA	PICALM-MLLT10	35.1918	62.8653	Stranded_total_RNA_PE125bp	this study	this study	EGAS00001004810
SJTALL030916_D1	T-ALL	NA	PNISR-KHDRBS2	59.1153	82.9492	Stranded_total_RNA_PE125bp	this study	this study	EGAS00001004810
SJTALL030933_D1	T-ALL	NA	STIL-TAL1;ETS1-IKZF1;TBL1XR1-JAK2	101.381	46.7438	Stranded_total_RNA_PE125bp	this study	this study	EGAS00001004810
SJTALL030963_D1	T-ALL	NA	NoFusion	99.1788	50.0234	Stranded_total_RNA_PE125bp	this study	this study	EGAS00001004810
SJTALL031014_D1	T-ALL	ETP	NoFusion	27.5087	76.7657	Stranded_total_RNA_PE125bp	this study	this study	EGAS00001004810
SJTALL031015_D1	T-ALL	NA	STAG2-CAPRIN1(LMO2 5')	81.4288	58.8748	Stranded_total_RNA_PE125bp	this study	this study	EGAS00001004810
SJTALL031107_D1	T-ALL	NA	NoFusion	36.785	55.6074	Stranded_total_RNA_PE125bp	this study	this study	EGAS00001004810
SJTALL031201_D1	T-ALL	NA	TCF7-SPI1	69.673	5.13941	Stranded_total_RNA_PE125bp	this study	this study	EGAS00001004810
SJTALL031213_D1	T-ALL	NA	STAG2-CAPRIN1(LMO2 5')	80.9885	58.2449	Stranded_total_RNA_PE125bp	this study	this study	EGAS00001004810
SJTALL031265_D1	T-ALL	NA	STIL-TAL1	81.7955	38.0592	Stranded_total_RNA_PE125bp	this study	this study	EGAS00001004810
SJAML001417_D1	AML	AML	NPM1-CCDC28A	14.3903	43.6008	Stranded_total_RNA_PE100bp	this study	this study	EGAS00001004810
SJAML030004_D1	AML	AML	CREBBP-KAT6A	-7.28581	27.1021	Stranded_total_RNA_PE100bp	this study	this study	EGAS00001004810
SJAML030006_D1	AML	AML	DEK-NUP214	6.30249	41.6588	Stranded_total_RNA_PE100bp	this study	this study	EGAS00001004810
SJAML030024_D1	AML	AML	NoFusion	5.08035	43.6153	Stranded_total_RNA_PE100bp	this study	this study	EGAS00001004810
SJAML030025_D1	AML	AML	NoFusion	26.4086	78.1517	Stranded_total_RNA_PE100bp	this study	this study	EGAS00001004810
SJAML030069_D1	AML	AML	KMT2A-AFDN	7.54898	42.2847	Stranded_total_RNA_PE125bp	this study	this study	EGAS00001004810
SJAML030077_D1	AML	AML	NoFusion	16.7946	21.9902	Stranded_total_RNA_PE125bp	this study	this study	EGAS00001004810
SJAML030079_D1	AML	AML	KMT2A-MLLT3	26.0439	28.4648	Stranded_total_RNA_PE125bp	this study	this study	EGAS00001004810
SJAML030085_D1	AML	AML	KMT2A-MLLT6	-3.16716	28.0567	Stranded_total_RNA_PE125bp	this study	this study	EGAS00001004810
SJAML030099_D1	AML	AML	NoFusion	16.9021	22.1417	Stranded_total_RNA_PE125bp	this study	this study	EGAS00001004810
SJAML030118_D1	AML	AML	NoFusion	-4.29911	26.5228	Stranded_total_RNA_PE125bp	this study	this study	EGAS00001004810
SJAML030119_D1	AML	AML	RUNX1-RUNX1T1	-16.8324	47.9793	Stranded_total_RNA_PE125bp	this study	this study	EGAS00001004810
SJAML030120_D1	AML	AML	CBFA2T3-GLIS2	24.563	27.8207	Stranded_total_RNA_PE125bp	this study	this study	EGAS00001004810
SJAML030151_D1	AML	AML	CBFB-MYH11	-7.71463	45.1745	Stranded_total_RNA_PE125bp	this study	this study	EGAS00001004810
SJAML030153_D1	AML	AML	NoFusion	1.91383	27.0213	Stranded_total_RNA_PE125bp	this study	this study	EGAS00001004810
SJAML030155_D1	AML	AML	KMT2A-MLLT3	25.2579	29.0855	Stranded_total_RNA_PE125bp	this study	this study	EGAS00001004810
SJAML030156_D1	AML	AML	NoFusion	14.7874	33.2914	Stranded_total_RNA_PE125bp	this study	this study	EGAS00001004810
SJAML030163_D1	AML	AML	RUNX1-RUNX1T1	-19.3887	47.0896	Stranded_total_RNA_PE125bp	this study	this study	EGAS00001004810
SJAML030186_D1	AML	AML	NoFusion	16.0595	36.2661	Stranded_total_RNA_PE125bp	this study	this study	EGAS00001004810
SJAML030195_D1	AML	AML	RUNX1-RUNX1T1	-17.7709	46.4309	Stranded_total_RNA_PE125bp	this study	this study	EGAS00001004810
SJAML030200_D1	AML	AML	ELL-KMT2A	3.94789	36.9582	Stranded_total_RNA_PE125bp	this study	this study	EGAS00001004810
SJAML030208_D1	AML	AML	RUNX1-RUNX1T1	-18.2452	46.4724	Stranded_total_RNA_PE125bp	this study	this study	EGAS00001004810
SJAML030209_D1	AML	AML	NoFusion	24.1898	17.89	Stranded_total_RNA_PE125bp	this study	this study	EGAS00001004810
SJAML030231_D1	AML	AML	CBFB-MYH11	-5.94134	43.6652	Stranded_total_RNA_PE125bp	this study	this study	EGAS00001004810
SJAML030233_D1	AML	AML	PML-RARA	11.5261	44.6082	Stranded_total_RNA_PE125bp	this study	this study	EGAS00001004810
SJAML030286_D1	AML	AML	NoFusion	5.89733	40.0563	Stranded_total_RNA_PE125bp	this study	this study	EGAS00001004810
SJAML030287_D1	AML	AML	PML-RARA	11.6376	44.5716	Stranded_total_RNA_PE125bp	this study	this study	EGAS00001004810
SJAML030297_D1	AML	AML	NoFusion	10.8929	37.3463	Stranded_total_RNA_PE125bp	this study	this study	EGAS00001004810
SJAML030320_D1	AML	AML	NoFusion	1.43393	35.0896	Stranded_total_RNA_PE125bp	this study	this study	EGAS00001004810
SJAML030322_D1	AML	AML	NoFusion	4.94611	38.5235	Stranded_total_RNA_PE125bp	this study	this study	EGAS00001004810
SJAML030324_D1	AML	AML	MLLT10-UBE4A	-3.89567	27.7672	Stranded_total_RNA_PE125bp	this study	this study	EGAS00001004810
SJAML030345_D1	AML	AML	NoFusion	7.27461	40.2468	Stranded_total_RNA_PE125bp	this study	this study	EGAS00001004810
SJAML030361_D1	AML	AML	KMT2A-MLLT10	-1.26141	28.0991	Stranded_total_RNA_PE125bp	this study	this study	EGAS00001004810
SJAML030410_D1	AML	AML	HOXA13-CDK6	28.7091	71.202	Stranded_total_RNA_PE125bp	this study	this study	EGAS00001004810
SJAML030416_D1	AML	AML	NONO-ZFP36L1	16.8795	53.8962	Stranded_total_RNA_PE125bp	this study	this study	EGAS00001004810
SJAML030430_D1	AML	AML	CBFB-MYH11	-6.80443	44.9171	Stranded_total_RNA_PE125bp	this study	this study	EGAS00001004810
SJAML030431_D1	AML	AML	NFIC-SAFB	24.4158	75.2292	Stranded_total_RNA_PE125bp	this study	this study	EGAS00001004810
SJAML030440_D1	AML	AML	KMT2A-MLLT3	12.2219	37.2493	Stranded_total_RNA_PE125bp	this study	this study	EGAS00001004810
SJAML030454_D1	AML	AML	RUNX1-RUNX1T1	-12.4193	47.2249	Stranded_total_RNA_PE125bp	this study	this study	EGAS00001004810
SJAML030459_D1	AML	AML	MLLT10-PICALM	38.6222	65.463	Stranded_total_RNA_PE125bp	this study	this study	EGAS00001004810
SJAML030464_D1	AML	AML	KMT2A-MLLT3	-5.0093	23.761	Stranded_total_RNA_PE125bp	this study	this study	EGAS00001004810
SJAML030471_D1	AML	AML	RUNX1-RUNX1T1	-18.9429	46.0099	Stranded_total_RNA_PE125bp	this study	this study	EGAS00001004810
SJAML030509_D1	AML	AML	RUNX1-CBFA2T3	-21.5774	43.9597	Stranded_total_RNA_PE125bp	this study	this study	EGAS00001004810
SJAML030510_D1	AML	AML	NoFusion	17.9211	51.0477	Stranded_total_RNA_PE125bp	this study	this study	EGAS00001004810
SJAML030534_D1	AML	AML	KMT2A-ELL	2.39189	36.4317	Stranded_total_RNA_PE125bp	this study	this study	EGAS00001004810
SJAML030547_D1	AML	AML	RUNX1-EVX1	10.2981	49.1387	Stranded_total_RNA_PE125bp	this study	this study	EGAS00001004810
SJAML030560_D1	AML	AML	NoFusion	11.9509	34.7505	Stranded_total_RNA_PE125bp	this study	this study	EGAS00001004810
SJAML030561_D1	AML	AML	CBFB-MYH11	-11.4591	47.362	Stranded_total_RNA_PE125bp	this study	this study	EGAS00001004810
SJAML030592_D1	AML	AML	RUNX1-RUNX1T1	-23.5904	44.3077	Stranded_total_RNA_PE125bp	this study	this study	EGAS00001004810
SJAML030601_D1	AML	AML	RUNX1-RUNX1T1	-23.0605	44.5701	Stranded_total_RNA_PE125bp	this study	this study	EGAS00001004810
SJAML030612_D1	AML	AML	CBFB-MYH11	-5.14452	47.1073	Stranded_total_RNA_PE125bp	this study	this study	EGAS00001004810
SJAML030624_D1	AML	AML	NoFusion	-2.09666	23.8625	Stranded_total_RNA_PE125bp	this study	this study	EGAS00001004810
SJAML030669_D1	AML	AML	RUNX1-RUNX1T1	-21.1964	45.9184	Stranded_total_RNA_PE125bp	this study	this study	EGAS00001004810
SJAML030683_D1	AML	AML	CBFB-MYH11	-6.6017	45.5303	Stranded_total_RNA_PE125bp	this study	this study	EGAS00001004810
SJAML030689_D1	AML	AML	KMT2A-MLLT3	-3.1081	17.7674	Stranded_total_RNA_PE125bp	this study	this study	EGAS00001004810
SJAML030690_D1	AML	AML	NoFusion	15.896	42.1812	Stranded_total_RNA_PE125bp	this study	this study	EGAS00001004810
SJAML030708_D1	AML	AML	SIK3-ARHGEF12	9.2386	38.3968	Stranded_total_RNA_PE125bp	this study	this study	EGAS00001004810
SJAML030714_D1	AML	AML	NoFusion	18.8304	50.5213	Stranded_total_RNA_PE125bp	this study	this study	EGAS00001004810
SJAML030727_D1	AML	AML	N4BP2L1-ZMYM2	14.5703	29.8802	Stranded_total_RNA_PE125bp	this study	this study	EGAS00001004810
SJAML030773_D1	AML	AML	TEC-MLLT10	24.6817	18.0101	Stranded_total_RNA_PE125bp	this study	this study	EGAS00001004810
SJAML030778_D1	AML	AML	NoFusion	10.2901	39.1003	Stranded_total_RNA_PE125bp	this study	this study	EGAS00001004810
SJAML030799_D1	AML	AML	NoFusion	14.7029	31.0128	Stranded_total_RNA_PE125bp	this study	this study	EGAS00001004810
SJAML030852_D1	AML	AML	CREBBP-KAT6A	7.29769	21.4937	Stranded_total_RNA_PE125bp	this study	this study	EGAS00001004810
SJAML030881_D1	AML	AML	RUNX1-RUNX1T1	-19.8965	45.6493	Stranded_total_RNA_PE125bp	this study	this study	EGAS00001004810
SJAML030934_D1	AML	AML	NoFusion	2.69396	42.5812	Stranded_total_RNA_PE125bp	this study	this study	EGAS00001004810
SJAML030947_D1	AML	AML	NoFusion	22.1666	37.4545	Stranded_total_RNA_PE125bp	this study	this study	EGAS00001004810
SJAML030987_D1	AML	AML	MLLT10-DNAJC1	-6.50692	24.3081	Stranded_total_RNA_PE125bp	this study	this study	EGAS00001004810
SJAML030988_D1	AML	AML	MLLT10-PICALM	15.0262	65.8106	Stranded_total_RNA_PE125bp	this study	this study	EGAS00001004810
SJAML031022_D1	AML	AML	RUNX1-RUNX1T1	-20.8027	46.5918	Stranded_total_RNA_PE125bp	this study	this study	EGAS00001004810
SJAML031051_D1	AML	AML	KMT2A-MLLT6	-5.97005	24.1255	Stranded_total_RNA_PE125bp	this study	this study	EGAS00001004810
SJAML031065_D1	AML	AML	NoFusion	17.0948	9.21852	Stranded_total_RNA_PE125bp	this study	this study	EGAS00001004810
SJAML031075_D1	AML	AML	NoFusion	27.8204	28.2257	Stranded_total_RNA_PE125bp	this study	this study	EGAS00001004810
SJAML031082_D1	AML	AML	ERG-FUS	13.4969	48.1966	Stranded_total_RNA_PE125bp	this study	this study	EGAS00001004810
SJAML031106_D1	AML	AML	NoFusion	4.97019	38.0562	Stranded_total_RNA_PE125bp	this study	this study	EGAS00001004810
SJAML031120_D1	AML	AML	KMT2A-MLLT3	-0.602382	28.3855	Stranded_total_RNA_PE125bp	this study	this study	EGAS00001004810
SJAML031121_D1	AML	AML	MYB-GATA1	29.0272	29.1573	Stranded_total_RNA_PE125bp	this study	this study	EGAS00001004810
SJAML031186_D1	AML	AML	RUNX1-RUNX1T1	-16.9184	48.7742	Stranded_total_RNA_PE125bp	this study	this study	EGAS00001004810
SJAML031200_D1	AML	AML	NoFusion	-21.2265	46.9185	Stranded_total_RNA_PE125bp	this study	this study	EGAS00001004810
SJAML031206_D1	AML	AML	NoFusion	12.8542	35.0299	Stranded_total_RNA_PE125bp	this study	this study	EGAS00001004810
SJAML031249_D1	AML	AML	KMT2A-MLLT3	-4.24383	23.9177	Stranded_total_RNA_PE125bp	this study	this study	EGAS00001004810
SJAML031259_D1	AML	AML	TTC3-CBFB	-4.85248	46.4243	Stranded_total_RNA_PE125bp	this study	this study	EGAS00001004810
SJAML031272_D2	AML	AML	NoFusion	21.6398	37.1473	Stranded_total_RNA_PE125bp	this study	this study	EGAS00001004810
SJAML031300_D1	AML	AML	MLLT10-ARMC3	26.9975	28.7604	Stranded_total_RNA_PE125bp	this study	this study	EGAS00001004810
SJAML031302_D2	AML	AML	CBFB-MYH11	-5.84771	46.0438	Stranded_total_RNA_PE125bp	this study	this study	EGAS00001004810
SJAML031311_D1	AML	AML	KMT2A-MLLT10	-2.68621	23.994	Stranded_total_RNA_PE125bp	this study	this study	EGAS00001004810
SJAML031312_D1	AML	AML	NoFusion	18.9504	50.5455	Stranded_total_RNA_PE125bp	this study	this study	EGAS00001004810
SJAML031316_D1	AML	AML	KMT2A-AFDN	14.5391	36.7901	Stranded_total_RNA_PE125bp	this study	this study	EGAS00001004810
SJAML031336_D1	AML	AML	RUNX1-RUNX1T1	-23.0897	46.2026	Stranded_total_RNA_PE125bp	this study	this study	EGAS00001004810
SJAML031343_D1	AML	AML	C5ORF56-C15ORF53	10.6023	37.7056	Stranded_total_RNA_PE125bp	this study	this study	EGAS00001004810
SJAML031359_D1	AML	AML	NoFusion	19.6732	34.5777	Stranded_total_RNA_PE125bp	this study	this study	EGAS00001004810
SJAML031399_D1	AML	AML	KMT2A-AFDN	-1.04085	27.6656	Stranded_total_RNA_PE125bp	this study	this study	EGAS00001004810
SJAML031409_D1	AML	AML	RUNX1-CBFA2T2	-13.8365	46.9874	Stranded_total_RNA_PE125bp	this study	this study	EGAS00001004810
SJAML031417_D1	AML	AML	KMT2A-MLLT1	-3.96788	25.2081	Stranded_total_RNA_PE125bp	this study	this study	EGAS00001004810
SJAML031419_D1	AML	AML	NoFusion	9.21	27.9158	Stranded_total_RNA_PE125bp	this study	this study	EGAS00001004810
SJAML031469_D1	AML	AML	RUNX1-RUNX1T1	-22.302	45.5976	Stranded_total_RNA_PE125bp	this study	this study	EGAS00001004810
SJAML031477_D1	AML	AML	NoFusion	24.4176	15.8359	Stranded_total_RNA_PE125bp	this study	this study	EGAS00001004810
SJBALL031307_D1	MPAL	MPAL(B/M?)	NoFusion	-56.9586	-79.5309	Stranded_total_RNA_PE125bp	this study	this study	EGAS00001004810
SJHM031438_D1	MPAL	MPAL(T/M?)	NoFusion	29.5392	72.0537	Stranded_total_RNA_PE125bp	this study	this study	EGAS00001004810
SJHM030269_D1	MPAL	MPAL(KMT2A)	KMT2A-MLLT1	-2.4469	18.0642	Stranded_total_RNA_PE125bp	this study	this study	EGAS00001004810
SJHM030302_D1	MPAL	MPAL(KMT2A)	KMT2A-EPS15	-44.466	22.2789	Stranded_total_RNA_PE125bp	this study	this study	EGAS00001004810
SJHM030369_D1	MPAL	MPAL(T/M?)	CBFA2T3-GLIS3	26.5313	27.1012	Stranded_total_RNA_PE125bp	this study	this study	EGAS00001004810
SJHM031626_D1	MPAL	MPAL(KMT2A)	KMT2A-AFDN	39.2726	62.8655	Stranded_total_RNA_PE125bp	this study	this study	EGAS00001004810
SJHM030100_D1	MPAL	MPAL(KMT2A)	AFF1-KMT2A	-43.3089	12.5545	Stranded_total_RNA_PE125bp	this study	this study	EGAS00001004810
SJTALL030047_D1	MPAL	MPAL(T/M?)	NoFusion	27.3058	60.0213	Stranded_total_RNA_PE125bp	Alexander et al. Nature 2018	30209392	phs000464
SJAML031434_D1	AML	AML	NUP98-NSD1	1.92612	35.5196	Stranded_total_RNA_PE125bp	this study	this study	EGAS00001004810
SJAML031528_D1	AML	AML	KMT2A-ELL	8.23155	20.249	Stranded_total_RNA_PE125bp	this study	this study	EGAS00001004810
SJAML031579_D1	AML	AML	NoFusion	11.2362	2.30489	Stranded_total_RNA_PE125bp	this study	this study	EGAS00001004810
SJAML031601_D1	AML	AML	RUNX1-RUNX1T1	-15.8473	47.3337	Stranded_total_RNA_PE125bp	this study	this study	EGAS00001004810
SJAML031606_D1	AML	AML	RUNX1-POU2F2	14.3246	28.8029	Stranded_total_RNA_PE125bp	this study	this study	EGAS00001004810
SJAML031686_D1	AML	AML	RUNX1-CBFA2T3	-14.8414	46.6205	Stranded_total_RNA_PE125bp	this study	this study	EGAS00001004810
SJAML031719_D1	AML	AML	TBL1XR1-RARB	19.0733	33.5017	Stranded_total_RNA_PE125bp	this study	this study	EGAS00001004810
SJAML031760_D1	AML	AML	RUNX1-RUNX1T1	-16.3579	46.8981	Stranded_total_RNA_PE125bp	this study	this study	EGAS00001004810
SJAML031781_D1	AML	AML	NoFusion	9.55563	34.2829	Stranded_total_RNA_PE125bp	this study	this study	EGAS00001004810
SJAML031855_D1	AML	AML	CBFB-MYH11	-6.21899	47.1058	Stranded_total_RNA_PE125bp	this study	this study	EGAS00001004810
SJAML031924_D1	AML	AML	NUP214-DEK	10.6491	41.4643	Stranded_total_RNA_PE125bp	this study	this study	EGAS00001004810
SJTALL031315_D1	T-ALL	ETP	ETV6-HOXA13	28.7437	70.5524	Stranded_total_RNA_PE125bp	this study	this study	EGAS00001004810
SJTALL031337_D1	T-ALL	NA	NoFusion	100.569	33.3183	Stranded_total_RNA_PE125bp	this study	this study	EGAS00001004810
SJTALL031446_D1	T-ALL	NA	STIL-TAL1	97.8944	59.6153	Stranded_total_RNA_PE125bp	this study	this study	EGAS00001004810
SJTALL031474_D1	T-ALL	NA	KMT2A-AFDN	73.5111	56.1193	Stranded_total_RNA_PE125bp	this study	this study	EGAS00001004810
SJTALL031594_D1	T-ALL	NA	LMO2-TRA	99.0497	49.5009	Stranded_total_RNA_PE125bp	this study	this study	EGAS00001004810
SJTALL031632_D1	T-ALL	NA	LMO2-TRA	82.8389	38.6407	Stranded_total_RNA_PE125bp	this study	this study	EGAS00001004810
SJTALL031640_D1	T-ALL	NA	NoFusion	39.6478	65.8425	Stranded_total_RNA_PE125bp	this study	this study	EGAS00001004810
SJTALL031662_D1	T-ALL	NA	PICALM-MLLT10	68.6267	51.0442	Stranded_total_RNA_PE125bp	this study	this study	EGAS00001004810
SJTALL031798_D1	T-ALL	NA	PICALM-MLLT10	35.3688	62.4807	Stranded_total_RNA_PE125bp	this study	this study	EGAS00001004810
SJTALL031832_D1	T-ALL	NA	TLX1-TRB	67.4729	75.0717	Stranded_total_RNA_PE125bp	this study	this study	EGAS00001004810
SJTALL031904_D1	T-ALL	NA	PICALM-MLLT10	66.6447	61.8857	Stranded_total_RNA_PE125bp	this study	this study	EGAS00001004810
SJBALL047020_D1	T-ALL	NA	NoFusion	87.4835	67.6942	Stranded_total_RNA_PE100bp	this study	this study	EGAS00001004810
SJBALL047367_D1	T-ALL	NA	NoFusion	11.2222	52.6856	Stranded_total_RNA_PE100bp	this study	this study	EGAS00001004810
SJTALL005006_D2	T-ALL	NA	BCL11B enh amp	-0.0464829	69.6821	Stranded_total_RNA_PE100bp	this study	this study	EGAS00001004810
SJTALL037_D	T-ALL	notETP	STIL-TAL1	92.1943	47.4289	Stranded_total_RNA_PE100bp	this study	this study	EGAS00001004810
SJTALL068_D	T-ALL	notETP	NoFusion	100.714	38.6221	Stranded_total_RNA_PE100bp	this study	this study	EGAS00001004810
SJTALL076_D	T-ALL	NA	GRHL1-MYB	75.2465	63.7926	Stranded_total_RNA_PE100bp	this study	this study	EGAS00001004810
SJTALL088_D	T-ALL	NA	PICALM-MLLT10	63.7802	70.568	Stranded_total_RNA_PE100bp	this study	this study	EGAS00001004810
SJALL044291_D1	T-ALL	NA	BCL11B-ARID1B	0.383755	73.2225	Stranded_total_RNA_PE100bp	this study	this study	EGAS00001004810
SJALL044300_D1	T-ALL	NA	PICALM-MLLT10	25.8454	69.0981	Stranded_total_RNA_PE100bp	this study	this study	EGAS00001004810
SJALL047527_D1	T-ALL	NA	LYL1-IGH	90.7838	45.3294	Stranded_total_RNA_PE100bp	this study	this study	EGAS00001004810
SJALL047977_D1	T-ALL	NA	NoFusion	46.2611	77.0946	Stranded_total_RNA_PE100bp	this study	this study	EGAS00001004810
SJALL048081_D1	T-ALL	NA	SET-NUP214	31.3269	68.752	Stranded_total_RNA_PE100bp	this study	this study	EGAS00001004810
SJALL048085_D1	T-ALL	NA	TRB-TLX1	74.6699	74.1167	Stranded_total_RNA_PE100bp	this study	this study	EGAS00001004810
SJALL048087_D1	T-ALL	NA	NoFusion	23.2429	68.9982	Stranded_total_RNA_PE100bp	this study	this study	EGAS00001004810
SJTALL001_D	T-ALL	ETP	MED14-HOXA9;ABCC9-ITPR2	23.6073	69.1186	Stranded_total_RNA_PE100bp	Waanders et al. Blood Cancer Disc 2020	32793890	EGAS00001003975
SJTALL005_D	T-ALL	ETP	NUP98-RAP1GDS1	32.1868	69.9887	Stranded_total_RNA_PE100bp	this study	this study	EGAS00001004810
SJTALL005003_D2	T-ALL	NA	NoFusion	30.1552	60.5926	Stranded_total_RNA_PE100bp	this study	this study	EGAS00001004810
SJTALL016_D	T-ALL	notETP	NoFusion	88.9749	48.2321	Stranded_total_RNA_PE100bp	this study	this study	EGAS00001004810
SJTALL019_D	T-ALL	notETP	NUP214-ABL1	40.2126	71.8644	Stranded_total_RNA_PE100bp	this study	this study	EGAS00001004810
SJTALL020_D	T-ALL	notETP	NFIX-TRB	98.8772	47.5717	Stranded_total_RNA_PE100bp	this study	this study	EGAS00001004810
SJTALL021_D	T-ALL	notETP	NoFusion	99.5934	48.1714	Stranded_total_RNA_PE100bp	this study	this study	EGAS00001004810
SJTALL022_D	T-ALL	notETP	TLX1-TRB	58.1091	70.9804	Stranded_total_RNA_PE100bp	this study	this study	EGAS00001004810
SJTALL023_D	T-ALL	notETP	NoFusion	87.6958	39.8374	Stranded_total_RNA_PE100bp	Waanders et al. Blood Cancer Disc 2020	32793890	EGAS00001003975
SJTALL024_D	T-ALL	notETP	STIL-TAL1	99.0681	38.4554	Stranded_total_RNA_PE100bp	this study	this study	EGAS00001004810
SJTALL025_D	T-ALL	notETP	STIL-TAL1	86.631	40.7233	Stranded_total_RNA_PE100bp	this study	this study	EGAS00001004810
SJTALL026_D	T-ALL	notETP	NoFusion	102.22	38.0944	Stranded_total_RNA_PE100bp	this study	this study	EGAS00001004810
SJTALL027_D	T-ALL	notETP	STIL-TAL1	86.6642	45.2959	Stranded_total_RNA_PE100bp	this study	this study	EGAS00001004810
SJTALL028_D	T-ALL	notETP	NoFusion	74.8248	64.1418	Stranded_total_RNA_PE100bp	this study	this study	EGAS00001004810
SJTALL029_D	T-ALL	notETP	NoFusion	60.1195	81.4295	Stranded_total_RNA_PE100bp	this study	this study	EGAS00001004810
SJTALL032_D	T-ALL	notETP	STIL-TAL1	100.899	37.7923	Stranded_total_RNA_PE100bp	this study	this study	EGAS00001004810
SJTALL033_D	T-ALL	notETP	TRB-NFIX	90.9929	46.313	Stranded_total_RNA_PE100bp	this study	this study	EGAS00001004810
SJTALL035_D	T-ALL	notETP	NoFusion	84.252	45.0839	Stranded_total_RNA_PE100bp	this study	this study	EGAS00001004810
SJTALL036_D	T-ALL	notETP	NoFusion	97.752	47.5453	Stranded_total_RNA_PE100bp	this study	this study	EGAS00001004810
SJTALL038_D	T-ALL	notETP	NoFusion	75.4006	62.7539	Stranded_total_RNA_PE100bp	this study	this study	EGAS00001004810
SJTALL040_D	T-ALL	notETP	STIL-TAL1	101.581	39.1314	Stranded_total_RNA_PE100bp	this study	this study	EGAS00001004810
SJTALL041_D	T-ALL	notETP	NoFusion	47.6496	77.5877	Stranded_total_RNA_PE100bp	this study	this study	EGAS00001004810
SJTALL043806_D1	T-ALL	NA	NoFusion	68.4443	73.9904	Stranded_total_RNA_PE100bp	this study	this study	EGAS00001004810
SJTALL043821_D1	T-ALL	NA	NoFusion	70.7861	74.7791	Stranded_total_RNA_PE100bp	this study	this study	EGAS00001004810
SJTALL043832_D1	T-ALL	NA	STIL-TAL1	90.9717	51.8115	Stranded_total_RNA_PE100bp	this study	this study	EGAS00001004810
SJTALL063_D	T-ALL	NA	NoFusion	65.8695	76.6274	Stranded_total_RNA_PE100bp	this study	this study	EGAS00001004810
SJTALL064_D	T-ALL	NA	NoFusion	66.4036	76.2067	Stranded_total_RNA_PE100bp	this study	this study	EGAS00001004810
SJTALL065_D	T-ALL	NA	UBE3C-KCNT2	32.0262	65.8176	Stranded_total_RNA_PE100bp	this study	this study	EGAS00001004810
SJTALL066_D	T-ALL	notETP	NoFusion	86.0653	67.2222	Stranded_total_RNA_PE100bp	this study	this study	EGAS00001004810
SJTALL067_D	T-ALL	notETP	NoFusion	97.3916	46.5039	Stranded_total_RNA_PE100bp	this study	this study	EGAS00001004810
SJTALL069_D	T-ALL	notETP	KMT2A-MLLT1	74.7821	56.8701	Stranded_total_RNA_PE100bp	this study	this study	EGAS00001004810
SJTALL070_D	T-ALL	notETP	SET-NUP214	62.0382	67.5314	Stranded_total_RNA_PE100bp	this study	this study	EGAS00001004810
SJTALL071_D	T-ALL	notETP	NoFusion	31.4137	71.8592	Stranded_total_RNA_PE100bp	this study	this study	EGAS00001004810
SJTALL072_D	T-ALL	NA	NoFusion	85.9219	67.3446	Stranded_total_RNA_PE100bp	this study	this study	EGAS00001004810
SJTALL073_D	T-ALL	NA	NoFusion	97.7781	43.7234	Stranded_total_RNA_PE100bp	this study	this study	EGAS00001004810
SJTALL074_D	T-ALL	NA	NoFusion	59.0645	78.5211	Stranded_total_RNA_PE100bp	this study	this study	EGAS00001004810
SJTALL075_D	T-ALL	notETP	HNRNPH1-MLLT10	32.5634	68.7818	Stranded_total_RNA_PE100bp	this study	this study	EGAS00001004810
SJTALL078_D	T-ALL	notETP	NoFusion	63.9072	69.8071	Stranded_total_RNA_PE100bp	this study	this study	EGAS00001004810
SJTALL079_D	T-ALL	notETP	NoFusion	98.529	41.2648	Stranded_total_RNA_PE100bp	this study	this study	EGAS00001004810
SJTALL080_D	T-ALL	notETP	NoFusion	64.7399	76.6899	Stranded_total_RNA_PE100bp	this study	this study	EGAS00001004810
SJTALL081_D	T-ALL	notETP	PCNT-JAK2;LMAN2-EFCAB11	55.8352	76.4455	Stranded_total_RNA_PE100bp	this study	this study	EGAS00001004810
SJTALL083_D	T-ALL	NA	NoFusion	98.7656	53.5792	Stranded_total_RNA_PE100bp	this study	this study	EGAS00001004810
SJTALL084_D	T-ALL	NA	DDX3X-MLLT10	66.3169	63.2368	Stranded_total_RNA_PE100bp	this study	this study	EGAS00001004810
SJTALL085_D	T-ALL	NA	NoFusion	81.782	60.852	Stranded_total_RNA_PE100bp	this study	this study	EGAS00001004810
SJTALL087_D	T-ALL	NA	STIL-TAL1	85.3087	40.778	Stranded_total_RNA_PE100bp	this study	this study	EGAS00001004810
SJTALL221_D	T-ALL	NA	NoFusion	55.7707	71.0711	Stranded_total_RNA_PE100bp	this study	this study	EGAS00001004810
SJBALL013901_D1	T-ALL	NA	NoFusion	70.8248	78.7336	Stranded_total_RNA_PE100bp	this study	this study	EGAS00001004810
SJBALL013872_D1	T-ALL	NA	PICALM-MLLT10	12.7096	53.8293	Stranded_total_RNA_PE100bp	this study	this study	EGAS00001004810
SJBALL013864_D1	T-ALL	NA	NoFusion	91.3009	55.8427	Stranded_total_RNA_PE100bp	this study	this study	EGAS00001004810
SJBALL013861_D1	T-ALL	NA	NoFusion	71.0055	77.943	Stranded_total_RNA_PE100bp	this study	this study	EGAS00001004810
SJALL049112_D1	T-ALL	NA	ETV3-NCOA2	9.117	34.7071	Stranded_total_RNA_PE100bp	this study	this study	EGAS00001004810
SJALL049669_D1	T-ALL	NA	NFATC3-ZSCAN5C	13.1946	51.8797	Stranded_total_RNA_PE100bp	this study	this study	EGAS00001004810
SJALL050551_D1	T-ALL	NA	NoFusion	27.5775	65.5171	Stranded_total_RNA_PE100bp	this study	this study	EGAS00001004810
SJALL054752_D1	T-ALL	NA	NoFusion	47.281	74.3235	Stranded_total_RNA_PE100bp	this study	this study	EGAS00001004810
SJALL054757_D1	T-ALL	NA	KCNAB2-CIZ1	22.0631	72.4826	Stranded_total_RNA_PE100bp	this study	this study	EGAS00001004810
SJALL055895_D1	T-ALL	NA	SET-NUP214	30.7809	67.2082	Stranded_total_RNA_PE100bp	this study	this study	EGAS00001004810
SJALL057920_D1	T-ALL	NA	NoFusion	109.25	37.4259	Stranded_total_RNA_PE100bp	this study	this study	EGAS00001004810
SJALL057922_D1	T-ALL	NA	NoFusion	93.3959	59.2565	Stranded_total_RNA_PE100bp	this study	this study	EGAS00001004810
SJALL057923_D1	T-ALL	NA	MYB-AHI1;STIL-TAL1	102.941	36.06	Stranded_total_RNA_PE100bp	this study	this study	EGAS00001004810
SJALL059516_D1	T-ALL	NA	NoFusion	33.9597	66.9719	Stranded_total_RNA_PE100bp	this study	this study	EGAS00001004810
SJALL059518_D1	T-ALL	NA	AC245088.2-AC245427.1	97.648	49.1535	Stranded_total_RNA_PE100bp	this study	this study	EGAS00001004810
SJALL059520_D1	T-ALL	NA	DDX3X-MLLT10	27.0151	73.1799	Stranded_total_RNA_PE100bp	this study	this study	EGAS00001004810
SJALL059528_D1	T-ALL	NA	NoFusion	9.58843	31.8702	Stranded_total_RNA_PE100bp	this study	this study	EGAS00001004810
SJALL059529_D1	T-ALL	NA	NUP214-ABL1	70.0503	79.3256	Stranded_total_RNA_PE100bp	this study	this study	EGAS00001004810
SJALL060401_D1	T-ALL	NA	BCL11B-ARID1B	-2.24555	71.6291	Stranded_total_RNA_PE100bp	this study	this study	EGAS00001004810
SJALL061697_D1	T-ALL	NA	NoFusion	26.4678	63.3788	Stranded_total_RNA_PE100bp	this study	this study	EGAS00001004810
SJALL061272_D1	T-ALL	NA	CTCF-NFATC3	49.067	77.0801	Stranded_total_RNA_PE100bp	this study	this study	EGAS00001004810
SJALL003226_D3	T-ALL	NA	NoFusion	83.098	59.3558	Stranded_total_RNA_PE100bp	this study	this study	EGAS00001004810
SJALL015715_D2	T-ALL	NA	EIF4G1-ECE2	35.0993	68.0502	Stranded_total_RNA_PE100bp	this study	this study	EGAS00001004810
SJALL018294_D2	T-ALL	NA	BCL11B-ARID1B	0.170026	70.1325	Stranded_total_RNA_PE100bp	this study	this study	EGAS00001004810
SJALL018298_D5	T-ALL	NA	NoFusion	73.2202	74.4723	Stranded_total_RNA_PE100bp	this study	this study	EGAS00001004810
SJALL048318_D5	T-ALL	NA	NoFusion	33.8229	69.7241	Stranded_total_RNA_PE100bp	this study	this study	EGAS00001004810
SJALL048330_D6	T-ALL	NA	NoFusion	89.296	46.0378	Stranded_total_RNA_PE100bp	this study	this study	EGAS00001004810
SJALL048338_D4	T-ALL	NA	KDM6A-JADE3	85.897	47.5937	Stranded_total_RNA_PE100bp	this study	this study	EGAS00001004810
SJALL048340_D3	T-ALL	NA	KMT2A-MLLT1;PDCD6IP-TASP1;DEXI-TASP1	76.0423	51.1549	Stranded_total_RNA_PE100bp	this study	this study	EGAS00001004810
SJALL048378_D5	T-ALL	NA	NoFusion	90.5169	50.8655	Stranded_total_RNA_PE100bp	this study	this study	EGAS00001004810
SJALL048383_D7	T-ALL	NA	RIC3-TRB;IGH-DLGAP5	95.2328	41.3606	Stranded_total_RNA_PE100bp	this study	this study	EGAS00001004810
SJALL048411_D6	T-ALL	NA	KMT2A-MLLT1;DEXI-TASP1;PDCD6IP-TASP1	76.2889	50.8559	Stranded_total_RNA_PE100bp	this study	this study	EGAS00001004810
SJALL048456_D5	T-ALL	NA	HNRNPC-ZNF219	92.7749	52.6129	Stranded_total_RNA_PE100bp	this study	this study	EGAS00001004810
SJALL048457_D6	T-ALL	NA	PICALM-MLLT10	62.5797	65.6549	Stranded_total_RNA_PE100bp	this study	this study	EGAS00001004810
SJALL048494_D3	T-ALL	NA	NoFusion	93.5772	49.1339	Stranded_total_RNA_PE100bp	this study	this study	EGAS00001004810
SJALL058377_D2	T-ALL	NA	NoFusion	83.6817	44.6725	Stranded_total_RNA_PE100bp	this study	this study	EGAS00001004810
SJALL060465_D2	T-ALL	NA	BCR-ABL1;HOXA10-TRDC	33.6396	65.6933	Stranded_total_RNA_PE100bp	this study	this study	EGAS00001004810
SJALL061928_D2	T-ALL	NA	CDK6-EVX1	30.6089	72.6097	Stranded_total_RNA_PE100bp	this study	this study	EGAS00001004810
SJTALL013_D	T-ALL	ETP	NAP1L1-MLLT10	29.0249	64.0968	Stranded_total_RNA_PE100bp	Waanders et al. Blood Cancer Disc 2020	32793890	EGAS00001003975
SJTALL054_D	T-ALL	notETP	NoFusion	58.1942	77.6677	Stranded_total_RNA_PE100bp	Waanders et al. Blood Cancer Disc 2020	32793890	EGAS00001003975
SJTALL094_D	T-ALL	notETP	TBL1XR1-ABL1	86.588	44.8685	Stranded_total_RNA_PE100bp	Waanders et al. Blood Cancer Disc 2020	32793890	EGAS00001003975
SJTALL139_D	T-ALL	notETP	STIL-TAL1	99.7985	42.3992	Stranded_total_RNA_PE100bp	Waanders et al. Blood Cancer Disc 2020	32793890	EGAS00001003975
SJTALL142_D	T-ALL	notETP	NoFusion	95.5791	45.2121	Stranded_total_RNA_PE100bp	Waanders et al. Blood Cancer Disc 2020	32793890	EGAS00001003975
SJTALL152_D	T-ALL	notETP	STIL-TAL1;PAFAH1B1-USP6	44.7713	71.6356	Stranded_total_RNA_PE100bp	Waanders et al. Blood Cancer Disc 2020	32793890	EGAS00001003975
SJALL068271_D1	T-ALL	ETP	BCL11B-SATB1	2.73902	59.4214	MLL-Stranded_total_RNA_PE100bp	German MLL	NA	Not available*
MLL_00223	T-ALL	notETP	NoFusion	24.0029	55.3928	MLL-Stranded_total_RNA_PE100bp	German MLL	NA	Not available*
MLL_00224	T-ALL	notETP	NoFusion	61.3174	77.8667	MLL-Stranded_total_RNA_PE100bp	German MLL	NA	Not available*
SJALL068272_D1	T-ALL	ETP	BCL11B enh amp	3.93259	64.0126	MLL-Stranded_total_RNA_PE100bp	German MLL	NA	Not available*
MLL_00226	T-ALL	ETP	NoFusion	35.2041	54.7889	MLL-Stranded_total_RNA_PE100bp	German MLL	NA	Not available*
SJALL068273_D1	T-ALL	ETP	CCDC26-BCL11B	4.13428	61.1843	MLL-Stranded_total_RNA_PE100bp	German MLL	NA	Not available*
MLL_00228	T-ALL	ETP	NoFusion	44.1834	46.8741	MLL-Stranded_total_RNA_PE100bp	German MLL	NA	Not available*
MLL_12298	T-ALL	notETP	TLX1-TCRA	56.3235	49.9692	MLL-Stranded_total_RNA_PE100bp	German MLL	NA	Not available*
MLL_12500	T-ALL	notETP	XPO1-MLLT10;WAC-XPO1;MLLT10-WAC	42.5426	36.9936	MLL-Stranded_total_RNA_PE100bp	German MLL	NA	Not available*
MLL_12512	T-ALL	notETP	TLX1-TCRB	55.5029	45.5316	MLL-Stranded_total_RNA_PE100bp	German MLL	NA	Not available*
MLL_12519	T-ALL	ETP	DDX3X-MLLT10	55.7203	39.6867	MLL-Stranded_total_RNA_PE100bp	German MLL	NA	Not available*
MLL_12546	T-ALL	notETP	NoFusion	40.902	14.1849	MLL-Stranded_total_RNA_PE100bp	German MLL	NA	Not available*
SJALL068277_D1	T-ALL	ETP	BCL11B enh amp	2.61216	61.9471	MLL-Stranded_total_RNA_PE100bp	German MLL	NA	Not available*
MLL_12559	T-ALL	ETP	NUP98-RAP1GDS1	19.9769	27.5513	MLL-Stranded_total_RNA_PE100bp	German MLL	NA	Not available*
MLL_12561	T-ALL	notETP	STIL-TAL1	59.2903	15.522	MLL-Stranded_total_RNA_PE100bp	German MLL	NA	Not available*
MLL_12766	T-ALL	notETP	NoFusion	50.5479	39.0422	MLL-Stranded_total_RNA_PE100bp	German MLL	NA	Not available*
MLL_13906	T-ALL	notETP	TLX1-TCRA	57.5464	47.7953	MLL-Stranded_total_RNA_PE100bp	German MLL	NA	Not available*
MLL_13972	T-ALL	notETP	TCRA-TLX1	56.1152	46.7215	MLL-Stranded_total_RNA_PE100bp	German MLL	NA	Not available*
MLL_13978	T-ALL	notETP	NoFusion	54.2283	29.4364	MLL-Stranded_total_RNA_PE100bp	German MLL	NA	Not available*
MLL_14315	T-ALL	notETP	NoFusion	55.3391	46.9304	MLL-Stranded_total_RNA_PE100bp	German MLL	NA	Not available*
MLL_14321	T-ALL	notETP	NoFusion	56.511	47.7846	MLL-Stranded_total_RNA_PE100bp	German MLL	NA	Not available*
SJALL068279_D1	T-ALL	ETP	BCL11B-ARID1B	5.00184	64.7146	MLL-Stranded_total_RNA_PE100bp	German MLL	NA	Not available*
MLL_14755	T-ALL	notETP	NoFusion	41.5216	14.7174	MLL-Stranded_total_RNA_PE100bp	German MLL	NA	Not available*
MLL_14757	T-ALL	notETP	NoFusion	55.7063	41.621	MLL-Stranded_total_RNA_PE100bp	German MLL	NA	Not available*
MLL_16409	T-ALL	notETP	SET-NUP214	57.9567	41.5434	MLL-Stranded_total_RNA_PE100bp	German MLL	NA	Not available*
MLL_19559	T-ALL	ETP	NoFusion	35.2862	53.7582	MLL-Stranded_total_RNA_PE100bp	German MLL	NA	Not available*
MLL_19689	T-ALL	notETP	CTNNB1-ETV6	14.7761	17.4949	MLL-Stranded_total_RNA_PE100bp	German MLL	NA	Not available*
MLL_19706	T-ALL	notETP	NUP214-ABL1	53.0929	38.4011	MLL-Stranded_total_RNA_PE100bp	German MLL	NA	Not available*
MLL_20402	T-ALL	notETP	TRB-AHI1	58.8984	30.2316	MLL-Stranded_total_RNA_PE100bp	German MLL	NA	Not available*
MLL_20888	T-ALL	ETP	ETV6-HOXA11-AS	28.3207	69.429	MLL-Stranded_total_RNA_PE100bp	German MLL	NA	Not available*
MLL_21276	T-ALL	notETP	NoFusion	36.0774	54.0915	MLL-Stranded_total_RNA_PE100bp	German MLL	NA	Not available*
MLL_21377	T-ALL	notETP	NUP98-RAP1GDS1	56.6697	41.6524	MLL-Stranded_total_RNA_PE100bp	German MLL	NA	Not available*
MLL_21385	T-ALL	ETP	PICALM-MLLT10	11.0566	6.13579	MLL-Stranded_total_RNA_PE100bp	German MLL	NA	Not available*
MLL_21971	T-ALL	notETP	NoFusion	27.9139	52.5876	MLL-Stranded_total_RNA_PE100bp	German MLL	NA	Not available*
MLL_21974	T-ALL	ETP	NoFusion	31.6753	49.8335	MLL-Stranded_total_RNA_PE100bp	German MLL	NA	Not available*
MLL_22147	T-ALL	ETP	NoFusion	19.6597	26.6591	MLL-Stranded_total_RNA_PE100bp	German MLL	NA	Not available*
SJALL068280_D1	T-ALL	ETP	BCL11B-ARID1B	4.8016	65.6957	MLL-Stranded_total_RNA_PE100bp	German MLL	NA	Not available*
MLL_22153	T-ALL	notETP	NoFusion	24.5524	54.5567	MLL-Stranded_total_RNA_PE100bp	German MLL	NA	Not available*
MLL_22162	T-ALL	ETP	NoFusion	14.6393	19.3919	MLL-Stranded_total_RNA_PE100bp	German MLL	NA	Not available*
MLL_22166	T-ALL	ETP	NoFusion	47.4432	52.1319	MLL-Stranded_total_RNA_PE100bp	German MLL	NA	Not available*
SJALL068281_D1	T-ALL	ETP	BCL11B enh amp	2.82109	65.6155	MLL-Stranded_total_RNA_PE100bp	German MLL	NA	Not available*
MLL_22168	T-ALL	notETP	NoFusion	47.4205	53.2704	MLL-Stranded_total_RNA_PE100bp	German MLL	NA	Not available*
MLL_22182	T-ALL	notETP	NoFusion	28.0989	53.8414	MLL-Stranded_total_RNA_PE100bp	German MLL	NA	Not available*
MLL_22183	T-ALL	notETP	TLX1-TCRA	53.3726	37.5377	MLL-Stranded_total_RNA_PE100bp	German MLL	NA	Not available*
MLL_22189	T-ALL	notETP	NoFusion	51.8161	34.7162	MLL-Stranded_total_RNA_PE100bp	German MLL	NA	Not available*
MLL_22502	T-ALL	notETP	NoFusion	50.1901	39.3518	MLL-Stranded_total_RNA_PE100bp	German MLL	NA	Not available*
MLL_22506	T-ALL	notETP	NoFusion	51.4658	26.66	MLL-Stranded_total_RNA_PE100bp	German MLL	NA	Not available*
MLL_22509	T-ALL	notETP	NoFusion	55.9935	49.1358	MLL-Stranded_total_RNA_PE100bp	German MLL	NA	Not available*
MLL_22599	T-ALL	notETP	NoFusion	52.0199	26.6659	MLL-Stranded_total_RNA_PE100bp	German MLL	NA	Not available*
MLL_22610	T-ALL	notETP	TAL1-TCRA	52.3557	24.9887	MLL-Stranded_total_RNA_PE100bp	German MLL	NA	Not available*
MLL_22613	T-ALL	notETP	NoFusion	45.8614	47.515	MLL-Stranded_total_RNA_PE100bp	German MLL	NA	Not available*
MLL_22616	T-ALL	notETP	NoFusion	57.2682	47.0425	MLL-Stranded_total_RNA_PE100bp	German MLL	NA	Not available*
MLL_22712	T-ALL	notETP	NoFusion	13.3504	4.2149	MLL-Stranded_total_RNA_PE100bp	German MLL	NA	Not available*
MLL_22737	T-ALL	notETP	TLX1-TCRA;SMAD7-DYM	57.459	45.0549	MLL-Stranded_total_RNA_PE100bp	German MLL	NA	Not available*
MLL_22747	T-ALL	notETP	NoFusion	60.5871	29.8169	MLL-Stranded_total_RNA_PE100bp	German MLL	NA	Not available*
MLL_23001	T-ALL	notETP	TLX1-TCRA	48.8921	30.6468	MLL-Stranded_total_RNA_PE100bp	German MLL	NA	Not available*
MLL_23002	T-ALL	notETP	NoFusion	53.1118	27.9522	MLL-Stranded_total_RNA_PE100bp	German MLL	NA	Not available*
MLL_23003	T-ALL	ETP	SET-NUP214	41.6094	39.1556	MLL-Stranded_total_RNA_PE100bp	German MLL	NA	Not available*
MLL_23111	T-ALL	notETP	NCOA6-SPDEF	60.879	23.9626	MLL-Stranded_total_RNA_PE100bp	German MLL	NA	Not available*
MLL_23112	T-ALL	notETP	TCF7-VDAC1	57.7269	47.2195	MLL-Stranded_total_RNA_PE100bp	German MLL	NA	Not available*
MLL_23190	T-ALL	ETP	NoFusion	23.056	56.3856	MLL-Stranded_total_RNA_PE100bp	German MLL	NA	Not available*
MLL_23199	T-ALL	notETP	NoFusion	35.7141	53.3456	MLL-Stranded_total_RNA_PE100bp	German MLL	NA	Not available*
MLL_23211	T-ALL	notETP	NoFusion	63.988	18.9505	MLL-Stranded_total_RNA_PE100bp	German MLL	NA	Not available*
MLL_29452	T-ALL	notETP	NoFusion	41.8741	15.0244	MLL-Stranded_total_RNA_PE100bp	German MLL	NA	Not available*
MLL_30391	T-ALL	ETP	GPBP1-RPS23	28.1585	51.6868	MLL-Stranded_total_RNA_PE100bp	German MLL	NA	Not available*
MLL_30903	T-ALL	notETP	NoFusion	42.6435	39.1358	MLL-Stranded_total_RNA_PE100bp	German MLL	NA	Not available*
MLL_31780	T-ALL	notETP	NUP98-RAP1GDS1	57.8914	42.1055	MLL-Stranded_total_RNA_PE100bp	German MLL	NA	Not available*
MLL_31964	T-ALL	ETP	NKX2-3-TRB	10.7565	49.5125	MLL-Stranded_total_RNA_PE100bp	German MLL	NA	Not available*
MLL_41580	T-ALL	notETP	NoFusion	11.0038	5.96586	MLL-Stranded_total_RNA_PE100bp	German MLL	NA	Not available*
MLL_51521	T-ALL	notETP	SET-NUP214;TRG-MLLT10	42.2452	38.1278	MLL-Stranded_total_RNA_PE100bp	German MLL	NA	Not available*
MLL_52968	T-ALL	notETP	TCRA-TLX1	52.3559	38.0056	MLL-Stranded_total_RNA_PE100bp	German MLL	NA	Not available*
MLL_54448	T-ALL	ETP	STIL-TAL1	54.6884	29.2398	MLL-Stranded_total_RNA_PE100bp	German MLL	NA	Not available*
MLL_54462	T-ALL	notETP	LEF1-TRA;HBS1L-AHI1	62.8765	24.7183	MLL-Stranded_total_RNA_PE100bp	German MLL	NA	Not available*
MLL_54465	T-ALL	notETP	DDX3X-MLLT10	58.7954	41.3767	MLL-Stranded_total_RNA_PE100bp	German MLL	NA	Not available*
MLL_54466	T-ALL	notETP	NoFusion	42.5097	45.5125	MLL-Stranded_total_RNA_PE100bp	German MLL	NA	Not available*
MLL_54966	T-ALL	ETP	NoFusion	17.8087	23.1692	MLL-Stranded_total_RNA_PE100bp	German MLL	NA	Not available*
SJALL068283_D1	T-ALL	ETP	CCDC26-BCL11B	1.30611	59.5904	MLL-Stranded_total_RNA_PE100bp	German MLL	NA	Not available*
MLL_00207	MPAL	MPAL(T/M)	PICALM-MLLT10	19.4005	54.4482	MLL-Stranded_total_RNA_PE100bp	German MLL	NA	Not available*
SJMPAL068274_D1	MPAL	MPAL(T/M)	BCL11B enh amp	1.38513	65.6413	MLL-Stranded_total_RNA_PE100bp	German MLL	NA	Not available*
SJMPAL068275_D1	MPAL	MPAL(T/M)	CCDC26-BCL11B	3.59538	61.9663	MLL-Stranded_total_RNA_PE100bp	German MLL	NA	Not available*
MLL_11985	MPAL	MPAL(T/M)	NoFusion	8.44978	33.8963	MLL-Stranded_total_RNA_PE100bp	German MLL	NA	Not available*
MLL_11986	MPAL	MPAL(T/M)	NoFusion	16.8854	31.4633	MLL-Stranded_total_RNA_PE100bp	German MLL	NA	Not available*
MLL_11987	MPAL	MPAL(T/M)	NoFusion	19.9753	53.2081	MLL-Stranded_total_RNA_PE100bp	German MLL	NA	Not available*
SJMPAL068276_D1	MPAL	MPAL(T/M)	CCDC26-BCL11B	1.45247	66.2546	MLL-Stranded_total_RNA_PE100bp	German MLL	NA	Not available*
MLL_11989	MPAL	MPAL(T/M)	NoFusion	19.6099	53.6356	MLL-Stranded_total_RNA_PE100bp	German MLL	NA	Not available*
MLL_11991	MPAL	MPAL(T/M)	NoFusion	14.5026	18.4787	MLL-Stranded_total_RNA_PE100bp	German MLL	NA	Not available*
MLL_12406	MPAL	MPAL(B/M)	NoFusion	16.6041	30.4137	MLL-Stranded_total_RNA_PE100bp	German MLL	NA	Not available*
MLL_12435	MPAL	MPAL(B/M)	NoFusion	-4.4551	-25.6758	MLL-Stranded_total_RNA_PE100bp	German MLL	NA	Not available*
MLL_12436	MPAL	MPAL(B/M?)	NoFusion	-20.0511	38.6143	MLL-Stranded_total_RNA_PE100bp	German MLL	NA	Not available*
MLL_12437	MPAL	MPAL(B/M?)	NoFusion	11.9972	39.0596	MLL-Stranded_total_RNA_PE100bp	German MLL	NA	Not available*
MLL_12442	MPAL	MPAL(Ph)	ABL1-BCR	-19.3324	-75.826	MLL-Stranded_total_RNA_PE100bp	German MLL	NA	Not available*
MLL_12460	MPAL	MPAL(B/M)	NoFusion	-15.3392	-76.444	MLL-Stranded_total_RNA_PE100bp	German MLL	NA	Not available*
MLL_12465	MPAL	MPAL(B/M)	NoFusion	-1.89483	-24.5765	MLL-Stranded_total_RNA_PE100bp	German MLL	NA	Not available*
MLL_12591	MPAL	MPAL(B/M?)	RUNX1-RUNX1T1	-20.1882	44.6372	MLL-Stranded_total_RNA_PE100bp	German MLL	NA	Not available*
SJMPAL068278_D1	MPAL	MPAL(T/M)	CCDC26-BCL11B	2.67547	60.5041	MLL-Stranded_total_RNA_PE100bp	German MLL	NA	Not available*
MLL_20787	MPAL	MPAL(Ph)	ABL1-BCR	-35.5384	-37.4393	MLL-Stranded_total_RNA_PE100bp	German MLL	NA	Not available*
MLL_21268	MPAL	MPAL(B/M)	STIL-TAL1	0.508956	-10.0323	MLL-Stranded_total_RNA_PE100bp	German MLL	NA	Not available*
MLL_21959	MPAL	MPAL(B/M)	NoFusion	-50.8283	-84.2426	MLL-Stranded_total_RNA_PE100bp	German MLL	NA	Not available*
MLL_22500	MPAL	MPAL(B/M)	NoFusion	-52.5674	-83.7824	MLL-Stranded_total_RNA_PE100bp	German MLL	NA	Not available*
MLL_22503	MPAL	MPAL(B/M)	NoFusion	-19.1173	-77.0968	MLL-Stranded_total_RNA_PE100bp	German MLL	NA	Not available*
MLL_22505	MPAL	MPAL(B/M)	NoFusion	-0.23906	-25.3511	MLL-Stranded_total_RNA_PE100bp	German MLL	NA	Not available*
MLL_22606	MPAL	MPAL(B/M)	NoFusion	-57.4461	-79.2179	MLL-Stranded_total_RNA_PE100bp	German MLL	NA	Not available*
SJMPAL068282_D1	MPAL	MPAL(T/M)	BCL11B-ARID1B	3.33031	61.2511	MLL-Stranded_total_RNA_PE100bp	German MLL	NA	Not available*
MLL_46386	MPAL	MPAL(T/M)	NoFusion	23.1935	56.2531	MLL-Stranded_total_RNA_PE100bp	German MLL	NA	Not available*
SJMPAL068284_D1	MPAL	MPAL(T/M)	CCDC26-BCL11B	2.21147	65.0206	MLL-Stranded_total_RNA_PE100bp	German MLL	NA	Not available*
SJMPAL068285_D1	MPAL	MPAL(T/M)	BCL11B-ARID1B	1.92786	59.489	MLL-Stranded_total_RNA_PE100bp	German MLL	NA	Not available*
MLL_57544	MPAL	MPAL(T/M)	NoFusion	23.919	30.0696	MLL-Stranded_total_RNA_PE100bp	German MLL	NA	Not available*
MLL_57990	MPAL	MPAL(B/M)	NoFusion	-51.2973	-84.1993	MLL-Stranded_total_RNA_PE100bp	German MLL	NA	Not available*
MLL_58254	MPAL	MPAL(B/M)	NoFusion	-3.37345	-26.3577	MLL-Stranded_total_RNA_PE100bp	German MLL	NA	Not available*
SJMPAL068286_D1	MPAL	MPAL(T/M)	CCDC26-BCL11B	1.00361	64.5899	MLL-Stranded_total_RNA_PE100bp	German MLL	NA	Not available*
MLL_58322	MPAL	MPAL(B/M)	NoFusion	-3.39292	-26.082	MLL-Stranded_total_RNA_PE100bp	German MLL	NA	Not available*
TALL001	T-ALL	notETP	NoFusion	48.4382	47.8685	TALL-JP-Stranded_total_RNA_PE100bp	Seki et al. Nature Genetics 2017	28671687	JGAS00000000090
TALL002	T-ALL	notETP	NoFusion(TAL1-ins)	61.8672	27.8203	TALL-JP-Stranded_total_RNA_PE100bp	Seki et al. Nature Genetics 2017	28671687	JGAS00000000090
TALL006	T-ALL	notETP	NoFusion	50.9489	45.6838	TALL-JP-Stranded_total_RNA_PE100bp	Seki et al. Nature Genetics 2017	28671687	JGAS00000000090
TALL007	T-ALL	notETP	STIL-TAL1	61.0122	17.3123	TALL-JP-Stranded_total_RNA_PE100bp	Seki et al. Nature Genetics 2017	28671687	JGAS00000000090
TALL008	T-ALL	notETP	NoFusion	48.7617	31.5186	TALL-JP-Stranded_total_RNA_PE100bp	Seki et al. Nature Genetics 2017	28671687	JGAS00000000090
TALL009	T-ALL	notETP	NoFusion	48.9285	47.5083	TALL-JP-Stranded_total_RNA_PE100bp	Seki et al. Nature Genetics 2017	28671687	JGAS00000000090
TALL010	T-ALL	notETP	STIL-TAL1;HDAC4-GHR	62.6251	27.611	TALL-JP-Stranded_total_RNA_PE100bp	Seki et al. Nature Genetics 2017	28671687	JGAS00000000090
TALL013	T-ALL	notETP	NoFusion	60.8096	28.4423	TALL-JP-Stranded_total_RNA_PE100bp	Seki et al. Nature Genetics 2017	28671687	JGAS00000000090
TALL014	T-ALL	notETP	NoFusion	-0.949487	7.48854	TALL-JP-Stranded_total_RNA_PE100bp	Seki et al. Nature Genetics 2017	28671687	JGAS00000000090
TALL015	T-ALL	notETP	NoFusion	62.4399	28.3413	TALL-JP-Stranded_total_RNA_PE100bp	Seki et al. Nature Genetics 2017	28671687	JGAS00000000090
TALL017	T-ALL	notETP	NoFusion	59.1028	34.207	TALL-JP-Stranded_total_RNA_PE100bp	Seki et al. Nature Genetics 2017	28671687	JGAS00000000090
TALL019	T-ALL	notETP	NoFusion	20.1694	60.5241	TALL-JP-Stranded_total_RNA_PE100bp	Seki et al. Nature Genetics 2017	28671687	JGAS00000000090
TALL020	T-ALL	notETP	STIL-TAL1	58.9863	18.8524	TALL-JP-Stranded_total_RNA_PE100bp	Seki et al. Nature Genetics 2017	28671687	JGAS00000000090
TALL025	T-ALL	notETP	NoFusion	47.015	47.8534	TALL-JP-Stranded_total_RNA_PE100bp	Seki et al. Nature Genetics 2017	28671687	JGAS00000000090
TALL032	T-ALL	notETP	NoFusion	41.9106	50.0415	TALL-JP-Stranded_total_RNA_PE100bp	Seki et al. Nature Genetics 2017	28671687	JGAS00000000090
TALL033	T-ALL	notETP	NUP214-ABL1	43.9879	49.1768	TALL-JP-Stranded_total_RNA_PE100bp	Seki et al. Nature Genetics 2017	28671687	JGAS00000000090
TALL035	T-ALL	notETP	NoFusion	19.9207	59.8669	TALL-JP-Stranded_total_RNA_PE100bp	Seki et al. Nature Genetics 2017	28671687	JGAS00000000090
TALL036	T-ALL	notETP	NoFusion	56.9223	26.1075	TALL-JP-Stranded_total_RNA_PE100bp	Seki et al. Nature Genetics 2017	28671687	JGAS00000000090
TALL037	T-ALL	notETP	NoFusion	59.6063	26.1537	TALL-JP-Stranded_total_RNA_PE100bp	Seki et al. Nature Genetics 2017	28671687	JGAS00000000090
TALL038	T-ALL	notETP	NoFusion	58.0482	26.6225	TALL-JP-Stranded_total_RNA_PE100bp	Seki et al. Nature Genetics 2017	28671687	JGAS00000000090
TALL040	T-ALL	notETP	NoFusion	44.1857	50.2426	TALL-JP-Stranded_total_RNA_PE100bp	Seki et al. Nature Genetics 2017	28671687	JGAS00000000090
TALL042	T-ALL	notETP	NoFusion	30.7649	52.3263	TALL-JP-Stranded_total_RNA_PE100bp	Seki et al. Nature Genetics 2017	28671687	JGAS00000000090
TALL045	T-ALL	notETP	NoFusion	57.6845	15.4891	TALL-JP-Stranded_total_RNA_PE100bp	Seki et al. Nature Genetics 2017	28671687	JGAS00000000090
TALL046	T-ALL	notETP	STIL-TAL1	57.6555	16.286	TALL-JP-Stranded_total_RNA_PE100bp	Seki et al. Nature Genetics 2017	28671687	JGAS00000000090
TALL047	T-ALL	notETP	NoFusion	51.9336	47.8524	TALL-JP-Stranded_total_RNA_PE100bp	Seki et al. Nature Genetics 2017	28671687	JGAS00000000090
TALL048	T-ALL	notETP	STIL-TAL1	59.2669	16.4112	TALL-JP-Stranded_total_RNA_PE100bp	Seki et al. Nature Genetics 2017	28671687	JGAS00000000090
TALL049	T-ALL	notETP	NoFusion	50.264	40.7387	TALL-JP-Stranded_total_RNA_PE100bp	Seki et al. Nature Genetics 2017	28671687	JGAS00000000090
TALL050	T-ALL	notETP	NoFusion(TAL1-ins)	57.9749	21.1017	TALL-JP-Stranded_total_RNA_PE100bp	Seki et al. Nature Genetics 2017	28671687	JGAS00000000090
TALL051	T-ALL	notETP	CBFA2T3-ACSF3	60.1422	15.6183	TALL-JP-Stranded_total_RNA_PE100bp	Seki et al. Nature Genetics 2017	28671687	JGAS00000000090
TALL053	T-ALL	notETP	STIL-TAL1	59.8183	18.0091	TALL-JP-Stranded_total_RNA_PE100bp	Seki et al. Nature Genetics 2017	28671687	JGAS00000000090
TALL056	T-ALL	notETP	NoFusion(TAL1-ins)	53.5678	26.638	TALL-JP-Stranded_total_RNA_PE100bp	Seki et al. Nature Genetics 2017	28671687	JGAS00000000090
TALL057	T-ALL	notETP	STIL-TAL1	56.8308	14.4817	TALL-JP-Stranded_total_RNA_PE100bp	Seki et al. Nature Genetics 2017	28671687	JGAS00000000090
TALL062	T-ALL	notETP	NoFusion(TAL1-ins)	54.6421	27.4043	TALL-JP-Stranded_total_RNA_PE100bp	Seki et al. Nature Genetics 2017	28671687	JGAS00000000090
TALL066	T-ALL	notETP	TLX1NB-TCRD	53.3317	47.3394	TALL-JP-Stranded_total_RNA_PE100bp	Seki et al. Nature Genetics 2017	28671687	JGAS00000000090
TALL067	T-ALL	notETP	NUP214-ABL1;NF1-PSMD11	43.1001	50.1002	TALL-JP-Stranded_total_RNA_PE100bp	Seki et al. Nature Genetics 2017	28671687	JGAS00000000090
TALL068	T-ALL	notETP	NoFusion	45.9179	48.726	TALL-JP-Stranded_total_RNA_PE100bp	Seki et al. Nature Genetics 2017	28671687	JGAS00000000090
TALL071	T-ALL	notETP	SEC16A-NOTCH1	61.4009	18.2848	TALL-JP-Stranded_total_RNA_PE100bp	Seki et al. Nature Genetics 2017	28671687	JGAS00000000090
TALL075	T-ALL	notETP	NoFusion	54.3347	44.4069	TALL-JP-Stranded_total_RNA_PE100bp	Seki et al. Nature Genetics 2017	28671687	JGAS00000000090
TALL076	T-ALL	notETP	NoFusion	30.8046	55.7945	TALL-JP-Stranded_total_RNA_PE100bp	Seki et al. Nature Genetics 2017	28671687	JGAS00000000090
TALL078	T-ALL	notETP	NoFusion	6.19958	58.4232	TALL-JP-Stranded_total_RNA_PE100bp	Seki et al. Nature Genetics 2017	28671687	JGAS00000000090
TALL079	T-ALL	notETP	RUNX1-EVX1	19.2661	57.371	TALL-JP-Stranded_total_RNA_PE100bp	Seki et al. Nature Genetics 2017	28671687	JGAS00000000090
TALL_VC003	T-ALL	notETP	NoFusion	57.2167	24.6903	TALL-JP-Stranded_total_RNA_PE100bp	Seki et al. Nature Genetics 2017	28671687	JGAS00000000090
TALL_VC014	T-ALL	notETP	NoFusion	45.0027	51.9744	TALL-JP-Stranded_total_RNA_PE100bp	Seki et al. Nature Genetics 2017	28671687	JGAS00000000090
TALL_VC020	T-ALL	notETP	STIL-TAL1	54.2238	18.2905	TALL-JP-Stranded_total_RNA_PE100bp	Seki et al. Nature Genetics 2017	28671687	JGAS00000000090
TALL_VC023	T-ALL	notETP	STIL-TAL1;SEC16A-NOTCH1	58.509	17.6547	TALL-JP-Stranded_total_RNA_PE100bp	Seki et al. Nature Genetics 2017	28671687	JGAS00000000090
TALL_VC050	T-ALL	notETP	NoFusion	28.944	50.9899	TALL-JP-Stranded_total_RNA_PE100bp	Seki et al. Nature Genetics 2017	28671687	JGAS00000000090
TALL_VC062	T-ALL	notETP	NoFusion	55.6901	23.2976	TALL-JP-Stranded_total_RNA_PE100bp	Seki et al. Nature Genetics 2017	28671687	JGAS00000000090
TALL_VC068	T-ALL	notETP	CREBRF-AK7	47.1838	50.2726	TALL-JP-Stranded_total_RNA_PE100bp	Seki et al. Nature Genetics 2017	28671687	JGAS00000000090
TALL_VC069	T-ALL	notETP	NoFusion	51.5572	45.6764	TALL-JP-Stranded_total_RNA_PE100bp	Seki et al. Nature Genetics 2017	28671687	JGAS00000000090
TALL_VC070	T-ALL	notETP	NoFusion	60.4852	20.2491	TALL-JP-Stranded_total_RNA_PE100bp	Seki et al. Nature Genetics 2017	28671687	JGAS00000000090
TALL_VC075	T-ALL	notETP	STIL-TAL1	54.5242	25.188	TALL-JP-Stranded_total_RNA_PE100bp	Seki et al. Nature Genetics 2017	28671687	JGAS00000000090
TALL_VC086	T-ALL	notETP	NoFusion	59.6479	20.8327	TALL-JP-Stranded_total_RNA_PE100bp	Seki et al. Nature Genetics 2017	28671687	JGAS00000000090
TALL_VC088	T-ALL	notETP	NoFusion(TAL1-ins)	54.3372	24.3721	TALL-JP-Stranded_total_RNA_PE100bp	Seki et al. Nature Genetics 2017	28671687	JGAS00000000090
TALL_VC091	T-ALL	notETP	STIL-TAL1	60.7456	19.8988	TALL-JP-Stranded_total_RNA_PE100bp	Seki et al. Nature Genetics 2017	28671687	JGAS00000000090
TALL_VC092	T-ALL	notETP	PICALM-MLLT10	21.4433	59.2153	TALL-JP-Stranded_total_RNA_PE100bp	Seki et al. Nature Genetics 2017	28671687	JGAS00000000090
TALL_VC093	T-ALL	notETP	NoFusion	45.1113	50.3318	TALL-JP-Stranded_total_RNA_PE100bp	Seki et al. Nature Genetics 2017	28671687	JGAS00000000090
TALL_VC094	T-ALL	notETP	STIL-TAL1	59.9843	27.1315	TALL-JP-Stranded_total_RNA_PE100bp	Seki et al. Nature Genetics 2017	28671687	JGAS00000000090
TALL_VC096	T-ALL	notETP	CTCF-SLC7A6	45.8851	49.5744	TALL-JP-Stranded_total_RNA_PE100bp	Seki et al. Nature Genetics 2017	28671687	JGAS00000000090
TALL_VC099	T-ALL	notETP	NoFusion	57.1988	35.1686	TALL-JP-Stranded_total_RNA_PE100bp	Seki et al. Nature Genetics 2017	28671687	JGAS00000000090
TALL_VC103	T-ALL	notETP	NoFusion	42.908	48.443	TALL-JP-Stranded_total_RNA_PE100bp	Seki et al. Nature Genetics 2017	28671687	JGAS00000000090
TALL_VC104	T-ALL	notETP	STIL-TAL1	58.5601	14.0918	TALL-JP-Stranded_total_RNA_PE100bp	Seki et al. Nature Genetics 2017	28671687	JGAS00000000090
TALL004	T-ALL	notETP	FGFR1OP-FGFR1	6.147	14.1482	TALL-JP-Stranded_total_RNA_PE100bp	Seki et al. Nature Genetics 2017	28671687	JGAS00000000090
TALL_VC087	T-ALL	notETP	NKX2-1-AS1-TCRD	16.7908	6.92858	TALL-JP-Stranded_total_RNA_PE100bp	Seki et al. Nature Genetics 2017	28671687	JGAS00000000090
TALL011	T-ALL	notETP	KMT2A-MLLT1	43.9729	31.7599	TALL-JP-Stranded_total_RNA_PE100bp	Seki et al. Nature Genetics 2017	28671687	JGAS00000000090
TALL055	T-ALL	notETP	KMT2A-MLLT1	45.3876	26.5071	TALL-JP-Stranded_total_RNA_PE100bp	Seki et al. Nature Genetics 2017	28671687	JGAS00000000090
TALL063	T-ALL	notETP	STIL-TAL1	8.25575	17.6934	TALL-JP-Stranded_total_RNA_PE100bp	Seki et al. Nature Genetics 2017	28671687	JGAS00000000090
TALL_VC025	T-ALL	notETP	NoFusion	13.1028	10.7463	TALL-JP-Stranded_total_RNA_PE100bp	Seki et al. Nature Genetics 2017	28671687	JGAS00000000090
TALL_VC058	T-ALL	notETP	KMT2A-MLLT1	40.9424	31.6817	TALL-JP-Stranded_total_RNA_PE100bp	Seki et al. Nature Genetics 2017	28671687	JGAS00000000090
TALL_VC084	T-ALL	notETP	KMT2A-MLLT1	43.2018	31.7119	TALL-JP-Stranded_total_RNA_PE100bp	Seki et al. Nature Genetics 2017	28671687	JGAS00000000090
TALL003	T-ALL	notETP	NoFusion	21.4291	21.6684	TALL-JP-Stranded_total_RNA_PE100bp	Seki et al. Nature Genetics 2017	28671687	JGAS00000000090
TALL023	T-ALL	notETP	STMN1-SPI1	68.1827	2.19795	TALL-JP-Stranded_total_RNA_PE100bp	Seki et al. Nature Genetics 2017	28671687	JGAS00000000090
TALL027	T-ALL	notETP	TCF7-SPI1	67.6109	1.80319	TALL-JP-Stranded_total_RNA_PE100bp	Seki et al. Nature Genetics 2017	28671687	JGAS00000000090
TALL028	T-ALL	notETP	STMN1-SPI1	69.0294	2.42917	TALL-JP-Stranded_total_RNA_PE100bp	Seki et al. Nature Genetics 2017	28671687	JGAS00000000090
TALL041	T-ALL	notETP	TCF7-SPI1	68.7824	0.972099	TALL-JP-Stranded_total_RNA_PE100bp	Seki et al. Nature Genetics 2017	28671687	JGAS00000000090
TALL059	T-ALL	notETP	TCF7-SPI1	67.3005	1.14742	TALL-JP-Stranded_total_RNA_PE100bp	Seki et al. Nature Genetics 2017	28671687	JGAS00000000090
TALL060	T-ALL	notETP	TCF7-SPI1	67.8169	0.9058	TALL-JP-Stranded_total_RNA_PE100bp	Seki et al. Nature Genetics 2017	28671687	JGAS00000000090
TALL081	T-ALL	notETP	NoFusion	24.9571	23.9702	TALL-JP-Stranded_total_RNA_PE100bp	Seki et al. Nature Genetics 2017	28671687	JGAS00000000090
TALL_VC005	T-ALL	notETP	NoFusion	21.4134	21.6316	TALL-JP-Stranded_total_RNA_PE100bp	Seki et al. Nature Genetics 2017	28671687	JGAS00000000090
TALL_VC065	T-ALL	notETP	KMT2A-MLLT6	38.4516	31.4038	TALL-JP-Stranded_total_RNA_PE100bp	Seki et al. Nature Genetics 2017	28671687	JGAS00000000090
TALL_VC090	T-ALL	notETP	KMT2A-TNRC18	36.5316	31.4379	TALL-JP-Stranded_total_RNA_PE100bp	Seki et al. Nature Genetics 2017	28671687	JGAS00000000090
TALL016	T-ALL	notETP	NoFusion	30.1492	46.9265	TALL-JP-Stranded_total_RNA_PE100bp	Seki et al. Nature Genetics 2017	28671687	JGAS00000000090
TALL024	T-ALL	notETP	NoFusion(TAL1-ins)	49.8638	29.5111	TALL-JP-Stranded_total_RNA_PE100bp	Seki et al. Nature Genetics 2017	28671687	JGAS00000000090
TALL054	T-ALL	notETP	NoFusion	56.1446	27.8938	TALL-JP-Stranded_total_RNA_PE100bp	Seki et al. Nature Genetics 2017	28671687	JGAS00000000090
TALL077	T-ALL	notETP	BCL11B-NKX2-5;STIL-TAL1	52.6708	33.4536	TALL-JP-Stranded_total_RNA_PE100bp	Seki et al. Nature Genetics 2017	28671687	JGAS00000000090
TALL_VC076	T-ALL	notETP	STIL-TAL1	54.804	18.3073	TALL-JP-Stranded_total_RNA_PE100bp	Seki et al. Nature Genetics 2017	28671687	JGAS00000000090
TALL044	T-ALL	notETP	PICALM-MLLT10	57.7665	39.9202	TALL-JP-Stranded_total_RNA_PE100bp	Seki et al. Nature Genetics 2017	28671687	JGAS00000000090
TALL_VC011	T-ALL	notETP	NIPBL-ETV6	1.59893	7.3843	TALL-JP-Stranded_total_RNA_PE100bp	Seki et al. Nature Genetics 2017	28671687	JGAS00000000090
TALL030	T-ALL	notETP	NoFusion	0.418279	6.9051	TALL-JP-Stranded_total_RNA_PE100bp	Seki et al. Nature Genetics 2017	28671687	JGAS00000000090
TALL039	T-ALL	notETP	NoFusion	9.77834	17.5407	TALL-JP-Stranded_total_RNA_PE100bp	Seki et al. Nature Genetics 2017	28671687	JGAS00000000090
TALL064	T-ALL	notETP	RUNX1-AFF3	1.31893	8.32265	TALL-JP-Stranded_total_RNA_PE100bp	Seki et al. Nature Genetics 2017	28671687	JGAS00000000090
TALL_VC013	T-ALL	notETP	STIL-TAL1	10.0929	16.99	TALL-JP-Stranded_total_RNA_PE100bp	Seki et al. Nature Genetics 2017	28671687	JGAS00000000090
TALL_VC078	T-ALL	notETP	MLLT10-PICALM	26.9556	49.0943	TALL-JP-Stranded_total_RNA_PE100bp	Seki et al. Nature Genetics 2017	28671687	JGAS00000000090
TALL_VC080	T-ALL	notETP	NoFusion	2.41889	4.28127	TALL-JP-Stranded_total_RNA_PE100bp	Seki et al. Nature Genetics 2017	28671687	JGAS00000000090
TALL_VC081	T-ALL	notETP	MLLT10-PICALM	27.1222	48.4096	TALL-JP-Stranded_total_RNA_PE100bp	Seki et al. Nature Genetics 2017	28671687	JGAS00000000090
TALL_VC101	T-ALL	notETP	NoFusion	2.07231	5.8637	TALL-JP-Stranded_total_RNA_PE100bp	Seki et al. Nature Genetics 2017	28671687	JGAS00000000090
TALL061	T-ALL	notETP	NoFusion	3.00064	4.72371	TALL-JP-Stranded_total_RNA_PE100bp	Seki et al. Nature Genetics 2017	28671687	JGAS00000000090
TALL074	T-ALL	notETP	STIL-TAL1	14.5898	8.02013	TALL-JP-Stranded_total_RNA_PE100bp	Seki et al. Nature Genetics 2017	28671687	JGAS00000000090
TALL072	T-ALL	notETP	NoFusion	11.2089	15.978	TALL-JP-Stranded_total_RNA_PE100bp	Seki et al. Nature Genetics 2017	28671687	JGAS00000000090
TALL080	T-ALL	notETP	SFPQ-ZFP36L1	2.84835	3.93498	TALL-JP-Stranded_total_RNA_PE100bp	Seki et al. Nature Genetics 2017	28671687	JGAS00000000090
TALL_VC073	T-ALL	notETP	NoFusion	51.01	23.3804	TALL-JP-Stranded_total_RNA_PE100bp	Seki et al. Nature Genetics 2017	28671687	JGAS00000000090
TALL_VC102	T-ALL	ETP	STIL-TAL1	14.4496	6.90206	TALL-JP-Stranded_total_RNA_PE100bp	Seki et al. Nature Genetics 2017	28671687	JGAS00000000090
TALL_VC059	T-ALL	notETP	NoFusion	16.3975	7.53238	TALL-JP-Stranded_total_RNA_PE100bp	Seki et al. Nature Genetics 2017	28671687	JGAS00000000090
TALL_VC095	T-ALL	notETP	SET-NUP214	44.4316	36.9802	TALL-JP-Stranded_total_RNA_PE100bp	Seki et al. Nature Genetics 2017	28671687	JGAS00000000090
TALL_VC105	T-ALL	notETP	NoFusion	46.1514	26.1867	TALL-JP-Stranded_total_RNA_PE100bp	Seki et al. Nature Genetics 2017	28671687	JGAS00000000090
SJMPAL003414_D2	MPAL	MPAL(T/M)	PCM1-FGFR1	47.63	76.5011	Stranded_total_RNA_PE100bp	Alexander et al. Nature 2018	30209392	phs000464
SJMPAL004013_D1	MPAL	MPAL(B/M)	NoFusion	-71.6973	-73.878	Stranded_total_RNA_PE100bp	Alexander et al. Nature 2018	30209392	phs000464
SJMPAL011912_D1	MPAL	MPAL(T/M)	NoFusion	3.41181	69.199	Stranded_total_RNA_PE100bp	Alexander et al. Nature 2018	30209392	phs000464
SJMPAL011913_D1	MPAL	MPAL(T/M)	BCL11B (Del);FNDC3B-NAALADL2	-0.843437	69.0107	Stranded_total_RNA_PE100bp	Alexander et al. Nature 2018	30209392	phs000464
SJMPAL011914_D1	MPAL	MPAL(T/M)	CDK6-BCL11B	0.435691	68.7679	Stranded_total_RNA_PE100bp	Alexander et al. Nature 2018	30209392	phs000464
SJMPAL011915_D1	MPAL	MPAL(T/M)	ZEB2-BCL11B;RUNX1-CRNDE;ERLIN1-RUNX1	-0.922832	68.201	Stranded_total_RNA_PE100bp	Alexander et al. Nature 2018	30209392	phs000464
SJMPAL012417_D1	MPAL	MPAL(NOS (T/B/M))	DDX3X-MLLT10;CENPE-PPP3CA	24.1934	60.875	Stranded_total_RNA_PE100bp	Alexander et al. Nature 2018	30209392	phs000464
SJMPAL012418_D1	MPAL	MPAL(KMT2A)	KMT2A-TET1;TASP1-PDCD6IP	12.6021	53.403	Stranded_total_RNA_PE100bp	Alexander et al. Nature 2018	30209392	phs000464
SJMPAL012419_D1	MPAL	MPAL(B/M)	NoFusion	-50.2408	-77.2495	Stranded_total_RNA_PE100bp	Alexander et al. Nature 2018	30209392	phs000464
SJMPAL012420_D1	MPAL	MPAL(T/M)	ZEB2-BCL11B	2.51481	68.8029	Stranded_total_RNA_PE100bp	Alexander et al. Nature 2018	30209392	phs000464
SJMPAL012421_DT	MPAL	MPAL(T/M)	BCL11B-ARID1B	2.7333	73.9298	Stranded_total_RNA_PE75bp	Alexander et al. Nature 2018	30209392	phs000464
SJMPAL012422_D1	MPAL	MPAL(ZNF384)	CREBBP-ZNF384	-74.9512	82.3762	Stranded_total_RNA_PE100bp	Alexander et al. Nature 2018	30209392	phs000464
SJMPAL012425_D1	MPAL	MPAL(ZNF384)	EP300-ZNF384	-78.3556	75.2457	Stranded_total_RNA_PE100bp	Alexander et al. Nature 2018	30209392	phs000464
SJMPAL016340_D1	MPAL	MPAL(T/M)	NUP214-ABL1	31.578	63.8326	Stranded_total_RNA_PE100bp	Alexander et al. Nature 2018	30209392	phs000464
SJMPAL016341_DT	MPAL	MPAL(T/M)	BCL11B-ARID1B	3.90777	71.9492	Stranded_total_RNA_PE75bp	Alexander et al. Nature 2018	30209392	phs000464
SJMPAL016342_DT	MPAL	MPAL(T/M)	EWSR1-FEV	13.0872	32.5126	Stranded_total_RNA_PE75bp	Alexander et al. Nature 2018	30209392	phs000464
SJMPAL016343_D1	MPAL	MPAL(T/M)	ETV6-NCOA2	25.5394	63.5889	Stranded_total_RNA_PE100bp	Alexander et al. Nature 2018	30209392	phs000464
SJMPAL016344_D1	MPAL	MPAL(T/M)	NoFusion	48.2473	74.8661	Stranded_total_RNA_PE100bp	Alexander et al. Nature 2018	30209392	phs000464
SJMPAL016447_D1	MPAL	MPAL(T/M)	SET-NUP214	28.7873	65.2332	Stranded_total_RNA_PE100bp	Alexander et al. Nature 2018	30209392	phs000464
SJMPAL016448_D1	MPAL	MPAL(B/M)	IGH-CRLF2	17.1862	-83.9266	Stranded_total_RNA_PE100bp	Alexander et al. Nature 2018	30209392	phs000464
SJMPAL016849_DT	MPAL	MPAL(T/M)	PICALM-MLLT10	28.9177	62.5749	Stranded_total_RNA_PE75bp	Alexander et al. Nature 2018	30209392	phs000464
SJMPAL016852_DT	MPAL	MPAL(B/M)	NoFusion	16.7331	-97.243	Stranded_total_RNA_PE75bp	this study	this study	EGAS00001004810
SJMPAL016854_DT	MPAL	MPAL(B/M)	NoFusion	-55.1825	-95.3021	Stranded_total_RNA_PE75bp	this study	this study	EGAS00001004810
SJMPAL016855_DT	MPAL	MPAL(B/M)	NoFusion	10.8894	30.3296	Stranded_total_RNA_PE75bp	this study	this study	EGAS00001004810
SJMPAL017973_D1	MPAL	MPAL(Ph)	BCR-ABL1	-45.6945	-34.1028	Stranded_total_RNA_PE100bp	Alexander et al. Nature 2018	30209392	phs000464
SJMPAL017975_DT	MPAL	MPAL(B/M)	NoFusion	-16.922	42.7416	Stranded_total_RNA_PE75bp	Alexander et al. Nature 2018	30209392	phs000464
SJMPAL017978_D1	MPAL	MPAL(T/M)	ETV6-NCOA2	25.6492	65.7414	Stranded_total_RNA_PE100bp	Alexander et al. Nature 2018	30209392	phs000464
SJMPAL017981_D1	MPAL	MPAL(KMT2A)	KMT2A-AFF1;AFF1-ARCN1	-50.4718	11.5804	Stranded_total_RNA_PE100bp	Alexander et al. Nature 2018	30209392	phs000464
SJMPAL022667_D1	MPAL	MPAL(T/M)	MNX1-IKZF1;IKZF1-TMBIM7P;EXOC4-PEG10	45.6166	77.2546	Stranded_total_RNA_PE100bp	Alexander et al. Nature 2018	30209392	phs000464
SJMPAL040024_D1	MPAL	MPAL(ZNF384)	TCF3-ZNF384	-69.0694	71.8996	Stranded_total_RNA_PE100bp	Alexander et al. Nature 2018	30209392	phs000464
SJMPAL040025_DT	MPAL	MPAL(ZNF384)	TAF15-ZNF384	-74.9138	77.9905	Stranded_total_RNA_PE75bp	Alexander et al. Nature 2018	30209392	phs000464
SJMPAL040026_D1	MPAL	MPAL(KMT2A)	KMT2A-USP2	-30.5034	21.3915	Stranded_total_RNA_PE100bp	Alexander et al. Nature 2018	30209392	phs000464
SJMPAL040027_D1	MPAL	MPAL(T/M)	NoFusion	23.7041	78.9924	Stranded_total_RNA_PE100bp	Alexander et al. Nature 2018	30209392	phs000464
SJMPAL040030_D1	MPAL	MPAL(B/M)	ERG-HNRNPH1	8.40339	38.361	Stranded_total_RNA_PE100bp	Alexander et al. Nature 2018	30209392	phs000464
SJMPAL040031_D1	MPAL	MPAL(ZNF384)	TCF3-ZNF384	-68.3192	71.7692	Stranded_total_RNA_PE100bp	Alexander et al. Nature 2018	30209392	phs000464
SJMPAL040033_D1	MPAL	MPAL(ZNF384)	EP300-ZNF384	-76.4397	78.5798	Stranded_total_RNA_PE100bp	Alexander et al. Nature 2018	30209392	phs000464
SJMPAL040034_D1	MPAL	MPAL(ZNF384)	TCF3-ZNF384	-70.7428	70.7239	Stranded_total_RNA_PE100bp	Alexander et al. Nature 2018	30209392	phs000464
SJMPAL040035_D1	MPAL	MPAL(KMT2A)	KMT2A-MLLT3	-10.001	25.0779	Stranded_total_RNA_PE100bp	Alexander et al. Nature 2018	30209392	phs000464
SJMPAL040036_D1	MPAL	MPAL(T/M)	NoFusion	-0.177112	31.6306	Stranded_total_RNA_PE100bp	Alexander et al. Nature 2018	30209392	phs000464
SJMPAL040038_DT	MPAL	MPAL(B/M)	NoFusion	5.22631	-72.6998	Stranded_total_RNA_PE75bp	Alexander et al. Nature 2018	30209392	phs000464
SJMPAL040039_D1	MPAL	MPAL(B/M)	CPD-NF1	-43.9187	4.82663	Stranded_total_RNA_PE100bp	Alexander et al. Nature 2018	30209392	phs000464
SJMPAL040459_DT	MPAL	MPAL(T/M)	BCL11B enh amp	2.08369	71.9086	Stranded_total_RNA_PE75bp	Alexander et al. Nature 2018	30209392	phs000464
SJMPAL041117_D1	MPAL	MPAL(B/M)	CNST-SCCPDH	-56.8353	-90.1158	Stranded_total_RNA_PE100bp	Alexander et al. Nature 2018	30209392	phs000464
SJMPAL041118_D1	MPAL	MPAL(ZNF384)	TCF3-ZNF384;PAX5-IGK@	-74.9127	73.0174	Stranded_total_RNA_PE100bp	Alexander et al. Nature 2018	30209392	phs000464
SJMPAL041119_DT	MPAL	MPAL(B/M)	NoFusion	13.0468	32.5053	Stranded_total_RNA_PE75bp	Alexander et al. Nature 2018	30209392	phs000464
SJMPAL041120_D1	MPAL	MPAL(B/M)	SET-NUP214	24.6841	68.451	Stranded_total_RNA_PE100bp	Alexander et al. Nature 2018	30209392	phs000464
SJMPAL041122_D1	MPAL	MPAL(KMT2A)	KMT2A-AFF1;MLLT10-DDX3X	-51.9154	13.2579	Stranded_total_RNA_PE100bp	Alexander et al. Nature 2018	30209392	phs000464
SJMPAL042787_DT	MPAL	MPAL(NOS (T/B))	NoFusion	39.4214	73.8828	Stranded_total_RNA_PE75bp	Alexander et al. Nature 2018	30209392	phs000464
SJMPAL042790_D1	MPAL	MPAL(B/M)	NoFusion	0.377495	29.7512	Stranded_total_RNA_PE100bp	this study	this study	EGAS00001004810
SJMPAL042791_DT	MPAL	MPAL(T/M)	BCL11B enh amp	2.58547	72.7369	Stranded_total_RNA_PE75bp	Alexander et al. Nature 2018	30209392	phs000464
SJMPAL042792_D1	MPAL	MPAL(T/M)	ZEB2-BCL11B;CUX1-MARK3;ANKRD11-CUX1	-0.305948	71.5088	Stranded_total_RNA_PE100bp	Alexander et al. Nature 2018	30209392	phs000464
SJMPAL042793_DT	MPAL	MPAL(T/M)	BCL11B-ARID1B	2.4631	71.598	Stranded_total_RNA_PE75bp	Alexander et al. Nature 2018	30209392	phs000464
SJMPAL042794_DT	MPAL	MPAL(T/M)	BCL11B-ARID1B	1.71101	72.6991	Stranded_total_RNA_PE75bp	Alexander et al. Nature 2018	30209392	phs000464
SJMPAL042796_D1	MPAL	MPAL(T/M)	NoFusion	3.81883	44.3675	Stranded_total_RNA_PE100bp	Alexander et al. Nature 2018	30209392	phs000464
SJMPAL042797_D1	MPAL	MPAL(T/M)	ETV6-MAML3	25.0565	65.4371	Stranded_total_RNA_PE100bp	Alexander et al. Nature 2018	30209392	phs000464
SJMPAL042798_DT	MPAL	MPAL(NOS (T/B/M))	NoFusion	10.6773	33.8373	Stranded_total_RNA_PE75bp	Alexander et al. Nature 2018	30209392	phs000464
SJMPAL042799_DT	MPAL	MPAL(NOS (T/B/M))	NoFusion	52.4287	71.8716	Stranded_total_RNA_PE75bp	Alexander et al. Nature 2018	30209392	phs000464
SJMPAL042801_DT	MPAL	MPAL(T/M)	NoFusion	24.2757	78.2906	Stranded_total_RNA_PE75bp	Alexander et al. Nature 2018	30209392	phs000464
SJMPAL042943_D1	MPAL	MPAL(KMT2A)	KMT2A-AFF1	-42.6834	8.12641	Stranded_total_RNA_PE100bp	Alexander et al. Nature 2018	30209392	phs000464
SJMPAL042946_DT	MPAL	MPAL(NOS (T/B))	CRBN-GABRB2	39.3649	74.2117	Stranded_total_RNA_PE75bp	Alexander et al. Nature 2018	30209392	phs000464
SJMPAL043505_DT	MPAL	MPAL(T/M)	ETV6-FOXO1	23.0713	70.7888	Stranded_total_RNA_PE75bp	Alexander et al. Nature 2018	30209392	phs000464
SJMPAL043508_DT	MPAL	MPAL(ZNF384)	EP300-ZNF384;MADD-SPI1	-79.4066	75.5255	Stranded_total_RNA_PE75bp	Alexander et al. Nature 2018	30209392	phs000464
SJMPAL043509_D1	MPAL	MPAL(T/M)	BCL11B-ARID1B	4.02081	70.6467	Stranded_total_RNA_PE100bp	Alexander et al. Nature 2018	30209392	phs000464
SJMPAL043510_D1	MPAL	MPAL(T/M)	NoFusion	27.6412	74.5997	Stranded_total_RNA_PE100bp	Alexander et al. Nature 2018	30209392	phs000464
SJMPAL043511_DT	MPAL	MPAL(NOS (T/B))	TRIM24-FGFR1	11.1302	29.7984	Stranded_total_RNA_PE75bp	Alexander et al. Nature 2018	30209392	phs000464
SJMPAL043512_DT	MPAL	MPAL(ZNF384)	EP300-ZNF384	-75.4541	76.4887	Stranded_total_RNA_PE75bp	Alexander et al. Nature 2018	30209392	phs000464
SJMPAL043514_D1	MPAL	MPAL(T/M)	ETV6-ARNT	23.9606	72.9496	Stranded_total_RNA_PE100bp	Alexander et al. Nature 2018	30209392	phs000464
SJMPAL043767_DT	MPAL	MPAL(KMT2A)	KMT2A-MLLT10	-29.3257	16.0261	Stranded_total_RNA_PE75bp	Alexander et al. Nature 2018	30209392	phs000464
SJMPAL043768_DT	MPAL	MPAL(AUL)	MNX1-ETV6	22.173	66.8026	Stranded_total_RNA_PE75bp	Alexander et al. Nature 2018	30209392	phs000464
SJMPAL043769_DT	MPAL	MPAL(AUL)	SET-NUP214	22.6049	75.5499	Stranded_total_RNA_PE75bp	Alexander et al. Nature 2018	30209392	phs000464
SJMPAL043770_DT	MPAL	MPAL(AUL)	KMT2A-USP2	-28.5958	23.1762	Stranded_total_RNA_PE75bp	this study	this study	EGAS00001004810
SJMPAL043771_DT	MPAL	MPAL(B/M)	NoFusion	7.93039	35.4917	Stranded_total_RNA_PE75bp	Alexander et al. Nature 2018	30209392	phs000464
SJMPAL043773_DT	MPAL	MPAL(T/M)	CDK6-HOXA11-AS	21.7664	75.0775	Stranded_total_RNA_PE75bp	Alexander et al. Nature 2018	30209392	phs000464
SJMPAL043774_DT	MPAL	MPAL(KMT2A)	KMT2A-MLLT3	-33.122	15.3156	Stranded_total_RNA_PE75bp	Alexander et al. Nature 2018	30209392	phs000464
SJMPAL043775_DT	MPAL	MPAL(Ph)	BCR-ABL1	-49.3612	-33.1402	Stranded_total_RNA_PE75bp	Alexander et al. Nature 2018	30209392	phs000464
SJMPAL044948_D1	MPAL	MPAL(T/M)	LIN28B-AMPH	28.3062	29.3586	Stranded_total_RNA_PE100bp	Alexander et al. Nature 2018	30209392	phs000464
SJMPAL044949_D1	MPAL	MPAL(NOS (T/B))	NoFusion	58.887	80.8668	Stranded_total_RNA_PE100bp	Alexander et al. Nature 2018	30209392	phs000464
SJMPAL044950_D1	MPAL	MPAL(KMT2A)	KMT2A-AFF1	-43.8779	5.94899	Stranded_total_RNA_PE100bp	Alexander et al. Nature 2018	30209392	phs000464
SJMPAL044953_D1	MPAL	MPAL(T/M)	NoFusion	2.04419	70.2664	Stranded_total_RNA_PE100bp	Alexander et al. Nature 2018	30209392	phs000464
SJMPAL046466_D1	MPAL	MPAL(ZNF384)	TCF3-ZNF384	-69.1646	72.5786	Stranded_total_RNA_PE100bp	Alexander et al. Nature 2018	30209392	phs000464
SJMPAL046467_D1	MPAL	MPAL(ZNF384)	TCF3-ZNF384	-72.7219	77.5544	Stranded_total_RNA_PE100bp	Alexander et al. Nature 2018	30209392	phs000464
SJMPAL046469_D1	MPAL	MPAL(AUL)	EBF1-PDGFRB;ATP13A3-RUNX1	-51.3162	-35.9621	Stranded_total_RNA_PE100bp	Alexander et al. Nature 2018	30209392	phs000464
SJMPAL046472_D1	MPAL	MPAL(ZNF384)	TCF3-ZNF384	-70.536	71.4859	Stranded_total_RNA_PE100bp	Alexander et al. Nature 2018	30209392	phs000464
SJAML003320_D2	AML	AML	KMT2A-MLLT1;TASP1-PDCD6IP	-6.4563	28.9398	Stranded_total_RNA_PE100bp	NA	NA	phs000464
SJAML003322_D2	AML	AML	KMT2A-MLLT10;FDX1-KMT2A;SNRK-CACNA2D3	-7.11209	28.4072	Stranded_total_RNA_PE100bp	NA	NA	phs000464
SJAML007112_D2	AML	AML	RUNX1-RUNX1T1	-17.3064	43.8717	Stranded_total_RNA_PE100bp	NA	NA	phs000464
SJAML016570_D2	AML	AML	NUP98-KDM5A	-2.97528	30.3874	Stranded_total_RNA_PE100bp	NA	NA	phs000464
SJAML040268_D3	AML	AML	NUP98-NSD1	5.62762	42.2538	Stranded_total_RNA_PE100bp	NA	NA	phs000464
SJAML045734_D1	AML	AML	KMT2A-MLLT1;TASP1-PDCD6IP	-3.77281	29.5618	Stranded_total_RNA_PE100bp	NA	NA	phs000464
SJAML045735_D1	AML	AML	CBFB-MYH11	-5.06076	44.6693	Stranded_total_RNA_PE100bp	NA	NA	phs000464
SJAML045736_D1	AML	AML	KMT2A-MLLT3	-4.92467	29.268	Stranded_total_RNA_PE100bp	NA	NA	phs000464
SJAML045737_D1	AML	AML	RUNX1-BCL11B	1.37391	68.8103	Stranded_total_RNA_PE100bp	NA	NA	phs000464
SJAML045738_D1	AML	AML	NoFusion	4.84519	44.3086	Stranded_total_RNA_PE100bp	NA	NA	phs000464
SJAML045739_D1	AML	AML	NoFusion	3.57583	43.8767	Stranded_total_RNA_PE100bp	NA	NA	phs000464
SJAML045740_D1	AML	AML	RUNX1-RUNX1T1	-17.3499	44.7943	Stranded_total_RNA_PE100bp	NA	NA	phs000464
SJAML045741_D1	AML	AML	RUNX1-RUNX1T1	-15.8928	44.9271	Stranded_total_RNA_PE100bp	NA	NA	phs000464
SJAML045742_D1	AML	AML	KMT2A-MLLT3;TASP1-PDCD6IP	2.75714	39.4515	Stranded_total_RNA_PE100bp	NA	NA	phs000464
SJBALL021434_D1	T-ALL	NA	NoFusion	7.99971	31.383	Unstranded_mRNA_PE100bp	Gu et al. Nature Genetics 2019	30643249	EGAS00001003266
SJALL016820_D1	T-ALL	NA	STIL-TAL1	87.949	52.7497	Stranded_total_RNA_PE100bp	this study	this study	EGAS00001004810
SJALL016829_D1	T-ALL	NA	NoFusion	4.84788	73.3114	Stranded_total_RNA_PE100bp	this study	this study	EGAS00001004810
[truncated: 580 more rows]

## Sheet: ST2.NonB cohort
Sample	Library	Fusion	Disease1	Disease2	Subtype	ETP	FLT3	X-tSNE	Y-tSNE
SJMLL001_D	Stranded_total_RNA_PE100bp	KMT2A-MLLT3;DEXI-TASP1	T-ALL	T-ALL	KMT2A	NA	no-ITD	-5.01276	65.7686
SJMLL014_D	Stranded_total_RNA_PE100bp	KMT2A-MLLT3;DEXI-TASP1	T-ALL	T-ALL	KMT2A	NA	no-ITD	-64.1824	29.685
SJMLL030007_D1	Stranded_total_RNA_PE100bp	DEXI-TASP1(KMT2A fusion missing)	T-ALL	T-ALL	KMT2A	NA	ITD	-37.3543	56.8383
SJMLL002_D	Stranded_total_RNA_PE100bp	KMT2A-MLLT1;DEXI-TASP1	T-ALL	T-ALL	KMT2A	NA	no-ITD	22.5126	-15.8428
SJTALL077_D	Stranded_total_RNA_PE100bp	NoFusion(STIL-TAL1 from CPML sample)	T-ALL	T-ALL	TAL1	notETP	no-ITD	-14.5039	-78.0459
SJTALL030_D	Stranded_total_RNA_PE100bp	NoFusion	T-ALL	T-ALL	NKX2_1	notETP	no-ITD	49.536	-63.5728
SJMLL019_D	Stranded_total_RNA_PE100bp	KMT2A-MLLT3;DEXI-TASP1	T-ALL	T-ALL	KMT2A	NA	no-ITD	-75.8389	19.1902
SJTALL030551_D1	Stranded_total_RNA_PE125bp	STIL-TAL1	T-ALL	T-ALL	TAL1	NA	no-ITD	-28.4036	-105.651
SJTALL030064_D1	Stranded_total_RNA_PE125bp	STIL-TAL1	T-ALL	T-ALL	TAL1	NA	no-ITD	28.8074	-87.0554
SJTALL030071_D1	Stranded_total_RNA_PE125bp	NoFusion	T-ALL	T-ALL	T-other	NA	no-ITD	96.4474	-7.66861
SJTALL030125_D1	Stranded_total_RNA_PE125bp	NoFusion	T-ALL	T-ALL	T-other	NA	no-ITD	31.142	-85.631
SJTALL030124_D1	Stranded_total_RNA_PE125bp	NoFusion	T-ALL	T-ALL	T-other	NA	no-ITD	2.4691	-54.5953
SJTALL030134_D1	Stranded_total_RNA_PE125bp	LMO2-TRA	T-ALL	T-ALL	LMO1/2	NA	no-ITD	28.5095	-85.4745
SJTALL030175_D1	Stranded_total_RNA_PE125bp	SYNRG-TTBK2	T-ALL	T-ALL(GD)	TLX3	NA	no-ITD	91.9287	19.5806
SJTALL030189_D1	Stranded_total_RNA_PE125bp	PDCD6IP-TASP1;DEXI-TASP1	T-ALL	T-ALL	T-other	NA	no-ITD	10.523	-10.5132
SJTALL030212_D1	Stranded_total_RNA_PE125bp	KMT2A-MLLT10;DEXI-TASP1;PDCD6IP-TASP1	T-ALL	T-ALL(GD)	KMT2A	NA	no-ITD	20.2408	13.6341
SJTALL030213_D1	Stranded_total_RNA_PE125bp	NoFusion	T-ALL	T-ALL	T-other	NA	no-ITD	25.9862	-88.7808
SJTALL030263_D1	Stranded_total_RNA_PE125bp	TCF7-SPI1;WRN-TEX15	T-ALL	T-ALL	SPI1	NA	no-ITD	-63.5067	121.277
SJTALL030249_D1	Stranded_total_RNA_PE125bp	SFPQ-ZFP36L2	T-ALL	T-ALL	T-other	NA	no-ITD	-4.00617	-4.00399
SJTALL030338_D1	Stranded_total_RNA_PE125bp	KMT2A-AFDN;PDCD6IP-TASP1	T-ALL	T-ALL(GD)	KMT2A	NA	no-ITD	14.8764	-15.3338
SJTALL030373_D1	Stranded_total_RNA_PE125bp	STIL-TAL1	T-ALL	T-ALL	TAL1	NA	no-ITD	-1.99077	-43.371
SJTALL030376_D1	Stranded_total_RNA_PE125bp	NoFusion	T-ALL	T-ALL	T-other	ETP	no-ITD	-17.4305	-1.09586
SJTALL030390_D1	Stranded_total_RNA_PE125bp	KMT2A-AFDN;TASP1-PDCD6IP;DEXI-TASP1	T-ALL	T-ALL	KMT2A	NA	no-ITD	10.4613	-8.81195
SJTALL030442_D1	Stranded_total_RNA_PE125bp	NoFusion	T-ALL	T-ALL	T-other	NA	no-ITD	42.6846	-72.2728
SJTALL030493_D1	Stranded_total_RNA_PE125bp	NoFusion	T-ALL	T-ALL(GD)	TLX3	NA	no-ITD	90.758	20.7152
SJTALL030494_D1	Stranded_total_RNA_PE125bp	NoFusion	T-ALL	T-ALL	T-other	NA	no-ITD	-4.741	-78.0606
SJTALL030522_D1	Stranded_total_RNA_PE125bp	NoFusion	T-ALL	T-ALL	T-other	NA	no-ITD	-24.1978	-29.2696
SJTALL030527_D1	Stranded_total_RNA_PE125bp	NoFusion	T-ALL	T-ALL	T-other	NA	no-ITD	42.8959	-56.004
SJTALL030598_D1	Stranded_total_RNA_PE125bp	NoFusion	T-ALL	T-ALL	T-other	NA	no-ITD	-23.6876	-26.3798
SJTALL030640_D1	Stranded_total_RNA_PE125bp	NoFusion	T-ALL	T-ALL	T-other	NA	no-ITD	-30.4097	-110.642
SJTALL030684_D1	Stranded_total_RNA_PE125bp	NoFusion	T-ALL	T-ALL	NKX2_1	NA	no-ITD	44.7848	-69.9537
SJTALL030761_D1	Stranded_total_RNA_PE125bp	NUP214-ABL1;AP1B1-TTC28	T-ALL	T-ALL	TLX1	NA	no-ITD	97.4526	-10.0203
SJTALL030880_D1	Stranded_total_RNA_PE125bp	PICALM-MLLT10	T-ALL	T-ALL(GD)	PICALM-MLLT10	NA	no-ITD	38.315	5.89133
SJTALL030907_D1	Stranded_total_RNA_PE125bp	PICALM-MLLT10	T-ALL	T-ALL	PICALM-MLLT10	NA	no-ITD	36.4591	15.2684
SJTALL030916_D1	Stranded_total_RNA_PE125bp	PNISR-KHDRBS2	T-ALL	T-ALL	TLX3	NA	no-ITD	93.7114	19.1402
SJTALL030933_D1	Stranded_total_RNA_PE125bp	STIL-TAL1;ETS1-IKZF1;TBL1XR1-JAK2	T-ALL	T-ALL	TAL1	NA	no-ITD	25.1947	-94.0854
SJTALL030963_D1	Stranded_total_RNA_PE125bp	NoFusion	T-ALL	T-ALL	T-other	NA	no-ITD	27.0638	-90.6786
SJTALL031014_D1	Stranded_total_RNA_PE125bp	NoFusion	T-ALL	T-ALL	T-other	ETP	no-ITD	12.291	70.301
SJTALL031015_D1	Stranded_total_RNA_PE125bp	STAG2(utr5)-LMO2(utr5+>62Kb)	T-ALL	T-ALL(GD)	nonTCR-LMO2	NA	no-ITD	25.2849	-41.4098
SJTALL031107_D1	Stranded_total_RNA_PE125bp	NoFusion	T-ALL	T-ALL	T-other	NA	no-ITD	36.2689	34.2035
SJTALL031201_D1	Stranded_total_RNA_PE125bp	TCF7-SPI1	T-ALL	T-ALL	SPI1	NA	no-ITD	-63.2063	119.958
SJTALL031213_D1	Stranded_total_RNA_PE125bp	STAG2(utr5)-LMO2(utr5+>62Kb)	T-ALL	T-ALL	nonTCR-LMO2	NA	no-ITD	24.0338	-40.7851
SJTALL031265_D1	Stranded_total_RNA_PE125bp	STIL-TAL1	T-ALL	T-ALL	TAL1	NA	no-ITD	-11.4092	-70.2447
SJAML001417_D1	Stranded_total_RNA_PE100bp	NPM1-CCDC28A	AML	AML	AML-other	AML	ITD	-36.1793	43.0486
SJAML030004_D1	Stranded_total_RNA_PE100bp	CREBBP-KAT6A	AML	AML	AML-other	AML	no-ITD	-69.9761	18.3227
SJAML030006_D1	Stranded_total_RNA_PE100bp	DEK-NUP214	AML	AML	AML-other	AML	ITD	-35.6121	57.2479
SJAML030024_D1	Stranded_total_RNA_PE100bp	NoFusion	AML	AML	AML-other	AML	no-ITD	-34.1976	62.9514
SJAML030025_D1	Stranded_total_RNA_PE100bp	NoFusion	AML	AML	AML-other	AML	no-ITD	9.24764	75.1401
SJAML030069_D1	Stranded_total_RNA_PE125bp	KMT2A-AFDN	AML	AML	KMT2A	AML	no-ITD	-37.9764	20.5069
SJAML030077_D1	Stranded_total_RNA_PE125bp	NoFusion	AML	AML	AML-other	AML	no-ITD	-8.86242	-7.5057
SJAML030079_D1	Stranded_total_RNA_PE125bp	KMT2A-MLLT3	AML	AML	KMT2A	AML	no-ITD	-37.2459	-19.0752
SJAML030085_D1	Stranded_total_RNA_PE125bp	KMT2A-MLLT6	AML	AML	KMT2A	AML	no-ITD	-68.0198	12.7811
SJAML030099_D1	Stranded_total_RNA_PE125bp	NoFusion	AML	AML	AML-other	AML	no-ITD	-8.25142	-8.37856
SJAML030118_D1	Stranded_total_RNA_PE125bp	NoFusion	AML	AML	AML-other	AML	no-ITD	-71.9649	8.07947
SJAML030119_D1	Stranded_total_RNA_PE125bp	RUNX1-RUNX1T1	AML	AML	RUNX1-RUNX1T1	AML	no-ITD	-55.1701	59.9776
SJAML030120_D1	Stranded_total_RNA_PE125bp	CBFA2T3-GLIS2	AML	AML	AML-other	AML	no-ITD	-33.8876	-29.2746
SJAML030151_D1	Stranded_total_RNA_PE125bp	CBFB-MYH11	AML	AML	CBFB-MYH11	AML	no-ITD	-79.0863	76.9573
SJAML030153_D1	Stranded_total_RNA_PE125bp	NoFusion	AML	AML	AML-other	AML	no-ITD	-65.2438	8.43371
SJAML030155_D1	Stranded_total_RNA_PE125bp	KMT2A-MLLT3	AML	AML	KMT2A	AML	no-ITD	-36.0579	-18.116
SJAML030156_D1	Stranded_total_RNA_PE125bp	NoFusion	AML	AML	AML-other	AML	no-ITD	-18.7651	6.70698
SJAML030163_D1	Stranded_total_RNA_PE125bp	RUNX1-RUNX1T1	AML	AML	RUNX1-RUNX1T1	AML	no-ITD	-63.7406	65.1213
SJAML030186_D1	Stranded_total_RNA_PE125bp	NoFusion	AML	AML	AML-other	AML	no-ITD	-28.7796	12.4402
SJAML030195_D1	Stranded_total_RNA_PE125bp	RUNX1-RUNX1T1	AML	AML	RUNX1-RUNX1T1	AML	no-ITD	-59.0452	64.6662
SJAML030200_D1	Stranded_total_RNA_PE125bp	ELL-KMT2A	AML	AML	KMT2A	AML	no-ITD	-43.6397	17.9722
SJAML030208_D1	Stranded_total_RNA_PE125bp	RUNX1-RUNX1T1	AML	AML	RUNX1-RUNX1T1	AML	no-ITD	-60.353	63.556
SJAML030209_D1	Stranded_total_RNA_PE125bp	NoFusion	AML	AML	AML-other	AML	no-ITD	-30.7931	-20.4477
SJAML030231_D1	Stranded_total_RNA_PE125bp	CBFB-MYH11	AML	AML	CBFB-MYH11	AML	no-ITD	-83.8907	80.5105
SJAML030233_D1	Stranded_total_RNA_PE125bp	PML-RARA	AML	AML	AML-other	AML	ITD	-48.4806	38.0382
SJAML030286_D1	Stranded_total_RNA_PE125bp	NoFusion	AML	AML	AML-other	AML	ITD	-37.3839	22.919
SJAML030287_D1	Stranded_total_RNA_PE125bp	PML-RARA	AML	AML	AML-other	AML	ITD	-48.0015	37.0363
SJAML030297_D1	Stranded_total_RNA_PE125bp	NoFusion	AML	AML	AML-other	AML	ITD	-35.2207	34.4972
SJAML030320_D1	Stranded_total_RNA_PE125bp	NoFusion	AML	AML	AML-other	AML	no-ITD	-49.0872	18.0393
SJAML030322_D1	Stranded_total_RNA_PE125bp	NoFusion	AML	AML	AML-other	AML	no-ITD	-40.4105	18.2796
SJAML030324_D1	Stranded_total_RNA_PE125bp	MLLT10-UBE4A	AML	AML	AML-other	AML	no-ITD	-69.2496	11.8525
SJAML030345_D1	Stranded_total_RNA_PE125bp	NoFusion	AML	AML	AML-other	AML	no-ITD	-37.8398	32.5734
SJAML030361_D1	Stranded_total_RNA_PE125bp	KMT2A-MLLT10	AML	AML	KMT2A	AML	no-ITD	-65.2037	13.9243
SJAML030410_D1	Stranded_total_RNA_PE125bp	HOXA13-CDK6	AML	AML	HOXA	AML	no-ITD	9.51071	53.0456
SJAML030416_D1	Stranded_total_RNA_PE125bp	NONO-ZFP36L1	AML	AML	AML-other	AML	ITD	15.044	40.8998
SJAML030430_D1	Stranded_total_RNA_PE125bp	CBFB-MYH11	AML	AML	CBFB-MYH11	AML	no-ITD	-81.4562	78.8538
SJAML030431_D1	Stranded_total_RNA_PE125bp	NFIC-SAFB	AML	AML	AML-other	AML	no-ITD	24.3735	34.2674
SJAML030440_D1	Stranded_total_RNA_PE125bp	KMT2A-MLLT3	AML	AML	KMT2A	AML	no-ITD	-33.6979	15.2864
SJAML030454_D1	Stranded_total_RNA_PE125bp	RUNX1-RUNX1T1	AML	AML	RUNX1-RUNX1T1	AML	no-ITD	-61.9475	55.0647
SJAML030459_D1	Stranded_total_RNA_PE125bp	MLLT10-PICALM	AML	AML	PICALM-MLLT10	AML	no-ITD	21.4352	48.1293
SJAML030464_D1	Stranded_total_RNA_PE125bp	KMT2A-MLLT3	AML	AML	KMT2A	AML	no-ITD	-74.1918	5.79865
SJAML030471_D1	Stranded_total_RNA_PE125bp	RUNX1-RUNX1T1	AML	AML	RUNX1-RUNX1T1	AML	ITD	-61.9232	64.2685
SJAML030509_D1	Stranded_total_RNA_PE125bp	RUNX1-CBFA2T3	AML	AML	AML-other	AML	no-ITD	-67.1871	54.6028
SJAML030510_D1	Stranded_total_RNA_PE125bp	NoFusion	AML	AML	AML-other	AML	no-ITD	5.27302	35.8501
SJAML030534_D1	Stranded_total_RNA_PE125bp	KMT2A-ELL	AML	AML	KMT2A	AML	no-ITD	-45.9707	18.6176
SJAML030547_D1	Stranded_total_RNA_PE125bp	RUNX1-EVX1	AML	AML	AML-other	AML	no-ITD	-24.8489	43.9536
SJAML030560_D1	Stranded_total_RNA_PE125bp	NoFusion	AML	AML	AML-other	AML	ITD	-29.6208	31.7584
SJAML030561_D1	Stranded_total_RNA_PE125bp	CBFB-MYH11	AML	AML	CBFB-MYH11	AML	no-ITD	-81.7223	65.7448
SJAML030592_D1	Stranded_total_RNA_PE125bp	RUNX1-RUNX1T1	AML	AML	RUNX1-RUNX1T1	AML	no-ITD	-64.6455	52.1673
SJAML030601_D1	Stranded_total_RNA_PE125bp	RUNX1-RUNX1T1	AML	AML	RUNX1-RUNX1T1	AML	no-ITD	-65.2257	53.281
SJAML030612_D1	Stranded_total_RNA_PE125bp	CBFB-MYH11	AML	AML	CBFB-MYH11	AML	no-ITD	-82.5323	73.9595
SJAML030624_D1	Stranded_total_RNA_PE125bp	NoFusion	AML	AML	AML-other	AML	no-ITD	-67.0005	-1.66787
SJAML030669_D1	Stranded_total_RNA_PE125bp	RUNX1-RUNX1T1	AML	AML	RUNX1-RUNX1T1	AML	no-ITD	-66.2271	59.1283
SJAML030683_D1	Stranded_total_RNA_PE125bp	CBFB-MYH11	AML	AML	CBFB-MYH11	AML	no-ITD	-81.4451	77.1274
SJAML030689_D1	Stranded_total_RNA_PE125bp	KMT2A-MLLT3	AML	AML	KMT2A	AML	no-ITD	-68.4782	-4.95097
SJAML030690_D1	Stranded_total_RNA_PE125bp	NoFusion	AML	AML	AML-other	AML	no-ITD	-32.8328	19.4801
SJAML030708_D1	Stranded_total_RNA_PE125bp	SIK3-ARHGEF12	AML	AML	AML-other	AML	no-ITD	-35.8679	31.4861
SJAML030714_D1	Stranded_total_RNA_PE125bp	NoFusion	AML	AML	AML-other	AML	no-ITD	5.16694	38.3836
SJAML030727_D1	Stranded_total_RNA_PE125bp	N4BP2L1-ZMYM2	AML	AML	AML-other	AML	no-ITD	-21.0487	3.50108
SJAML030773_D1	Stranded_total_RNA_PE125bp	TEC-MLLT10	AML	AML	AML-other	AML	no-ITD	-29.902	-18.678
SJAML030778_D1	Stranded_total_RNA_PE125bp	NoFusion	AML	AML	AML-other	AML	no-ITD	-35.1331	30.4967
SJAML030799_D1	Stranded_total_RNA_PE125bp	NoFusion	AML	AML	AML-other	AML	no-ITD	-22.7318	5.54651
SJAML030852_D1	Stranded_total_RNA_PE125bp	CREBBP-KAT6A	AML	AML	AML-other	AML	no-ITD	-55.9743	5.71381
SJAML030881_D1	Stranded_total_RNA_PE125bp	RUNX1-RUNX1T1	AML	AML	RUNX1-RUNX1T1	AML	no-ITD	-64.7496	63.0946
SJAML030934_D1	Stranded_total_RNA_PE125bp	NoFusion	AML	AML	AML-other	AML	no-ITD	-6.32173	28.2661
SJAML030947_D1	Stranded_total_RNA_PE125bp	NoFusion	AML	AML	AML-other	AML	no-ITD	-22.7163	17.544
SJAML030987_D1	Stranded_total_RNA_PE125bp	MLLT10-DNAJC1	AML	AML	AML-other	AML	no-ITD	-77.4857	7.85412
SJAML030988_D1	Stranded_total_RNA_PE125bp	MLLT10-PICALM	AML	AML	PICALM-MLLT10	AML	no-ITD	26.2664	60.138
SJAML031022_D1	Stranded_total_RNA_PE125bp	RUNX1-RUNX1T1	AML	AML	RUNX1-RUNX1T1	AML	no-ITD	-64.3817	59.1373
SJAML031051_D1	Stranded_total_RNA_PE125bp	KMT2A-MLLT6	AML	AML	KMT2A	AML	no-ITD	-76.446	6.85349
SJAML031065_D1	Stranded_total_RNA_PE125bp	NoFusion	AML	AML	AML-other	AML	no-ITD	-15.5918	-2.8266
SJAML031075_D1	Stranded_total_RNA_PE125bp	NoFusion	AML	AML	AML-other	AML	no-ITD	-40.719	-18.4013
SJAML031082_D1	Stranded_total_RNA_PE125bp	ERG-FUS	AML	AML	AML-other	AML	no-ITD	-1.89735	37.5286
SJAML031106_D1	Stranded_total_RNA_PE125bp	NoFusion	AML	AML	AML-other	AML	no-ITD	-39.2285	17.2696
SJAML031120_D1	Stranded_total_RNA_PE125bp	KMT2A-MLLT3	AML	AML	KMT2A	AML	no-ITD	-63.0576	14.206
SJAML031121_D1	Stranded_total_RNA_PE125bp	MYB-GATA1	AML	AML	AML-other	AML	no-ITD	-42.4621	-17.2242
SJAML031186_D1	Stranded_total_RNA_PE125bp	RUNX1-RUNX1T1	AML	AML	RUNX1-RUNX1T1	AML	no-ITD	-54.878	58.2147
SJAML031200_D1	Stranded_total_RNA_PE125bp	RUNX1-RUNX1T1(CICERO)	AML	AML	RUNX1-RUNX1T1	AML	no-ITD	-66.1159	61.0411
SJAML031206_D1	Stranded_total_RNA_PE125bp	NoFusion	AML	AML	AML-other	AML	no-ITD	-18.808	26.3679
SJAML031249_D1	Stranded_total_RNA_PE125bp	KMT2A-MLLT3	AML	AML	KMT2A	AML	no-ITD	-72.6553	6.14475
SJAML031259_D1	Stranded_total_RNA_PE125bp	TTC3-CBFB	AML	AML	AML-other	AML	no-ITD	-80.6796	74.6781
SJAML031272_D2	Stranded_total_RNA_PE125bp	NoFusion	AML	AML	AML-other	AML	no-ITD	-20.0143	16.3956
SJAML031300_D1	Stranded_total_RNA_PE125bp	MLLT10-ARMC3	AML	AML	AML-other	AML	no-ITD	-38.217	-17.7355
SJAML031302_D2	Stranded_total_RNA_PE125bp	CBFB-MYH11	AML	AML	CBFB-MYH11	AML	no-ITD	-83.6525	77.9001
SJAML031311_D1	Stranded_total_RNA_PE125bp	KMT2A-MLLT10	AML	AML	KMT2A	AML	no-ITD	-67.1222	0.144511
SJAML031312_D1	Stranded_total_RNA_PE125bp	NoFusion	AML	AML	AML-other	AML	no-ITD	6.22032	38.1327
SJAML031316_D1	Stranded_total_RNA_PE125bp	KMT2A-AFDN	AML	AML	KMT2A	AML	no-ITD	-35.9945	19.371
SJAML031336_D1	Stranded_total_RNA_PE125bp	RUNX1-RUNX1T1	AML	AML	RUNX1-RUNX1T1	AML	no-ITD	-64.0288	55.9632
SJAML031343_D1	Stranded_total_RNA_PE125bp	C5ORF56-C15ORF53	AML	AML	AML-other	AML	no-ITD	-33.4562	32.1904
SJAML031359_D1	Stranded_total_RNA_PE125bp	NoFusion	AML	AML	AML-other	AML	no-ITD	-8.04874	9.7953
SJAML031399_D1	Stranded_total_RNA_PE125bp	KMT2A-AFDN	AML	AML	KMT2A	AML	no-ITD	-64.2134	12.9132
SJAML031409_D1	Stranded_total_RNA_PE125bp	RUNX1-CBFA2T2	AML	AML	AML-other	AML	no-ITD	-60.8182	58.7598
SJAML031417_D1	Stranded_total_RNA_PE125bp	KMT2A-MLLT1	AML	AML	KMT2A	AML	no-ITD	-68.2224	7.28138
SJAML031419_D1	Stranded_total_RNA_PE125bp	NoFusion	AML	AML	AML-other	AML	no-ITD	-42.2329	28.9777
SJAML031469_D1	Stranded_total_RNA_PE125bp	RUNX1-RUNX1T1	AML	AML	RUNX1-RUNX1T1	AML	no-ITD	-65.7403	57.1986
SJAML031477_D1	Stranded_total_RNA_PE125bp	NoFusion	AML	AML	AML-other	AML	no-ITD	-28.3331	-20.7524
SJHM031438_D1	Stranded_total_RNA_PE125bp	NoFusion	MPAL	MPAL(T/M?)	MPAL-other	MPAL	no-ITD	11.377	48.4227
SJHM030269_D1	Stranded_total_RNA_PE125bp	KMT2A-MLLT1	MPAL	MPAL(KMT2A)	KMT2A	MPAL	no-ITD	-66.8389	-4.36369
SJHM030369_D1	Stranded_total_RNA_PE125bp	CBFA2T3-GLIS3	MPAL	MPAL(T/M?)	MPAL-other	MPAL	no-ITD	-32.8903	-20.3946
SJHM031626_D1	Stranded_total_RNA_PE125bp	KMT2A-AFDN	MPAL	MPAL(KMT2A)	KMT2A	MPAL	no-ITD	16.5014	19.754
SJTALL030047_D1	Stranded_total_RNA_PE125bp	NoFusion	MPAL	MPAL(T/M?)	MPAL-other	MPAL	no-ITD	18.2499	41.0434
SJAML031434_D1	Stranded_total_RNA_PE125bp	NUP98-NSD1	AML	AML	NUP98	AML	ITD	-47.6635	17.3688
SJAML031528_D1	Stranded_total_RNA_PE125bp	KMT2A-ELL	AML	AML	KMT2A	AML	no-ITD	-54.2855	6.75585
SJAML031579_D1	Stranded_total_RNA_PE125bp	NoFusion	AML	AML	AML-other	AML	no-ITD	-19.7338	-7.53489
SJAML031601_D1	Stranded_total_RNA_PE125bp	RUNX1-RUNX1T1	AML	AML	RUNX1-RUNX1T1	AML	no-ITD	-57.8055	58.206
SJAML031606_D1	Stranded_total_RNA_PE125bp	RUNX1-POU2F2	AML	AML	AML-other	AML	no-ITD	-18.8601	4.2279
SJAML031686_D1	Stranded_total_RNA_PE125bp	RUNX1-CBFA2T3	AML	AML	AML-other	AML	no-ITD	-59.667	60.4731
SJAML031719_D1	Stranded_total_RNA_PE125bp	TBL1XR1-RARB	AML	AML	AML-other	AML	no-ITD	-46.8086	34.9905
SJAML031760_D1	Stranded_total_RNA_PE125bp	RUNX1-RUNX1T1	AML	AML	RUNX1-RUNX1T1	AML	no-ITD	-57.3439	59.9373
SJAML031781_D1	Stranded_total_RNA_PE125bp	NoFusion	AML	AML	AML-other	AML	no-ITD	-29.0828	33.3798
SJAML031855_D1	Stranded_total_RNA_PE125bp	CBFB-MYH11	AML	AML	CBFB-MYH11	AML	no-ITD	-83.9944	75.8734
SJAML031924_D1	Stranded_total_RNA_PE125bp	NUP214-DEK	AML	AML	AML-other	AML	ITD	-34.7994	22.6462
SJTALL031315_D1	Stranded_total_RNA_PE125bp	ETV6-HOXA13	T-ALL	T-ALL	HOXA	ETP	no-ITD	9.55859	51.8212
SJTALL031337_D1	Stranded_total_RNA_PE125bp	NoFusion	T-ALL	T-ALL	T-other	NA	no-ITD	-31.4744	-109.026
SJTALL031446_D1	Stranded_total_RNA_PE125bp	STIL-TAL1	T-ALL	T-ALL	TAL1	NA	no-ITD	24.3293	-87.4412
SJTALL031474_D1	Stranded_total_RNA_PE125bp	KMT2A-AFDN	T-ALL	T-ALL(GD)	KMT2A	NA	no-ITD	32.6229	-11.6745
SJTALL031594_D1	Stranded_total_RNA_PE125bp	LMO2-TRA	T-ALL	T-ALL	LMO1/2	NA	no-ITD	26.1635	-92.3372
SJTALL031632_D1	Stranded_total_RNA_PE125bp	LMO2-TRA	T-ALL	T-ALL	LMO1/2	NA	no-ITD	-11.2465	-72.146
SJTALL031640_D1	Stranded_total_RNA_PE125bp	NoFusion	T-ALL	T-ALL	T-other	NA	no-ITD	23.4148	21.9995
SJTALL031662_D1	Stranded_total_RNA_PE125bp	PICALM-MLLT10	T-ALL	T-ALL	PICALM-MLLT10	NA	no-ITD	37.2291	-12.4586
SJTALL031798_D1	Stranded_total_RNA_PE125bp	PICALM-MLLT10	T-ALL	T-ALL	PICALM-MLLT10	NA	no-ITD	34.8512	15.9975
SJTALL031832_D1	Stranded_total_RNA_PE125bp	TLX1-TRB	T-ALL	T-ALL	TLX1	NA	no-ITD	94.513	-7.46711
SJTALL031904_D1	Stranded_total_RNA_PE125bp	PICALM-MLLT10	T-ALL	T-ALL	PICALM-MLLT10	NA	no-ITD	34.6238	-5.83553
SJBALL047020_D1	Stranded_total_RNA_PE100bp	NoFusion	T-ALL	T-ALL	NKX2_1	NA	no-ITD	46.0264	-67.8536
SJBALL047367_D1	Stranded_total_RNA_PE100bp	NoFusion	T-ALL	T-ALL	T-other	NA	no-ITD	-22.5172	56.4269
SJTALL005006_D2	Stranded_total_RNA_PE100bp	BCL11B enh amp	T-ALL	T-ALL	BCL11B	NA	ITD	-33.0024	111.358
SJTALL037_D	Stranded_total_RNA_PE100bp	STIL-TAL1	T-ALL	T-ALL	TAL1	notETP	no-ITD	5.60883	-58.738
SJTALL068_D	Stranded_total_RNA_PE100bp	NoFusion	T-ALL	T-ALL	T-other	notETP	no-ITD	-38.3948	-99.1706
SJTALL076_D	Stranded_total_RNA_PE100bp	GRHL1-MYB	T-ALL	T-ALL	T-other	NA	no-ITD	30.4436	-55.6006
SJTALL088_D	Stranded_total_RNA_PE100bp	PICALM-MLLT10	T-ALL	T-ALL	PICALM-MLLT10	NA	no-ITD	58.4495	-4.89582
SJALL044291_D1	Stranded_total_RNA_PE100bp	BCL11B-ARID1B	T-ALL	T-ALL	BCL11B	NA	ITD	-32.0581	104.413
SJALL044300_D1	Stranded_total_RNA_PE100bp	PICALM-MLLT10	T-ALL	T-ALL	PICALM-MLLT10	NA	no-ITD	-3.27327	62.92
SJALL047527_D1	Stranded_total_RNA_PE100bp	LYL1-IGH	T-ALL	T-ALL	T-other	NA	no-ITD	-9.47655	-62.5884
SJALL047977_D1	Stranded_total_RNA_PE100bp	NoFusion	T-ALL	T-ALL	TLX3	NA	no-ITD	62.2344	40.4599
SJALL048081_D1	Stranded_total_RNA_PE100bp	SET-NUP214	T-ALL	T-ALL	SET-NUP214	NA	no-ITD	1.06868	58.9724
SJALL048085_D1	Stranded_total_RNA_PE100bp	TRB-TLX1	T-ALL	T-ALL	TLX1	NA	no-ITD	75.4966	-21.5021
SJALL048087_D1	Stranded_total_RNA_PE100bp	NoFusion	T-ALL	T-ALL	T-other	NA	no-ITD	-8.12847	70.1548
SJTALL001_D	Stranded_total_RNA_PE100bp	MED14-HOXA9;ABCC9-ITPR2	T-ALL	T-ALL	HOXA	ETP	no-ITD	-7.00367	69.227
SJTALL005_D	Stranded_total_RNA_PE100bp	NUP98-RAP1GDS1	T-ALL	T-ALL	NUP98	ETP	no-ITD	4.14573	58.7741
SJTALL005003_D2	Stranded_total_RNA_PE100bp	NoFusion	T-ALL	T-ALL	T-other	NA	no-ITD	-15.5827	37.0947
SJTALL016_D	Stranded_total_RNA_PE100bp	NoFusion	T-ALL	T-ALL	T-other	notETP	no-ITD	6.15935	-55.9935
SJTALL019_D	Stranded_total_RNA_PE100bp	NUP214-ABL1	T-ALL	T-ALL	T-other	notETP	no-ITD	36.0157	41.2876
SJTALL020_D	Stranded_total_RNA_PE100bp	NFIX-TRB	T-ALL	T-ALL	T-other	notETP	no-ITD	18.2479	-89.3446
SJTALL021_D	Stranded_total_RNA_PE100bp	NoFusion	T-ALL	T-ALL	T-other	notETP	no-ITD	18.905	-87.7158
SJTALL022_D	Stranded_total_RNA_PE100bp	TLX1-TRB	T-ALL	T-ALL	TLX1	notETP	no-ITD	59.8247	14.1527
SJTALL023_D	Stranded_total_RNA_PE100bp	NoFusion	T-ALL	T-ALL(GD)	T-other	notETP	no-ITD	-42.4569	-69.4402
SJTALL024_D	Stranded_total_RNA_PE100bp	STIL-TAL1	T-ALL	T-ALL	TAL1	notETP	no-ITD	-39.6659	-95.7236
SJTALL025_D	Stranded_total_RNA_PE100bp	STIL-TAL1	T-ALL	T-ALL	TAL1	notETP	no-ITD	-43.2859	-73.3158
SJTALL026_D	Stranded_total_RNA_PE100bp	NoFusion	T-ALL	T-ALL	T-other	notETP	no-ITD	-36.7362	-97.4025
SJTALL027_D	Stranded_total_RNA_PE100bp	STIL-TAL1	T-ALL	T-ALL	TAL1	notETP	no-ITD	-12.7997	-36.3594
SJTALL028_D	Stranded_total_RNA_PE100bp	NoFusion	T-ALL	T-ALL	T-other	notETP	no-ITD	32.768	-55.4857
SJTALL029_D	Stranded_total_RNA_PE100bp	NoFusion	T-ALL	T-ALL	TLX3	notETP	no-ITD	79.2686	16.8999
SJTALL032_D	Stranded_total_RNA_PE100bp	STIL-TAL1	T-ALL	T-ALL	TAL1	notETP	no-ITD	-40.3374	-97.8151
SJTALL033_D	Stranded_total_RNA_PE100bp	TRB-NFIX	T-ALL	T-ALL	T-other	notETP	no-ITD	-8.79305	-64.0514
SJTALL035_D	Stranded_total_RNA_PE100bp	NoFusion	T-ALL	T-ALL	T-other	notETP	no-ITD	-11.1272	-31.3373
SJTALL036_D	Stranded_total_RNA_PE100bp	NoFusion	T-ALL	T-ALL	T-other	notETP	no-ITD	13.1329	-89.4806
SJTALL038_D	Stranded_total_RNA_PE100bp	NoFusion	T-ALL	T-ALL	T-other	notETP	no-ITD	32.4149	-53.7739
SJTALL040_D	Stranded_total_RNA_PE100bp	STIL-TAL1	T-ALL	T-ALL	TAL1	notETP	no-ITD	-35.3106	-98.4395
SJTALL041_D	Stranded_total_RNA_PE100bp	NoFusion	T-ALL	T-ALL	TLX3	notETP	no-ITD	64.1219	41.7913
SJTALL043806_D1	Stranded_total_RNA_PE100bp	NoFusion	T-ALL	T-ALL	TLX1	NA	no-ITD	79.9304	-13.7214
SJTALL043821_D1	Stranded_total_RNA_PE100bp	NoFusion	T-ALL	T-ALL	TLX1	NA	no-ITD	79.3979	-16.9524
SJTALL043832_D1	Stranded_total_RNA_PE100bp	STIL-TAL1	T-ALL	T-ALL	TAL1	NA	no-ITD	-0.622906	-59.2924
SJTALL063_D	Stranded_total_RNA_PE100bp	NoFusion	T-ALL	T-ALL	TLX3	NA	no-ITD	83.733	2.93365
SJTALL064_D	Stranded_total_RNA_PE100bp	NoFusion	T-ALL	T-ALL	TLX3	NA	no-ITD	83.0434	1.36594
SJTALL065_D	Stranded_total_RNA_PE100bp	UBE3C-KCNT2	T-ALL	T-ALL	T-other	NA	no-ITD	-13.9263	62.2121
SJTALL066_D	Stranded_total_RNA_PE100bp	NoFusion	T-ALL	T-ALL	NKX2_1	notETP	no-ITD	45.2638	-65.2943
SJTALL067_D	Stranded_total_RNA_PE100bp	NoFusion	T-ALL	T-ALL	T-other	notETP	no-ITD	14.2842	-90.1546
SJTALL069_D	Stranded_total_RNA_PE100bp	KMT2A-MLLT1	T-ALL	T-ALL	KMT2A	notETP	no-ITD	22.6462	-17.1423
SJTALL070_D	Stranded_total_RNA_PE100bp	SET-NUP214	T-ALL	T-ALL	SET-NUP214	notETP	no-ITD	55.3384	-1.27303
SJTALL071_D	Stranded_total_RNA_PE100bp	NoFusion	T-ALL	T-ALL	T-other	notETP	no-ITD	12.2829	55.9683
SJTALL072_D	Stranded_total_RNA_PE100bp	NoFusion	T-ALL	T-ALL	NKX2_1	NA	no-ITD	46.3293	-64.8994
SJTALL073_D	Stranded_total_RNA_PE100bp	NoFusion	T-ALL	T-ALL	T-other	NA	no-ITD	-10.7205	-85.7026
SJTALL074_D	Stranded_total_RNA_PE100bp	NoFusion	T-ALL	T-ALL	TLX3	NA	no-ITD	80.4081	19.6638
SJTALL075_D	Stranded_total_RNA_PE100bp	HNRNPH1-MLLT10	T-ALL	T-ALL	T-other	notETP	no-ITD	4.15587	55.1912
SJTALL078_D	Stranded_total_RNA_PE100bp	NoFusion	T-ALL	T-ALL	T-other	notETP	no-ITD	57.108	-6.35136
SJTALL079_D	Stranded_total_RNA_PE100bp	NoFusion	T-ALL	T-ALL	T-other	notETP	no-ITD	-19.432	-79.3481
SJTALL080_D	Stranded_total_RNA_PE100bp	NoFusion	T-ALL	T-ALL	TLX3	notETP	no-ITD	81.4658	4.20293
SJTALL081_D	Stranded_total_RNA_PE100bp	PCNT-JAK2;LMAN2-EFCAB11	T-ALL	T-ALL	TLX3	notETP	no-ITD	68.5625	24.5794
SJTALL083_D	Stranded_total_RNA_PE100bp	NoFusion	T-ALL	T-ALL	T-other	NA	no-ITD	7.35371	-95.1241
SJTALL084_D	Stranded_total_RNA_PE100bp	DDX3X-MLLT10	T-ALL	T-ALL	DDX3X-MLLT10	NA	no-ITD	42.0838	-6.90734
SJTALL085_D	Stranded_total_RNA_PE100bp	NoFusion	T-ALL	T-ALL	nonTCR-LMO2	NA	no-ITD	31.1882	-44.3372
SJTALL087_D	Stranded_total_RNA_PE100bp	STIL-TAL1	T-ALL	T-ALL	TAL1	NA	no-ITD	-18.0263	-46.405
SJTALL221_D	Stranded_total_RNA_PE100bp	NoFusion	T-ALL	T-ALL	TLX3	NA	no-ITD	64.5637	12.2614
SJBALL013901_D1	Stranded_total_RNA_PE100bp	NoFusion	T-ALL	T-ALL	TLX1	NA	no-ITD	87.3472	-20.5579
SJBALL013872_D1	Stranded_total_RNA_PE100bp	PICALM-MLLT10	T-ALL	T-ALL	PICALM-MLLT10	NA	no-ITD	-22.052	59.7307
SJBALL013864_D1	Stranded_total_RNA_PE100bp	NoFusion	T-ALL	T-ALL	T-other	NA	no-ITD	12.5464	-62.6129
SJBALL013861_D1	Stranded_total_RNA_PE100bp	NoFusion	T-ALL	T-ALL	TLX1	NA	no-ITD	85.4728	-19.2184
SJALL049112_D1	Stranded_total_RNA_PE100bp	ETV3-NCOA2	T-ALL	T-ALL	T-other	NA	no-ITD	-36.0845	50.3611
SJALL049669_D1	Stranded_total_RNA_PE100bp	NFATC3-ZSCAN5C	T-ALL	T-ALL	T-other	NA	no-ITD	-21.5518	62.5099
SJALL050551_D1	Stranded_total_RNA_PE100bp	NoFusion	T-ALL	T-ALL	T-other	NA	no-ITD	-5.18314	46.4334
SJALL054752_D1	Stranded_total_RNA_PE100bp	NoFusion	T-ALL	T-ALL	T-other	NA	no-ITD	58.421	43.8063
SJALL054757_D1	Stranded_total_RNA_PE100bp	KCNAB2-CIZ1	T-ALL	T-ALL	T-other	NA	no-ITD	2.31035	78.5473
SJALL055895_D1	Stranded_total_RNA_PE100bp	SET-NUP214	T-ALL	T-ALL	SET-NUP214	NA	no-ITD	-2.7124	60.0077
SJALL057920_D1	Stranded_total_RNA_PE100bp	NoFusion	T-ALL	T-ALL	T-other	NA	no-ITD	-32.7098	-84.6877
SJALL057922_D1	Stranded_total_RNA_PE100bp	NoFusion	T-ALL	T-ALL	T-other	NA	no-ITD	19.3805	-64.0263
SJALL057923_D1	Stranded_total_RNA_PE100bp	MYB-AHI1;STIL-TAL1	T-ALL	T-ALL	TAL1	NA	no-ITD	-43.7294	-95.7147
SJALL059516_D1	Stranded_total_RNA_PE100bp	NoFusion	T-ALL	T-ALL	T-other	NA	no-ITD	-2.86484	52.5269
SJALL059518_D1	Stranded_total_RNA_PE100bp	AC245088.2-AC245427.1	T-ALL	T-ALL	T-other	NA	no-ITD	14.1957	-87.0992
SJALL059520_D1	Stranded_total_RNA_PE100bp	DDX3X-MLLT10	T-ALL	T-ALL	DDX3X-MLLT10	NA	no-ITD	4.17461	66.5268
SJALL059528_D1	Stranded_total_RNA_PE100bp	NoFusion	T-ALL	T-ALL	T-other	NA	no-ITD	-23.5467	-9.44649
SJALL059529_D1	Stranded_total_RNA_PE100bp	NUP214-ABL1	T-ALL	T-ALL	TLX1	NA	no-ITD	86.5398	-22.1051
SJALL060401_D1	Stranded_total_RNA_PE100bp	BCL11B-ARID1B	T-ALL	T-ALL	BCL11B	NA	no-ITD	-27.3813	114.533
SJALL061697_D1	Stranded_total_RNA_PE100bp	NoFusion	T-ALL	T-ALL	T-other	NA	no-ITD	-14.7662	66.0744
SJALL061272_D1	Stranded_total_RNA_PE100bp	CTCF-NFATC3	T-ALL	T-ALL	TLX3	NA	no-ITD	64.2607	40.0647
SJALL003226_D3	Stranded_total_RNA_PE100bp	NoFusion	T-ALL	T-ALL(GD)	nonTCR-LMO2	NA	no-ITD	28.2935	-36.9537
SJALL015715_D2	Stranded_total_RNA_PE100bp	EIF4G1-ECE2	T-ALL	T-ALL	T-other	NA	no-ITD	32.2833	52.5423
SJALL018294_D2	Stranded_total_RNA_PE100bp	BCL11B-ARID1B	T-ALL	T-ALL	BCL11B	NA	ITD	-31.3628	111.185
SJALL018298_D5	Stranded_total_RNA_PE100bp	NoFusion	T-ALL	T-ALL	TLX1	NA	no-ITD	76.1758	-20.1119
SJALL048318_D5	Stranded_total_RNA_PE100bp	NoFusion	T-ALL	T-ALL	T-other	NA	no-ITD	-0.0618734	52.9244
SJALL048330_D6	Stranded_total_RNA_PE100bp	NoFusion	T-ALL	T-ALL	T-other	NA	no-ITD	-5.22047	-59.3235
SJALL048338_D4	Stranded_total_RNA_PE100bp	KDM6A-JADE3	T-ALL	T-ALL	T-other	NA	no-ITD	-12.6088	-17.1329
SJALL048340_D3	Stranded_total_RNA_PE100bp	KMT2A-MLLT1;PDCD6IP-TASP1;DEXI-TASP1	T-ALL	T-ALL	KMT2A	NA	no-ITD	10.2364	-18.2162
SJALL048378_D5	Stranded_total_RNA_PE100bp	NoFusion	T-ALL	T-ALL	T-other	NA	no-ITD	-2.81938	-59.9399
SJALL048383_D7	Stranded_total_RNA_PE100bp	RIC3-TRB;IGH-DLGAP5	T-ALL	T-ALL	TAL2	NA	no-ITD	-37.7347	-70.4719
SJALL048411_D6	Stranded_total_RNA_PE100bp	KMT2A-MLLT1;DEXI-TASP1;PDCD6IP-TASP1	T-ALL	T-ALL	KMT2A	NA	no-ITD	8.79127	-19.2515
SJALL048456_D5	Stranded_total_RNA_PE100bp	HNRNPC-ZNF219	T-ALL	T-ALL	T-other	NA	no-ITD	-1.55232	-62.3489
SJALL048457_D6	Stranded_total_RNA_PE100bp	PICALM-MLLT10	T-ALL	T-ALL(GD)	PICALM-MLLT10	NA	no-ITD	32.8935	4.56678
SJALL048494_D3	Stranded_total_RNA_PE100bp	NoFusion	T-ALL	T-ALL	T-other	NA	no-ITD	4.20646	-64.8494
SJALL058377_D2	Stranded_total_RNA_PE100bp	NoFusion	T-ALL	T-ALL	T-other	NA	no-ITD	-9.04694	-30.6176
SJALL060465_D2	Stranded_total_RNA_PE100bp	BCR-ABL1;HOXA10-TRDC	T-ALL	T-ALL	HOXA	NA	no-ITD	-2.6405	57.3338
SJALL061928_D2	Stranded_total_RNA_PE100bp	CDK6-EVX1	T-ALL	T-ALL	T-other	NA	no-ITD	13.0064	53.7029
SJTALL013_D	Stranded_total_RNA_PE100bp	NAP1L1-MLLT10	T-ALL	T-ALL	T-other	ETP	no-ITD	-6.41367	58.6411
SJTALL054_D	Stranded_total_RNA_PE100bp	NoFusion	T-ALL	T-ALL	TLX3	notETP	no-ITD	79.5883	22.0777
SJTALL094_D	Stranded_total_RNA_PE100bp	TBL1XR1-ABL1	T-ALL	T-ALL	T-other	notETP	no-ITD	-14.1734	-37.5404
SJTALL139_D	Stranded_total_RNA_PE100bp	STIL-TAL1	T-ALL	T-ALL	TAL1	notETP	no-ITD	-18.3682	-80.4818
SJTALL142_D	Stranded_total_RNA_PE100bp	NoFusion	T-ALL	T-ALL	T-other	notETP	no-ITD	-17.183	-82.3038
SJTALL152_D	Stranded_total_RNA_PE100bp	STIL-TAL1;PAFAH1B1-USP6	T-ALL	T-ALL	TAL1	notETP	no-ITD	48.0876	42.162
SJALL068271_D1	MLL-Stranded_total_RNA_PE100bp	BCL11B-SATB1	T-ALL	T-ALL	BCL11B	ETP	ITD	-26.2655	96.8936
MLL_00223	MLL-Stranded_total_RNA_PE100bp	NoFusion	T-ALL	T-ALL	T-other	notETP	no-ITD	0.2522	44.7059
MLL_00224	MLL-Stranded_total_RNA_PE100bp	NoFusion	T-ALL	T-ALL	TLX3	notETP	no-ITD	88.8467	17.8391
SJALL068272_D1	MLL-Stranded_total_RNA_PE100bp	BCL11B enh amp	T-ALL	T-ALL	BCL11B	ETP	no-ITD	-21.2855	98.7103
MLL_00226	MLL-Stranded_total_RNA_PE100bp	NoFusion	T-ALL	T-ALL	T-other	ETP	no-ITD	37.5151	36.999
SJALL068273_D1	MLL-Stranded_total_RNA_PE100bp	CCDC26-BCL11B	T-ALL	T-ALL	BCL11B	ETP	TKD	-24.7024	103.35
MLL_00228	MLL-Stranded_total_RNA_PE100bp	NoFusion	T-ALL	T-ALL	TLX3	ETP	no-ITD	68.8127	22.5793
MLL_12298	MLL-Stranded_total_RNA_PE100bp	TLX1-TCRA	T-ALL	T-ALL	TLX1	notETP	no-ITD	91.691	-5.16545
MLL_12500	MLL-Stranded_total_RNA_PE100bp	XPO1-MLLT10;WAC-XPO1;MLLT10-WAC	T-ALL	T-ALL	T-other	notETP	no-ITD	44.5424	-9.93159
MLL_12512	MLL-Stranded_total_RNA_PE100bp	TLX1-TCRB	T-ALL	T-ALL	TLX1	notETP	no-ITD	86.5784	-3.63628
MLL_12519	MLL-Stranded_total_RNA_PE100bp	DDX3X-MLLT10	T-ALL	T-ALL	DDX3X-MLLT10	ETP	no-ITD	25.7282	-3.2608
MLL_12546	MLL-Stranded_total_RNA_PE100bp	NoFusion	T-ALL	T-ALL	T-other	notETP	no-ITD	-32.2914	-45.1872
SJALL068277_D1	MLL-Stranded_total_RNA_PE100bp	BCL11B enh amp	T-ALL	T-ALL	BCL11B	ETP	TKD	-28.2125	99.9248
MLL_12559	MLL-Stranded_total_RNA_PE100bp	NUP98-RAP1GDS1	T-ALL	T-ALL	NUP98	ETP	ITD	14.4789	4.1284
MLL_12561	MLL-Stranded_total_RNA_PE100bp	STIL-TAL1	T-ALL	T-ALL	TAL1	notETP	no-ITD	-41.7409	-83.139
MLL_12766	MLL-Stranded_total_RNA_PE100bp	NoFusion	T-ALL	T-ALL	TLX1	notETP	no-ITD	80.6502	-25.4982
MLL_13906	MLL-Stranded_total_RNA_PE100bp	TLX1-TCRA	T-ALL	T-ALL	TLX1	notETP	no-ITD	91.6165	-10.893
MLL_13972	MLL-Stranded_total_RNA_PE100bp	TCRA-TLX1	T-ALL	T-ALL	TLX1	notETP	no-ITD	87.9631	-5.23393
MLL_13978	MLL-Stranded_total_RNA_PE100bp	NoFusion	T-ALL	T-ALL	T-other	notETP	no-ITD	1.65924	-57.361
MLL_14315	MLL-Stranded_total_RNA_PE100bp	NoFusion	T-ALL	T-ALL	TLX1	notETP	no-ITD	87.8589	-8.47746
MLL_14321	MLL-Stranded_total_RNA_PE100bp	NoFusion	T-ALL	T-ALL	TLX1	notETP	no-ITD	92.4223	-15.3202
SJALL068279_D1	MLL-Stranded_total_RNA_PE100bp	BCL11B-ARID1B	T-ALL	T-ALL	BCL11B	ETP	TKD	-22.4508	111.192
MLL_14755	MLL-Stranded_total_RNA_PE100bp	NoFusion	T-ALL	T-ALL	T-other	notETP	no-ITD	-31.0633	-44.4591
MLL_14757	MLL-Stranded_total_RNA_PE100bp	NoFusion	T-ALL	T-ALL	T-other	notETP	no-ITD	53.2607	-7.03695
MLL_16409	MLL-Stranded_total_RNA_PE100bp	SET-NUP214	T-ALL	T-ALL	SET-NUP214	notETP	no-ITD	34.9597	-9.50238
MLL_19559	MLL-Stranded_total_RNA_PE100bp	NoFusion	T-ALL	T-ALL	T-other	ETP	no-ITD	36.5563	39.6606
MLL_19689	MLL-Stranded_total_RNA_PE100bp	CTNNB1-ETV6	T-ALL	T-ALL	T-other	notETP	no-ITD(IGV)	-9.08707	40.8637
MLL_19706	MLL-Stranded_total_RNA_PE100bp	NUP214-ABL1	T-ALL	T-ALL	TLX1	notETP	no-ITD	77.0813	-23.3207
MLL_20402	MLL-Stranded_total_RNA_PE100bp	TRB-AHI1	T-ALL	T-ALL	T-other	notETP	no-ITD	23.8174	-65.1013
MLL_20888	MLL-Stranded_total_RNA_PE100bp	ETV6-HOXA11-AS	T-ALL	T-ALL	HOXA	ETP	no-ITD	12.4856	51.8077
MLL_21276	MLL-Stranded_total_RNA_PE100bp	NoFusion	T-ALL	T-ALL	T-other	notETP	no-ITD	39.2849	36.149
MLL_21377	MLL-Stranded_total_RNA_PE100bp	NUP98-RAP1GDS1	T-ALL	T-ALL	NUP98	notETP	no-ITD	52.0506	-8.37203
MLL_21385	MLL-Stranded_total_RNA_PE100bp	PICALM-MLLT10	T-ALL	T-ALL	PICALM-MLLT10	ETP	no-ITD	-16.9175	-12.4838
MLL_21971	MLL-Stranded_total_RNA_PE100bp	NoFusion	T-ALL	T-ALL	T-other	notETP	no-ITD	17.5816	23.917
MLL_21974	MLL-Stranded_total_RNA_PE100bp	NoFusion	T-ALL	T-ALL	T-other	ETP	no-ITD	26.7069	33.6718
MLL_22147	MLL-Stranded_total_RNA_PE100bp	NoFusion	T-ALL	T-ALL	T-other	ETP	no-ITD	-2.5388	-4.8612
SJALL068280_D1	MLL-Stranded_total_RNA_PE100bp	BCL11B-ARID1B	T-ALL	T-ALL	BCL11B	ETP	ITD	-20.2264	110.301
MLL_22153	MLL-Stranded_total_RNA_PE100bp	NoFusion	T-ALL	T-ALL	T-other	notETP	no-ITD	2.35505	44.1051
MLL_22162	MLL-Stranded_total_RNA_PE100bp	NoFusion	T-ALL	T-ALL	T-other	ETP	no-ITD	-9.27173	44.0808
MLL_22166	MLL-Stranded_total_RNA_PE100bp	NoFusion	T-ALL	T-ALL	TLX3	ETP	no-ITD	71.6369	43.1524
SJALL068281_D1	MLL-Stranded_total_RNA_PE100bp	BCL11B enh amp	T-ALL	T-ALL	BCL11B	ETP	ITD	-27.1864	110.086
MLL_22168	MLL-Stranded_total_RNA_PE100bp	NoFusion	T-ALL	T-ALL	TLX3	notETP	no-ITD	73.4219	40.7396
MLL_22182	MLL-Stranded_total_RNA_PE100bp	NoFusion	T-ALL	T-ALL	T-other	notETP	no-ITD	23.8769	19.4372
MLL_22183	MLL-Stranded_total_RNA_PE100bp	TLX1-TCRA	T-ALL	T-ALL	TLX1	notETP	no-ITD	76.0846	-25.4144
MLL_22189	MLL-Stranded_total_RNA_PE100bp	NoFusion	T-ALL	T-ALL	TLX1	notETP	no-ITD	71.6004	-23.6237
MLL_22502	MLL-Stranded_total_RNA_PE100bp	NoFusion	T-ALL	T-ALL	TLX3	notETP	no-ITD	71.2104	3.66579
MLL_22506	MLL-Stranded_total_RNA_PE100bp	NoFusion	T-ALL	T-ALL	T-other	notETP	no-ITD	19.103	-61.3491
MLL_22509	MLL-Stranded_total_RNA_PE100bp	NoFusion	T-ALL	T-ALL	TLX1	notETP	no-ITD	90.4451	-6.79142
MLL_22599	MLL-Stranded_total_RNA_PE100bp	NoFusion	T-ALL	T-ALL	T-other	notETP	no-ITD	18.9614	-60.1111
MLL_22610	MLL-Stranded_total_RNA_PE100bp	TAL1-TCRA	T-ALL	T-ALL	TAL1	notETP	no-ITD	-2.77042	-47.2014
MLL_22613	MLL-Stranded_total_RNA_PE100bp	NoFusion	T-ALL	T-ALL	TLX3	notETP	no-ITD	82.0206	13.9119
MLL_22616	MLL-Stranded_total_RNA_PE100bp	NoFusion	T-ALL	T-ALL	TLX1	notETP	no-ITD	93.1739	-11.994
MLL_22712	MLL-Stranded_total_RNA_PE100bp	NoFusion	T-ALL	T-ALL	T-other	notETP	no-ITD	-16.0029	-17.0069
MLL_22737	MLL-Stranded_total_RNA_PE100bp	TLX1-TCRA;SMAD7-DYM	T-ALL	T-ALL	TLX1	notETP	no-ITD	91.9582	-0.592889
MLL_22747	MLL-Stranded_total_RNA_PE100bp	NoFusion	T-ALL	T-ALL	T-other	notETP	no-ITD	13.9033	-80.7767
MLL_23001	MLL-Stranded_total_RNA_PE100bp	TLX1-TCRA	T-ALL	T-ALL	TLX1	notETP	no-ITD	10.1177	-50.3547
MLL_23002	MLL-Stranded_total_RNA_PE100bp	NoFusion	T-ALL	T-ALL	T-other	notETP	no-ITD	20.8267	-59.5207
MLL_23003	MLL-Stranded_total_RNA_PE100bp	SET-NUP214	T-ALL	T-ALL	SET-NUP214	ETP	no-ITD	-1.4303	-8.19768
MLL_23111	MLL-Stranded_total_RNA_PE100bp	NCOA6-SPDEF	T-ALL	T-ALL	T-other	notETP	no-ITD	-0.551937	-77.9069
MLL_23112	MLL-Stranded_total_RNA_PE100bp	TCF7-VDAC1	T-ALL	T-ALL	TLX1	notETP	no-ITD	91.9297	-13.1127
MLL_23190	MLL-Stranded_total_RNA_PE100bp	NoFusion	T-ALL	T-ALL	T-other	ETP	no-ITD	-3.86646	45.1587
MLL_23199	MLL-Stranded_total_RNA_PE100bp	NoFusion	T-ALL	T-ALL	T-other	notETP	no-ITD(IGV)	35.1703	35.6061
MLL_23211	MLL-Stranded_total_RNA_PE100bp	NoFusion	T-ALL	T-ALL	T-other	notETP	no-ITD	-40.1092	-69.6362
MLL_29452	MLL-Stranded_total_RNA_PE100bp	NoFusion	T-ALL	T-ALL	T-other	notETP	no-ITD	-29.8216	-43.8067
MLL_30391	MLL-Stranded_total_RNA_PE100bp	GPBP1-RPS23	T-ALL	T-ALL	T-other	ETP	no-ITD	18.4539	48.2291
MLL_30903	MLL-Stranded_total_RNA_PE100bp	NoFusion	T-ALL	T-ALL	T-other	notETP	no-ITD	1.13059	-9.82766
MLL_31780	MLL-Stranded_total_RNA_PE100bp	NUP98-RAP1GDS1	T-ALL	T-ALL	NUP98	notETP	no-ITD	36.5956	-8.82666
MLL_31964	MLL-Stranded_total_RNA_PE100bp	NKX2-3-TRB	T-ALL	T-ALL	NKX2_1	ETP	no-ITD	-26.3454	44.8324
MLL_41580	MLL-Stranded_total_RNA_PE100bp	NoFusion	T-ALL	T-ALL	T-other	notETP	no-ITD	-18.5084	-13.1251
MLL_51521	MLL-Stranded_total_RNA_PE100bp	SET-NUP214;TRG-MLLT10	T-ALL	T-ALL	SET-NUP214	notETP	no-ITD	0.142126	-8.26643
MLL_52968	MLL-Stranded_total_RNA_PE100bp	TCRA-TLX1	T-ALL	T-ALL	TLX1	notETP	no-ITD	78.6925	-25.6675
MLL_54448	MLL-Stranded_total_RNA_PE100bp	STIL-TAL1	T-ALL	T-ALL	TAL1	ETP	no-ITD	2.3642	-58.8806
MLL_54462	MLL-Stranded_total_RNA_PE100bp	LEF1-TRA;HBS1L-AHI1	T-ALL	T-ALL	T-other	notETP	no-ITD	-8.00137	-94.6552
MLL_54465	MLL-Stranded_total_RNA_PE100bp	DDX3X-MLLT10	T-ALL	T-ALL	DDX3X-MLLT10	notETP	no-ITD	36.8318	-5.44921
MLL_54466	MLL-Stranded_total_RNA_PE100bp	NoFusion	T-ALL	T-ALL	TLX3	notETP	no-ITD	60.5719	24.2694
MLL_54966	MLL-Stranded_total_RNA_PE100bp	NoFusion	T-ALL	T-ALL	T-other	ETP	no-ITD	-6.71294	-5.45137
SJALL068283_D1	MLL-Stranded_total_RNA_PE100bp	CCDC26-BCL11B	T-ALL	T-ALL	BCL11B	ETP	ITD	-23.0588	97.4104
MLL_00207	MLL-Stranded_total_RNA_PE100bp	PICALM-MLLT10	MPAL	MPAL(T/M)	PICALM-MLLT10	MPAL	no-ITD	6.8612	71.9208
SJMPAL068274_D1	MLL-Stranded_total_RNA_PE100bp	BCL11B enh amp	MPAL	MPAL(T/M)	BCL11B	MPAL	ITD	-28.3123	107.305
SJMPAL068275_D1	MLL-Stranded_total_RNA_PE100bp	CCDC26-BCL11B	MPAL	MPAL(T/M)	BCL11B	MPAL	ITD	-24.1806	101.595
MLL_11985	MLL-Stranded_total_RNA_PE100bp	NoFusion	MPAL	MPAL(T/M)	MPAL-other	MPAL	no-ITD	-35.3743	49.3524
MLL_11986	MLL-Stranded_total_RNA_PE100bp	NoFusion	MPAL	MPAL(T/M)	MPAL-other	MPAL	no-ITD	-32.1024	38.2332
MLL_11987	MLL-Stranded_total_RNA_PE100bp	NoFusion	MPAL	MPAL(T/M)	MPAL-other	MPAL	no-ITD	9.51376	38.9984
SJMPAL068276_D1	MLL-Stranded_total_RNA_PE100bp	CCDC26-BCL11B	MPAL	MPAL(T/M)	BCL11B	MPAL	ITD	-29.8474	108.439
MLL_11989	MLL-Stranded_total_RNA_PE100bp	NoFusion	MPAL	MPAL(T/M)	MPAL-other	MPAL	no-ITD	11.2716	40.3363
MLL_11991	MLL-Stranded_total_RNA_PE100bp	NoFusion	MPAL	MPAL(T/M)	MPAL-other	MPAL	no-ITD	-8.53832	43.14
MLL_12406	MLL-Stranded_total_RNA_PE100bp	NoFusion	MPAL	MPAL(B/M)	MPAL-other	MPAL	no-ITD	-34.5014	36.3462
MLL_12436	MLL-Stranded_total_RNA_PE100bp	NoFusion	MPAL	MPAL(B/M?)	MPAL-other	MPAL	no-ITD	-27.899	59.5894
MLL_12437	MLL-Stranded_total_RNA_PE100bp	NoFusion	MPAL	MPAL(B/M?)	MPAL-other	MPAL	no-ITD	-35.5227	42.1478
MLL_12591	MLL-Stranded_total_RNA_PE100bp	RUNX1-RUNX1T1	MPAL	MPAL(B/M?)	RUNX1-RUNX1T1	MPAL	ITD	-63.2494	61.362
SJMPAL068278_D1	MLL-Stranded_total_RNA_PE100bp	CCDC26-BCL11B	MPAL	MPAL(T/M)	BCL11B	MPAL	TKD	-25.4123	99.3711
SJMPAL068282_D1	MLL-Stranded_total_RNA_PE100bp	BCL11B-ARID1B	MPAL	MPAL(T/M)	BCL11B	MPAL	no-ITD	-25.6954	101.891
MLL_46386	MLL-Stranded_total_RNA_PE100bp	NoFusion	MPAL	MPAL(T/M)	MPAL-other	MPAL	no-ITD	-2.23428	45.2014
SJMPAL068284_D1	MLL-Stranded_total_RNA_PE100bp	CCDC26-BCL11B	MPAL	MPAL(T/M)	BCL11B	MPAL	ITD	-26.0193	108.904
SJMPAL068285_D1	MLL-Stranded_total_RNA_PE100bp	BCL11B-ARID1B	MPAL	MPAL(T/M)	BCL11B	MPAL	no-ITD	-27.7738	97.9227
MLL_57544	MLL-Stranded_total_RNA_PE100bp	NoFusion	MPAL	MPAL(T/M)	MPAL-other	MPAL	no-ITD	-32.5804	40.4143
SJMPAL068286_D1	MLL-Stranded_total_RNA_PE100bp	CCDC26-BCL11B	MPAL	MPAL(T/M)	BCL11B	MPAL	ITD	-30.1893	106.421
TALL001	TALL-JP-Stranded_total_RNA_PE100bp	NoFusion	T-ALL	T-ALL	TLX3	notETP	no-ITD	81.1207	20.7974
TALL002	TALL-JP-Stranded_total_RNA_PE100bp	NoFusion(TAL1-ins)	T-ALL	T-ALL	TAL1	notETP	no-ITD	13.3107	-94.3413
TALL006	TALL-JP-Stranded_total_RNA_PE100bp	NoFusion	T-ALL	T-ALL	TLX3	notETP	no-ITD	85.4436	3.03351
TALL007	TALL-JP-Stranded_total_RNA_PE100bp	STIL-TAL1	T-ALL	T-ALL	TAL1	notETP	no-ITD	-46.1691	-98.0543
TALL008	TALL-JP-Stranded_total_RNA_PE100bp	NoFusion	T-ALL	T-ALL	TLX1	notETP	no-ITD	79.8155	-1.07875
TALL009	TALL-JP-Stranded_total_RNA_PE100bp	NoFusion	T-ALL	T-ALL	TLX3	notETP	no-ITD	82.0953	18.8133
TALL010	TALL-JP-Stranded_total_RNA_PE100bp	STIL-TAL1;HDAC4-GHR	T-ALL	T-ALL	TAL1	notETP	no-ITD	16.8341	-94.016
TALL013	TALL-JP-Stranded_total_RNA_PE100bp	NoFusion	T-ALL	T-ALL	T-other	notETP	no-ITD	10.8511	-100.064
TALL014	TALL-JP-Stranded_total_RNA_PE100bp	NoFusion	T-ALL	T-ALL	T-other	notETP	no-ITD	-7.91676	53.4725
TALL015	TALL-JP-Stranded_total_RNA_PE100bp	NoFusion	T-ALL	T-ALL	T-other	notETP	no-ITD	16.9578	-91.8428
TALL017	TALL-JP-Stranded_total_RNA_PE100bp	NoFusion	T-ALL	T-ALL	T-other	notETP	no-ITD	22.9995	-77.7144
TALL019	TALL-JP-Stranded_total_RNA_PE100bp	NoFusion	T-ALL	T-ALL	T-other	notETP	no-ITD	15.5212	62.4971
TALL020	TALL-JP-Stranded_total_RNA_PE100bp	STIL-TAL1	T-ALL	T-ALL	TAL1	notETP	no-ITD	-36.7499	-95.5004
TALL025	TALL-JP-Stranded_total_RNA_PE100bp	NoFusion	T-ALL	T-ALL	TLX3	notETP	no-ITD	83.0543	31.5111
TALL032	TALL-JP-Stranded_total_RNA_PE100bp	NoFusion	T-ALL	T-ALL	TLX3	notETP	no-ITD	64.4032	34.3998
TALL033	TALL-JP-Stranded_total_RNA_PE100bp	NUP214-ABL1	T-ALL	T-ALL	TLX3	notETP	no-ITD	70.2943	27.3195
TALL035	TALL-JP-Stranded_total_RNA_PE100bp	NoFusion	T-ALL	T-ALL	T-other	notETP	no-ITD	17.8657	63.6433
TALL036	TALL-JP-Stranded_total_RNA_PE100bp	NoFusion	T-ALL	T-ALL	T-other	notETP	no-ITD	5.16693	-69.8392
TALL037	TALL-JP-Stranded_total_RNA_PE100bp	NoFusion	T-ALL	T-ALL	T-other	notETP	no-ITD	7.52087	-87.13
TALL038	TALL-JP-Stranded_total_RNA_PE100bp	NoFusion	T-ALL	T-ALL	T-other	notETP	no-ITD	3.37253	-93.2679
TALL040	TALL-JP-Stranded_total_RNA_PE100bp	NoFusion	T-ALL	T-ALL	TLX3	notETP	no-ITD	69.7773	32.4818
TALL042	TALL-JP-Stranded_total_RNA_PE100bp	NoFusion	T-ALL	T-ALL	T-other	notETP	no-ITD	35.5352	45.0396
TALL045	TALL-JP-Stranded_total_RNA_PE100bp	NoFusion	T-ALL	T-ALL	T-other	notETP	no-ITD	-47.343	-81.3661
TALL046	TALL-JP-Stranded_total_RNA_PE100bp	STIL-TAL1	T-ALL	T-ALL	TAL1	notETP	no-ITD	-45.2331	-83.4235
TALL047	TALL-JP-Stranded_total_RNA_PE100bp	NoFusion	T-ALL	T-ALL	TLX1	notETP	no-ITD	96.4035	-2.63341
TALL048	TALL-JP-Stranded_total_RNA_PE100bp	STIL-TAL1	T-ALL	T-ALL	TAL1	notETP	no-ITD	-40.0715	-86.1476
TALL049	TALL-JP-Stranded_total_RNA_PE100bp	NoFusion	T-ALL	T-ALL	TLX3	notETP	no-ITD	90.6006	5.77409
TALL050	TALL-JP-Stranded_total_RNA_PE100bp	NoFusion(TAL1-ins)	T-ALL	T-ALL	TAL1	notETP	no-ITD	-23.3428	-80.4583
TALL051	TALL-JP-Stranded_total_RNA_PE100bp	CBFA2T3-ACSF3	T-ALL	T-ALL	T-other	notETP	no-ITD	-42.3633	-85.8344
TALL053	TALL-JP-Stranded_total_RNA_PE100bp	STIL-TAL1	T-ALL	T-ALL	TAL1	notETP	no-ITD	-34.1287	-85.6378
TALL056	TALL-JP-Stranded_total_RNA_PE100bp	NoFusion(TAL1-ins)	T-ALL	T-ALL	TAL1	notETP	no-ITD	-7.52306	-51.9794
TALL057	TALL-JP-Stranded_total_RNA_PE100bp	STIL-TAL1	T-ALL	T-ALL	TAL1	notETP	no-ITD	-45.8685	-80.2283
TALL062	TALL-JP-Stranded_total_RNA_PE100bp	NoFusion(TAL1-ins)	T-ALL	T-ALL	TAL1	notETP	no-ITD	-9.19273	-53.3681
TALL066	TALL-JP-Stranded_total_RNA_PE100bp	TLX1NB-TCRD	T-ALL	T-ALL	TLX1	notETP	no-ITD	81.4535	-8.40715
TALL067	TALL-JP-Stranded_total_RNA_PE100bp	NUP214-ABL1;NF1-PSMD11	T-ALL	T-ALL	TLX3	notETP	no-ITD	67.1827	32.7329
TALL068	TALL-JP-Stranded_total_RNA_PE100bp	NoFusion	T-ALL	T-ALL	TLX3	notETP	no-ITD	80.6978	25.7569
TALL071	TALL-JP-Stranded_total_RNA_PE100bp	SEC16A-NOTCH1	T-ALL	T-ALL	T-other	notETP	no-ITD	-49.1627	-95.8979
TALL075	TALL-JP-Stranded_total_RNA_PE100bp	NoFusion	T-ALL	T-ALL	TLX1	notETP	no-ITD	81.6714	-15.7605
TALL076	TALL-JP-Stranded_total_RNA_PE100bp	NoFusion	T-ALL	T-ALL	T-other	notETP	no-ITD	32.7787	48.6423
TALL078	TALL-JP-Stranded_total_RNA_PE100bp	NoFusion	T-ALL	T-ALL	T-other	notETP	no-ITD	21.1499	40.4112
TALL079	TALL-JP-Stranded_total_RNA_PE100bp	RUNX1-EVX1	T-ALL	T-ALL	T-other	notETP	no-ITD	12.2419	65.4975
TALL_VC003	TALL-JP-Stranded_total_RNA_PE100bp	NoFusion	T-ALL	T-ALL	T-other	notETP	no-ITD	-9.76774	-86.8427
TALL_VC014	TALL-JP-Stranded_total_RNA_PE100bp	NoFusion	T-ALL	T-ALL	TLX3	notETP	no-ITD	79.2788	34.655
TALL_VC020	TALL-JP-Stranded_total_RNA_PE100bp	STIL-TAL1	T-ALL	T-ALL	TAL1	notETP	no-ITD	-26.3234	-78.0877
TALL_VC023	TALL-JP-Stranded_total_RNA_PE100bp	STIL-TAL1;SEC16A-NOTCH1	T-ALL	T-ALL	TAL1	notETP	no-ITD	-31.4513	-91.2507
TALL_VC050	TALL-JP-Stranded_total_RNA_PE100bp	NoFusion	T-ALL	T-ALL	T-other	notETP	no-ITD	15.3951	27.2798
TALL_VC062	TALL-JP-Stranded_total_RNA_PE100bp	NoFusion	T-ALL	T-ALL	T-other	notETP	no-ITD	-14.4554	-91.777
TALL_VC068	TALL-JP-Stranded_total_RNA_PE100bp	CREBRF-AK7	T-ALL	T-ALL	TLX3	notETP	no-ITD	80.103	30.0709
TALL_VC069	TALL-JP-Stranded_total_RNA_PE100bp	NoFusion	T-ALL	T-ALL	TLX3	notETP	no-ITD	84.579	5.63255
TALL_VC070	TALL-JP-Stranded_total_RNA_PE100bp	NoFusion	T-ALL	T-ALL	T-other	notETP	no-ITD	-34.7636	-101.539
TALL_VC075	TALL-JP-Stranded_total_RNA_PE100bp	STIL-TAL1	T-ALL	T-ALL	TAL1	notETP	no-ITD	2.6958	-65.7135
TALL_VC086	TALL-JP-Stranded_total_RNA_PE100bp	NoFusion	T-ALL	T-ALL	T-other	notETP	no-ITD	-32.7454	-101.699
TALL_VC088	TALL-JP-Stranded_total_RNA_PE100bp	NoFusion(TAL1-ins)	T-ALL	T-ALL	TAL1	notETP	no-ITD	0.407839	-66.2505
TALL_VC091	TALL-JP-Stranded_total_RNA_PE100bp	STIL-TAL1	T-ALL	T-ALL	TAL1	notETP	no-ITD	-36.5982	-101.33
TALL_VC092	TALL-JP-Stranded_total_RNA_PE100bp	PICALM-MLLT10	T-ALL	T-ALL	PICALM-MLLT10	notETP	no-ITD	8.30403	65.3009
TALL_VC093	TALL-JP-Stranded_total_RNA_PE100bp	NoFusion	T-ALL	T-ALL	TLX3	notETP	no-ITD	76.6218	29.4051
TALL_VC094	TALL-JP-Stranded_total_RNA_PE100bp	STIL-TAL1	T-ALL	T-ALL	TAL1	notETP	no-ITD	12.1195	-92.0892
TALL_VC096	TALL-JP-Stranded_total_RNA_PE100bp	CTCF-SLC7A6	T-ALL	T-ALL	TLX3	notETP	no-ITD	77.812	26.9154
TALL_VC099	TALL-JP-Stranded_total_RNA_PE100bp	NoFusion	T-ALL	T-ALL	NKX2_1	notETP	no-ITD	50.1766	-55.9087
TALL_VC103	TALL-JP-Stranded_total_RNA_PE100bp	NoFusion	T-ALL	T-ALL	TLX3	notETP	no-ITD	66.6579	30.141
TALL_VC104	TALL-JP-Stranded_total_RNA_PE100bp	STIL-TAL1	T-ALL	T-ALL	TAL1	notETP	no-ITD	-48.1151	-91.21
TALL004	TALL-JP-Stranded_total_RNA_PE100bp	FGFR1OP-FGFR1	T-ALL	T-ALL	T-other	notETP	no-ITD	-49.432	9.05272
TALL_VC087	TALL-JP-Stranded_total_RNA_PE100bp	NKX2-1-AS1-TCRD	T-ALL	T-ALL	NKX2_1	notETP	no-ITD	-5.70806	-24.4878
TALL011	TALL-JP-Stranded_total_RNA_PE100bp	KMT2A-MLLT1	T-ALL	T-ALL	KMT2A	notETP	no-ITD	24.4934	-16.7796
TALL055	TALL-JP-Stranded_total_RNA_PE100bp	KMT2A-MLLT1	T-ALL	T-ALL	KMT2A	notETP	no-ITD	8.93062	-17.6268
TALL063	TALL-JP-Stranded_total_RNA_PE100bp	STIL-TAL1	T-ALL	T-ALL	TAL1	notETP	no-ITD	-21.1706	-40.9955
TALL_VC025	TALL-JP-Stranded_total_RNA_PE100bp	NoFusion	T-ALL	T-ALL	T-other	notETP	no-ITD	24.3796	-63.1269
TALL_VC058	TALL-JP-Stranded_total_RNA_PE100bp	KMT2A-MLLT1	T-ALL	T-ALL	KMT2A	notETP	no-ITD	20.7531	-9.19065
TALL_VC084	TALL-JP-Stranded_total_RNA_PE100bp	KMT2A-MLLT1	T-ALL	T-ALL	KMT2A	notETP	no-ITD	24.2431	-14.271
TALL003	TALL-JP-Stranded_total_RNA_PE100bp	NoFusion	T-ALL	T-ALL	T-other	notETP	no-ITD	-18.8969	36.7041
TALL023	TALL-JP-Stranded_total_RNA_PE100bp	STMN1-SPI1	T-ALL	T-ALL	SPI1	notETP	no-ITD	-60.4778	118.173
TALL027	TALL-JP-Stranded_total_RNA_PE100bp	TCF7-SPI1	T-ALL	T-ALL	SPI1	notETP	no-ITD	-60.0972	116.528
TALL028	TALL-JP-Stranded_total_RNA_PE100bp	STMN1-SPI1	T-ALL	T-ALL	SPI1	notETP	no-ITD	-59.3556	119.902
TALL041	TALL-JP-Stranded_total_RNA_PE100bp	TCF7-SPI1	T-ALL	T-ALL	SPI1	notETP	no-ITD	-57.1132	118.297
TALL059	TALL-JP-Stranded_total_RNA_PE100bp	TCF7-SPI1	T-ALL	T-ALL	SPI1	notETP	no-ITD	-58.6731	115.072
TALL060	TALL-JP-Stranded_total_RNA_PE100bp	TCF7-SPI1	T-ALL	T-ALL	SPI1	notETP	no-ITD	-57.4451	115.958
TALL081	TALL-JP-Stranded_total_RNA_PE100bp	NoFusion	T-ALL	T-ALL	nonTCR-LMO2	notETP	no-ITD	29.9463	-37.2611
TALL_VC005	TALL-JP-Stranded_total_RNA_PE100bp	NoFusion	T-ALL	T-ALL	T-other	notETP	no-ITD	-17.929	36.7561
TALL_VC065	TALL-JP-Stranded_total_RNA_PE100bp	KMT2A-MLLT6	T-ALL	T-ALL	KMT2A	notETP	no-ITD	20.0959	-2.66363
TALL_VC090	TALL-JP-Stranded_total_RNA_PE100bp	KMT2A-TNRC18	T-ALL	T-ALL	KMT2A	notETP	no-ITD	10.5565	28.0762
TALL016	TALL-JP-Stranded_total_RNA_PE100bp	NoFusion	T-ALL	T-ALL	T-other	notETP	no-ITD	31.0286	39.6597
TALL024	TALL-JP-Stranded_total_RNA_PE100bp	NoFusion(TAL1-ins)	T-ALL	T-ALL	TAL1	notETP	no-ITD	12.2165	-60.4284
TALL054	TALL-JP-Stranded_total_RNA_PE100bp	NoFusion	T-ALL	T-ALL	T-other	notETP	no-ITD	-3.22666	-64.1702
TALL077	TALL-JP-Stranded_total_RNA_PE100bp	BCL11B-NKX2-5;STIL-TAL1	T-ALL	T-ALL	T-other	notETP	no-ITD	45.1836	-58.6418
TALL_VC076	TALL-JP-Stranded_total_RNA_PE100bp	STIL-TAL1	T-ALL	T-ALL	TAL1	notETP	no-ITD	-25.1246	-81.0531
TALL044	TALL-JP-Stranded_total_RNA_PE100bp	PICALM-MLLT10	T-ALL	T-ALL	PICALM-MLLT10	notETP	no-ITD	40.5458	-0.897896
TALL_VC011	TALL-JP-Stranded_total_RNA_PE100bp	NIPBL-ETV6	T-ALL	T-ALL	T-other	notETP	no-ITD	-12.8867	69.7446
TALL030	TALL-JP-Stranded_total_RNA_PE100bp	NoFusion	T-ALL	T-ALL	T-other	notETP	no-ITD	-14.7073	63.7649
TALL039	TALL-JP-Stranded_total_RNA_PE100bp	NoFusion	T-ALL	T-ALL	T-other	notETP	no-ITD	-11.695	-41.365
TALL064	TALL-JP-Stranded_total_RNA_PE100bp	RUNX1-AFF3	T-ALL	T-ALL	T-other	notETP	no-ITD	-10.0908	67.5292
TALL_VC013	TALL-JP-Stranded_total_RNA_PE100bp	STIL-TAL1	T-ALL	T-ALL	TAL1	notETP	no-ITD	-11.757	-42.8765
TALL_VC078	TALL-JP-Stranded_total_RNA_PE100bp	MLLT10-PICALM	T-ALL	T-ALL	PICALM-MLLT10	notETP	no-ITD	20.7442	51.3072
TALL_VC080	TALL-JP-Stranded_total_RNA_PE100bp	NoFusion	T-ALL	T-ALL	T-other	notETP	no-ITD	-10.0463	59.0578
TALL_VC081	TALL-JP-Stranded_total_RNA_PE100bp	MLLT10-PICALM	T-ALL	T-ALL	PICALM-MLLT10	notETP	no-ITD	25.156	8.97814
TALL_VC101	TALL-JP-Stranded_total_RNA_PE100bp	NoFusion	T-ALL	T-ALL	T-other	notETP	no-ITD	-10.0028	62.2462
TALL061	TALL-JP-Stranded_total_RNA_PE100bp	NoFusion	T-ALL	T-ALL	T-other	notETP	no-ITD	-11.1701	56.6716
TALL074	TALL-JP-Stranded_total_RNA_PE100bp	STIL-TAL1	T-ALL	T-ALL	TAL1	notETP	no-ITD	-16.7993	-44.6144
TALL072	TALL-JP-Stranded_total_RNA_PE100bp	NoFusion	T-ALL	T-ALL	T-other	notETP	no-ITD	-12.4216	-31.8733
TALL080	TALL-JP-Stranded_total_RNA_PE100bp	SFPQ-ZFP36L1	T-ALL	T-ALL	T-other	notETP	no-ITD	-14.3379	52.3583
TALL_VC073	TALL-JP-Stranded_total_RNA_PE100bp	NoFusion	T-ALL	T-ALL	T-other	notETP	no-ITD	4.25011	-45.0026
TALL_VC102	TALL-JP-Stranded_total_RNA_PE100bp	STIL-TAL1	T-ALL	T-ALL	TAL1	ETP	no-ITD	-5.34429	-45.7925
TALL_VC059	TALL-JP-Stranded_total_RNA_PE100bp	NoFusion	T-ALL	T-ALL	T-other	notETP	no-ITD	-8.52278	-22.9409
TALL_VC095	TALL-JP-Stranded_total_RNA_PE100bp	SET-NUP214	T-ALL	T-ALL	SET-NUP214	notETP	no-ITD	51.3093	-3.84692
TALL_VC105	TALL-JP-Stranded_total_RNA_PE100bp	NoFusion	T-ALL	T-ALL	T-other	notETP	no-ITD	6.95271	-21.2004
SJMPAL003414_D2	Stranded_total_RNA_PE100bp	PCM1-FGFR1	MPAL	MPAL(T/M)	TLX3	MPAL	no-ITD	62.7369	43.3042
SJMPAL011912_D1	Stranded_total_RNA_PE100bp	NoFusion	MPAL	MPAL(T/M)	BCL11B	MPAL	ITD	-37.8251	107.17
SJMPAL011913_D1	Stranded_total_RNA_PE100bp	BCL11B (Del);FNDC3B-NAALADL2	MPAL	MPAL(T/M)	BCL11B	MPAL	ITD	-33.6822	113.872
SJMPAL011914_D1	Stranded_total_RNA_PE100bp	CDK6-BCL11B	MPAL	MPAL(T/M)	BCL11B	MPAL	ITD	-35.1557	112.603
SJMPAL011915_D1	Stranded_total_RNA_PE100bp	ZEB2-BCL11B;RUNX1-CRNDE;ERLIN1-RUNX1	MPAL	MPAL(T/M)	BCL11B	MPAL	ITD	-34.7099	115.446
SJMPAL012417_D1	Stranded_total_RNA_PE100bp	DDX3X-MLLT10;CENPE-PPP3CA	MPAL	MPAL(NOS (T/B/M))	DDX3X-MLLT10	MPAL	no-ITD	-19.4305	60.4024
SJMPAL012418_D1	Stranded_total_RNA_PE100bp	KMT2A-TET1;TASP1-PDCD6IP	MPAL	MPAL(KMT2A)	KMT2A	MPAL	no-ITD	-23.2382	60.5044
SJMPAL012420_D1	Stranded_total_RNA_PE100bp	ZEB2-BCL11B	MPAL	MPAL(T/M)	BCL11B	MPAL	ITD	-37.5183	109.158
SJMPAL012421_DT	Stranded_total_RNA_PE75bp	BCL11B-ARID1B	MPAL	MPAL(T/M)	BCL11B	MPAL	ITD	-16.2347	102.328
SJMPAL016340_D1	Stranded_total_RNA_PE100bp	NUP214-ABL1	MPAL	MPAL(T/M)	MPAL-other	MPAL	no-ITD	-11.7706	53.5425
SJMPAL016341_DT	Stranded_total_RNA_PE75bp	BCL11B-ARID1B	MPAL	MPAL(T/M)	BCL11B	MPAL	no-ITD	-16.2063	107.648
SJMPAL016342_DT	Stranded_total_RNA_PE75bp	EWSR1-FEV	MPAL	MPAL(T/M)	MPAL-other	MPAL	no-ITD	-16.5185	8.3876
SJMPAL016343_D1	Stranded_total_RNA_PE100bp	ETV6-NCOA2	MPAL	MPAL(T/M)	MPAL-other	MPAL	no-ITD	-12.6878	68.5142
SJMPAL016344_D1	Stranded_total_RNA_PE100bp	NoFusion	MPAL	MPAL(T/M)	TLX3	MPAL	no-ITD	59.6913	41.9455
SJMPAL016447_D1	Stranded_total_RNA_PE100bp	SET-NUP214	MPAL	MPAL(T/M)	SET-NUP214	MPAL	no-ITD	-6.7008	61.8805
SJMPAL016849_DT	Stranded_total_RNA_PE75bp	PICALM-MLLT10	MPAL	MPAL(T/M)	PICALM-MLLT10	MPAL	no-ITD	-1.23672	-11.1393
SJMPAL016855_DT	Stranded_total_RNA_PE75bp	NoFusion	MPAL	MPAL(B/M)	MPAL-other	MPAL	no-ITD	-13.164	-8.02681
SJMPAL017975_DT	Stranded_total_RNA_PE75bp	NoFusion	MPAL	MPAL(B/M)	MPAL-other	MPAL	no-ITD	-66.6649	67.5497
SJMPAL017978_D1	Stranded_total_RNA_PE100bp	ETV6-NCOA2	MPAL	MPAL(T/M)	MPAL-other	MPAL	no-ITD	-10.0975	73.1192
SJMPAL022667_D1	Stranded_total_RNA_PE100bp	MNX1-IKZF1;IKZF1-TMBIM7P;EXOC4-PEG10	MPAL	MPAL(T/M)	MPAL-other	MPAL	no-ITD	-16.8623	28.0644
SJMPAL040027_D1	Stranded_total_RNA_PE100bp	NoFusion	MPAL	MPAL(T/M)	MPAL-other	MPAL	ITD	-32.234	66.4928
SJMPAL040030_D1	Stranded_total_RNA_PE100bp	ERG-HNRNPH1	MPAL	MPAL(B/M)	MPAL-other	MPAL	no-ITD	-25.1027	63.5312
SJMPAL040035_D1	Stranded_total_RNA_PE100bp	KMT2A-MLLT3	MPAL	MPAL(KMT2A)	KMT2A	MPAL	no-ITD	-77.375	17.5501
SJMPAL040036_D1	Stranded_total_RNA_PE100bp	NoFusion	MPAL	MPAL(T/M)	MPAL-other	MPAL	no-ITD	-21.7521	-13.6188
SJMPAL040459_DT	Stranded_total_RNA_PE75bp	BCL11B enh amp	MPAL	MPAL(T/M)	BCL11B	MPAL	ITD	-18.8018	103.201
SJMPAL041119_DT	Stranded_total_RNA_PE75bp	NoFusion	MPAL	MPAL(B/M)	MPAL-other	MPAL	no-ITD	-15.963	9.2373
SJMPAL041120_D1	Stranded_total_RNA_PE100bp	SET-NUP214	MPAL	MPAL(B/M)	SET-NUP214	MPAL	no-ITD	-4.9524	64.1948
SJMPAL042787_DT	Stranded_total_RNA_PE75bp	NoFusion	MPAL	MPAL(NOS (T/B))	MPAL-other	MPAL	no-ITD	25.4037	21.1956
SJMPAL042790_D1	Stranded_total_RNA_PE100bp	NoFusion	MPAL	MPAL(B/M)	MPAL-other	MPAL	no-ITD	-60.4476	19.464
SJMPAL042791_DT	Stranded_total_RNA_PE75bp	BCL11B enh amp	MPAL	MPAL(T/M)	BCL11B	MPAL	ITD	-17.4624	104.296
SJMPAL042792_D1	Stranded_total_RNA_PE100bp	ZEB2-BCL11B;CUX1-MARK3;ANKRD11-CUX1	MPAL	MPAL(T/M)	BCL11B	MPAL	ITD	-31.5425	117.426
SJMPAL042793_DT	Stranded_total_RNA_PE75bp	BCL11B-ARID1B	MPAL	MPAL(T/M)	BCL11B	MPAL	ITD	-19.8905	104.097
SJMPAL042794_DT	Stranded_total_RNA_PE75bp	BCL11B-ARID1B	MPAL	MPAL(T/M)	BCL11B	MPAL	TKD	-18.0432	105.903
SJMPAL042796_D1	Stranded_total_RNA_PE100bp	NoFusion	MPAL	MPAL(T/M)	MPAL-other	MPAL	no-ITD	-35.8572	65.9831
SJMPAL042797_D1	Stranded_total_RNA_PE100bp	ETV6-MAML3	MPAL	MPAL(T/M)	MPAL-other	MPAL	no-ITD	-10.6237	70.0454
SJMPAL042798_DT	Stranded_total_RNA_PE75bp	NoFusion	MPAL	MPAL(NOS (T/B/M))	MPAL-other	MPAL	no-ITD	-22.31	3.18798
SJMPAL042799_DT	Stranded_total_RNA_PE75bp	NoFusion	MPAL	MPAL(NOS (T/B/M))	MPAL-other	MPAL	no-ITD	13.3121	-69.9956
SJMPAL042801_DT	Stranded_total_RNA_PE75bp	NoFusion	MPAL	MPAL(T/M)	MPAL-other	MPAL	no-ITD	9.95636	36.6213
SJMPAL042946_DT	Stranded_total_RNA_PE75bp	CRBN-GABRB2	MPAL	MPAL(NOS (T/B))	MPAL-other	MPAL	no-ITD	25.8131	22.4177
SJMPAL043505_DT	Stranded_total_RNA_PE75bp	ETV6-FOXO1	MPAL	MPAL(T/M)	MPAL-other	MPAL	no-ITD	4.16761	45.4122
SJMPAL043509_D1	Stranded_total_RNA_PE100bp	BCL11B-ARID1B	MPAL	MPAL(T/M)	BCL11B	MPAL	no-ITD	-35.333	103.175
SJMPAL043510_D1	Stranded_total_RNA_PE100bp	NoFusion	MPAL	MPAL(T/M)	MPAL-other	MPAL	no-ITD	17.2291	65.4788
SJMPAL043511_DT	Stranded_total_RNA_PE75bp	TRIM24-FGFR1	MPAL	MPAL(NOS (T/B))	MPAL-other	MPAL	no-ITD	-12.9756	-10.1787
SJMPAL043514_D1	Stranded_total_RNA_PE100bp	ETV6-ARNT	MPAL	MPAL(T/M)	MPAL-other	MPAL	no-ITD	3.04875	75.3269
SJMPAL043768_DT	Stranded_total_RNA_PE75bp	MNX1-ETV6	MPAL	MPAL(AUL)	MPAL-other	MPAL	no-ITD	-6.9819	15.5744
SJMPAL043769_DT	Stranded_total_RNA_PE75bp	SET-NUP214	MPAL	MPAL(AUL)	SET-NUP214	MPAL	no-ITD	20.6927	31.623
SJMPAL043771_DT	Stranded_total_RNA_PE75bp	NoFusion	MPAL	MPAL(B/M)	MPAL-other	MPAL	no-ITD	-52.1128	12.1652
SJMPAL043773_DT	Stranded_total_RNA_PE75bp	CDK6-HOXA11-AS	MPAL	MPAL(T/M)	HOXA	MPAL	no-ITD	-1.1486	20.2481
SJMPAL044948_D1	Stranded_total_RNA_PE100bp	LIN28B-AMPH	MPAL	MPAL(T/M)	MPAL-other	MPAL	no-ITD	-41.0355	-15.3791
SJMPAL044949_D1	Stranded_total_RNA_PE100bp	NoFusion	MPAL	MPAL(NOS (T/B))	TLX3	MPAL	no-ITD	86.5614	23.8962
SJMPAL044953_D1	Stranded_total_RNA_PE100bp	NoFusion	MPAL	MPAL(T/M)	BCL11B	MPAL	ITD	-34.2983	107.581
SJAML003320_D2	Stranded_total_RNA_PE100bp	KMT2A-MLLT1;TASP1-PDCD6IP	AML	AML	KMT2A	AML	no-ITD	-72.5865	16.9984
SJAML003322_D2	Stranded_total_RNA_PE100bp	KMT2A-MLLT10;FDX1-KMT2A;SNRK-CACNA2D3	AML	AML	KMT2A	AML	no-ITD	-75.0005	16.6513
SJAML007112_D2	Stranded_total_RNA_PE100bp	RUNX1-RUNX1T1	AML	AML	RUNX1-RUNX1T1	AML	no-ITD	-44.4292	63.3695
SJAML016570_D2	Stranded_total_RNA_PE100bp	NUP98-KDM5A	AML	AML	NUP98	AML	no-ITD	-71.0105	21.7138
SJAML040268_D3	Stranded_total_RNA_PE100bp	NUP98-NSD1	AML	AML	NUP98	AML	ITD	-35.9015	58.7237
SJAML045734_D1	Stranded_total_RNA_PE100bp	KMT2A-MLLT1;TASP1-PDCD6IP	AML	AML	KMT2A	AML	no-ITD	-72.5215	21.2772
SJAML045735_D1	Stranded_total_RNA_PE100bp	CBFB-MYH11	AML	AML	CBFB-MYH11	AML	no-ITD	-79.6254	81.3104
SJAML045736_D1	Stranded_total_RNA_PE100bp	KMT2A-MLLT3	AML	AML	KMT2A	AML	no-ITD	-74.3838	19.5759
SJAML045737_D1	Stranded_total_RNA_PE100bp	RUNX1-BCL11B	AML	AML	BCL11B	AML	ITD	-35.4351	110.447
SJAML045738_D1	Stranded_total_RNA_PE100bp	NoFusion	AML	AML	AML-other	AML	no-ITD	-33.8847	64.4082
SJAML045739_D1	Stranded_total_RNA_PE100bp	NoFusion	AML	AML	AML-other	AML	no-ITD	-36.0741	64.5774
SJAML045740_D1	Stranded_total_RNA_PE100bp	RUNX1-RUNX1T1	AML	AML	RUNX1-RUNX1T1	AML	no-ITD	-43.2413	64.0198
SJAML045741_D1	Stranded_total_RNA_PE100bp	RUNX1-RUNX1T1	AML	AML	RUNX1-RUNX1T1	AML	no-ITD	-44.012	65.3332
SJAML045742_D1	Stranded_total_RNA_PE100bp	KMT2A-MLLT3;TASP1-PDCD6IP	AML	AML	KMT2A	AML	no-ITD	-64.9629	28.7732
SJBALL021434_D1	Unstranded_mRNA_PE100bp	NoFusion	T-ALL	T-ALL	T-other	NA	no-ITD	-21.6907	-10.5502
SJALL016820_D1	Stranded_total_RNA_PE100bp	STIL-TAL1	T-ALL	T-ALL	TAL1	NA	no-ITD	-3.94175	-50.7128
SJALL016829_D1	Stranded_total_RNA_PE100bp	NoFusion	T-ALL	T-ALL	BCL11B	NA	no-ITD	-32.1324	98.2789
SJALL016827_D1	Stranded_total_RNA_PE100bp	NoFusion	T-ALL	T-ALL	TLX3	NA	no-ITD	56.624	24.6272
SJALL016824_D1	Stranded_total_RNA_PE100bp	STIL-TAL1	T-ALL	T-ALL	TAL1	NA	no-ITD	-31.1232	-81.9713
SJALL049959_D1	Stranded_total_RNA_PE100bp	PICALM-MLLT10;MLLT10-SYTL2	T-ALL	T-ALL	PICALM-MLLT10	NA	no-ITD	5.22624	65.2617
SJALL049979_D1	Stranded_total_RNA_PE100bp	BCR-ABL1	T-ALL	T-ALL	T-other	NA	no-ITD	-34.1884	55.3885
SJTALL169_D	Stranded_total_RNA_PE100bp	ETV6-FOXO1	T-ALL	T-ALL	T-other	ETP	no-ITD	1.40368	75.4005
SJTALL174_D	Stranded_total_RNA_PE100bp	KMT2A-MLLT4	T-ALL	T-ALL	KMT2A	ETP	no-ITD	-24.5389	55.2539
SJTALL022435_D1	Unstranded_mRNA_PE100bp	DDX3X-MLLT10;MLLT10-CASK	T-ALL	T-ALL	DDX3X-MLLT10	NA	no-ITD	37.8294	-6.44167
SJTALL022436_D1	Unstranded_mRNA_PE100bp	KMT2A-PICALM;BNIP2-CEP164	T-ALL	T-ALL	KMT2A	NA	no-ITD	21.8186	14.8201
SJTALL022437_D1	Unstranded_mRNA_PE100bp	PCID2-DZIP1	T-ALL	T-ALL	T-other	ETP	no-ITD	13.1634	40.2536
SJTALL182_D	Stranded_total_RNA_PE100bp	NoFusion	T-ALL	T-ALL	TLX3	ETP	ITD	57.9778	39.2998
SJTALL022438_D1	Unstranded_mRNA_PE100bp	NoFusion	T-ALL	T-ALL	T-other	NA	no-ITD	-2.83467	71.5475
SJTALL022439_D1	Unstranded_mRNA_PE100bp	MLLT10-DDX3X	T-ALL	T-ALL	DDX3X-MLLT10	NA	no-ITD	45.022	-7.78864
SJTALL186_D	Stranded_total_RNA_PE100bp	CREBBP-B2M	T-ALL	T-ALL	T-other	ETP	no-ITD	59.1782	21.6805
SJTALL187_D	Stranded_total_RNA_PE100bp	RUNX1-BCL11B	T-ALL	T-ALL	BCL11B	ETP	ITD	-30.5231	115.708
SJTALL022646_D1	Stranded_total_RNA_PE100bp	ETV6-ARNT	T-ALL	T-ALL	T-other	ETP	no-ITD	-2.71898	73.5035
SJTALL022490_D1	Unstranded_mRNA_PE100bp	PICALM-MLLT10	T-ALL	T-ALL	PICALM-MLLT10	NA	no-ITD	-6.06925	-18.2497
SJTALL022441_D1	Unstranded_mRNA_PE100bp	STIL-TAL1	T-ALL	T-ALL	TAL1	NA	no-ITD	-30.5621	-104.599
SJTALL022443_D1	Unstranded_mRNA_PE100bp	NoFusion	T-ALL	T-ALL	TLX3	NA	no-ITD	49.0454	43.719
SJTALL012399_D1	Stranded_total_RNA_PE100bp	BCL11B-ARID1B	T-ALL	T-ALL	BCL11B	ETP	ITD	-32.6133	106.365
SJTALL021688_D1	Stranded_total_RNA_PE100bp	SET-NUP214;FCHSD2-PRDM11	T-ALL	T-ALL	SET-NUP214	ETP	no-ITD	-6.02948	60.0751
SJTALL012400_D1	Stranded_total_RNA_PE100bp	DDX3X-MLLT10	T-ALL	T-ALL	DDX3X-MLLT10	ETP	no-ITD	-6.01328	55.1342
SJTALL021695_D1	Stranded_total_RNA_PE100bp	SET-NUP214;WIPF2-MPO	T-ALL	T-ALL	SET-NUP214	ETP	no-ITD	9.84935	67.8112
SJTALL022444_D1	Unstranded_mRNA_PE100bp	PICALM-MLLT10	T-ALL	T-ALL	PICALM-MLLT10	NA	no-ITD	17.5312	20.9751
SJTALL022445_D1	Unstranded_mRNA_PE100bp	PICALM-MLLT10	T-ALL	T-ALL	PICALM-MLLT10	NA	no-ITD	19.8733	49.3571
SJTALL022446_D1	Unstranded_mRNA_PE100bp	NUP214-ABL1	T-ALL	T-ALL	TLX3	NA	no-ITD	71.5312	25.1193
SJTALL022661_D1	Unstranded_mRNA_PE100bp	KMT2A-MLLT4	T-ALL	T-ALL	KMT2A	NA	no-ITD	46.8757	-7.67264
SJTALL022662_D1	Unstranded_mRNA_PE100bp	NoFusion	T-ALL	T-ALL	T-other	NA	no-ITD	27.8834	41.2054
SJTALL022448_D1	Unstranded_mRNA_PE100bp	NoFusion	T-ALL	T-ALL	T-other	NA	no-ITD	-31.8666	-105.907
SJTALL022449_D1	Unstranded_mRNA_PE100bp	STIL-TAL1	T-ALL	T-ALL	TAL1	NA	no-ITD	-2.77109	-80.2936
SJTALL012403_D1	Stranded_total_RNA_PE100bp	NoFusion	T-ALL	T-ALL	TLX3	ETP	no-ITD	66.5553	25.2611
SJTALL022663_D1	Unstranded_mRNA_PE100bp	NoFusion	T-ALL	T-ALL	T-other	NA	no-ITD	28.9441	44.6605
SJTALL022492_D1	Unstranded_mRNA_PE100bp	NUP98-LNP1	T-ALL	T-ALL	NUP98	NA	no-ITD	16.5892	47.5396
SJTALL022450_D1	Unstranded_mRNA_PE100bp	NoFusion	T-ALL	T-ALL	T-other	NA	no-ITD	26.7925	37.6834
SJTALL022664_D1	Unstranded_mRNA_PE100bp	STAG2(utr5)-LMO2(utr5+>62Kb)	T-ALL	T-ALL	nonTCR-LMO2	NA	no-ITD	28.4692	-39.7109
SJTALL022451_D1	Unstranded_mRNA_PE100bp	NoFusion	T-ALL	T-ALL	T-other	NA	no-ITD	-18.2027	-89.2275
SJINF070_D	Unstranded_mRNA_PE100bp	NoFusion	T-ALL	T-ALL	T-other	NA	no-ITD	-10.4738	-59.9631
SJINF061_D	Unstranded_mRNA_PE100bp	STAG2(coding)-LMO2(utr5+>62Kb)	T-ALL	T-ALL	nonTCR-LMO2	NA	no-ITD	22.7745	-39.8907
SJMLL013_D	Unstranded_mRNA_PE100bp	KMT2A-MLLT3	T-ALL	T-ALL	KMT2A	NA	no-ITD	-74.0827	11.8741
SJTALL004_D	Stranded_total_RNA_PE100bp	ZBTB16-ABL1	T-ALL	T-ALL	nonTCR-LMO2	ETP	no-ITD	29.0425	-33.1643
SJTALL002_D	Unstranded_mRNA_PE100bp	ETV6-INO80D	T-ALL	T-ALL	T-other	ETP	no-ITD	-3.77706	37.6296
SJTALL009_D	Stranded_total_RNA_PE100bp	SQSTM1-NUP214	T-ALL	T-ALL	T-other	ETP	no-ITD	8.31237	69.1241
SJMLL018_D	Unstranded_mRNA_PE100bp	KMT2A-MLLT3	T-ALL	T-ALL	KMT2A	NA	no-ITD	-73.05	13.1228
SJMLL020_D	Unstranded_mRNA_PE100bp	KMT2A-MLLT1	T-ALL	T-ALL	KMT2A	NA	no-ITD	-71.7998	15.2257
SJTALL012_D	Unstranded_mRNA_PE100bp	RUNX1-HOTTIP;RUNX1-EVX1	T-ALL	T-ALL	T-other	ETP	no-ITD	5.59998	41.7303
SJMLL008_D	Unstranded_mRNA_PE100bp	KMT2A-MLLT4	T-ALL	T-ALL	KMT2A	NA	no-ITD	11.7574	-9.88765
SJMLL021_D	Unstranded_mRNA_PE100bp	KMT2A-MLLT4	T-ALL	T-ALL	KMT2A	NA	no-ITD	-68.3879	18.2158
SJMLL022_D	Unstranded_mRNA_PE100bp	KMT2A-MLLT10	T-ALL	T-ALL	KMT2A	NA	no-ITD	-74.7004	14.8033
SJTALL022645_D1	Stranded_total_RNA_PE100bp	PICALM-MLLT10;MLLT10-SYTL2	T-ALL	T-ALL	PICALM-MLLT10	ETP	no-ITD	10.2818	69.9441
SJTALL015715_D1	Stranded_total_RNA_PE100bp	NoFusion	T-ALL	T-ALL(GD)	T-other	ETP	no-ITD	32.3872	51.1813
SJINF005_D	Unstranded_mRNA_PE100bp	KMT2A-MLLT1	T-ALL	T-ALL	KMT2A	NA	no-ITD	23.7162	-19.6237
SJMLL011_D	Unstranded_mRNA_PE100bp	KMT2A-ELL	T-ALL	T-ALL	KMT2A	NA	no-ITD	-25.3382	58.1586
SJHYPO104_D	Unstranded_mRNA_PE100bp	PICALM-MLLT10;SH2B3-TRG	T-ALL	T-ALL	PICALM-MLLT10	NA	no-ITD	38.1188	-9.45423
SJMLL012_D	Unstranded_mRNA_PE100bp	KMT2A-MLLT10	T-ALL	T-ALL	KMT2A	NA	no-ITD	-76.4737	14.6503
SJHYPO105_D	Unstranded_mRNA_PE100bp	STIL-TAL1	T-ALL	T-ALL	TAL1	NA	no-ITD	19.8941	-95.4876
SJALL015241_D1	Stranded_total_RNA_PE100bp	TRB-TLX1	T-ALL	T-ALL	TLX1	NA	no-ITD	89.9805	-16.9812
SJALL015242_D1	Stranded_total_RNA_PE100bp	TCRB-TAL2	T-ALL	T-ALL	TAL2	NA	no-ITD	-13.6932	-24.087
SJALL015243_D1	Stranded_total_RNA_PE100bp	TCRB-HOXA11	T-ALL	T-ALL	HOXA	NA	no-ITD	39.9046	14.809
SJALL015244_D1	Stranded_total_RNA_PE100bp	STIL-TAL1;LMO1-TRB	T-ALL	T-ALL	TAL1	NA	no-ITD	2.45177	-95.5522
SJALL015245_D1	Stranded_total_RNA_PE100bp	MYB-PLAGL1	T-ALL	T-ALL	T-other	NA	no-ITD	-4.23827	9.81849
SJALL015246_D1	Stranded_total_RNA_PE100bp	MYB-AHI1	T-ALL	T-ALL	T-other	NA	no-ITD	-11.1409	-25.1092
SJALL015247_D1	Stranded_total_RNA_PE100bp	TAL1-STIL;LMO2-TCRA	T-ALL	T-ALL	TAL1	NA	no-ITD	8.96044	-90.394
SJALL015248_D1	Stranded_total_RNA_PE100bp	NRXN3-BCL11B	T-ALL	T-ALL	NKX2_1	NA	no-ITD	48.598	-58.2535
SJALL015249_D1	Stranded_total_RNA_PE100bp	STIL-TAL1	T-ALL	T-ALL	TAL1	NA	no-ITD	-45.2102	-91.9205
SJALL015250_D1	Stranded_total_RNA_PE100bp	CDK6-TLX3	T-ALL	T-ALL	TLX3	NA	no-ITD	72.7544	26.5422
SJALL015251_D1	Stranded_total_RNA_PE100bp	NoFusion	T-ALL	T-ALL	BCL11B	NA	ITD	-31.9978	114.185
SJALL015252_D1	Stranded_total_RNA_PE100bp	NONO-ZFP36L2	T-ALL	T-ALL	T-other	NA	no-ITD	33.6837	33.5343
SJALL015253_D1	Stranded_total_RNA_PE100bp	TRB-TLX1	T-ALL	T-ALL	TLX1	NA	no-ITD	88.2505	-16.1502
SJALL015254_D1	Stranded_total_RNA_PE100bp	MYB-AHI1;TCTA-LUZP6	T-ALL	T-ALL	TLX1	NA	no-ITD	83.9119	-17.7012
SJALL015255_D1	Stranded_total_RNA_PE100bp	STIL-TAL1	T-ALL	T-ALL	TAL1	NA	no-ITD	-32.1055	-99.1679
SJALL015256_D1	Stranded_total_RNA_PE100bp	NoFusion	T-ALL	T-ALL	TLX3	NA	no-ITD	83.7287	24.1024
SJALL015257_D1	Stranded_total_RNA_PE100bp	TCRB-IL2RB	T-ALL	T-ALL	TLX3	NA	no-ITD	61.3842	32.4784
SJALL015258_D1	Stranded_total_RNA_PE100bp	NoFusion	T-ALL	T-ALL	TLX3	NA	no-ITD	71.524	34.6613
SJALL015259_D1	Stranded_total_RNA_PE100bp	PICALM-MLLT10	T-ALL	T-ALL	PICALM-MLLT10	NA	no-ITD	42.3234	-1.22056
SJALL015260_D1	Stranded_total_RNA_PE100bp	STIL-TAL1	T-ALL	T-ALL	TAL1	NA	no-ITD	-5.5654	-88.642
SJALL015261_D1	Stranded_total_RNA_PE100bp	TAL1-STIL	T-ALL	T-ALL	TAL1	NA	no-ITD	-24.8711	-77.6242
SJALL015262_D1	Stranded_total_RNA_PE100bp	STIL-TAL1	T-ALL	T-ALL	TAL1	NA	no-ITD	0.0241173	-61.7023
SJALL015263_D1	Stranded_total_RNA_PE100bp	STIL-TAL1	T-ALL	T-ALL	TAL1	nearETP	no-ITD	-30.4742	-70.8877
SJALL015264_D1	Stranded_total_RNA_PE100bp	NoFusion	T-ALL	T-ALL	TAL1	NA	no-ITD	-26.6256	-72.3121
SJALL015265_D1	Stranded_total_RNA_PE100bp	NoFusion	T-ALL	T-ALL	TLX1	NA	no-ITD	72.5577	-19.0133
SJALL015266_D1	Stranded_total_RNA_PE100bp	NoFusion	T-ALL	T-ALL	TLX3	NA	no-ITD	89.0031	16.5757
SJALL015267_D1	Stranded_total_RNA_PE100bp	NoFusion	T-ALL	T-ALL	TLX3	NA	no-ITD	72.0663	32.8198
SJALL015268_D1	Stranded_total_RNA_PE100bp	STIL-TAL1	T-ALL	T-ALL	TAL1	NA	no-ITD	-46.301	-86.4067
SJALL015269_D1	Stranded_total_RNA_PE100bp	NoFusion	T-ALL	T-ALL	TAL1	NA	no-ITD	-0.886299	-53.7999
SJALL015270_D1	Stranded_total_RNA_PE100bp	NoFusion	T-ALL	T-ALL	TAL1	NA	no-ITD	-0.586017	-47.4144
SJALL015271_D1	Stranded_total_RNA_PE100bp	LMO1-TCRA	T-ALL	T-ALL	LMO1/2	NA	no-ITD	0.53479	-96.1497
SJALL015272_D1	Stranded_total_RNA_PE100bp	NoFusion	T-ALL	T-ALL	T-other	NA	no-ITD	0.887114	-99.8966
SJALL015273_D1	Stranded_total_RNA_PE100bp	NAP1L1-MLLT10;MLLT10-CAPS2	T-ALL	T-ALL	T-other	NA	no-ITD	11.6574	62.4369
SJALL015274_D1	Stranded_total_RNA_PE100bp	STIL-TAL1	T-ALL	T-ALL	TAL1	NA	no-ITD	-1.04706	-81.6717
SJALL015275_D1	Stranded_total_RNA_PE100bp	GLUL-TAL1	T-ALL	T-ALL	TAL1	NA	no-ITD	-16.1336	-75.269
SJALL015276_D1	Stranded_total_RNA_PE100bp	STIL-TAL1	T-ALL	T-ALL	TAL1	NA	no-ITD	-40.0688	-84.1358
SJALL015277_D1	Stranded_total_RNA_PE100bp	TCRA-LMO2 (WGS)	T-ALL	T-ALL	LMO1/2	notETP	no-ITD	7.28901	-82.0873
SJALL015278_D1	Stranded_total_RNA_PE100bp	STIL-TAL1	T-ALL	T-ALL	TAL1	NA	no-ITD	17.3475	-79.4807
SJALL015279_D1	Stranded_total_RNA_PE100bp	TAL1-TRA	T-ALL	T-ALL	TAL1	NA	no-ITD	6.04917	-83.5476
SJALL015280_D1	Stranded_total_RNA_PE100bp	STIL-TAL1	T-ALL	T-ALL	TAL1	NA	no-ITD	-35.5448	-93.2824
SJALL015281_D1	Stranded_total_RNA_PE100bp	NKX2-1-TRA	T-ALL	T-ALL	NKX2_1	NA	no-ITD	53.105	-64.4295
SJALL015282_D1	Stranded_total_RNA_PE100bp	NoFusion	T-ALL	T-ALL	nonTCR-LMO2	NA	no-ITD	29.6484	-40.6864
SJALL015283_D1	Stranded_total_RNA_PE100bp	NUP98-CCDC28A	T-ALL	T-ALL	NUP98	NA	no-ITD	44.0067	1.5834
SJALL015284_D1	Stranded_total_RNA_PE100bp	TAL1-STIL	T-ALL	T-ALL	TAL1	notETP	no-ITD	-30.6705	-72.9126
SJALL015285_D1	Stranded_total_RNA_PE100bp	STIL-TAL1	T-ALL	T-ALL	TAL1	notETP	no-ITD	-20.8022	-92.9049
SJALL015582_D1	Stranded_total_RNA_PE100bp	NoFusion	T-ALL	T-ALL	TAL1	NA	no-ITD	-25.3556	-70.1667
SJALL015586_D1	Stranded_total_RNA_PE100bp	NoFusion	T-ALL	T-ALL	TAL1	NA	no-ITD	11.8868	-95.9785
SJALL015621_D1	Stranded_total_RNA_PE100bp	DOCK2-ITGB2-AS1	T-ALL	T-ALL	TLX3	NA	no-ITD	85.658	15.1243
SJALL015622_D1	Stranded_total_RNA_PE100bp	LMO2-TRB	T-ALL	T-ALL	LMO1/2	NA	no-ITD	-2.06207	-71.5059
SJALL015623_D1	Stranded_total_RNA_PE100bp	LMO2-TRA	T-ALL	T-ALL	LMO1/2	NA	no-ITD	-5.01718	-70.774
SJALL015624_D1	Stranded_total_RNA_PE100bp	NoFusion	T-ALL	T-ALL	TAL1	notETP	no-ITD	-41.0804	-93.8708
SJALL015625_D1	Stranded_total_RNA_PE100bp	TAL1-STIL	T-ALL	T-ALL	TAL1	notETP	no-ITD	-24.8977	-97.1276
SJALL015626_D1	Stranded_total_RNA_PE100bp	CSTF3-LMO2	T-ALL	T-ALL	TAL1	notETP	no-ITD	8.48542	-78.8801
SJALL015627_D1	Stranded_total_RNA_PE100bp	NoFusion	T-ALL	T-ALL	TAL1	notETP	no-ITD	-21.8266	-94.4095
SJALL015628_D1	Stranded_total_RNA_PE100bp	NoFusion	T-ALL	T-ALL	NKX2_1	notETP	no-ITD	52.8823	-61.8965
SJALL015629_D1	Stranded_total_RNA_PE100bp	LMO2-TCRA	T-ALL	T-ALL	LMO1/2	notETP	no-ITD	10.6164	-78.8198
SJALL015630_D1	Stranded_total_RNA_PE100bp	NoFusion	T-ALL	T-ALL	TLX1	notETP	no-ITD	90.9307	-22.0362
SJALL015631_D1	Stranded_total_RNA_PE100bp	KMT2A-MLLT1;MYB-AHI1	T-ALL	T-ALL	KMT2A	notETP	no-ITD	21.8404	-13.1489
SJALL015632_D1	Stranded_total_RNA_PE100bp	STIL-TAL1	T-ALL	T-ALL	TAL1	notETP	no-ITD	-29.3928	-91.3532
SJALL015633_D1	Stranded_total_RNA_PE100bp	TAL2-TRB	T-ALL	T-ALL	TAL2	notETP	no-ITD	11.1222	-80.1605
SJALL015634_D1	Stranded_total_RNA_PE100bp	STIL-TAL1	T-ALL	T-ALL	TAL1	notETP	no-ITD	11.8232	-77.9111
SJALL015635_D1	Stranded_total_RNA_PE100bp	TLX3-BCL11B	T-ALL	T-ALL	TLX3	notETP	no-ITD	74.0556	5.62882
SJALL015636_D1	Stranded_total_RNA_PE100bp	NKX2-1-TRA	T-ALL	T-ALL	NKX2_1	notETP	no-ITD	54.6916	-62.3859
SJALL015637_D1	Stranded_total_RNA_PE100bp	STIL-TAL1	T-ALL	T-ALL	TAL1	notETP	no-ITD	4.23597	-77.755
SJALL015638_D1	Stranded_total_RNA_PE100bp	TCRA-LMO2 (WGS)	T-ALL	T-ALL	LMO1/2	notETP	no-ITD	21.4729	-54.1476
SJALL015639_D1	Stranded_total_RNA_PE100bp	NoFusion	T-ALL	T-ALL	T-other	notETP	no-ITD	25.2569	-55.9909
SJALL015640_D1	Stranded_total_RNA_PE100bp	NKX2-1r(WGS);UTRN-ENTPD5;CEP85L-TRA;ENTPD5-AHI1	T-ALL	T-ALL	NKX2_1	notETP	no-ITD	52.2296	-51.5047
SJALL015641_D1	Stranded_total_RNA_PE100bp	NoFusion	T-ALL	T-ALL	TLX3	notETP	ITD	61.9595	22.1628
SJALL015642_D1	Stranded_total_RNA_PE100bp	NoFusion	T-ALL	T-ALL	TAL1	notETP	no-ITD	-2.07246	-87.2663
SJALL015643_D1	Stranded_total_RNA_PE100bp	STIL-TAL1	T-ALL	T-ALL	TAL1	nearETP	no-ITD	-1.78962	-95.6631
SJALL015644_D1	Stranded_total_RNA_PE100bp	STIL-TAL1	T-ALL	T-ALL	TAL1	nearETP	no-ITD	-27.4126	-97.8861
SJALL015645_D1	Stranded_total_RNA_PE100bp	NoFusion	T-ALL	T-ALL	TAL1	notETP	no-ITD	-21.6498	-75.0168
SJALL015646_D1	Stranded_total_RNA_PE100bp	NoFusion	T-ALL	T-ALL	TLX3	nearETP	ITD	72.4822	29.0555
SJALL015647_D1	Stranded_total_RNA_PE100bp	NoFusion	T-ALL	T-ALL	T-other	notETP	no-ITD	-0.061951	-71.9713
SJALL015648_D1	Stranded_total_RNA_PE100bp	IL9R-VAMP7	T-ALL	T-ALL	TAL1	notETP	no-ITD	-5.44112	-74.646
SJALL015649_D1	Stranded_total_RNA_PE100bp	NoFusion	T-ALL	T-ALL	TLX1	notETP	no-ITD	77.0751	-7.14853
SJALL015650_D1	Stranded_total_RNA_PE100bp	NoFusion	T-ALL	T-ALL	TLX3	nearETP	no-ITD	54.8618	38.3755
SJALL015651_D1	Stranded_total_RNA_PE100bp	PICALM-MLLT10	T-ALL	T-ALL	PICALM-MLLT10	notETP	no-ITD	18.2399	3.67706
SJALL015652_D1	Stranded_total_RNA_PE100bp	KMT2A-MLLT1	T-ALL	T-ALL	KMT2A	notETP	no-ITD	15.1169	-9.09685
SJALL015653_D1	Stranded_total_RNA_PE100bp	STIL-TAL1	T-ALL	T-ALL	TAL1	notETP	no-ITD	14.1699	-76.6336
SJALL015654_D1	Stranded_total_RNA_PE100bp	TAL1-TRA;LMO2-TRB	T-ALL	T-ALL	TAL1	notETP	no-ITD	1.30174	-62.845
SJALL015655_D1	Stranded_total_RNA_PE100bp	NKX2-1-TRA	T-ALL	T-ALL	NKX2_1	notETP	no-ITD	48.6292	-66.1948
SJALL015656_D1	Stranded_total_RNA_PE100bp	DHX9-TAL1	T-ALL	T-ALL	TAL1	notETP	no-ITD	-9.9339	-52.1246
SJALL015657_D1	Stranded_total_RNA_PE100bp	STIL-TAL1	T-ALL	T-ALL	TAL1	nearETP	no-ITD	-24.2452	-91.0385
SJALL015658_D1	Stranded_total_RNA_PE100bp	NoFusion	T-ALL	T-ALL	TAL1	notETP	no-ITD	-38.2949	-91.5246
SJALL015659_D1	Stranded_total_RNA_PE100bp	NoFusion	T-ALL	T-ALL	TAL1	nearETP	no-ITD	-20.9496	-88.0732
SJALL015660_D1	Stranded_total_RNA_PE100bp	LINC00502-TLX1	T-ALL	T-ALL	TLX1	notETP	no-ITD	78.8462	-18.9669
SJALL015661_D1	Stranded_total_RNA_PE100bp	TAL2-TCRB	T-ALL	T-ALL	TAL2	notETP	no-ITD	6.59198	-60.868
SJALL015662_D1	Stranded_total_RNA_PE100bp	TCRB-TAL2;LEF1-SGMS2	T-ALL	T-ALL	TAL2	notETP	no-ITD	4.78537	-79.8325
SJALL015663_D1	Stranded_total_RNA_PE100bp	KMT2A-MLLT1	T-ALL	T-ALL	KMT2A	notETP	no-ITD	18.7869	-15.3673
SJALL015664_D1	Stranded_total_RNA_PE100bp	STIL-TAL1	T-ALL	T-ALL	TAL1	nearETP	no-ITD	-46.0025	-90.6384
SJALL015665_D1	Stranded_total_RNA_PE100bp	TCRB-HOXA11	T-ALL	T-ALL	HOXA	notETP	no-ITD	50.1509	-4.70789
SJALL015667_D1	Stranded_total_RNA_PE100bp	NoFusion	T-ALL	T-ALL	TLX3	nearETP	no-ITD	85.3724	27.8201
SJALL015668_D1	Stranded_total_RNA_PE100bp	NoFusion	T-ALL	T-ALL	TAL2	nearETP	no-ITD	-35.0204	-103.82
SJALL015669_D1	Stranded_total_RNA_PE100bp	NoFusion	T-ALL	T-ALL	TLX3	notETP	no-ITD	72.7432	3.90028
SJALL015670_D1	Stranded_total_RNA_PE100bp	LMO2-TCRB	T-ALL	T-ALL	LMO1/2	notETP	no-ITD	-1.946	-73.3734
SJALL015671_D1	Stranded_total_RNA_PE100bp	NKX2-1-BCL11B;C14ORF166-STXBP6;PELI2-C14ORF39	T-ALL	T-ALL	NKX2_1	notETP	no-ITD	53.8458	-59.0409
SJALL015672_D1	Stranded_total_RNA_PE100bp	KMT2A-MLLT6	T-ALL	T-ALL	KMT2A	notETP	no-ITD	19.4921	10.0463
SJALL015673_D1	Stranded_total_RNA_PE100bp	TCRB-MYB	T-ALL	T-ALL	T-other	notETP	no-ITD	50.8608	-50.7913
SJALL015674_D1	Stranded_total_RNA_PE100bp	TAL1-TCRA	T-ALL	T-ALL	TAL1	notETP	no-ITD	-12.0571	-22.2031
SJALL015675_D1	Stranded_total_RNA_PE100bp	NoFusion	T-ALL	T-ALL	TAL1	notETP	no-ITD	4.90795	-73.1263
SJALL015678_D1	Stranded_total_RNA_PE100bp	KMT2A-MLLT4	T-ALL	T-ALL	KMT2A	notETP	no-ITD	26.2148	-8.01818
SJALL015679_D1	Stranded_total_RNA_PE100bp	TLX3-CDK6	T-ALL	T-ALL	TLX3	ETP	no-ITD	57.9237	33.4132
SJALL015680_D1	Stranded_total_RNA_PE100bp	STIL-TAL1;CD99-JAK2	T-ALL	T-ALL	TAL1	notETP	no-ITD	-33.0099	-93.1609
SJALL015681_D1	Stranded_total_RNA_PE100bp	TLX3-TCRB	T-ALL	T-ALL	TLX3	notETP	no-ITD	75.5063	38.7806
SJALL015682_D1	Stranded_total_RNA_PE100bp	STIL-TAL1	T-ALL	T-ALL	TAL1	notETP	no-ITD	8.09714	-72.072
SJALL015683_D1	Stranded_total_RNA_PE100bp	TAL2-TRB	T-ALL	T-ALL	TAL2	notETP	no-ITD	-18.3467	-95.4418
SJALL015684_D1	Stranded_total_RNA_PE100bp	NoFusion	T-ALL	T-ALL	TAL1	notETP	no-ITD	1.6562	-74.9764
SJALL015685_D1	Stranded_total_RNA_PE100bp	TCRB-TLX1	T-ALL	T-ALL	TLX1	notETP	no-ITD	75.2321	-6.20153
SJALL015686_D1	Stranded_total_RNA_PE100bp	NoFusion	T-ALL	T-ALL	TLX3	notETP	no-ITD	89.1857	4.81253
SJALL015687_D1	Stranded_total_RNA_PE100bp	STIL-TAL1	T-ALL	T-ALL	TAL1	nearETP	no-ITD	10.575	-70.7451
SJALL015688_D1	Stranded_total_RNA_PE100bp	EDF1-NOTCH1	T-ALL	T-ALL	T-other	notETP	no-ITD	-32.9092	-88.0686
SJALL015689_D1	Stranded_total_RNA_PE100bp	BCL11B-TLX3	T-ALL	T-ALL	TLX3	notETP	no-ITD	84.3358	11.7272
SJALL015690_D1	Stranded_total_RNA_PE100bp	NoFusion	T-ALL	T-ALL	NKX2_1	notETP	no-ITD	49.1129	-51.1425
SJALL015691_D1	Stranded_total_RNA_PE100bp	NoFusion	T-ALL	T-ALL	TLX3	notETP	no-ITD	64.8435	23.1799
SJALL015693_D1	Stranded_total_RNA_PE100bp	NKX2-1-DIO2;PPP2R5C-SLC38A6	T-ALL	T-ALL	NKX2_1	notETP	no-ITD	51.3021	-53.1856
SJALL015694_D1	Stranded_total_RNA_PE100bp	STIL-TAL1	T-ALL	T-ALL	TAL1	notETP	no-ITD	6.407	-67.9498
SJALL015695_D1	Stranded_total_RNA_PE100bp	NoFusion	T-ALL	T-ALL	NKX2_1	notETP	no-ITD	51.8026	-65.3454
SJALL015696_D1	Stranded_total_RNA_PE100bp	STIL-TAL1	T-ALL	T-ALL	TAL1	notETP	no-ITD	-26.8122	-93.807
SJALL015697_D1	Stranded_total_RNA_PE100bp	STIL-TAL1	T-ALL	T-ALL	TAL1	notETP	no-ITD	17.0026	-81.5016
SJALL015698_D1	Stranded_total_RNA_PE100bp	TLX1-RPP30;PPP2CA-FSTL4	T-ALL	T-ALL	TLX1	notETP	no-ITD	78.2143	-10.0896
SJALL015699_D1	Stranded_total_RNA_PE100bp	TAL1-TRA	T-ALL	T-ALL	TAL1	notETP	no-ITD	11.124	-73.9763
SJALL015700_D1	Stranded_total_RNA_PE100bp	STIL-TAL1	T-ALL	T-ALL	TAL1	notETP	no-ITD	-32.0056	-94.7342
SJALL015701_D1	Stranded_total_RNA_PE100bp	NKX2-1-TRA	T-ALL	T-ALL	NKX2_1	notETP	no-ITD	49.2466	-67.5013
SJALL015702_D1	Stranded_total_RNA_PE100bp	NoFusion	T-ALL	T-ALL	T-other	notETP	no-ITD	5.9177	-89.2291
SJALL015703_D1	Stranded_total_RNA_PE100bp	TRB-HOXA10	T-ALL	T-ALL	HOXA	notETP	no-ITD	53.1886	-3.48886
SJALL015704_D1	Stranded_total_RNA_PE100bp	PICALM-MLLT10	T-ALL	T-ALL	PICALM-MLLT10	notETP	no-ITD	37.892	4.46586
SJALL015705_D1	Stranded_total_RNA_PE100bp	NKX2-1-TCRA	T-ALL	T-ALL	NKX2_1	notETP	no-ITD	51.6073	-67.6082
SJALL015706_D1	Stranded_total_RNA_PE100bp	NoFusion	T-ALL	T-ALL	TAL1	notETP	no-ITD	9.98783	-85.2309
SJALL015707_D1	Stranded_total_RNA_PE100bp	KMT2A-ELL	T-ALL	T-ALL	KMT2A	NA	no-ITD	2.37797	60.0437
SJALL015708_D1	Stranded_total_RNA_PE100bp	NoFusion	T-ALL	T-ALL	TAL1	notETP	no-ITD	9.14598	-62.3064
SJALL015709_D1	Stranded_total_RNA_PE100bp	TRB-LYL1	T-ALL	T-ALL	T-other	notETP	no-ITD	8.83778	-75.896
SJALL015710_D1	Stranded_total_RNA_PE100bp	TLX1-LINC00502	T-ALL	T-ALL	TLX1	notETP	no-ITD	-10.679	-28.5494
SJALL015711_D1	Stranded_total_RNA_PE100bp	SETD7-ATP8B4	T-ALL	T-ALL	TLX3	notETP	no-ITD	61.6723	15.1874
SJALL015712_D1	Stranded_total_RNA_PE100bp	ZFP36L2-TCRA	T-ALL	T-ALL	T-other	notETP	no-ITD	31.3347	34.8124
SJALL015713_D1	Stranded_total_RNA_PE100bp	NoFusion	T-ALL	T-ALL	TAL1	notETP	no-ITD	-36.236	-90.9318
SJALL015714_D1	Stranded_total_RNA_PE100bp	CDKN2A-TRA	T-ALL	T-ALL	TAL1	notETP	no-ITD	-47.3685	-94.8333
SJALL015989_D1	Stranded_total_RNA_PE100bp	STIL-TAL1	T-ALL	T-ALL	TAL1	nearETP	no-ITD	-29.5557	-99.7439
SJALL015990_D1	Stranded_total_RNA_PE100bp	BCL11B-TLX3 (WGS)	T-ALL	T-ALL	TLX3	notETP	ITD	86.3624	16.3754
SJALL015991_D1	Stranded_total_RNA_PE100bp	KMT2A-MLLT1	T-ALL	T-ALL	KMT2A	notETP	no-ITD	19.7538	-12.9412
SJALL015992_D1	Stranded_total_RNA_PE100bp	STIL-TAL1	T-ALL	T-ALL	TAL1	nearETP	no-ITD	-28.2755	-96.4832
SJALL015993_D1	Stranded_total_RNA_PE100bp	NoFusion	T-ALL	T-ALL	T-other	notETP	no-ITD	3.55964	-86.5649
SJALL015994_D1	Stranded_total_RNA_PE100bp	PICALM-MLLT10	T-ALL	T-ALL	PICALM-MLLT10	notETP	no-ITD	39.3109	1.46627
SJALL015995_D1	Stranded_total_RNA_PE100bp	LINC01550-TLX3	T-ALL	T-ALL	TLX3	nearETP	no-ITD	75.3516	26.9002
SJALL015996_D1	Stranded_total_RNA_PE100bp	WDR76-SERF2	T-ALL	T-ALL	T-other	notETP	no-ITD	77.9214	-28.6668
SJALL015997_D1	Stranded_total_RNA_PE100bp	STIL-TAL1	T-ALL	T-ALL	TAL1	NA	no-ITD	-39.7292	-92.4852
SJALL015998_D1	Stranded_total_RNA_PE100bp	NoFusion	T-ALL	T-ALL	TAL1	notETP	no-ITD	-4.01987	-72.9035
SJALL015999_D1	Stranded_total_RNA_PE100bp	PPP6R3-INTS4	T-ALL	T-ALL	TLX3	nearETP	ITD	66.6628	23.2566
SJALL016000_D1	Stranded_total_RNA_PE100bp	TAL1-TRA	T-ALL	T-ALL	TAL1	notETP	no-ITD	-1.32047	-56.2397
SJALL016001_D1	Stranded_total_RNA_PE100bp	NUP214-ABL1	T-ALL	T-ALL	TLX3	notETP	no-ITD	60.3256	26.1466
SJALL016002_D1	Stranded_total_RNA_PE100bp	NoFusion	T-ALL	T-ALL	T-other	nearETP	no-ITD	12.4129	59.4138
SJALL016003_D1	Stranded_total_RNA_PE100bp	TCRA-NKX2-1	T-ALL	T-ALL	NKX2_1	notETP	no-ITD	53.9178	-66.2792
SJALL016429_D1	Stranded_total_RNA_PE100bp	GNPAT-TAL1	T-ALL	T-ALL	TAL1	NA	no-ITD	20.8458	-72.2321
SJALL016430_D1	Stranded_total_RNA_PE100bp	NoFusion	T-ALL	T-ALL	BCL11B	NA	ITD	-26.45	112.143
SJALL016431_D1	Stranded_total_RNA_PE100bp	TAL1-STIL	T-ALL	T-ALL	TAL1	NA	no-ITD	4.36242	-61.2312
SJALL016433_D1	Stranded_total_RNA_PE100bp	NoFusion	T-ALL	T-ALL	T-other	nearETP	no-ITD	15.9631	56.5515
SJALL016434_D1	Stranded_total_RNA_PE100bp	NoFusion	T-ALL	T-ALL	T-other	notETP	no-ITD	13.3259	62.2695
SJALL016435_D1	Stranded_total_RNA_PE100bp	NoFusion	T-ALL	T-ALL	TLX3	notETP	no-ITD	70.2039	41.455
SJALL016436_D1	Stranded_total_RNA_PE100bp	PICALM-MLLT10	T-ALL	T-ALL	PICALM-MLLT10	notETP	no-ITD	45.6662	2.63382
SJALL016437_D1	Stranded_total_RNA_PE100bp	DDX3X-MLLT10	T-ALL	T-ALL	DDX3X-MLLT10	notETP	no-ITD	42.8058	0.0765373
SJALL016438_D1	Stranded_total_RNA_PE100bp	NoFusion	T-ALL	T-ALL	TAL1	ETP	no-ITD	17.4281	70.7966
SJALL016439_D1	Stranded_total_RNA_PE100bp	NoFusion	T-ALL	T-ALL	T-other	notETP	no-ITD	26.3833	-18.3849
SJALL016440_D1	Stranded_total_RNA_PE100bp	PICALM-MLLT10	T-ALL	T-ALL	PICALM-MLLT10	notETP	no-ITD	39.5088	-2.65409
SJALL016441_D1	Stranded_total_RNA_PE100bp	NoFusion	T-ALL	T-ALL	TAL1	notETP	no-ITD	-15.4472	-42.7001
SJALL016442_D1	Stranded_total_RNA_PE100bp	NoFusion	T-ALL	T-ALL	TLX1	notETP	no-ITD	82.6906	-22.0646
SJALL016443_D1	Stranded_total_RNA_PE100bp	ETV6-CTNNB1	T-ALL	T-ALL	TAL1	ETP	no-ITD	2.19334	73.6645
SJALL016444_D1	Stranded_total_RNA_PE100bp	NUP98-PSIP1	T-ALL	T-ALL	NUP98	ETP	no-ITD	16.7177	24.8247
SJALL016445_D1	Stranded_total_RNA_PE100bp	NoFusion	T-ALL	T-ALL	T-other	ETP	no-ITD	30.7649	50.6155
SJALL016446_D1	Stranded_total_RNA_PE100bp	NoFusion	T-ALL	T-ALL	TLX3	notETP	no-ITD	86.0768	19.2189
SJALL016630_D1	Stranded_total_RNA_PE100bp	NoFusion	T-ALL	T-ALL	TLX3	NA	no-ITD	65.9509	41.0398
SJALL016653_D1	Stranded_total_RNA_PE100bp	STIL-TAL1	T-ALL	T-ALL	TAL1	NA	no-ITD	16.6654	-55.1528
SJBALL001653_D1	Stranded_total_RNA_PE100bp	NoFusion	T-ALL	T-ALL	T-other	notETP	no-ITD	25.0783	44.1225
SJBALL001675_D1	Stranded_total_RNA_PE100bp	TCRA-TLX1	T-ALL	T-ALL	TLX1	notETP	no-ITD	75.8852	-17.7631
SJBALL001782_D1	Stranded_total_RNA_PE100bp	BCL11B-TLX3;NCOR1-NFIA	T-ALL	T-ALL	TLX3	notETP	no-ITD	-6.7949	13.0092
SJBALL002373_D1	Stranded_total_RNA_PE100bp	TLX1-LINC00502	T-ALL	T-ALL	TLX1	NA	no-ITD	85.4919	-16.993
SJTALL001636_D1	Stranded_total_RNA_PE100bp	KMT2A-MLLT10	T-ALL	T-ALL	KMT2A	notETP	no-ITD	38.2664	-0.0539158
SJTALL001639_D1	Stranded_total_RNA_PE100bp	BCL2L1-DUSP15;TPX2-TTLL9;POFUT1-HCK	T-ALL	T-ALL	TLX1	notETP	no-ITD	79.8898	-21.2549
SJTALL001677_D1	Stranded_total_RNA_PE100bp	STIL-TAL1	T-ALL	T-ALL	TAL1	notETP	no-ITD	0.86447	-82.9927
SJTALL001777_D1	Stranded_total_RNA_PE100bp	STIL-TAL1	T-ALL	T-ALL	TAL1	notETP	no-ITD	-23.0185	-92.4933
SJTALL001780_D1	Stranded_total_RNA_PE100bp	LINC01550-TLX3	T-ALL	T-ALL	TLX3	notETP	no-ITD	84.5881	9.91741
SJTALL001785_D1	Stranded_total_RNA_PE100bp	KMT2A-MLLT1	T-ALL	T-ALL	KMT2A	notETP	no-ITD	20.5546	-14.6934
SJTALL001786_D1	Stranded_total_RNA_PE100bp	NUP214-ABL1;BCL11B-TLX3	T-ALL	T-ALL	TLX3	notETP	no-ITD	74.1041	30.0773
SJTALL002005_D1	Stranded_total_RNA_PE100bp	LMO2-TRA;TAL1-STIL	T-ALL	T-ALL	TAL1	NA	no-ITD	-31.3566	-74.1076
SJTALL002007_D1	Stranded_total_RNA_PE100bp	TLX1-TRA	T-ALL	T-ALL	TLX1	NA	no-ITD	86.8773	-7.40118
SJTALL002009_D1	Stranded_total_RNA_PE100bp	NUP214-ABL1;BCL11B-TLX3	T-ALL	T-ALL	TLX3	NA	no-ITD	62.8941	25.2187
SJTALL002019_D1	Stranded_total_RNA_PE100bp	ZC3HAV1-ABL2	T-ALL	T-ALL	TAL1	NA	no-ITD	-16.0339	-37.8294
SJTALL002030_D1	Stranded_total_RNA_PE100bp	STIL-TAL1	T-ALL	T-ALL	TAL1	NA	no-ITD	-46.5169	-84.948
SJTALL002035_D1	Stranded_total_RNA_PE100bp	TAL1-STIL	T-ALL	T-ALL	TAL1	notETP	no-ITD	-25.3657	-101.657
SJTALL002036_D1	Stranded_total_RNA_PE100bp	TAL1-TARP	T-ALL	T-ALL	TAL1	NA	no-ITD	-23.3402	-70.2816
SJTALL002039_D1	Stranded_total_RNA_PE100bp	NoFusion	T-ALL	T-ALL	T-other	ETP	no-ITD	-9.24374	53.5664
SJTALL002042_D1	Stranded_total_RNA_PE100bp	NoFusion	T-ALL	T-ALL	T-other	notETP	no-ITD	-10.6881	-22.6608
SJTALL002045_D1	Stranded_total_RNA_PE100bp	LEF1-TAF8	T-ALL	T-ALL	TAL1	NA	no-ITD	6.97025	-76.2941
SJTALL002048_D1	Stranded_total_RNA_PE100bp	NoFusion	T-ALL	T-ALL	TAL1	NA	no-ITD	5.91796	-62.3026
SJTALL002049_D1	Stranded_total_RNA_PE100bp	NoFusion	T-ALL	T-ALL	T-other	NA	no-ITD	-33.2593	-76.4051
SJTALL002050_D1	Stranded_total_RNA_PE100bp	NoFusion	T-ALL	T-ALL	TLX3	notETP	no-ITD	85.7949	7.0881
SJTALL002051_D1	Stranded_total_RNA_PE100bp	NoFusion	T-ALL	T-ALL	TLX3	notETP	no-ITD	88.5159	12.1394
SJTALL002055_D1	Stranded_total_RNA_PE100bp	NoFusion	T-ALL	T-ALL	T-other	notETP	no-ITD	5.79535	-95.154
SJTALL002060_D1	Stranded_total_RNA_PE100bp	STIL-TAL1	T-ALL	T-ALL	TAL1	NA	no-ITD	-30.7023	-96.6926
SJTALL002065_D1	Stranded_total_RNA_PE100bp	NoFusion	T-ALL	T-ALL	TLX3	notETP	ITD	75.5479	33.8468
SJTALL002069_D1	Stranded_total_RNA_PE100bp	STIL-TAL1	T-ALL	T-ALL	TAL1	notETP	no-ITD	11.3324	-83.6927
SJTALL002072_D1	Stranded_total_RNA_PE100bp	NoFusion	T-ALL	T-ALL	T-other	ETP	no-ITD	9.37937	59.2344
SJTALL002075_D1	Stranded_total_RNA_PE100bp	BPTF-NUTM1	T-ALL	T-ALL	TAL1	notETP	no-ITD	-7.93119	-21.6455
SJTALL002077_D1	Stranded_total_RNA_PE100bp	PARG-BMS1	T-ALL	T-ALL	TLX3	nearETP	no-ITD	62.8053	16.7581
SJTALL002078_D1	Stranded_total_RNA_PE100bp	HOTTIP-SATB1	T-ALL	T-ALL	T-other	nearETP	no-ITD	-14.9073	50.2216
SJTALL002080_D1	Stranded_total_RNA_PE100bp	NoFusion	T-ALL	T-ALL	TLX3	notETP	no-ITD	82.2324	27.5105
SJTALL002089_D1	Stranded_total_RNA_PE100bp	PICALM-MLLT10	T-ALL	T-ALL	PICALM-MLLT10	notETP	no-ITD	37.7115	2.74136
SJTALL002091_D1	Stranded_total_RNA_PE100bp	PICALM-MLLT10	T-ALL	T-ALL	PICALM-MLLT10	notETP	no-ITD	23.5341	11.7035
SJTALL002096_D1	Stranded_total_RNA_PE100bp	NoFusion	T-ALL	T-ALL	TLX1	notETP	no-ITD	89.352	-13.7496
SJTALL002105_D1	Stranded_total_RNA_PE100bp	TLX1-TCRB;ETV6-ABL1	T-ALL	T-ALL	TLX1	notETP	no-ITD	74.3418	-8.14119
SJTALL002109_D1	Stranded_total_RNA_PE100bp	NoFusion	T-ALL	T-ALL	TLX3	ETP	no-ITD	66.669	37.6815
SJTALL002110_D1	Stranded_total_RNA_PE100bp	FOXJ3(coding)-LMO2(intron);MYB-AHI1	T-ALL	T-ALL	nonTCR-LMO2	notETP	no-ITD	30.6313	-42.6164
SJTALL002113_D1	Stranded_total_RNA_PE100bp	SKIV2L2-SIK3	T-ALL	T-ALL	T-other	nearETP	no-ITD	23.8553	39.7077
SJTALL002118_D1	Stranded_total_RNA_PE100bp	TCRB-TAL2;SLC9A3R1-ABL1;MBNL1-ABL1	T-ALL	T-ALL	TAL2	notETP	no-ITD	8.59919	-67.7508
SJTALL002124_D1	Stranded_total_RNA_PE100bp	STIL-TAL1	T-ALL	T-ALL	TAL1	nearETP	no-ITD	-28.0195	-82.6613
SJTALL002125_D1	Stranded_total_RNA_PE100bp	TLX1-TCRB	T-ALL	T-ALL	TLX1	notETP	no-ITD	81.8311	-19.0712
SJTALL002126_D1	Stranded_total_RNA_PE100bp	STIL-TAL1;TBL1XR1-COPB2	T-ALL	T-ALL	TAL1	notETP	no-ITD	-28.3022	-90.3394
SJTALL002130_D1	Stranded_total_RNA_PE100bp	NKX2-8-NKX2-1;STIL-TAL1	T-ALL	T-ALL	NKX2_1	notETP	no-ITD	47.0818	-58.0312
SJTALL002140_D1	Stranded_total_RNA_PE100bp	PCM1-JAK2	T-ALL	T-ALL	TLX3	nearETP	ITD	68.659	26.5322
SJTALL002141_D1	Stranded_total_RNA_PE100bp	BCL11B ASE p.T845M	T-ALL	T-ALL	BCL11B	ETP	no-ITD	-30.1467	103.426
SJTALL002142_D1	Stranded_total_RNA_PE100bp	SFPQ-ZFP36L2	T-ALL	T-ALL	T-other	notETP	no-ITD	27.4751	51.0004
SJTALL002146_D1	Stranded_total_RNA_PE100bp	CDK6-NKX2-1	T-ALL	T-ALL	NKX2_1	notETP	no-ITD	-21.2205	-20.6907
SJTALL002151_D1	Stranded_total_RNA_PE100bp	STIL-TAL1	T-ALL	T-ALL	TAL1	notETP	no-ITD	16.7306	-53.9621
SJTALL002154_D1	Stranded_total_RNA_PE100bp	ASXL2-PFN4	T-ALL	T-ALL	TLX3	notETP	no-ITD	79.737	7.22412
SJTALL002258_D1	Stranded_total_RNA_PE100bp	STIL-TAL1	T-ALL	T-ALL	TAL1	NA	no-ITD	-20.7484	-69.2167
SJTALL012398_D1	Stranded_total_RNA_PE100bp	NUP98-RAP1GDS1	T-ALL	T-ALL	NUP98	ETP	no-ITD	3.00976	57.4492
SJTALL021648_D2	Stranded_total_RNA_PE100bp	TAL1-STIL;HELLS-CSMD1	T-ALL	T-ALL	TAL1	NA	no-ITD	0.320651	-49.0372
SJTALL021655_D2	Stranded_total_RNA_PE100bp	BCL11B-TLX3	T-ALL	T-ALL	TLX3	NA	no-ITD	85.7327	25.7961
SJTALL021661_D2	Stranded_total_RNA_PE100bp	NoFusion	T-ALL	T-ALL	TAL1	NA	no-ITD	26.6048	42.7279
SJTALL021669_D2	Stranded_total_RNA_PE100bp	STIL-TAL1	T-ALL	T-ALL	TAL1	notETP	no-ITD	-28.8134	-94.2093
SJTALL021672_D2	Stranded_total_RNA_PE100bp	KMT2A-CT45A4	T-ALL	T-ALL	KMT2A	nearETP	no-ITD	42.5979	43.3482
SJTALL021674_D2	Stranded_total_RNA_PE100bp	NoFusion	T-ALL	T-ALL	TLX1	notETP	no-ITD	77.3344	-15.8889
SJTALL021675_D2	Stranded_total_RNA_PE100bp	NoFusion	T-ALL	T-ALL	T-other	notETP	no-ITD	56.075	-9.01575
SJTALL021678_D2	Stranded_total_RNA_PE100bp	NUP98-LNP1	T-ALL	T-ALL	NUP98	nearETP	no-ITD	15.498	47.2221
SJTALL021682_D2	Stranded_total_RNA_PE100bp	NoFusion	T-ALL	T-ALL	T-other	ETP	no-ITD	14.5293	61.0577
SJTALL021684_D2	Stranded_total_RNA_PE100bp	TLX1-RPP30	T-ALL	T-ALL	TLX1	notETP	no-ITD	84.0381	-4.43856
SJTALL021685_D2	Stranded_total_RNA_PE100bp	KMT2A-MLLT1	T-ALL	T-ALL	KMT2A	ETP	no-ITD	20.3958	-7.46816
SJTALL021689_D2	Stranded_total_RNA_PE100bp	DDX3X-MLLT10	T-ALL	T-ALL	DDX3X-MLLT10	notETP	no-ITD	42.969	-5.79361
SJTALL021697_D2	Stranded_total_RNA_PE100bp	NoFusion	T-ALL	T-ALL	T-other	notETP	no-ITD	-3.03556	-84.3607
SJTALL021698_D2	Stranded_total_RNA_PE100bp	TCRA-TLX1	T-ALL	T-ALL	TLX1	notETP	no-ITD	74.7175	-15.9948
SJTALL022091_D2	Stranded_total_RNA_PE100bp	LMO2-TRBC1	T-ALL	T-ALL	LMO1/2	NA	no-ITD	2.18926	-86.671
SJTALL022096_D2	Stranded_total_RNA_PE100bp	STIL-TAL1	T-ALL	T-ALL	TAL1	notETP	no-ITD	-2.98275	-88.5477
SJTALL022098_D2	Stranded_total_RNA_PE100bp	TCRA-LMO2	T-ALL	T-ALL	LMO1/2	notETP	no-ITD	3.39431	-75.828
SJTALL022100_D2	Stranded_total_RNA_PE100bp	LINC01550-TLX3	T-ALL	T-ALL	TLX3	notETP	no-ITD	72.9335	31.5191
SJTALL022107_D2	Stranded_total_RNA_PE100bp	LMO2-TRA	T-ALL	T-ALL	LMO1/2	notETP	no-ITD	-15.9259	-89.6968
SJTALL022113_D2	Stranded_total_RNA_PE100bp	TRB-TAL2	T-ALL	T-ALL	TAL2	notETP	no-ITD	9.27589	-64.539
SJTALL022117_D2	Stranded_total_RNA_PE100bp	NoFusion	T-ALL	T-ALL	TLX3	nearETP	no-ITD	68.3848	34.4206
SJTALL022118_D2	Stranded_total_RNA_PE100bp	STMN1-SPI1	T-ALL	T-ALL	SPI1	notETP	no-ITD	-61.1215	120.372
SJTALL022123_D2	Stranded_total_RNA_PE100bp	TCRB-TLX1	T-ALL	T-ALL	TLX1	notETP	no-ITD	77.1685	-9.00883
SJTALL022433_D2	Stranded_total_RNA_PE100bp	PICALM-MLLT10	T-ALL	T-ALL	PICALM-MLLT10	NA	no-ITD	36.345	13.5546
SJTALL022442_D2	Stranded_total_RNA_PE100bp	BCL11B enh amp	T-ALL	T-ALL	BCL11B	ETP	ITD	-38.5534	105.511
SJTALL022447_D2	Stranded_total_RNA_PE100bp	SET-NUP214	T-ALL	T-ALL	SET-NUP214	notETP	no-ITD	35.3886	4.16489
SJTALL022647_D2	Stranded_total_RNA_PE100bp	NoFusion	T-ALL	T-ALL	T-other	ETP	no-ITD	33.0741	46.303
SJTALL022649_D2	Stranded_total_RNA_PE100bp	BCL11B-ARID1B;SETD1A-NLRC3	T-ALL	T-ALL	BCL11B	ETP	no-ITD	-33.8375	100.217
SJTALL022653_D2	Stranded_total_RNA_PE100bp	TLX1-TCRB	T-ALL	T-ALL	TLX1	NA	no-ITD	78.9836	-6.9204
SJTALL022654_D2	Stranded_total_RNA_PE100bp	HOXA10-TRB	T-ALL	T-ALL	HOXA	NA	no-ITD	54.8822	-6.47621
SJTALL022655_D2	Stranded_total_RNA_PE100bp	NoFusion	T-ALL	T-ALL	TLX3	NA	ITD	83.5558	22.1419
SJTALL022656_D2	Stranded_total_RNA_PE100bp	NoFusion	T-ALL	T-ALL	TLX3	NA	no-ITD	77.7344	4.99289
SJTALL022658_D2	Stranded_total_RNA_PE100bp	TRA-TLX1	T-ALL	T-ALL	TLX1	notETP	no-ITD	78.7005	-2.83803
SJTALL022659_D2	Stranded_total_RNA_PE100bp	TRA-TLX1	T-ALL	T-ALL	TLX1	notETP	no-ITD	90.2507	-9.42881
SJTALL022660_D2	Stranded_total_RNA_PE100bp	TCRB-MYB	T-ALL	T-ALL	TLX3	notETP	no-ITD	75.7812	3.41815
SJTALL170_E	Stranded_total_RNA_PE100bp	NUP98-RAP1GDS1	T-ALL	T-ALL	NUP98	ETP	no-ITD	15.5148	58.6364
SJTALL171_E	Stranded_total_RNA_PE100bp	NoFusion	T-ALL	T-ALL	T-other	ETP	ITD	-14.6589	56.1301
SJTALL175_E	Stranded_total_RNA_PE100bp	NoFusion	T-ALL	T-ALL	T-other	ETP	ITD	15.3522	72.9385
SJTALL177_E	Stranded_total_RNA_PE100bp	TLX3-CASC15	T-ALL	T-ALL	BCL11B	ETP	ITD	-23.4276	107.683
SJALL040098_D1	Stranded_total_RNA_PE100bp	DDX3X-MLLT10	T-ALL	T-ALL(GD)	DDX3X-MLLT10	NA	no-ITD	39.262	-5.45698
SJTALL021902_D1	Stranded_total_RNA_PE100bp	KMT2A-MLLT4	T-ALL	T-ALL	KMT2A	NA	no-ITD	23.9256	-10.8384
SJALL040056_D1	Stranded_total_RNA_PE100bp	NoFusion	T-ALL	T-ALL	TLX3	NA	no-ITD	77.2968	18.8336
SJALL040062_D1	Stranded_total_RNA_PE100bp	NoFusion	T-ALL	T-ALL	T-other	NA	no-ITD	-41.5769	-101.505
SJALL040071_D1	Stranded_total_RNA_PE100bp	NoFusion	T-ALL	T-ALL(GD)	TLX3	NA	no-ITD	76.9471	24.2549
SJALL040075_D1	Stranded_total_RNA_PE100bp	NoFusion	T-ALL	T-ALL(GD)	T-other	NA	no-ITD	22.9154	16.775
SJALL040089_D1	Stranded_total_RNA_PE100bp	NoFusion	T-ALL	T-ALL	TLX3	NA	no-ITD	77.4071	1.18132
SJALL040094_D1	Stranded_total_RNA_PE100bp	NoFusion	T-ALL	T-ALL	T-other	NA	no-ITD	-11.1299	-84.0046
SJALL040097_D1	Stranded_total_RNA_PE100bp	NoFusion	T-ALL	T-ALL	NKX2_1	NA	no-ITD	48.8552	-55.234
SJALL040108_D1	Stranded_total_RNA_PE100bp	NoFusion	T-ALL	T-ALL	T-other	NA	no-ITD	10.1342	-89.0691
SJTALL011_D	Stranded_total_RNA_PE100bp	BCL11B-ARID1B	T-ALL	T-ALL	BCL11B	ETP	TKD	-29.2601	113.177
SJTALL021904_D1	Stranded_total_RNA_PE100bp	NoFusion	T-ALL	T-ALL	T-other	NA	no-ITD	9.03937	-57.7166
SJTALL021909_D1	Stranded_total_RNA_PE100bp	NoFusion	T-ALL	T-ALL	T-other	NA	no-ITD	49.3474	40.4224
SJTALL021910_D1	Stranded_total_RNA_PE100bp	NoFusion	T-ALL	T-ALL	TLX1	NA	no-ITD	83.8083	-1.67618
SJTALL021911_D1	Stranded_total_RNA_PE100bp	NoFusion	T-ALL	T-ALL	TLX1	NA	no-ITD	91.0739	-18.0017
SJTALL021912_D1	Stranded_total_RNA_PE100bp	NoFusion	T-ALL	T-ALL	T-other	ETP	no-ITD	10.4673	56.6724
SJTALL021913_D1	Stranded_total_RNA_PE100bp	NoFusion	T-ALL	T-ALL(GD)	T-other	NA	no-ITD	33.9424	-46.2855
SJTALL021914_D1	Stranded_total_RNA_PE100bp	NoFusion	T-ALL	T-ALL	T-other	NA	no-ITD	-13.9023	-80.8791
SJTALL021916_D1	Stranded_total_RNA_PE100bp	NoFusion	T-ALL	T-ALL	T-other	NA	no-ITD	-17.9576	-75.4117
SJTALL021917_D1	Stranded_total_RNA_PE100bp	NoFusion	T-ALL	T-ALL	T-other	NA	no-ITD	-44.0392	-101.3
SJTALL021918_D1	Stranded_total_RNA_PE100bp	NoFusion	T-ALL	T-ALL	T-other	NA	no-ITD	-43.9549	-98.3264
SJTALL021919_D1	Stranded_total_RNA_PE100bp	NoFusion	T-ALL	T-ALL	T-other	NA	no-ITD	-37.7297	-105.942
SJTALL021920_D1	Stranded_total_RNA_PE100bp	NoFusion	T-ALL	T-ALL	T-other	NA	no-ITD	-12.3229	-80.8739
SJTALL022055_D1	Stranded_total_RNA_PE100bp	NoFusion	T-ALL	T-ALL	T-other	NA	no-ITD	-12.8835	-79.388
SJTALL022058_D1	Stranded_total_RNA_PE100bp	NoFusion	T-ALL	T-ALL	T-other	NA	no-ITD	-19.9546	-75.3815
SJTALL022060_D1	Stranded_total_RNA_PE100bp	NoFusion	T-ALL	T-ALL	T-other	NA	no-ITD	9.98428	-99.1035
SJTALL022061_D1	Stranded_total_RNA_PE100bp	NoFusion	T-ALL	T-ALL	T-other	NA	no-ITD	-32.1326	-97.082
SJTALL022062_D1	Stranded_total_RNA_PE100bp	NoFusion	T-ALL	T-ALL	TLX1	NA	no-ITD	86.4367	-11.8987
SJTALL022063_D1	Stranded_total_RNA_PE100bp	NoFusion	T-ALL	T-ALL	NKX2_1	NA	no-ITD	51.2777	-63.1095
SJTALL022065_D1	Stranded_total_RNA_PE100bp	NoFusion	T-ALL	T-ALL	T-other	NA	no-ITD	7.55106	-58.9132
SJTALL022066_D1	Stranded_total_RNA_PE100bp	NoFusion	T-ALL	T-ALL	NKX2_1	NA	no-ITD	51.1111	-60.1454
SJTALL022067_D1	Stranded_total_RNA_PE100bp	NoFusion	T-ALL	T-ALL	T-other	NA	no-ITD	-42.9618	-99.9134
SJALL040121_D1	Stranded_total_RNA_PE100bp	NUP98-KDM5A	T-ALL	T-ALL	NUP98	NA	no-ITD	-9.12276	5.46096
SJTALL021906_D1	Stranded_total_RNA_PE100bp	PICALM-MLLT10	T-ALL	T-ALL	PICALM-MLLT10	NA	no-ITD	26.9411	7.77765
SJTALL022056_D1	Stranded_total_RNA_PE100bp	RUNX1-AFF3;NUP214-ABL1	T-ALL	T-ALL	T-other	NA	no-ITD	43.9758	40.0587
SJALL048367_D3	Stranded_total_RNA_PE100bp	NoFusion	T-ALL	T-ALL(GD)	T-other	NA	no-ITD	33.7982	37.3735
SJALL048390_D1	Stranded_total_RNA_PE100bp	KMT2A-MLLT1	T-ALL	T-ALL(GD)	KMT2A	NA	no-ITD	17.2787	-12.4641
SJTALL022064_D1	Stranded_total_RNA_PE100bp	SET-NUP214	T-ALL	T-ALL(GD)	SET-NUP214	NA	no-ITD	5.63004	59.0187
SJTALL031897_D1	Stranded_total_RNA_PE125bp	BCL11B del	T-ALL	T-ALL	BCL11B	ETP	ITD	-18.4649	111.042
SJALL048358_D3	Stranded_total_RNA_PE100bp	FNDC3B-GOLGA4	T-ALL	T-ALL	T-other	ETP	no-ITD	-13.1644	54.9402
SJALL048448_D1	Stranded_total_RNA_PE100bp	NoFusion	T-ALL	T-ALL	T-other	ETP	no-ITD	-26.1032	47.5194
SJALL048462_D2	Stranded_total_RNA_PE100bp	ETV6-CTNNB1	T-ALL	T-ALL	T-other	ETP	no-ITD	3.23118	76.7499
SJMPAL011911_D1	Stranded_total_RNA_PE100bp	NoFusion	MPAL	MPAL(T/M)	BCL11B	MPAL	ITD	-32.7988	108.194
SJTALL067425_C1	stranded_mRNA_PE150bp	DDX3X-MLLT10	T-ALL	T-ALL	T-other	NA	no-ITD	18.5854	0.502652
SJTALL067426_C1	stranded_mRNA_PE150bp	TCRA-TAL1	T-ALL	T-ALL	T-other	NA	no-ITD	8.12057	-99.1018
SJTALL067427_C1	stranded_mRNA_PE150bp	NoFusion	T-ALL	T-ALL	T-other	NA	no-ITD	9.82833	-82.3737
SJTALL067428_C1	stranded_mRNA_PE150bp	STIL-TAL1	T-ALL	T-ALL	T-other	NA	no-ITD	-11.2887	-45.7393
SJTALL067429_C1	stranded_mRNA_PE150bp	MED14-HOXA9	T-ALL	T-ALL	HOXA	NA	no-ITD	0.0248723	77.5474
SJTALL067430_C1	stranded_mRNA_PE150bp	NKX2-2-TGIF1;TCRB-NKX2-4	T-ALL	T-ALL	T-other	NA	no-ITD	55.0987	-64.313
SJTALL067431_C1	stranded_mRNA_PE150bp	PICALM-MLLT10	T-ALL	T-ALL	T-other	NA	no-ITD	36.2204	11.1919
SJTALL067432_C1	stranded_mRNA_PE150bp	NoFusion	T-ALL	T-ALL	T-other	NA	no-ITD	9.5071	-87.7599
SJTALL067433_C1	stranded_mRNA_PE150bp	NoFusion	T-ALL	T-ALL	T-other	NA	no-ITD	5.72885	-99.925
SJTALL067434_C1	stranded_mRNA_PE150bp	NoFusion	T-ALL	T-ALL	T-other	NA	no-ITD	-37.9401	-77.4228
SJTALL067435_C1	stranded_mRNA_PE150bp	NoFusion	T-ALL	T-ALL	TLX3	NA	no-ITD	79.8786	8.75682
SJTALL067437_C1	stranded_mRNA_PE150bp	NoFusion	T-ALL	T-ALL	BCL11B	NA	no-ITD	-31.0384	101.752
SJTALL067438_C1	stranded_mRNA_PE150bp	NoFusion	T-ALL	T-ALL	TLX1	NA	no-ITD	84.0485	-13.588
SJTALL067439_C1	stranded_mRNA_PE150bp	NoFusion	T-ALL	T-ALL	T-other	NA	no-ITD	31.1175	48.8134
SJTALL067440_C1	stranded_mRNA_PE150bp	NoFusion	T-ALL	T-ALL	T-other	NA	no-ITD	-6.5758	-55.1403
SJTALL067441_C1	stranded_mRNA_PE150bp	NoFusion	T-ALL	T-ALL	nonTCR-LMO2	NA	no-ITD	30.0412	-35.6775
SJTALL067442_C1	stranded_mRNA_PE150bp	NoFusion	T-ALL	T-ALL	T-other	NA	no-ITD	-17.5648	-10.7098
SJTALL067443_C1	stranded_mRNA_PE150bp	NoFusion	T-ALL	T-ALL	T-other	NA	no-ITD	-20.7759	-19.4665
SJTALL067444_C1	stranded_mRNA_PE150bp	NoFusion	T-ALL	T-ALL	TLX1	NA	no-ITD	85.5895	-9.89624
SJTALL067445_C1	stranded_mRNA_PE150bp	NoFusion	T-ALL	T-ALL	nonTCR-LMO2	NA	no-ITD	28.6056	-34.5809
SJTALL067446_C1	stranded_mRNA_PE150bp	NoFusion	T-ALL	T-ALL	TLX3	NA	no-ITD	57.6587	30.8566
SJTALL067447_C1	stranded_mRNA_PE150bp	NoFusion	T-ALL	T-ALL	TLX1	NA	no-ITD	62.9806	9.05854
SJTALL067448_C1	stranded_mRNA_PE150bp	NoFusion	T-ALL	T-ALL	T-other	NA	no-ITD	-2.47253	-90.1544
SJTALL067449_C1	stranded_mRNA_PE150bp	TCRB-HOXA11	T-ALL	T-ALL	HOXA	NA	no-ITD	58.5259	-7.38403
SJTALL067450_C1	stranded_mRNA_PE150bp	NoFusion	T-ALL	T-ALL	TLX1	NA	no-ITD	72.9308	-14.096
SJTALL067451_C1	stranded_mRNA_PE150bp	NoFusion	T-ALL	T-ALL	T-other	NA	no-ITD	17.1007	61.6302
SJTALL067452_C1	stranded_mRNA_PE150bp	NoFusion	T-ALL	T-ALL	T-other	NA	no-ITD	-20.2223	-11.1333
SJTALL067453_C1	stranded_mRNA_PE150bp	NoFusion	T-ALL	T-ALL	T-other	NA	no-ITD	-2.8314	-57.3589
SJTALL067454_C1	stranded_mRNA_PE150bp	NoFusion	T-ALL	T-ALL	T-other	NA	no-ITD	28.9739	-54.9371
SJTALL067455_C1	stranded_mRNA_PE150bp	NoFusion	T-ALL	T-ALL	T-other	NA	no-ITD	33.3214	40.4837
SJTALL067456_C1	stranded_mRNA_PE150bp	STIL-TAL1	T-ALL	T-ALL	T-other	NA	no-ITD	-39.135	-77.6904
SJTALL067457_C1	stranded_mRNA_PE150bp	KMT2A-MLLT1	T-ALL	T-ALL	T-other	NA	no-ITD	26.4471	-14.8462
SJTALL067458_C1	stranded_mRNA_PE150bp	NoFusion	T-ALL	T-ALL	T-other	NA	no-ITD	-1.77824	-69.2283
SJTALL067459_C1	stranded_mRNA_PE150bp	NoFusion	T-ALL	T-ALL	TLX3	NA	no-ITD	60.155	29.7037
SJTALL067460_C1	stranded_mRNA_PE150bp	NoFusion	T-ALL	T-ALL	nonTCR-LMO2	NA	no-ITD	31.9495	-35.5827
SJTALL067461_C1	stranded_mRNA_PE150bp	NoFusion	T-ALL	T-ALL	T-other	NA	no-ITD	-4.65616	52.2136
SJTALL067462_C1	stranded_mRNA_PE150bp	NoFusion	T-ALL	T-ALL	T-other	NA	no-ITD	-33.7573	51.313
SJTALL067463_C1	stranded_mRNA_PE150bp	NoFusion	T-ALL	T-ALL	T-other	NA	no-ITD	8.89018	-92.6128
SJTALL067464_C1	stranded_mRNA_PE150bp	NoFusion	T-ALL	T-ALL	T-other	NA	no-ITD	-10.9111	-19.6803
SJTALL067465_C1	stranded_mRNA_PE150bp	NoFusion	T-ALL	T-ALL	T-other	NA	no-ITD	-38.9898	-80.0424
SJTALL067466_C1	stranded_mRNA_PE150bp	NoFusion	T-ALL	T-ALL	T-other	NA	no-ITD	-17.8566	-15.7306
SJTALL067467_C1	stranded_mRNA_PE150bp	KMT2A-MLLT1	T-ALL	T-ALL	T-other	NA	no-ITD	16.6274	-10.8356
SJTALL067468_C1	stranded_mRNA_PE150bp	NoFusion	T-ALL	T-ALL	T-other	NA	no-ITD	29.5318	47.1866
SJTALL067469_C1	stranded_mRNA_PE150bp	NoFusion	T-ALL	T-ALL	TLX3	NA	no-ITD	64.5263	9.88507
SJTALL067470_C1	stranded_mRNA_PE150bp	NoFusion	T-ALL	T-ALL	TLX1	NA	no-ITD	84.6419	-6.82301
SJTALL067471_C1	stranded_mRNA_PE150bp	STIL-TAL1	T-ALL	T-ALL	T-other	NA	no-ITD	2.05635	-92.3987
SJTALL067472_C1	stranded_mRNA_PE150bp	NoFusion	T-ALL	T-ALL	T-other	NA	no-ITD	45.5659	41.4264
SJTALL067473_C1	stranded_mRNA_PE150bp	KMT2A-MLLT3	T-ALL	T-ALL	T-other	NA	no-ITD	20.9686	-3.77849
SJTALL067474_C1	stranded_mRNA_PE150bp	SET-NUP214	T-ALL	T-ALL	T-other	NA	no-ITD	57.2292	-2.5899
SJTALL067475_C1	stranded_mRNA_PE150bp	LIPA-KCNH5	T-ALL	T-ALL	T-other	NA	no-ITD	-43.3846	-70.5148
SJTALL067476_C1	stranded_mRNA_PE150bp	STIL-TAL1	T-ALL	T-ALL	T-other	NA	no-ITD	-27.1565	-85.3526
SJTALL067477_C1	stranded_mRNA_PE150bp	TCRB-HOXA11	T-ALL	T-ALL	HOXA	NA	no-ITD	58.2392	-9.09833
SJTALL067478_C1	stranded_mRNA_PE150bp	NoFusion	T-ALL	T-ALL	T-other	NA	no-ITD	-25.7134	-84.0866
SJTALL067479_C1	stranded_mRNA_PE150bp	NoFusion	T-ALL	T-ALL	T-other	NA	no-ITD	-30.6271	-89.6966
SJTALL067480_C1	stranded_mRNA_PE150bp	NoFusion	T-ALL	T-ALL	TLX1	NA	no-ITD	82.4326	-3.7163
SJTALL067481_C1	stranded_mRNA_PE150bp	NUP214-ABL1	T-ALL	T-ALL	TLX3	NA	no-ITD	68.4045	28.9859
SJTALL067482_C1	stranded_mRNA_PE150bp	TAL1-PDZK1IP1	T-ALL	T-ALL	T-other	NA	no-ITD	-42.1961	-78.1285
SJTALL067483_C1	stranded_mRNA_PE150bp	STIL-TAL1	T-ALL	T-ALL	T-other	NA	no-ITD	-41.6001	-79.3797
SJTALL067484_C1	stranded_mRNA_PE150bp	NoFusion	T-ALL	T-ALL	TLX1	NA	no-ITD	90.8519	-23.8521
SJTALL067485_C1	stranded_mRNA_PE150bp	NoFusion	T-ALL	T-ALL	T-other	NA	no-ITD	2.53005	-68.1318
SJTALL067486_C1	stranded_mRNA_PE150bp	NoFusion	T-ALL	T-ALL	TLX3	NA	no-ITD	56.3092	30.2527
SJTALL067487_C1	stranded_mRNA_PE150bp	KMT2A-MLLT4	T-ALL	T-ALL	T-other	NA	no-ITD	22.9569	-5.65627
SJTALL067488_C1	stranded_mRNA_PE150bp	NoFusion	T-ALL	T-ALL	T-other	NA	no-ITD	-4.09597	-48.7992
SJTALL067490_C1	stranded_mRNA_PE150bp	NoFusion	T-ALL	T-ALL	T-other	NA	no-ITD	30.1444	-52.6441
SJTALL067491_C1	stranded_mRNA_PE150bp	NAP1L1-MLLT10	T-ALL	T-ALL	T-other	NA	no-ITD	5.61943	56.116
SJTALL067492_C1	stranded_mRNA_PE150bp	STIL-TAL1	T-ALL	T-ALL	T-other	NA	no-ITD	-30.3285	-86.93
SJTALL067494_C1	stranded_mRNA_PE150bp	TARP-TAL1;NUP214-ABL1	T-ALL	T-ALL	T-other	NA	no-ITD	-17.2817	-91.2231
SJTALL067495_C1	stranded_mRNA_PE150bp	NoFusion	T-ALL	T-ALL	TLX3	NA	no-ITD	81.2084	31.3913
SJTALL067496_C1	stranded_mRNA_PE150bp	NoFusion	T-ALL	T-ALL	T-other	NA	no-ITD	-14.2349	-39.5296
SJTALL067497_C1	stranded_mRNA_PE150bp	ETV6-CTNNB1	T-ALL	T-ALL	T-other	NA	no-ITD	-6.87103	72.1729
SJTALL067498_C1	stranded_mRNA_PE150bp	NoFusion	T-ALL	T-ALL	BCL11B	NA	ITD	-32.3787	101.296
SJTALL067499_C1	stranded_mRNA_PE150bp	TCF7-SPI1	T-ALL	T-ALL	SPI1	NA	no-ITD	-58.5959	117.769
SJAML040669_D1	Unstranded_mRNA_PE75bp	NUP98-BRWD3	AML	AML	NUP98	AML	no-ITD	-43.0063	11.1149
SJAML040671_D1	Unstranded_mRNA_PE75bp	NUP98-NDS1	AML	AML	NUP98	AML	ITD	-39.4544	8.95368
SJAML040672_D1	Unstranded_mRNA_PE75bp	NoFusion	AML	AML	AML-other	AML	no-ITD	-36.2561	28.5131
SJAML040673_D1	Unstranded_mRNA_PE75bp	BCL11B-ARID1B	AML	AML	BCL11B	AML	TKD	-12.2519	107.292
SJAML040674_D1	Unstranded_mRNA_PE75bp	NoFusion	AML	AML	AML-other	AML	no-ITD	-57.8818	-8.3247
SJAML040675_D1	Unstranded_mRNA_PE75bp	NoFusion	AML	AML	AML-other	AML	no-ITD	-31.1564	-25.0292
SJAML040676_D1	Unstranded_mRNA_PE75bp	NUP98-NSD1	AML	AML	NUP98	AML	no-ITD	-39.6233	6.76282
SJAML040677_D1	Unstranded_mRNA_PE75bp	HNRNPH1-ERG	AML	AML	AML-other	AML	no-ITD	-33.941	4.30488
SJAML040678_D1	Unstranded_mRNA_PE75bp	NUP98-NSD1	AML	AML	NUP98	AML	ITD	-42.2893	3.34123
SJAML040679_D1	Unstranded_mRNA_PE75bp	NUP98-NSD1	AML	AML	NUP98	AML	no-ITD	-40.9504	9.35328
SJAML040680_D1	Unstranded_mRNA_PE75bp	BCL11B-ARID1B	AML	AML	BCL11B	AML	TKD	-12.4917	105.152
SJAML040681_D1	Unstranded_mRNA_PE75bp	ETV6-BCL11B	AML	AML	BCL11B	AML	ITD	-14.5903	112.066
SJAML040682_D1	Unstranded_mRNA_PE75bp	KMT2A-MLLT3	AML	AML	KMT2A	AML	no-ITD	-60.5883	-9.54759
SJAML040683_D1	Unstranded_mRNA_PE75bp	RUNX1-RUNX1T1	AML	AML	RUNX1-RUNX1T1	AML	no-ITD	-56.1725	52.039
SJAML040684_D1	Unstranded_mRNA_PE75bp	CDK6-BCL11B	AML	AML	BCL11B	AML	no-ITD	-10.4897	106.791
SJAML040685_D1	Unstranded_mRNA_PE75bp	PICALM-MLLT10	AML	AML	PICALM-MLLT10	AML	no-ITD	27.5478	61.0184
SJAML040686_D1	Unstranded_mRNA_PE75bp	DDX3X-MLLT10	AML	AML	DDX3X-MLLT10	AML	no-ITD	37.0685	19.1609
SJAML040688_D1	Unstranded_mRNA_PE75bp	NoFusion	AML	AML	AML-other	AML	no-ITD	-35.6031	1.03346
SJAML040689_D1	Unstranded_mRNA_PE75bp	BCL11B enh amp	AML	AML	BCL11B	AML	ITD	-14.4848	110.836
SJAML040690_D1	Unstranded_mRNA_PE75bp	KMT2A-MLLT10	AML	AML	KMT2A	AML	no-ITD	-59.5676	-8.58526
SJAML040691_D1	Unstranded_mRNA_PE75bp	NoFusion	AML	AML	AML-other	AML	no-ITD	-36.3956	2.78299
SJAML040692_D1	Unstranded_mRNA_PE75bp	NoFusion	AML	AML	AML-other	AML	no-ITD	-29.0224	29.6638
SJAML040693_D1	Unstranded_mRNA_PE75bp	NUP98-NSD1	AML	AML	NUP98	AML	no-ITD	-38.3259	4.47448
SJAML040694_D1	Unstranded_mRNA_PE75bp	RBM15-MKL1	AML	AML	AML-other	AML	no-ITD	-32.313	-24.5854
SJAML040695_D1	Unstranded_mRNA_PE75bp	BCL11B-ARID1B	AML	AML	BCL11B	AML	no-ITD	-11.8419	110.578
SJAML040696_D1	Unstranded_mRNA_PE75bp	NoFusion	AML	AML	AML-other	AML	no-ITD	-38.4684	2.69484
SJAML040710_D3	Unstranded_mRNA_PE75bp	NUP98-NSD1	AML	AML	NUP98	AML	ITD	-43.3974	3.13608
SJAML040498_D1	Unstranded_mRNA_PE75bp	NoFusion	AML	AML	BCL11B	AML	ITD	-15.2997	106.519
SJAML040499_D1	Unstranded_mRNA_PE75bp	NUP98-NSD1	AML	AML	NUP98	AML	no-ITD	-22.4849	-26.3453
SJAML040500_D1	Unstranded_mRNA_PE75bp	NoFusion	AML	AML	AML-other	AML	no-ITD	-31.3642	13.1526
SJAML040501_D1	Unstranded_mRNA_PE75bp	NoFusion	AML	AML	AML-other	AML	no-ITD	-76.4216	-0.619566
SJAML040502_D1	Unstranded_mRNA_PE75bp	MLLT10-AMICA1	AML	AML	AML-other	AML	no-ITD	-64.6498	-0.19429
SJAML040504_D1	Unstranded_mRNA_PE75bp	NPM1-MLF1	AML	AML	AML-other	AML	ITD	-31.2291	24.0728
SJAML040505_D1	Unstranded_mRNA_PE75bp	CBFB-MYH11	AML	AML	CBFB-MYH11	AML	no-ITD	-85.6621	65.6474
SJAML040506_D1	Unstranded_mRNA_PE75bp	NoFusion	AML	AML	AML-other	AML	no-ITD	-28.0433	22.0608
SJAML040507_D1	Unstranded_mRNA_PE75bp	KMT2A-MLLT3	AML	AML	KMT2A	AML	no-ITD	-62.2038	-1.60999
SJAML040508_D1	Unstranded_mRNA_PE75bp	NUP98-KDM5A;KDM5A-SIAH3;ZBTB16-SCN10A;CHEK1-RTN3	AML	AML	NUP98	AML	no-ITD	-43.4533	-21.9628
SJAML040509_D1	Unstranded_mRNA_PE75bp	NoFusion	AML	AML	AML-other	AML	no-ITD	-12.6085	-1.42973
SJAML040510_D1	Unstranded_mRNA_PE75bp	KMT2A-MLLT3	AML	AML	KMT2A	AML	no-ITD	-63.0859	1.8015
SJAML040511_D1	Unstranded_mRNA_PE75bp	ELL-KMT2A;TTYH3-LFNG;NCAPH2-PLXNB2	AML	AML	KMT2A	AML	no-ITD	-61.4546	6.17514
SJAML040512_D1	Unstranded_mRNA_PE75bp	NoFusion	AML	AML	AML-other	AML	no-ITD	-16.791	16.965
SJAML040513_D1	Unstranded_mRNA_PE75bp	NoFusion	AML	AML	AML-other	AML	no-ITD	-32.772	13.2652
SJAML040514_D1	Unstranded_mRNA_PE75bp	NUP98-KDM5A;PRKCB-PGK1;PGK1-MPP6;MPP6-ATAD1;ATAD1-IL21R	AML	AML	NUP98	AML	no-ITD	-37.721	-22.9646
SJAML040515_D1	Unstranded_mRNA_PE75bp	RUNX1-RUNX1T1	AML	AML	RUNX1-RUNX1T1	AML	no-ITD	-58.3304	56.3272
SJAML040516_D1	Unstranded_mRNA_PE75bp	RUNX1-RUNX1T1	AML	AML	RUNX1-RUNX1T1	AML	no-ITD	-60.4532	66.5489
SJAML040518_D1	Unstranded_mRNA_PE75bp	KMT2A-MLLT10;TFDP2-XRN1	AML	AML	KMT2A	AML	no-ITD	-37.1464	-24.621
SJAML040521_D1	Unstranded_mRNA_PE75bp	GLOD4-AASDHPPT	AML	AML	AML-other	AML	no-ITD	-80.386	71.5999
SJAML040522_D1	Unstranded_mRNA_PE75bp	NoFusion	AML	AML	AML-other	AML	no-ITD	10.324	34.8376
SJAML040524_D1	Unstranded_mRNA_PE75bp	NoFusion	AML	AML	AML-other	AML	no-ITD	-35.1901	17.3898
SJAML040525_D1	Unstranded_mRNA_PE75bp	KMT2A-MLLT3	AML	AML	KMT2A	AML	no-ITD	-70.6916	-2.07473
SJAML040527_D1	Unstranded_mRNA_PE75bp	MLLT4-KMT2A	AML	AML	KMT2A	AML	no-ITD	-55.3611	2.81314
SJAML040528_D1	Unstranded_mRNA_PE75bp	NoFusion	AML	AML	AML-other	AML	no-ITD	-74.1832	0.201859
SJAML040529_D1	Unstranded_mRNA_PE75bp	KDM5A-NUP98	AML	AML	NUP98	AML	no-ITD	-65.9471	5.67828
SJAML040530_D1	Unstranded_mRNA_PE75bp	RUNX1-RUNX1T1	AML	AML	RUNX1-RUNX1T1	AML	no-ITD	-69.7874	59.149
SJAML040533_D1	Unstranded_mRNA_PE75bp	KMT2A-MLLT3	AML	AML	KMT2A	AML	no-ITD	-64.0887	-2.48852
SJAML040536_D1	Unstranded_mRNA_PE75bp	KMT2A-MLLT3	AML	AML	KMT2A	AML	no-ITD	-72.4396	1.35643
SJAML040537_D1	Unstranded_mRNA_PE75bp	NoFusion	AML	AML	AML-other	AML	no-ITD	-7.46635	25.0947
SJAML040538_D1	Unstranded_mRNA_PE75bp	RUNX1-RUNX1T1	AML	AML	RUNX1-RUNX1T1	AML	no-ITD	-67.5803	63.6052
SJAML040541_D1	Unstranded_mRNA_PE75bp	NoFusion	AML	AML	AML-other	AML	no-ITD	-25.1052	19.165
SJAML040542_D1	Unstranded_mRNA_PE75bp	NoFusion	AML	AML	AML-other	AML	no-ITD	-26.6247	18.2809
SJAML040543_D1	Unstranded_mRNA_PE75bp	RUNX1-RUNX1T1	AML	AML	RUNX1-RUNX1T1	AML	no-ITD	-67.9576	57.7947
SJAML040544_D1	Unstranded_mRNA_PE75bp	NoFusion	AML	AML	AML-other	AML	no-ITD	6.3561	33.9629
SJAML040545_D1	Unstranded_mRNA_PE75bp	NoFusion	AML	AML	AML-other	AML	no-ITD	-14.2484	-3.65233
SJAML040546_D1	Unstranded_mRNA_PE75bp	RUNX1-RUNX1T1	AML	AML	RUNX1-RUNX1T1	AML	no-ITD	-74.2485	59.1882
SJAML040550_D1	Unstranded_mRNA_PE75bp	FUS-FLI1;GATC-COX6A1;DCTPP1-PYCARDOS	AML	AML	AML-other	AML	no-ITD	-2.87673	35.747
SJAML040552_D1	Unstranded_mRNA_PE75bp	CBFB-MYH11	AML	AML	CBFB-MYH11	AML	no-ITD	-87.8963	69.7898
SJAML040555_D1	Unstranded_mRNA_PE75bp	RUNX1-RUNX1T1	AML	AML	RUNX1-RUNX1T1	AML	no-ITD	-69.4891	61.9199
SJAML040557_D1	Unstranded_mRNA_PE75bp	CBFB-MYH11	AML	AML	CBFB-MYH11	AML	no-ITD	-90.7412	71.3183
SJAML040558_D1	Unstranded_mRNA_PE75bp	NoFusion	AML	AML	AML-other	AML	no-ITD	-86.1843	70.6591
SJAML040559_D1	Unstranded_mRNA_PE75bp	KMT2A PTD	AML	AML	AML-other	AML	ITD	-30.8997	25.6332
SJAML040563_D1	Unstranded_mRNA_PE75bp	NoFusion	AML	AML	AML-other	AML	no-ITD	-41.1242	-21.1833
SJAML040565_D1	Unstranded_mRNA_PE75bp	RUNX1-RUNX1T1	AML	AML	RUNX1-RUNX1T1	AML	no-ITD	-72.7462	59.2912
SJAML040569_D1	Unstranded_mRNA_PE75bp	NoFusion	AML	AML	AML-other	AML	no-ITD	-87.7415	75.1383
SJAML040570_D1	Unstranded_mRNA_PE75bp	DEK-NUP214	AML	AML	AML-other	AML	no-ITD	-26.0288	11.6319
SJAML040574_D1	Unstranded_mRNA_PE75bp	KMT2A-MLLT10;UBE4A-KMT2A;CBL-CBL	AML	AML	KMT2A	AML	no-ITD	-72.2406	3.27802
SJAML040575_D1	Unstranded_mRNA_PE75bp	NoFusion	AML	AML	AML-other	AML	TKD	-48.6542	13.6381
SJAML040576_D1	Unstranded_mRNA_PE75bp	KMT2A-MLLT3	AML	AML	KMT2A	AML	no-ITD	-76.2838	3.40271
SJAML040577_D1	Unstranded_mRNA_PE75bp	MLLT10-GAD2	AML	AML	AML-other	AML	no-ITD	-69.4172	3.65915
SJAML040578_D1	Unstranded_mRNA_PE75bp	KMT2A-SARNP	AML	AML	KMT2A	AML	no-ITD	-59.0422	1.45647
SJAML040579_D1	Unstranded_mRNA_PE75bp	CBFA2T3-GLIS2;CBL-CBL	AML	AML	AML-other	AML	no-ITD	-35.6766	-31.9428
SJAML040582_D1	Unstranded_mRNA_PE75bp	RUNX1-RUNX1T1;HEXA-LMAN1L;CSK-CLIC6;BRWD1-HEXA	AML	AML	RUNX1-RUNX1T1	AML	no-ITD	-73.1152	54.0448
SJAML040583_D1	Unstranded_mRNA_PE75bp	NoFusion	AML	AML	AML-other	AML	no-ITD	-42.8686	-19.3343
SJAML040584_D1	Unstranded_mRNA_PE75bp	CBFB-MYH11	AML	AML	CBFB-MYH11	AML	ITD	-85.258	72.6677
SJAML040585_D1	Unstranded_mRNA_PE75bp	RUNX1-RUNX1T1	AML	AML	RUNX1-RUNX1T1	AML	no-ITD	-69.5268	56.49
SJAML040586_D1	Unstranded_mRNA_PE75bp	PICALM-MLLT10;RBM14-GLCCI1;CELF1-SDK1	AML	AML	PICALM-MLLT10	AML	no-ITD	14.0703	17.8917
SJAML040588_D1	Unstranded_mRNA_PE75bp	KMT2A-MLLT4	AML	AML	KMT2A	AML	no-ITD	23.1004	-8.00604
SJAML040589_D1	Unstranded_mRNA_PE75bp	NoFusion	AML	AML	AML-other	AML	ITD	-31.0503	22.0097
SJAML040590_D1	Unstranded_mRNA_PE75bp	CBFB-MYH11	AML	AML	CBFB-MYH11	AML	no-ITD	-84.8243	67.5728
SJAML040591_D1	Unstranded_mRNA_PE75bp	RUNX1-RUNX1T1	AML	AML	RUNX1-RUNX1T1	AML	no-ITD	-72.7606	51.1378
SJAML040592_D1	Unstranded_mRNA_PE75bp	KMT2A-MLLT4	AML	AML	KMT2A	AML	no-ITD	-54.7638	-3.59281
SJAML040594_D1	Unstranded_mRNA_PE75bp	KMT2A-MLLT3	AML	AML	KMT2A	AML	no-ITD	-64.6608	3.04392
SJAML040596_D1	Unstranded_mRNA_PE75bp	CBFB-MYH11;TRMT1L-SWT1;RBM25-ZFYVE1	AML	AML	CBFB-MYH11	AML	no-ITD	-88.6275	72.6583
SJAML040597_D1	Unstranded_mRNA_PE75bp	CBL-CBL	AML	AML	AML-other	AML	no-ITD	-11.8804	0.0160394
SJAML040598_D1	Unstranded_mRNA_PE75bp	CBFB-MYH11	AML	AML	CBFB-MYH11	AML	no-ITD	-86.3703	76.4204
SJAML040599_D1	Unstranded_mRNA_PE75bp	NUP98-PHF23	AML	AML	NUP98	AML	no-ITD	-31.311	19.9094
SJAML040600_D1	Unstranded_mRNA_PE75bp	CBFB-MYH11	AML	AML	CBFB-MYH11	AML	no-ITD	-77.6918	61.4187
SJAML040601_D1	Unstranded_mRNA_PE75bp	CBFB-MYH11;NDE1-CBFB	AML	AML	CBFB-MYH11	AML	no-ITD	-85.6438	74.6422
SJAML040603_D1	Unstranded_mRNA_PE75bp	NDE1-CBFB	AML	AML	AML-other	AML	no-ITD	-83.1213	72.2904
SJAML040606_D1	Unstranded_mRNA_PE75bp	RUNX1-RUNX1T1;CBL-CBL	AML	AML	RUNX1-RUNX1T1	AML	no-ITD	-57.146	62.8772
SJAML040607_D1	Unstranded_mRNA_PE75bp	NoFusion	AML	AML	AML-other	AML	ITD	-33.0582	22.0232
SJAML040608_D1	Unstranded_mRNA_PE75bp	NPM1-MLF1	AML	AML	AML-other	AML	ITD	-30.1111	17.8803
SJAML040609_D1	Unstranded_mRNA_PE75bp	KMT2A-MLLT3	AML	AML	KMT2A	AML	no-ITD	-66.7406	2.96642
SJAML040610_D1	Unstranded_mRNA_PE75bp	CBFB-MYH11;RCOR1-TECPR2	AML	AML	CBFB-MYH11	AML	no-ITD	-80.027	67.2382
SJAML040611_D1	Unstranded_mRNA_PE75bp	NUP98-KDM5A	AML	AML	NUP98	AML	no-ITD	-39.381	-24.1728
SJAML040612_D1	Unstranded_mRNA_PE75bp	NoFusion	AML	AML	AML-other	AML	no-ITD	-6.89453	26.3301
SJAML040613_D1	Unstranded_mRNA_PE75bp	CBFB-MYH11	AML	AML	CBFB-MYH11	AML	no-ITD	-86.8605	67.4508
SJAML040614_D1	Unstranded_mRNA_PE75bp	NoFusion	AML	AML	AML-other	AML	no-ITD	-38.0034	15.0741
SJAML040615_D1	Unstranded_mRNA_PE75bp	ETV6-INO80D	AML	AML	AML-other	AML	no-ITD	8.41453	46.8242
SJAML040616_D1	Unstranded_mRNA_PE75bp	RUNX1-RUNX1T1	AML	AML	RUNX1-RUNX1T1	AML	no-ITD	-70.4822	63.0039
SJAML040617_D1	Unstranded_mRNA_PE75bp	NoFusion	AML	AML	AML-other	AML	no-ITD	8.69226	33.7399
SJAML040620_D1	Unstranded_mRNA_PE75bp	IL3RA-CSF2RA	AML	AML	AML-other	AML	no-ITD	-62.3258	4.88046
SJAML040622_D1	Unstranded_mRNA_PE75bp	STAG2-HOXA10	AML	AML	HOXA	AML	no-ITD	-40.4636	-22.9328
SJAML040623_D1	Unstranded_mRNA_PE75bp	NoFusion	AML	AML	AML-other	AML	no-ITD	-62.4315	-4.24392
SJAML040625_D1	Unstranded_mRNA_PE75bp	CBFA2T3-GLIS2	AML	AML	AML-other	AML	no-ITD	-34.5638	-31.4351
SJAML040626_D1	Unstranded_mRNA_PE75bp	CBFB-MYH11	AML	AML	CBFB-MYH11	AML	no-ITD	-86.8101	72.2597
SJAML040628_D1	Unstranded_mRNA_PE75bp	KMT2A-MLLT10	AML	AML	KMT2A	AML	no-ITD	-58.7996	-2.20237
SJAML040629_D1	Unstranded_mRNA_PE75bp	SCAMP1-AP3B1	AML	AML	AML-other	AML	no-ITD	-28.3289	13.6691
SJAML040630_D1	Unstranded_mRNA_PE75bp	NUP98-NSD1	AML	AML	NUP98	AML	no-ITD	-26.2382	20.9479
SJAML040632_D1	Unstranded_mRNA_PE75bp	RUNX1-RUNX1T1	AML	AML	RUNX1-RUNX1T1	AML	no-ITD	-69.8251	53.2324
SJAML040634_D1	Unstranded_mRNA_PE75bp	PTBP1-PALM	AML	AML	AML-other	AML	no-ITD	-16.3602	4.26872
SJAML040635_D1	Unstranded_mRNA_PE75bp	UBTF-UBTF;HNRNPL-RINL	AML	AML	AML-other	AML	no-ITD	-34.5829	-0.704062
SJAML040641_D1	Unstranded_mRNA_PE75bp	CBFB-MYH11	AML	AML	CBFB-MYH11	AML	no-ITD	-84.597	69.7278
SJAML040643_D1	Unstranded_mRNA_PE75bp	NoFusion	AML	AML	AML-other	AML	no-ITD	-17.7421	16.4835
SJAML040645_D1	Unstranded_mRNA_PE75bp	NUP98-NSD1	AML	AML	NUP98	AML	no-ITD	-47.4566	15.6069
SJAML040646_D1	Unstranded_mRNA_PE75bp	NoFusion	AML	AML	AML-other	AML	no-ITD	11.5434	35.839
SJAML040647_D1	Unstranded_mRNA_PE75bp	NoFusion	AML	AML	AML-other	AML	no-ITD	-74.3855	3.3367
SJAML040648_D1	Unstranded_mRNA_PE75bp	CBFA2T3-GLIS2	AML	AML	AML-other	AML	no-ITD	-30.9242	-31.3294
SJAML040649_D1	Unstranded_mRNA_PE75bp	KMT2A-ELL	AML	AML	KMT2A	AML	no-ITD	-51.1394	9.95715
SJAML040650_D1	Unstranded_mRNA_PE75bp	KMT2A-SEPT5;NECAP1-PRKAG1	AML	AML	KMT2A	AML	no-ITD	-59.034	2.70376
SJAML040651_D1	Unstranded_mRNA_PE75bp	CBFA2T3-GLIS2	AML	AML	AML-other	AML	no-ITD	-29.5689	-31.5992
SJAML040652_D1	Unstranded_mRNA_PE75bp	KMT2A-MLLT1	AML	AML	KMT2A	AML	no-ITD	-77.9033	-0.0426313
SJAML040654_D1	Unstranded_mRNA_PE75bp	NoFusion	AML	AML	AML-other	AML	no-ITD	-25.0434	13.6143
SJAML040656_D1	Unstranded_mRNA_PE75bp	UBTF-UBTF	AML	AML	AML-other	AML	no-ITD	-22.9407	20.3446
SJAML040657_D1	Unstranded_mRNA_PE75bp	RUNX1-RUNX1T1;NOP14-GRK4	AML	AML	RUNX1-RUNX1T1	AML	no-ITD	-71.0157	51.0759
SJAML040659_D1	Unstranded_mRNA_PE75bp	RUNX1-RUNX1T1	AML	AML	RUNX1-RUNX1T1	AML	TKD	-71.5682	53.3332
SJAML040661_D1	Unstranded_mRNA_PE75bp	KMT2A-MLLT10	AML	AML	KMT2A	AML	no-ITD	-52.0338	-3.15956
SJAML040662_D1	Unstranded_mRNA_PE75bp	RUNX1-RUNX1T1	AML	AML	RUNX1-RUNX1T1	AML	TKD	-57.2497	52.553
SJAML040664_D1	Unstranded_mRNA_PE75bp	KMT2A-MLLT3	AML	AML	KMT2A	AML	no-ITD	-70.3923	2.24158
SJAML040665_D1	Unstranded_mRNA_PE75bp	NUP98-HOXD13	AML	AML	NUP98	AML	no-ITD	2.53875	38.8576
SJAML040666_D1	Unstranded_mRNA_PE75bp	CBFB-MYH11;NDE1-CBFB	AML	AML	CBFB-MYH11	AML	no-ITD	-82.3444	68.8987
SJAML040668_D1	Unstranded_mRNA_PE75bp	NUP98-NSD1	AML	AML	NUP98	AML	no-ITD	-36.5584	4.59261
SJTALL012401_D1	Stranded_total_RNA_PE100bp	NoFusion	T-ALL	T-ALL	T-other	ETP	no-ITD	-8.73946	60.3596

## Sheet: ST3.BCL11B group
Patient	Cohort	Diagnosis	SV group	Breakpoints (hg19)	RNA-seq	WGS tumor	WGS germline	H3K27ac HiChIP	FLT3	RUNX1	WT1mut	DNMT3A	TET2	CD1a	CD2	cCD3	CD5	CD7	CD8	CD11b	CD13	CD15	CD33	CD34	CD65 >20%	CD117	CD133	MPO	MPO%	TdT	CG
SJALL068271_D1	German-MLL	ETP	SATB1	3:18334192(+)>14:99799450(-), 14:99799251(-)>3:18334193(+)	Yes	Yes	No	No	ITD	deletion			pos	n.a.	1	1	0	1	0	0	0	dim	0	1	dim	dim	0	0	n.a.	dim	46,XX
SJALL068272_D1	German-MLL	ETP	BETA	14:99010720(+)>14:99008242(+)	Yes	Yes	No	No	WT					0	dim	1	0	1	0	n.a.	1	n.a.	0	1	0	1	n.a.	0	n.a.	1	48,XY,+4,+7,del(13)(q13q32)
SJALL068273_D1	German-MLL	ETP	CCDC26	14:99747793(+)>8:130359239(+), 8:130359028(+)>14:99747792(+)	Yes	Yes	No	No	p.D835Y(0.27)	deletion				0	1	1	0	1	0	dim	0	1	0	1	0	dim	0	0	<3%	1	46,XY,t(8;14)(q24;q32),der(12)t(4;12)(?;p11)
SJMPAL068274_D1	German-MLL	MPAL(T/M)	BETA	14:99010720(+)>14:99008242(+)	Yes	Yes	No	No	ITD;p.N676K(0.32)			pos	pos	0	1	1	0	1	0	n.a.	1	0	0	dim	0	dim	0	1	n.a.	1	46,XY
SJMPAL068275_D1	German-MLL	MPAL(T/M)	CCDC26	14:99743097(+)>8:130228388(+), 8:130228629(+)>14:99743094(+)	Yes	Yes	No	No	ITD		pos			0	1	1	n.a.	1	n.a.	0	1	1	0	1	0	1	0	1	0.1	dim	46,XY.ish t(8;14)(q24;q32)(wcp14+;wcp8+)
SJMPAL068276_D1	German-MLL	MPAL(T/M)	CCDC26	14:99802536(+)>8:130230590(+), 8:130230597(+)>14:99802539(+)	Yes	Yes	No	No	ITD			pos		n.a.	1	1	n.a.	1	n.a.	dim	1	dim	0	1	0	1	1	dim	0.6	dim	46,XY,t(8;14)(q24;q32)
SJALL068277_D1	German-MLL	ETP	BETA	14:99010806(+)>14:99008328(+)	Yes	Yes	No	No	p.D835Y(0.46)		pos			0	1	1	0	1	0	0	1	0	0	1	dim	1	1	0	n.a.	1	46,XX
SJMPAL068278_D1	German-MLL	MPAL(T/M)	CCDC26	8:130507056(+)>14:99773531(+),,14:99773527(+)>8:130507066(+)	Yes	Yes	No	No	p.D835Y(0.42)			pos		0	1	1	0	1	0	dim	1	1	0	1	1	1	1	dim	0.2	dim	46,XX
SJALL068279_D1	German-MLL	ETP	ARID1B	6:156489324(+)>14:99619702(+), 14:99619704(+)>6:156489330(+)	Yes	Yes	No	Yes	p.D835Y(0.47)	mutation		pos		0	1	1	0	1	0	n.a.	1	n.a.	0	0	0	0	n.a.	0	n.a.	dim	47,XY,+4
SJALL068280_D1	German-MLL	ETP	ARID1B	6:156469854(+)>14:99739266 (+),	Yes	Yes	No	No	ITD		pos	pos		0	1	1	0	1	0	dim	1	0	0	1	0	1	1	0	n.a.	1	47,XY,+4,t(6;11;13;6;14)(p21;q13;q14;q26;q32).ish t(6;11;13;6;14)(D13S25-;D13S25-;D13S25-;D13S25-;D13S25-)
SJALL068281_D1	German-MLL	ETP	BETA	14:99010915(+)>14:99008437(+)	Yes	Yes	No	No	ITD	mutation				0	1	1	0	1	0	0	dim	0	0	1	0	1	1	0	n.a.	1	46,XY
SJMPAL068282_D1	German-MLL	MPAL(T/M)	ARID1B	8:124717116(+)>6:157179734(+), 6:156515011(+)>14:99439842(+)	Yes	Yes	No	No	WT	mutation	pos			0	1	1	0	1	0	dim	1	1	0	1	dim	1	1	1	n.a.	1	47,XY,+4,del(13)(q14q31)
SJALL068283_D1	German-MLL	ETP	CCDC26	8:130239711(+)>14:99846149(+),8:42870128(-)>8:130239711(+)	Yes	Yes	No	No	ITD			pos		0	1	1	0	1	0	0	dim	0	0	1	0	1	1	0	<3%	1	46,XX
SJMPAL068284_D1	German-MLL	MPAL(T/M)	CCDC26	14:99625239(+)>8:130736358(-)	Yes	Yes	No	No	ITD	deletion		pos	pos	n.a.	1	1	n.a.	1	n.a.	0	dim	1	0	0	dim	0	0	1	0.15	dim	NA
SJMPAL068285_D1	German-MLL	MPAL(T/M)	ARID1B	14:99738868(+)>6:156400518(+),6:156396781 (+)>14:99738532(+)	Yes	Yes	No	No	WT		pos			0	1	1	0	1	0	0	1	1	0	1	0	1	1	1	n.a.	1	46,XX
SJMPAL068286_D1	German-MLL	MPAL(T/M)	CCDC26	8:130546426(+)>14:99831738(+), 8:130546508(+)>14:99830655(-), 8:130546158(-)>8:130546521(+), 8:130546516(-)>8:130546163(+)	Yes	Yes	No	No	ITD			pos		0	1	1	0	1	0	dim	dim	0	0	1	0	1	0	1	0.27	0	46,XX,t(8;14)(q24;q32).ish t(8;14)(5'CMYC+,3'CMYC+,5'IGH+,3'IGH+;5'IGH-,3'IGH,5'CMYC-,3'CMYC+)
SJAML068287_D1	German-MLL	AML	CDK6	14:99420102(+)>7:92450923(+),7:92450920(+)>14:99420102(+)	Yes	Yes	No	No	ITD	deletion		pos		n.a.	1	0	n.a.	1	n.a.	0	1	1	0	1	0	1	1	1	n.a.	1	46,XY,t(7;14)(q21;q32)
SJALL068289_D1	German-MLL	AML	ZEB2	14:99740205(+)>2:145264262(+), 2:145264100(+)>14:99740289(+)	Yes	Yes	No	No	ITD	mutation				n.a.	n.a.	n.a.	n.a.	n.a.	n.a.	n.a.	n.a.	n.a.	n.a.	n.a.	n.a.	n.a.	n.a.	n.a.	n.a.	n.a.	46,XY,t(2;14)(q14;q32)
SJALL068291_D1	German-MLL	ETP	ARID1B	6:156491796(+)>14:99636438(+), 14:99636603(+)>6:156491755(+)	Yes	Yes	No	No	ITD	mutation				0	1	1	0	1	0	dim	1	0	0	0	0	dim	1	0	n.a.	1	48,XY,del(2)(q31q37),+4,t(6;14)(q25;q32),+i(8)(q10),i(8)(q10)
SJAUL068292_D1	German-MLL	AUL	CCDC26	14:99922115(+)>8:130458849(+),8:130458853(+)>14:99922191(+)	Yes	Yes	No	Yes	ITD			pos	pos	0	1	dim	0	1	0	0	1	1	0	1	0	1	dim	0	n.a.	1	46,XY,del(8)(q21),der(13)(14q32->14q32::8q21->8q24::13p11->13qter),der(14)t(8;14)(q24;q32),del(16)(q13q24).ish der(13)(3'CMYC+,5'CMYC+,IGH+),der(14)(3'CMYC+,5'CMYC-,IGH-)
SJALL068293_D1	German-MLL	AUL	ARID1B	14:99636738(+)>6:156678012(+), 6:156678003(+)>14:99636736(+)	Yes	Yes	No	No	ITD					0	1	0	n.a.	1	n.a.	dim	dim	1	0	1	dim	dim	0	0	n.a.	0	47,XY,+4
SJAML045737_D1	MPAL	AML	RUNX1	21:36268556(+)>14:59949024(+);14:99743520(+)>21:36268562(+)	Yes	Yes	No	No	ITD					n.a.	1	0	0	1	0	0	1	1	0	1	1	1	1	1	cplx	wk	46,XY
SJMPAL011912_D1	MPAL	MPAL(T/M)	BETA	14:99010720(+)>14:99008242(+)	Yes	Yes	No	No	ITD		pos			n.a.	1	0	0	1	0	wk	1	wk	wk	1	0	1	1	1	13	1	46,XY[20]
SJMPAL011913_D1	MPAL	MPAL(T/M)	ARID1B	14:99739290(+)>6:156433567(+), 6:156433907(+)>14:99739300(+)	Yes	Yes	No	No	ITD	splice				0	1	1	0	1	0	wk	1	1	wk	2	cplx	wk	1	cplx	3	1	46,XY,inv(7)(p24q11.2)[20]
SJMPAL011914_D1	MPAL	MPAL(T/M)	CDK6	7:92429630(+)>14:99420560(+),14:99420555(+)>21nt>7:92488429(+)	Yes	Yes	Yes	Yes	ITD		pos			0	1	wk	0	1	0	wk	1	1	wk	1	wk	1	1	see note	pos on IHC and ICC	1	46,XY,t(7;14)(q22;q32.1)[30]
SJMPAL011915_D1	MPAL	MPAL(T/M)	ZEB2	14:99747327(+)>2:145191646(+);2:145191772(+)>6:156967595(+);	Yes	Yes	Yes	No	ITD		pos			n.a.	1	wk	0	1	0	wk	cplx	1	0	1	wk	wk	1	wk	25	cplx	46,xx,?t(2;6;14)(q13;q25;q22),del(6)(p21),del(6)(q13),add(19)(p13.1),add(21)(q22)[20]
SJMPAL012420_D1	MPAL	MPAL(T/M)	ZEB2	2:68444802(-)>14:99748922(+), 14:99748975 (+)>2:145248055(+)	Yes	Yes	Yes	No	ITD					n.a	1	1	weak	1	0	0	1	1	weak	1	1	1	0	2	32	1	46,XX,der(2)?inv(2)(p11.2q13)t(2;14)(14qter->14q32.1::2p?->2qter),der(14)t(2;14)(14pter->14q32.1:: 2q13->2p12->2pter)[19]/46,XX[1]
SJMPAL012421_DT	MPAL	MPAL(T/M)	ARID1B	14:99749303(+)>6:156450827(+)	Yes	Yes	Yes	No	ITD					0	1	wk	0	1	0	cplx	1	1	wk	1	wk	1	1	cplx	24	1	QNS
SJMPAL016341_DT	MPAL	MPAL(T/M)	ARID1B	14:99739453(+)>6:156447208(+)	Yes	Yes	Yes	No	WT		pos			0	1	1	0	partial	0	n.a.	1	n.a.	partial	1	n.a.	1	n.a.	partial	n.a.	0	NA
SJMPAL040459_DT	MPAL	MPAL(T/M)	BETA	14:99010720(+)>14:99008242(+)	Yes	Yes	No	No	ITD		pos			0	1	1	0	1	0	1	0	n.a.	1	1	0	partial	n.a.	1	n.a.	n.a.	NA
SJMPAL042791_DT	MPAL	MPAL(T/M)	BETA	14:99010720(+)>14:99008242(+)	Yes	Yes	No	No	ITD		pos			n.a.	1	1	n.a.	1	n.a.	n.a.	1	n.a.	0	1	n.a.	n.a.	n.a.	partial	n.a.	n.a.	NA
SJMPAL042792_D1	MPAL	MPAL(T/M)	ZEB2	14:99733681(+)>2:145218181(+)	Yes	Yes	Yes	No	ITD					n.a.	1	1	n.a.	1	0	n.a.	1	n.a.	0	1	n.a.	1	n.a.	partial	n.a.	n.a.	NA
SJMPAL042793_DT	MPAL	MPAL(T/M)	ARID1B	6:156516402(+)>14:99746764(-),3:39082331(-)>14:99746778(+)	Yes	Yes	No	No	ITD	mutation				n.a.	1	1	n.a.	1	n.a.	n.a.	partial	n.a.	partial	1	n.a.	partial	n.a.	partial	n.a.	n.a.	NA
SJMPAL042794_DT	MPAL	MPAL(T/M)	ARID1B	14:99750123(+)>6:156474848(+)	Yes	Yes	Yes	No	p.D835Y(0.53)	mutation				n.a.	1	partial	n.a.	1	n.a.	0	1	n.a.	0	1	partial	1	n.a.	partial	n.a.	n.a.	NA
SJMPAL043509_D1	MPAL	MPAL(T/M)	ARID1B	6:156460945(+)>14:99742780(+), 14:99743474(+)>6:156460845(+)	Yes	Yes	No	No	WT		pos			n.a.	1	1	0	1	n.a.	0	1	1	0	1	n.a.	1	1	partial	1	1	46,XY,i(17)(q10)[1]/46,XX(Donor)[12]/46,XY[7]
SJMPAL044953_D1	MPAL	MPAL(T/M)	NA	NA	Yes	No	No	No	ITD		pos			n.a.	1	partial	n.a.	1	n.a.	0	partial	n.a.	partial	1	n.a.	1	n.a.	partial	n.a.	n.a.	46,XY[20]
SJTALL002141_D1	TARGET-TALL	ETP	ARID1B	6:156543375(+)>14:98960455(+)	Yes	Yes	Yes	No	p.V491L(0.39)	mutation				n.a.	n.a.	n.a.	n.a.	n.a.	n.a.	n.a.	n.a.	n.a.	n.a.	n.a.	n.a.	n.a.	n.a.	n.a.	n.a.	n.a.
SJTALL022649_D2	TARGET-TALL	ETP	ARID1B	6:164352424 (+)>14:99420982 (-), 14: 99756180(+)>6:156647405 (-)	Yes	Yes	Yes	No	WT		pos			n.a.	n.a.	n.a.	n.a.	n.a.	n.a.	n.a.	n.a.	n.a.	n.a.	n.a.	n.a.	n.a.	n.a.	n.a.	n.a.	n.a.
SJTALL187_D	RNAseqOther	ETP	RUNX1	12:36420388 (+)>14:99740386(-), 14:99740342(-) >21:36254128(+), 21 36254221(+)>21: 36420650(+)	Yes	Yes	Yes	No	ITD;p.D835Y(0.21)					n.a.	n.a.	n.a.	n.a.	n.a.	n.a.	n.a.	n.a.	n.a.	n.a.	n.a.	n.a.	n.a.	n.a.	n.a.	n.a.	n.a.
SJTALL012399_D1	RNAseqOther	ETP	ARID1B	6:156560640 (+) >14:99770605 (-), 14: 94486561 (+) >14: 99991588 (+), 6:157298431 (-)>14:94743005(+)	Yes	Yes	Yes	No	ITD					n.a.	n.a.	n.a.	n.a.	n.a.	n.a.	n.a.	n.a.	n.a.	n.a.	n.a.	n.a.	n.a.	n.a.	n.a.	n.a.	n.a.
SJTALL011_D	TotalXVI	ETP	ARID1B	14:99743231(+)>6:156436257(+)	Yes	Yes	Yes	No	p.D835Y(0.39)					n.a.	n.a.	n.a.	n.a.	n.a.	n.a.	n.a.	n.a.	n.a.	n.a.	n.a.	n.a.	n.a.	n.a.	n.a.	n.a.	n.a.
SJTALL022442_D2	TARGET-TALL	ETP	BETA	14:99010985(+)>14:99008314(+)	Yes	Yes	Yes	No	ITD		pos			n.a.	n.a.	n.a.	n.a.	n.a.	n.a.	n.a.	n.a.	n.a.	n.a.	n.a.	n.a.	n.a.	n.a.	n.a.	n.a.	n.a.
SJALL015251_D1	TARGET-TALL	NA	BETA	NA	Yes	No	No	No	ITD		pos			n.a.	n.a.	n.a.	n.a.	n.a.	n.a.	n.a.	n.a.	n.a.	n.a.	n.a.	n.a.	n.a.	n.a.	n.a.	n.a.	n.a.
SJALL016430_D1	TARGET-TALL	NA	NA	NA	Yes	No	No	No	ITD					n.a.	n.a.	n.a.	n.a.	n.a.	n.a.	n.a.	n.a.	n.a.	n.a.	n.a.	n.a.	n.a.	n.a.	n.a.	n.a.	n.a.
SJTALL177_E	TARGET-TALL	ETP	NA	NA	Yes	No	No	No	ITD					n.a.	n.a.	n.a.	n.a.	n.a.	n.a.	n.a.	n.a.	n.a.	n.a.	n.a.	n.a.	n.a.	n.a.	n.a.	n.a.	n.a.
SJTALL005006_D2	CPML	ETP	BETA	14:99010720(+)>14:99008242(+)	Yes	Yes	Yes	Yes	ITD					0	1	1	0	1	0	wk	1	0	1	1	0	1	1	0	n.a.	1	46,XY
SJALL044291_D1	CPML	ETP	ARID1B	6:156436789(+)>14:99740390(+), 14:99740366(+)>6:156436801(+)	Yes	Yes	No	No	ITD;p.D835Y(0.11)					n.a.	n.a.	n.a.	n.a.	n.a.	n.a.	n.a.	n.a.	n.a.	n.a.	n.a.	n.a.	n.a.	n.a.	n.a.	n.a.	n.a.
SJALL060401_D1	CPML	NA	ARID1B	6:156442163(+)>14:99744306(+), 14:99744414(+)>6:156442248(+)	Yes	Yes	No	No	WT					n.a.	n.a.	n.a.	n.a.	n.a.	n.a.	n.a.	n.a.	n.a.	n.a.	n.a.	n.a.	n.a.	n.a.	n.a.	n.a.	n.a.
SJALL018294_D2	CPML	ETP	ARID1B	6:156471659(+)>14:99751857(+), 14:99751907(+)>6:156471464(+)	Yes	Yes	Yes	No	ITD					n.a.	n.a.	n.a.	n.a.	n.a.	n.a.	n.a.	n.a.	n.a.	n.a.	n.a.	n.a.	n.a.	n.a.	n.a.	n.a.	n.a.
SJALL016829_D1	RNAseqOther	NA	NA	NA	Yes	No	No	No	WT					n.a.	n.a.	n.a.	n.a.	n.a.	n.a.	n.a.	n.a.	n.a.	n.a.	n.a.	n.a.	n.a.	n.a.	n.a.	n.a.	n.a.
SJAML040681_D1	Induction Failure	AML	ETV6	12:11956435(-)>14:99744520(+), 14:99744975(+)>12:11956620(-)	Yes	Yes	No	No	ITD		pos			nd	nd	nd	nd	0	nd	0	1	nd	dim	1	nd	1	nd	nd	n.a.	nd	46,XX,inv(2)(p13q22)mat[25]
SJAML040695_D1	Induction Failure	AML	ARID1B	6:156534200(+)>14:99525103(+)	Yes	Yes	No	No	WT		pos			nd	nd	nd	nd	0	nd	0	1	nd	0	1	nd	1	nd	nd	n.a.	nd	46,XX,add(9)(p13),+21[16]/46,XX[2]
SJAML040680_D1	Induction Failure	AML	ARID1B	14:99739451(+)>6:156440433(+), 6:156440512(+)>14:99738477(+)	Yes	Yes	No	No	p.D835Y (0.48)		pos			nd	nd	nd	nd	0	nd	0	1	nd	dim	1	nd	1	nd	nd	n.a.	nd	46,XY,add(14)(q32)[18]/45,idem,psu dic(9;9)(p11;p22)[2]
SJAML040673_D1	Induction Failure	AML	ARID1B	6:156652772(+)>14:99582375(+)	Yes	Yes	No	No	p.D835Y (0.65)		pos			nd	nd	nd	nd	0	nd	0	1	nd	0	1	nd	1	nd	nd	n.a.	nd	47,XY,+4,t(15;21)(q22;q22)[11]/46,XY[10].ish AML1sp
SJAML040684_D1	Induction Failure	AML	CDK6	7:92396660(+)>14:99597243(+), 14:99597196 (+)>16:82856157 (-)	Yes	Yes	No	No	WT	mutation			p.Q803*	nd	nd	nd	nd	dim	nd	dim	1	nd	0	1	nd	1	nd	nd	n.a.	nd	46,XX,del(7)(q22)[15]/46,XX[5]
SJAML040689_D1	Induction Failure	AML	BETA	14:99010720(+)>14:99008242(+)	Yes	Yes	No	No	ITD					nd	nd	nd	nd	dim	nd	0	1	nd	0	1	nd	1	nd	nd	n.a.	nd	46,XY[20]
SJMPAL011911_D1	MPAL	MPAL(T/M)	BETA	14:99010669(+)>14:99008191(+)	Yes	Yes	Yes	Yes	ITD	mutation	pos	neg	neg	n.a.	n.a.	n.a.	n.a.	n.a.	n.a.	n.a.	n.a.	n.a.	n.a.	n.a.	n.a.	n.a.	n.a.	n.a.	n.a.	n.a.	46,XY[20]
SJAML040498_D1	TARGET-AML	AML	BETA	NA	Yes	No	No	No	ITD					n.a.	n.a.	n.a.	n.a.	n.a.	n.a.	n.a.	n.a.	n.a.	n.a.	n.a.	n.a.	n.a.	n.a.	n.a.	n.a.	n.a.
SJTALL031897_D1	ClinGen	ETP	ARID1B	14:99762244(+)>6:156393686(+)	Yes	Yes	Yes	No	ITD					n.a.	n.a.	n.a.	n.a.	n.a.	n.a.	n.a.	n.a.	n.a.	n.a.	n.a.	n.a.	n.a.	n.a.	n.a.	n.a.	n.a.
SJTALL067498_C1	COG_TALL	ETP	NA	NA	Yes	No	No	No	ITD					n.a.	n.a.	n.a.	n.a.	n.a.	n.a.	n.a.	n.a.	n.a.	n.a.	n.a.	n.a.	n.a.	n.a.	n.a.	n.a.	n.a.
SJTALL067437_C1	COG_TALL	NA	NA	NA	Yes	No	No	No	no-ITD					n.a.	n.a.	n.a.	n.a.	n.a.	n.a.	n.a.	n.a.	n.a.	n.a.	n.a.	n.a.	n.a.	n.a.	n.a.	n.a.	n.a.

## Sheet: ST4.TCR analysis
		Number								%
		Total (genome only + genome/expression)				Genome/Expression				Total (genome only + genome/expression)				Genome/Expression
Subgroup	Samples analyzed	TCRG	TCRD	TCRB	TCRA	TCRG	TCRD	TCRB	TCRA	TCRG	TCRD	TCRB	TCRA	TCRG	TCRD	TCRB	TCRA
BCL11B group	53	0	0	0	0	0	0	0	0	0	0	0	0	0	0	0	0
nonBCL11B-ETP	30	17	9	6	0	10	5	2	0	56.7	30	20	0	33.3	16.7	6.7	0
nonBCL11B-MPAL	43	13	3	7	1	3	1	0	0	30.2	7	16.3	2.3	7	2.3	0	0
nonBCL11B-nonETP-TALL	53	51	18	45	26	12	7	42	6	96.2	34	84.9	49.1	22.6	13.2	79.2	11.3
* Excluding gamma-delta T-ALL

## Sheet: ST5.ASE
Patient	Diagnosis	Subtype	BCL11B SV	ASE p-value	mean vaf difference	vaf difference SD	mean reads coverage	reads coverage SD
SJALL068279_D1	ETP	BCL11B	ARID1B	0	0.495372	0.0489438	46.1136	45.6809
SJMPAL011913_D1	MPAL(T/M)	BCL11B	ARID1B	0	0.495414	0.0688432	19.3939	34.7424
SJMPAL016341_DT	MPAL(T/M)	BCL11B	ARID1B	0	0.478289	0.0875741	84.9818	38.1763
SJTALL031897_D1	ETP	BCL11B	ARID1B	0	0.480634	0.0820555	124.194	62.0536
SJTALL002141_D1	ETP	BCL11B	ARID1B	8.95983e-08	0.479724	0.0764919	80.0108	47.2559
SJMPAL042794_DT	MPAL(T/M)	BCL11B	ARID1B	2.70656e-06	0.467385	0.0761458	57.1545	33.2573
SJMPAL042793_DT	MPAL(T/M)	BCL11B	ARID1B	3.92142e-06	0.478124	0.0774122	49.9639	28.5911
SJALL068291_D1	ETP	BCL11B	ARID1B	1.06792e-05	0.494557	0.0608247	40.6055	27.9593
SJAML040695_D1	AML	BCL11B	ARID1B	1.41297e-05	0.340062	0.0903019	36.3514	42.5116
SJMPAL068282_D1	MPAL(T/M)	BCL11B	ARID1B	4.30467e-05	0.467498	0.0747083	42.019	31.7856
SJALL068280_D1	ETP	BCL11B	ARID1B	4.76884e-05	0.488149	0.0707858	39.065	25.1786
SJTALL011_D	ETP	BCL11B	ARID1B	5.07067e-05	0.524576	0.0973651	33.1728	14.8145
SJMPAL043509_D1	MPAL(T/M)	BCL11B	ARID1B	5.59934e-05	0.459062	0.0856156	38.8	13.2448
SJTALL012399_D1	ETP	BCL11B	ARID1B	0.000158679	0.477198	0.0835383	30.3415	20.103
SJALL044291_D1	ETP	BCL11B	ARID1B	0.000164582	0.504438	0.100047	23.2963	14.5065
SJALL018294_D2	ETP	BCL11B	ARID1B	0.000276664	0.484475	0.0816794	23.8864	33.4074
SJMPAL012421_DT	MPAL(T/M)	BCL11B	ARID1B	0.000683677	0.459713	0.111071	23.7143	12.2838
SJAML040673_D1	AML	BCL11B	ARID1B	0.00078134	0.353112	0.0986351	18.56	20.5469
SJAML040680_D1	AML	BCL11B	ARID1B	0.000982019	0.467712	0.107761	16.8864	15.8865
SJTALL022649_D2	ETP	BCL11B	ARID1B	0.00100892	0.34267	0.0690984	17.1522	9.49612
SJALL060401_D1	T-ALL	BCL11B	ARID1B	0.00126107	0.483089	0.0901576	12.5972	16.8529
SJMPAL068285_D1	MPAL(T/M)	BCL11B	ARID1B	0.00676441	0.370496	0.135873	18.8571	10.1203
SJALL068293_D1	AUL	BCL11B	ARID1B	0.00991585	0.363063	0.125733	18.9057	12.2432
SJAML040689_D1	AML	BCL11B	BETA	3.2894e-05	0.503542	0.0537406	28.5179	30.2787
SJMPAL042791_DT	MPAL(T/M)	BCL11B	BETA	7.48355e-05	0.493601	0.0888336	47.7778	32.5798
SJMPAL040459_DT	MPAL(T/M)	BCL11B	BETA	0.000135777	0.457547	0.0758689	35.119	18.5383
SJALL068281_D1	ETP	BCL11B	BETA	0.000335114	0.496766	0.0563016	14.6316	12.9238
SJALL068277_D1	ETP	BCL11B	BETA	0.000526398	0.416272	0.0986305	25.9605	25.5319
SJMPAL011912_D1	MPAL(T/M)	BCL11B	BETA	0.000817438	0.502041	0.0775675	16.5217	29.0719
SJMPAL068274_D1	MPAL(T/M)	BCL11B	BETA	0.0010451	0.498755	0.0797105	14.8235	8.37582
SJTALL005006_D2	ETP	BCL11B	BETA	0.00142853	0.5104	0.101943	15.25	5.22015
SJMPAL011911_D1	MPAL(T/M)	BCL11B	BETA	0.00608309	0.467241	0.0920357	9.7	3.74314
SJTALL022442_D2	ETP	BCL11B	BETA	0.00647703	0.463373	0.134173	10.197	4.41055
SJALL068272_D1	ETP	BCL11B	BETA	0.0120636	0.275905	0.0977449	21.7647	12.3112
SJMPAL068284_D1	MPAL(T/M)	BCL11B	CCDC26	0.000357803	0.442779	0.0873186	20.92	17.2069
SJMPAL068275_D1	MPAL(T/M)	BCL11B	CCDC26	0.000561007	0.476363	0.0658215	18.8778	12.7145
SJMPAL068276_D1	MPAL(T/M)	BCL11B	CCDC26	0.000731277	0.468385	0.0875094	19.5238	17.2569
SJALL068273_D1	ETP	BCL11B	CCDC26	0.000823415	0.468219	0.0732592	18.4568	14.6014
SJMPAL068286_D1	MPAL(T/M)	BCL11B	CCDC26	0.00102988	0.457411	0.0765351	14.9886	9.59824
SJMPAL068278_D1	MPAL(T/M)	BCL11B	CCDC26	0.00127715	0.474356	0.0752573	13.0182	9.5984
SJAUL068292_D1	AUL	BCL11B	CCDC26	0.00136327	0.482941	0.0684506	15.0833	10.5869
SJALL068283_D1	ETP	BCL11B	CCDC26	0.0197538	0.303548	0.108718	22.2353	14.7814
SJAML068287_D1	AML	BCL11B	CDK6	0	0.472065	0.0655536	52.8551	89.6313
SJMPAL011914_D1	MPAL(T/M)	BCL11B	CDK6	0	0.481128	0.091031	28.3966	39.5736
SJAML040684_D1	AML	BCL11B	CDK6	0.00309747	0.335698	0.16763	27.6863	26.2256
SJAML040681_D1	AML	BCL11B	ETV6	0	0.51612	0.116408	81.25	75.553
SJTALL187_D	ETP	BCL11B	RUNX1	0	0.492959	0.0858677	130.811	89.3536
SJAML045737_D1	AML	BCL11B	RUNX1	0.000864791	0.478777	0.0850847	16.8767	7.67381
SJALL068271_D1	ETP	BCL11B	SATB1	0.000114758	0.47357	0.0604729	20.0857	22.7717
SJALL068289_D1	AML	BCL11B	ZEB2	0	0.483764	0.0640864	34.9651	47.322
SJMPAL042792_D1	MPAL(T/M)	BCL11B	ZEB2	0.000265194	0.498	0.127009	16.7143	13.6347
SJMPAL012420_D1	MPAL(T/M)	BCL11B	ZEB2	0.00069621	0.500273	0.0818248	19.3913	16.6926
SJMPAL011915_D1	MPAL(T/M)	BCL11B	ZEB2	0.00172181	0.520225	0.101971	9.23077	7.45283
SJALL071712_D1	T-ALL	TLX1	NA	0.000138258	0.445441	0.0998325	37.686	29.9062
SJALL071711_D1	T-ALL	TLX1	NA	0.000515674	0.5005	0.0662021	16.5	9.33631
SJALL071707_D1	T-ALL	TLX1	NA	0.00128214	0.382813	0.126213	18.1515	24.1828
SJALL071713_D1	T-ALL	TLX1	NA	0.0282621	0.104581	0.077308	72.6667	60.7152
SJALL071699_D1	T-ALL	TLX1	NA	0.165533	0.154442	0.126917	41.6842	44.8653
SJALL071704_D1	T-ALL	TLX1	NA	0.173652	0.140653	0.126336	23.6377	21.5099
SJALL071703_D1	T-ALL	TLX1	NA	0.177028	0.12826	0.0652853	40.75	50.9176
SJALL071708_D1	T-ALL	TLX1	NA	0.180833	0.17991	0.138192	29.4054	36.0528
SJALL071706_D1	T-ALL	TLX1	NA	0.183567	0.132221	0.109707	36.4458	39.2811
SJALL071698_D1	T-ALL	TLX1	NA	0.204225	0.167751	0.145036	40.72	49.9713
SJALL071710_D1	T-ALL	TLX1	NA	0.207797	0.127916	0.113959	32.2024	19.5391
SJALL071701_D1	T-ALL	TLX1	NA	0.23886	0.16141	0.131275	14	13.4907
SJALL071709_D1	T-ALL	TLX1	NA	0.245426	0.140964	0.13386	22.0244	20.3168
SJALL071700_D1	T-ALL	TLX1	NA	0.278127	0.125334	0.0757909	22	9.12539
SJALL071718_D1	T-ALL	TLX3	NA	0.000103673	0.451754	0.0836526	26.2532	25.2797
SJALL015990_D1	T-ALL	TLX3	NA	0.000229236	0.492673	0.098999	18.8421	32.4915
SJALL071714_D1	T-ALL	TLX3	NA	0.000540083	0.495677	0.0681716	17.3421	14.2076
SJALL071719_D1	T-ALL	TLX3	NA	0.000700552	0.461851	0.0691692	16.8243	8.84007
SJALL071720_D1	T-ALL	TLX3	NA	0.0155728	0.38151	0.136839	11.2667	3.5146
SJALL071717_D1	T-ALL	TLX3	NA	0.276575	0.0828594	0.0653223	80.913	158.36

## Sheet: ST6.Mut.BCL11Bgroup
Patient ID	Chromosome	Start_hg19	Reference allele	Variant allele	Tumor total depth	Tumor variant depth	Germline total depth	Germline variant depth	Gene	Transcript	Mut class	Amino acid change	Seq type*
SJALL015251	chr1	47610084	G	T	249	111	290	4	CYP4A22	NM_001010969.4	missense	p.K282N	Exome
SJALL015251	chr1	65312347	C	A	312	139	366	3	JAK1	NM_001320923.1	missense	p.V658F	Exome
SJALL015251	chr3	52637548	TCTT	T	49	12	47	0	PBRM1	NM_001366071.2	in-frame_del	p.E943del	Exome
SJALL015251	chr3	65349162	G	A	162	81	217	0	MAGI1	NM_001033057.2	missense	p.A1158V	Exome
SJALL015251	chr3	196796119	G	T	223	97	230	1	DLG1	NM_004087.2	missense	p.S706Y	Exome
SJALL015251	chr6	28194921	A	G	210	96	255	1	ZSCAN9	NM_001199479.2	missense	p.E20G	Exome
SJALL015251	chr7	82785290	G	C	163	72	188	0	PCLO	NM_033026.6	missense	p.Q223E	Exome
SJALL015251	chr7	100675650	C	T	496	75	523	0	MUC17	NM_001040105.2	missense	p.T318M	Exome
SJALL015251	chr7	148523614	G	C	335	158	387	1	EZH2	NM_004456.5	missense	p.S280C	Exome
SJALL015251	chr8	27516236	G	C	276	14	288	0	SCARA3	NM_016240.3	missense	p.Q183H	Exome
SJALL015251	chr11	32413565	C	G	73	32	84	3	WT1	NM_024426.6	missense	p.R467P	Exome
SJALL015251	chr11	48346931	C	T	339	100	379	1	OR4C3	NM_001004702.2	missense	p.R120C	Exome
SJALL015251	chr15	71952965	G	A	123	32	111	0	THSD4	NM_024817.2	missense	p.V417M	Exome
SJALL015251	chr16	67650762	G	T	297	144	290	0	CTCF	NM_006565.4	missense	p.C356F	Exome
SJALL015251	chr19	8486732	C	T	56	27	46	0	MARCHF2	NM_001005415.1	missense	p.T3M	Exome
SJALL015251	chr21	36164829	T	TGAGA	136	51	149	0	RUNX1	NM_001754.4	frame_shift_ins	p.Y349fs	Exome
SJALL016430	chr2	44102513	G	A	26	14	54	0	ABCG8	NM_022437.3	missense	p.A573T	Exome
SJALL016430	chr2	170684432	T	A	17	7	28	0	UBR3	NM_172070.4	missense	p.S139T	Exome
SJALL016430	chr2	179720196	C	T	121	66	118	0	CCDC141	NM_173648.4	missense	p.V980I	Exome
SJALL016430	chr2	219129801	G	A	30	18	40	2	AAMP	NM_001302545.2	missense	p.R392C	Exome
SJALL016430	chr5	118968470	T	C	73	32	85	0	FAM170A	NM_001367956.1	missense	p.L33P	Exome
SJALL016430	chr6	31544319	G	T	49	23	57	0	TNF	NM_000594.4	missense	p.R65S	Exome
SJALL016430	chr11	18763858	C	T	49	17	59	0	PTPN5	NM_006906.2	missense	p.E226K	Exome
SJALL016430	chr12	26553126	C	T	99	49	139	0	ITPR2	NM_002223.4	missense	p.V2489M	Exome
SJALL016430	chr15	50271895	C	T	80	31	114	0	ATP8B4	NM_024837.4	missense	p.S318N	Exome
SJALL016430	chr18	47379838	C	T	73	41	102	1	MYO5B	NM_001080467.3	missense	p.R1401Q	Exome
SJALL016430	chr20	50407130	C	T	83	42	87	1	SALL4	NM_020436.5	missense	p.C631Y	Exome
SJALL016430	chr21	36252941	A	AGCCCGGGTCCG	55	20	69	0	RUNX1	NM_001754.4	frame_shift_ins	p.S141fs	Exome
SJALL016430	chrX	41075851	C	T	71	65	76	1	USP9X	NM_001039590.3	nonsense	p.Q2011*	Exome
SJALL018294	chr2	220414027	G	A	239	71	265	0	TMEM198	NM_001303098.1	missense	p.R299Q	Exome
SJALL018294	chr6	52133889	T	TA	72	30	103	0	MCM3	NM_001366369.2	frame_shift_ins	p.K655fs	Exome
SJALL018294	chr7	148507484	TCAG	T	117	32	148	0	EZH2	NM_004456.5	in-frame_del	p.A656del	Exome
SJALL018294	chr7	148507488	C	T	89	25	109	0	EZH2	NM_004456.5	missense	p.A656T	Exome
SJALL018294	chr7	151078735	A	G	22	7	10	0	WDR86	NM_198285.3	missense	p.M355T	Exome
SJALL018294	chr9	125617580	G	A	300	41	408	0	RC3H2	NM_001100588.3	missense	p.P900S	Exome
SJALL018294	chr11	71249226	T	C	360	145	458	0	KRTAP5-8	NM_021046.3	missense	p.V42A	Exome
SJALL018294	chr12	122990109	A	C	111	22	129	0	RSRC2	NM_023012.6	missense	p.F424V	Exome
SJALL018294	chr15	88669502	C	T	232	84	280	0	NTRK3	NM_001012338.2	missense	p.G466S	Exome
SJALL018294	chr19	36515354	T	G	170	21	212	0	CLIP3	NM_001199570.2	missense	p.M288L	Exome
SJALL018294	chr22	19137658	G	A	12	7	3	0	GSC2	NM_005315.1	missense	p.R47C	Exome
SJAML040498	chr3	140185548	C	T	41	16	57	0	CLSTN2	NM_022131.3	missense	p.A440V	Complete Genomics
SJAML040498	chr9	132630419	C	T	36	14	80	0	USP20	NM_006676.7	missense	p.R276W	Complete Genomics
SJAML040498	chr11	32413565	C	G	52	48	48	0	WT1	NM_024426.6	missense	p.R467P	Complete Genomics
SJAML040498	chr14	102493608	A	G	30	7	39	1	DYNC1H1	NM_001376.5	missense	p.S2957G	Complete Genomics
SJAML040498	chr15	79587229	A	T	27	10	43	0	ANKRD34C	NM_001146341.2	missense	p.T535S	Complete Genomics
SJAML040498	chr17	35988658	T	G	14	4	22	0	DDX52	NM_007010.5	missense	p.H269P	Complete Genomics
SJAML040673	chr1	15430645	C	T	21	13	missing	missing	KAZN	NM_201628.3	missense	p.H670Y	Exome
SJAML040673	chr3	184573607	G	C	23	6	missing	missing	VPS8	NM_001349293.1	splice	p.L381sp	Exome
[truncated: 288 more rows]

## Sheet: ST7.Mut.Keygenes.NonB.DNA
Patient ID	Chromosome	Start_hg19	Reference allele	Variant allele	Tumor total depth	Tumor variant depth	Germline total depth	Germline variant depth	Gene	Transcript	Mut class	Amino acid change	Seq type*
[truncated: 591 more rows]

[truncated: 8 more sheets: ST8.Mut.Keygenes.NonB.RNA, ST9.CNV.Keygenes, ST10.WGS MLL, ST11.validation, ST12.Outcome, ST13.PacBio.BETA, ST14.CD34 Expression, ST15.GSEA]
